# Supplementary material for: Using parasite genetic and human mobility data to infer local and cross-border malaria connectivity in Southern Africa
Source: eLife journal article supplement (doi:10.7554/elife.43510), 2019-04-01
Supplement: supp [file elife-43510-supp-v1.zip]

Archive with 12 entries (12 files):
- elife_poa_e43510_Figure_2_figure_supplement_1.pdf
- elife_poa_e43510_Figure_2_figure_supplement_4.pdf
- elife_poa_e43510_Transparent_Reporting_File.docx
- elife_poa_e43510_Figure_3_source_data_1.xlsx
- elife_poa_e43510_Figure_4_figure_supplement_2.pdf
- elife_poa_e43510_Figure_1_figure_supplement_1.pdf
- elife_poa_e43510_Figure_2_figure_supplement_3.pdf
- elife_poa_e43510_Figure_2_figure_supplement_2.pdf
- elife_poa_e43510_Figure_4_figure_supplement_1.pdf
- elife_poa_e43510_Supplementary_File_1.xlsx
- elife_poa_e43510_Figure_5_source_data_1.xlsx
- elife_poa_e43510_Figure_4_source_data_1.xlsx
