# Supplementary material for: Using parasite genetic and human mobility data to infer local and cross-border malaria connectivity in Southern Africa
Source: eLife journal article supplement (doi:10.7554/elife.43510), 2019-04-01
Supplement: supp [file elife-43510-supp-v1.zip › elife_poa_e43510_Figure_3_source_data_1.xlsx]

## Sheet: Figure 3A
	Sauyemwa C	Rundu DH	Ndama C	Nkarapamwe C	Kaisosi C	Kayengona C	Sambyu HC	Mashare C	Mabushe	Ndonga Linenea	Karukuta C	Nyangana DH	Katere C	Shinyungwe C	Mbambi East	Kangongo C	Mayara C	Biro C	Shadikongoro C	Andara DH	Divundu C	Mutjiku C	Old Bagani C	Sesheke C	Choi C	Sibbinda HC	Chinchimani C	Kanono C	Kasheshe C
Sauyemwa C	NA	0.000168862	0.00196514	0.00462064	0.00225826	0.00566119	0.00350011	0.000118479	0.000606589	0	0.00702673	0.0115488	0.000438343	3.24367e-05	0.00114002	0.000119979	0.00119207	0.000298248	0	0.000770029	0.000140199	0.000453621	0	0	0.000310344	0	0.000212706	0.00791591	0
Rundu DH	NA	NA	0.000639696	0.000563252	0.000166852	0	0.00144005	0	6.22297e-05	0.000209981	7.7245e-05	0.000245546	0	0	0.000429653	0	0.000199216	0.00049223	0	0	0	0.000587889	0	0	0.000589614	0.000112754	0.000567196	0	0
Ndama C	NA	NA	NA	0.000548989	0.00316686	0.00330392	0.00385615	0.00114769	0.00237866	0.000945612	0.00261354	0.0145258	0.00128447	0	0	0	0.0069197	0.000474536	0	0.000220773	0.00046886	0.000500501	0	0.000128614	0.000808524	0.000125125	0.00203368	0	0.0007051
Nkarapamwe C	NA	NA	NA	NA	0.00470358	0.00656192	0.010941	0.00100693	0.00872027	0.0110169	0.0127933	0.0263093	0.00552225	0.000316917	0.0132445	0.000219587	0.0174495	0.00972053	6.68112e-05	0.000970608	0.000559487	0.000561167	0.000279849	0.00827141	0.017203	0.00629887	0.00219085	0.00050735	0.00801508
Kaisosi C	NA	NA	NA	NA	NA	0.000879854	0.00716386	0.00168345	0.00648189	0.00448756	0.00496432	0.0171455	0.00318128	0.00455877	0.00149519	0.000152555	0.00707625	0.00225047	0	0.000521357	0.000594784	0.00142185	0.00053478	0.00505241	0.0142585	0.00226808	0.00658457	0.00274389	0.00085584
Kayengona C	NA	NA	NA	NA	NA	NA	0.00803333	0.000444728	0.00142618	0.00092354	0.0107329	0.0165183	0.00123998	0.000851768	0.000466034	0.000537208	0.0105076	0	0	0.00170503	0.000233481	0.000437204	0.000247321	0.00310301	0.0112179	0.0041382	0.00250289	0.0445777	0
Sambyu HC	NA	NA	NA	NA	NA	NA	NA	0.00838455	0.0220424	0.00957074	0.0168085	0.0237633	0.00192382	0.000107686	0	0.00116701	0.0314049	0.01004	0.00173936	0.00427511	0.000172174	0.00459407	0.0007051	0.00488831	0.0122522	0.00629348	0.0015456	0.00037785	0
Mashare C	NA	NA	NA	NA	NA	NA	NA	NA	0.0111108	0.000161701	0.00244796	0.0111197	0.00151831	0.000159883	0.000327847	0.000166583	0.000300068	0.000287292	0	0.00050417	0.000384918	0	0	0	0	0	0	0	0
Mabushe	NA	NA	NA	NA	NA	NA	NA	NA	NA	0.0069142	0.014808	0.0250377	0.00511519	0.000110339	0	0.000120773	0.0359904	9.60094e-05	7.69007e-05	0.000157233	0	0	0	0.00277302	0.00662294	0.00529385	0	0	0
Ndonga Linenea	NA	NA	NA	NA	NA	NA	NA	NA	NA	NA	0.0133005	0.0373871	0.00790969	0.000496305	0.0389407	0.00144853	0.0229324	0.00728069	0	0.00136927	0.000888647	0	0.000278074	0.0109501	0.0257022	0.0107508	0	0	5.98816e-05
Karukuta C	NA	NA	NA	NA	NA	NA	NA	NA	NA	NA	NA	0.0326455	0.00738451	0.00203209	0.0182509	0.00072904	0.014413	0.00815733	0.00089364	0.00512543	0.00208067	0.0004796	0.000594001	0.0151765	0.0299945	0.00831632	0.00231749	0.00113784	0.0139241
Nyangana DH	NA	NA	NA	NA	NA	NA	NA	NA	NA	NA	NA	NA	0.0344301	0.0102987	0.0325558	0.0040415	0.046913	0.0386608	0.0498438	0.0198818	0.00943425	0	0.00616032	0.0304442	0.0399446	0.0302019	0.0294641	0.0563592	0.0236051
Katere C	NA	NA	NA	NA	NA	NA	NA	NA	NA	NA	NA	NA	NA	0.00620711	0.000924929	0	0.013866	0.00129426	0.000262614	0.00146188	0.000409343	0.00021839	6.89873e-05	0.0084921	0.0198494	0.0017193	0.0123159	0.0106396	0
Shinyungwe C	NA	NA	NA	NA	NA	NA	NA	NA	NA	NA	NA	NA	NA	NA	0.00533273	0.000464328	0.00386027	0.0022506	0	0.000182674	0	0.000813393	0	0.000238971	5.28787e-05	0.000421913	0.000307812	0.000307812	0
Mbambi East	NA	NA	NA	NA	NA	NA	NA	NA	NA	NA	NA	NA	NA	NA	NA	0.00136831	0.0931164	0.124559	0.00170279	0.0121645	0.000260608	0.000262776	0.000101519	0.000156327	0.0696577	0.000260687	0.0418796	0.0301341	0.00082713
Kangongo C	NA	NA	NA	NA	NA	NA	NA	NA	NA	NA	NA	NA	NA	NA	NA	NA	0.00292502	0.000961088	0.000401572	0.00101711	0.00113097	0.000536769	0	8.73057e-05	0	0	0.00317436	0	0.000337399
Mayara C	NA	NA	NA	NA	NA	NA	NA	NA	NA	NA	NA	NA	NA	NA	NA	NA	NA	0.0974002	0.000250035	0.0160439	0.0026089	0	0.000683877	0.0248832	0.0373781	0.0316512	0.0118254	0.0404417	0.0290368
Biro C	NA	NA	NA	NA	NA	NA	NA	NA	NA	NA	NA	NA	NA	NA	NA	NA	NA	NA	0.0053971	0.00642572	0.000966991	0.00140152	0.00237429	0.00944859	0	0	0.0105411	0.0535305	0.00293219
Shadikongoro C	NA	NA	NA	NA	NA	NA	NA	NA	NA	NA	NA	NA	NA	NA	NA	NA	NA	NA	NA	0.00400377	0.00259602	0	0.00118117	0.000206765	0.00894197	8.92578e-05	0	0	7.28467e-06
Andara DH	NA	NA	NA	NA	NA	NA	NA	NA	NA	NA	NA	NA	NA	NA	NA	NA	NA	NA	NA	NA	0.000899041	0.000660801	0.00121216	0.00344742	0.000180209	0.00135555	0.00404593	0	0
Divundu C	NA	NA	NA	NA	NA	NA	NA	NA	NA	NA	NA	NA	NA	NA	NA	NA	NA	NA	NA	NA	NA	0	0.000851922	0.000262068	0.00153203	0.000576346	0.00631665	0.00233031	0
Mutjiku C	NA	NA	NA	NA	NA	NA	NA	NA	NA	NA	NA	NA	NA	NA	NA	NA	NA	NA	NA	NA	NA	NA	0.0019995	0	0.00400209	0.000377119	0	0	0
Old Bagani C	NA	NA	NA	NA	NA	NA	NA	NA	NA	NA	NA	NA	NA	NA	NA	NA	NA	NA	NA	NA	NA	NA	NA	0.000154039	0.00241738	0.000532174	0	0	0
Sesheke C	NA	NA	NA	NA	NA	NA	NA	NA	NA	NA	NA	NA	NA	NA	NA	NA	NA	NA	NA	NA	NA	NA	NA	NA	0.0435633	0.0287211	0.00535209	0.0575552	0.0090016
Choi C	NA	NA	NA	NA	NA	NA	NA	NA	NA	NA	NA	NA	NA	NA	NA	NA	NA	NA	NA	NA	NA	NA	NA	NA	NA	0.0316148	0.0474712	0.078401	0.0288845
Sibbinda HC	NA	NA	NA	NA	NA	NA	NA	NA	NA	NA	NA	NA	NA	NA	NA	NA	NA	NA	NA	NA	NA	NA	NA	NA	NA	NA	0.0031421	0.00174808	0.00176437
Chinchimani C	NA	NA	NA	NA	NA	NA	NA	NA	NA	NA	NA	NA	NA	NA	NA	NA	NA	NA	NA	NA	NA	NA	NA	NA	NA	NA	NA	0.030213	0
Kanono C	NA	NA	NA	NA	NA	NA	NA	NA	NA	NA	NA	NA	NA	NA	NA	NA	NA	NA	NA	NA	NA	NA	NA	NA	NA	NA	NA	NA	0.00251408
Kasheshe C	NA	NA	NA	NA	NA	NA	NA	NA	NA	NA	NA	NA	NA	NA	NA	NA	NA	NA	NA	NA	NA	NA	NA	NA	NA	NA	NA	NA	NA

## Sheet: Figure 3B and 3C
Facility Name	Region	Connectivity Score
		Within region	Between region
Rundu DH	Kavango East	0.05	0
Mutjiku C	Kavango East	0.09	0
Old Bagani C	Kavango East	0.14	0
Shadikongoro C	Kavango East	0.14	0
Kangongo C	Kavango East	0.18	0
Divundu C	Kavango East	0.23	0
Shinyungwe C	Kavango East	0.27	0
Mashare C	Kavango East	0.32	0
Ndama C	Kavango East	0.36	0
Katere C	Kavango East	0.41	0
Mbambi East C	Kavango East	0.41	0
Chinchimani C	Zambezi	0.6	0.05
Kanono C	Zambezi	0.2	0.09
Kasheshe C	Zambezi	0.6	0.09
Biro C	Kavango East	0.36	0.2
Kayengona C	Kavango East	0.41	0.2
Sauyemwa C	Kavango East	0.41	0.2
Ndonga Linenea C	Kavango East	0.45	0.2
Andara DH	Kavango East	0.5	0.2
Mabushe C	Kavango East	0.5	0.2
Nkarapamwe C	Kavango East	0.64	0.2
Sibbinda HC	Zambezi	0.6	0.27
Choi C	Zambezi	0.8	0.27
Sesheke C	Zambezi	0.8	0.32
Kaisosi C	Kavango East	0.41	0.4
Sambyu HC	Kavango East	0.68	0.6
Mayara C	Kavango East	0.45	0.8
Karukuta C	Kavango East	0.68	0.8
Nyangana DH	Kavango East	0.91	0.8
