# Supplementary material for: Using parasite genetic and human mobility data to infer local and cross-border malaria connectivity in Southern Africa
Source: eLife journal article supplement (doi:10.7554/elife.43510), 2019-04-01

### A. Mobile phone data

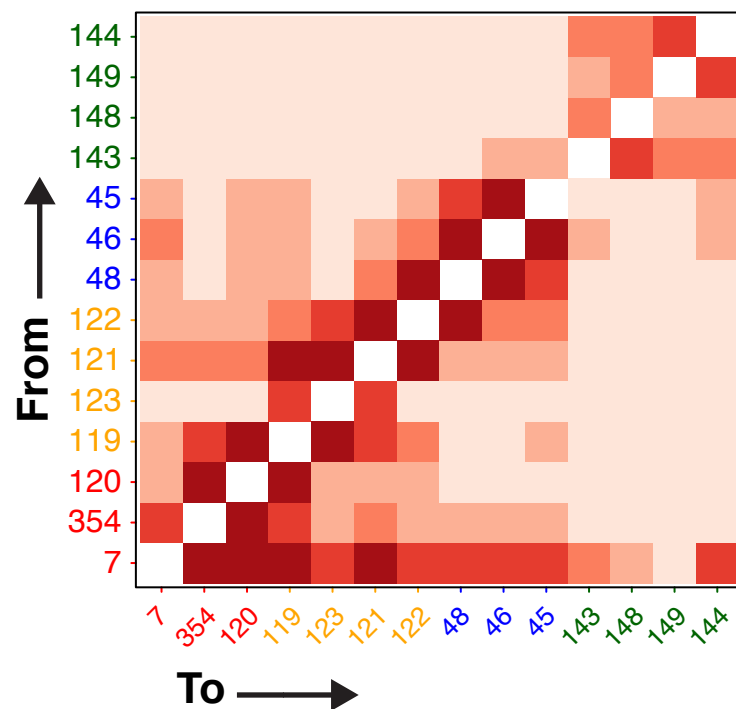

### B. Genetic data by cell towers

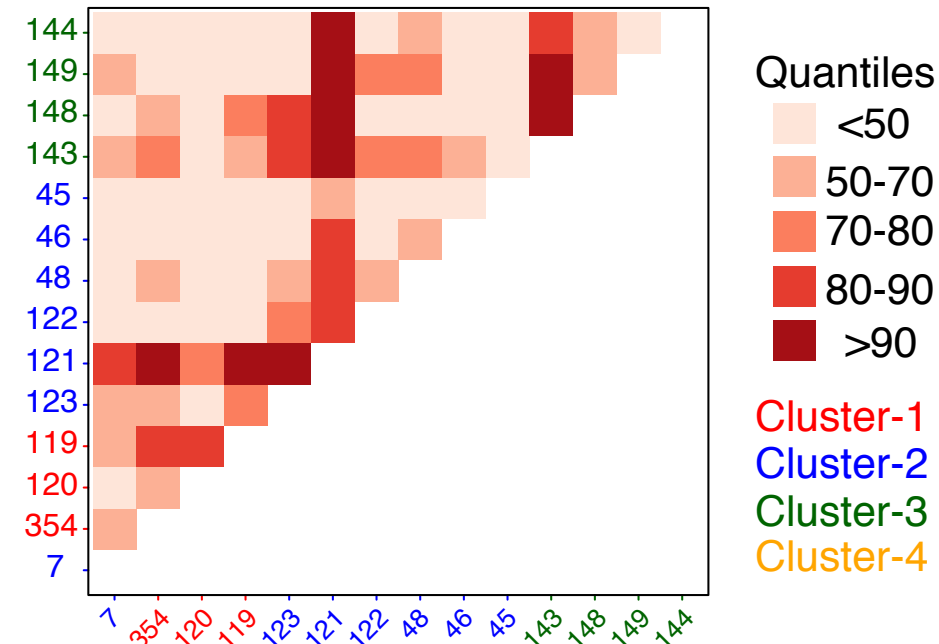

### C. Rand index by cell tower

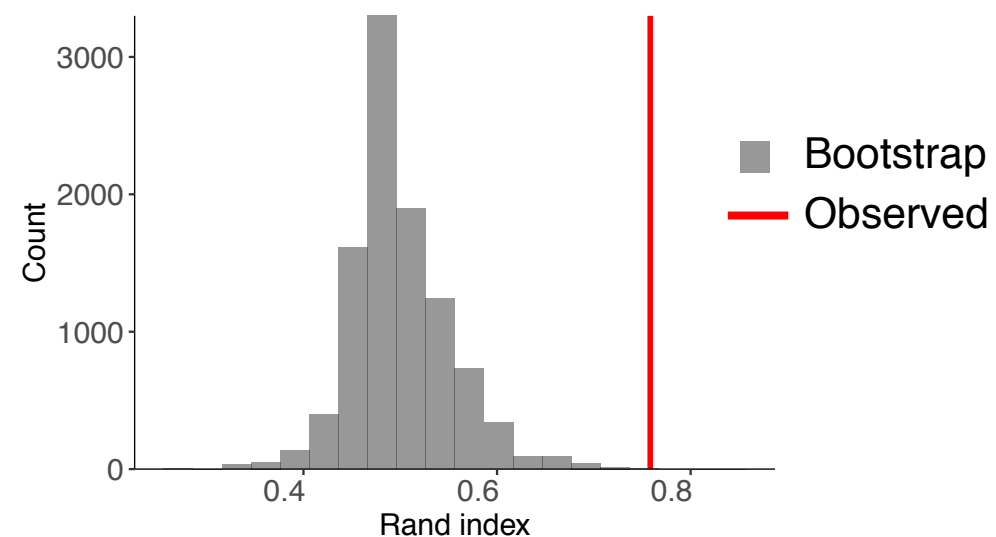

### D. Travel survey data

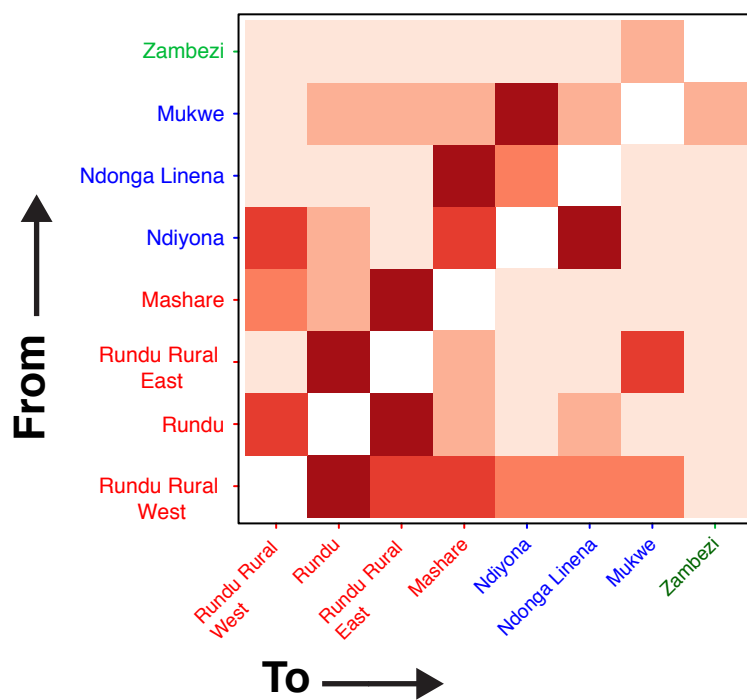

### E. Genetic data by destinations

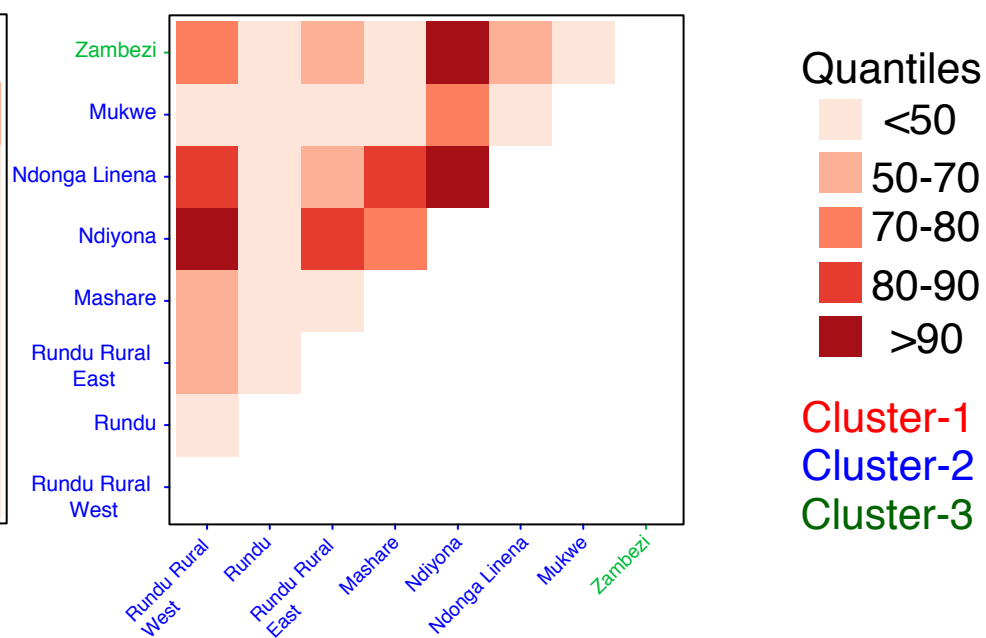

### F. Rand index by destinations

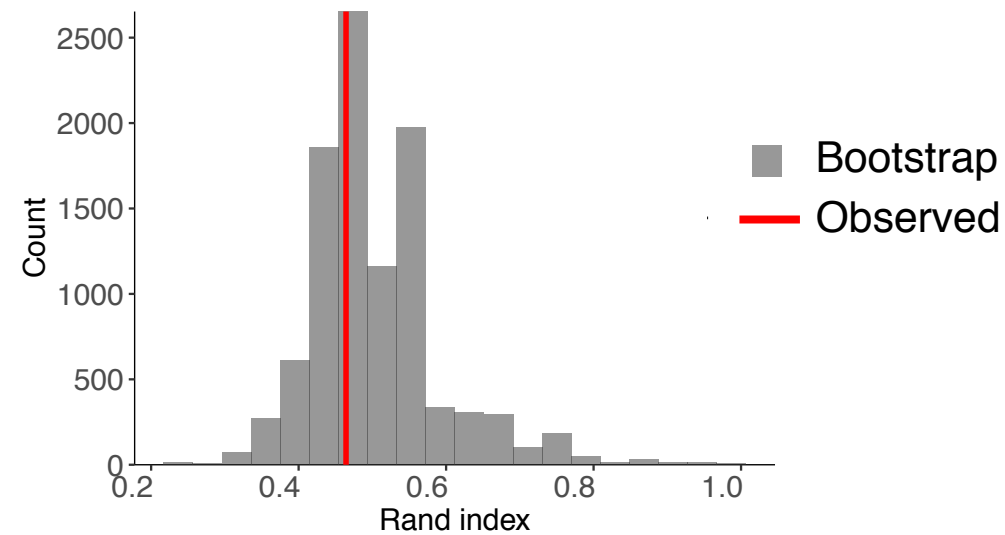

Supplement: supp [file elife-43510-supp-v1.zip › elife_poa_e43510_Figure_4_figure_supplement_2.pdf]
