# Supplementary material for: Using parasite genetic and human mobility data to infer local and cross-border malaria connectivity in Southern Africa
Source: eLife journal article supplement (doi:10.7554/elife.43510), 2019-04-01
Supplement: supp [file elife-43510-supp-v1.zip › elife_poa_e43510_Figure_4_source_data_1.xlsx]

## Sheet: Figure 4A
Mobile phone tower - human mobility data	1	2	3	4	5	6	7	8	9	10	11	12	13	14
1	0.855515	0.0015917	0.00468922	0.0031372	0.00328157	0.00199697	0.00505826	0.00388872	0.00012466	0.00047387	0.000895916	0.000309275	0.000219149	0.0139062
2	0.0292518	0.704247	0.164537	0.0211307	0.00153176	0.000494852	0.00338442	0.00600299	3.25e-05	0.00405026	0.000328957	0.000139562	9.74e-05	0.00166512
3	0.0336503	0.0655238	0.771694	0.064378	0.000804142	0.000834428	0.00379849	0.00637493	0.000117904	0.00136488	0.000852115	0.000420937	0.000737799	0.00156908
4	0.0305223	0.0102125	0.0844672	0.784105	0.00123038	0.000434368	0.00377136	0.0475952	5.68e-05	0.000610105	0.00018884	5.54e-05	2.3e-05	0.00183244
5	0.0647639	0.00209793	0.00197118	0.00149414	0.728374	0.055786	0.0608891	0.00887455	0.012171	8.62e-05	0.000192607	6.69e-06	0	0.0160309
6	0.0673061	0.00174627	0.00166536	0.00139107	0.0769076	0.628372	0.00827219	0.00235579	0.000315089	0.000187374	1.49e-06	0.000176768	4.68e-05	0.161285
7	0.0515509	0.000984257	0.00390758	0.0045938	0.0310531	0.00282952	0.757478	0.0805009	0.0158435	0.000508018	2.39e-05	0.000122468	1.07e-05	0.00696124
8	0.0418232	0.00251791	0.00840937	0.0421661	0.0059367	0.00144975	0.0859496	0.773335	0.000953208	0.000242612	3.48e-05	6.87e-05	7.77e-07	0.00304639
9	0.0103882	0	0	0	0.0730862	0.00386645	0.18192	0.0125841	0.718312	0	0	0	0	0.00172729
10	0.00619468	0.00122174	0.00380088	0.0012329	0.000657317	0.000192646	0.000312067	0.000329141	2.26e-05	0.806897	0.00728231	0.00808014	0.00342482	0.000187457
11	0.0352604	0.00183979	0.00236886	0.000226551	0.000324659	5.54e-05	0.000446	0.000239379	1.49e-06	0.00725359	0.669427	0.00382089	0.0230347	0.000506025
12	0.00210664	0.000119137	0.000545741	0.000306309	2.28e-05	1.34e-05	2.53e-05	0.000104684	3.42e-07	0.0102862	0.00508176	0.835501	0.00801299	2.63e-05
13	0.00119511	9.92e-05	0.000320886	0.000453943	1.06e-05	8.22e-06	7.22e-05	2.44e-05	4.71e-07	0.00506401	0.036024	0.00377162	0.771055	4.26e-05
14	0.135053	0.000439427	0.00133889	0.00128319	0.00944689	0.0521636	0.00489545	0.00321448	0.000262744	0.000578303	0.00010015	3.42e-05	0.000180989	0.740445
Mobile phone tower - parasite genetic data	7	354	120	119	123	121	122	48	46	45	143	148	149	144
7	NA	0.00366008	0.00056599	0.00380651	0.00218995	0.0128838	0.00060956	0.000755151	0.000155202	0.000142834	0.00349336	0.00139424	0.0021642	0.000299996
354	NA	NA	0.00531801	0.0141746	0.00534522	0.0196161	0.000642773	0.00399877	0.00122547	0.000382162	0.0073613	0.00524328	0.000901181	0
120	NA	NA	NA	0.0111108	0.000161714	0.00800388	0.000497942	0.000133557	0.000218379	0	0	0	0	0
119	NA	NA	NA	NA	0.0069142	0.0228576	0.00109366	0.000173098	6.2e-05	0	0.00446368	0.00549489	0	0
123	NA	NA	NA	NA	NA	0.0301302	0.00615922	0.00496434	0.000657067	0.000278074	0.0137445	0.0105077	0	5e-05
121	NA	NA	NA	NA	NA	NA	0.01792	0.0174583	0.0112617	0.00376288	0.0310541	0.0242551	0.0330203	0.0186097
122	NA	NA	NA	NA	NA	NA	NA	0.00187676	0.000608612	4.1e-05	0.00601414	0.000654909	0.00957885	0.000231481
48	NA	NA	NA	NA	NA	NA	NA	NA	0.00150686	0.000503652	0.00695207	0.000194018	0.00603736	0.00259015
46	NA	NA	NA	NA	NA	NA	NA	NA	NA	0.000969507	0.00196007	0.000880479	0.00058538	0
45	NA	NA	NA	NA	NA	NA	NA	NA	NA	NA	0.00065393	0.000518399	0	0
143	NA	NA	NA	NA	NA	NA	NA	NA	NA	NA	NA	0.0300043	0.0407846	0.0159804
148	NA	NA	NA	NA	NA	NA	NA	NA	NA	NA	NA	NA	0.00222643	0.00169183
149	NA	NA	NA	NA	NA	NA	NA	NA	NA	NA	NA	NA	NA	0.00105416
144	NA	NA	NA	NA	NA	NA	NA	NA	NA	NA	NA	NA	NA	NA

## Sheet: Figure 4B
Travel survey destination - human mobility data	RunduRuralW	RunduUrban	RunduRuralE	Mashare	Ndiyona	NdongaLinena	Mukwe	Zambezi
RunduRuralW	2	87.8548	18.2194	10.7112	3.48375	4	3.33059	1
RunduUrban	8	111.595	32.8556	1.98387	0	2.07196	1	0.014834
RunduRuralE	1	24.6316	213.725	1.306	0.868486	0	7	0
Mashare	4.1076	3.15645	26	378.338	1	1	1	0.0584542
Ndiyona	16	2	0	12	181.839	228.968	1	0
NdongaLinena	0	0.0296601	0.887097	49.871	4.13715	345.729	0	0
Mukwe	0	2.09435	2	2	109.954	1.50468	825.716	1.00645
Zambezi	0	0	0	0	0	0	2	235.44
Travel survey destinations - parasite genetic data	RunduRuralW	RunduUrban	RunduRuralE	Mashare	Ndiyona	NdongaLinena	Mukwe	Zambezi
RunduRuralW	NA	0.000987126	0.00509354	0.0045879	0.0170748	0.0105039	0.00126013	0.0102514
RunduUrban	NA	NA	0.00158242	0.00168717	0.00288753	0.000838833	0.000159812	0.000259913
RunduRuralE	NA	NA	NA	0.00362063	0.0106046	0.00444317	0.000600144	0.00530634
Mashare	NA	NA	NA	NA	0.0102583	0.0114507	0.000850059	0.00156082
Ndiyona	NA	NA	NA	NA	NA	0.018926	0.00930928	0.0182202
NdongaLinena	NA	NA	NA	NA	NA	NA	0.001483	0.00908194
Mukwe	NA	NA	NA	NA	NA	NA	NA	0.0030947
Zambezi	NA	NA	NA	NA	NA	NA	NA	NA
