# Supplementary material for: Using parasite genetic and human mobility data to infer local and cross-border malaria connectivity in Southern Africa
Source: eLife journal article supplement (doi:10.7554/elife.43510), 2019-04-01
Supplement: supp [file elife-43510-supp-v1.zip › elife_poa_e43510_Figure_5_source_data_1.xlsx]

## Sheet: Figure 5C and D
Cross-border Importation Estimates	Rundu (Namibia)	Nyangana (Namibia)	Andara (Namibia)	Zambezi (Namibia)	Northern Angola (Angola)	Southern Angola (Angola)	Calai (Angola)	Dirico (Angola)	Western Province (Zambia)	Southern Province (Zambia)
Rundu (Namibia)	NA	0.0028112	0.000282099	4.71971e-05	0	0.914713	2.6458	0.61595	0.420129	0
Nyangana (Namibia)	0.0173577	NA	0.0125203	0.00211815	0.000675282	0.296064	1.38705	4.73274	0.0997678	0.717806
Andara (Namibia)	0.000245873	0.00176735	NA	1.70778e-06	0	0.00654529	0.0239178	2.08493	0.10671	0.167058
Zambezi (Namibia)	0.0352615	0.256296	0.00146389	NA	0	0.757245	4.46962	44.9292	32.0396	10.0149
Northern Angola (Angola)	0	3.26836e-05	0	0	NA	0	0.00868978	0.00722861	0.00175439	0
Southern Angola (Angola)	0.000351453	1.84233e-05	2.88538e-06	3.89434e-07	0	NA	0.00586128	0.00542331	0.000322937	0.000816284
Calai (Angola)	0.00160113	0.000135945	1.66066e-05	3.6204e-06	1.75968e-05	0.00923166	NA	0.0281995	0.00106732	0.00171979
Dirico (Angola)	0.000341337	0.000424767	0.00132562	3.33258e-05	1.34044e-05	0.00782203	0.0258231	NA	0.0292456	0.0153052
Western Province (Zambia)	0.00213607	8.21528e-05	0.000622487	0.000218039	2.98479e-05	0.00427334	0.00896722	0.268321	NA	0.0243143
Southern Province (Zambia)	0	0.00175881	0.0028998	0.000202801	0	0.0321417	0.0429947	0.41784	0.0723502	NA
