# Supplementary material for: Using parasite genetic and human mobility data to infer local and cross-border malaria connectivity in Southern Africa
Source: eLife journal article supplement (doi:10.7554/elife.43510), 2019-04-01
Supplement: supp [file elife-43510-supp-v1.zip › elife_poa_e43510_Supplementary_File_1.xlsx]

## Sheet: MicrosatelliteData
Supplementary File 1: Parasite genotyping data for 2585 infections collected from Namibia.
ID	HealthFacility	HealthDistrict	Region	Country	AS1	AS2	AS3	AS32	AS7	AS8	AS11	AS12	AS14	AS15	AS19	AS21	AS34	AS25	B7M19	TA109	AS31	Ara2	PfPK2	TA1	TA87	TA81	TA60	PolyA	PFG377	TA40
531	Divundu C	Andara	Kavango	Namibia	176	198	164	242	171	198	168;156	162	215	122	179	157	187;184	132;129	155	180	197	139	179	174	94;106;103	118	215;221;218	152;164	103	286
533	Old Bagani C	Andara	Kavango	Namibia	176;173	195;192	164	242	171	198	162	165	212;215	122	179;182	157;160	184	129	164	168	197	130;139;143	173;179;176	165;171	106;119	121;128	209	158	103;100	268;271
544	Old Bagani C	Andara	Kavango	Namibia	173	198;195;192	167;161	242	171;174	201;198	162;156	162;165	212	134;122	179;182	157;160	184	101	164;155	155	200	130;152;143	173;152;170	205;174;181	106;103;97	121;128;125	215;209	185;143;197;152;161	103;100	262
548	Divundu C	Andara	Kavango	Namibia	176;173	198;195;192	173;167	242	165;171	204;201;198	162;159	162;165	206	137;128	179;182	157;160	184	139;110;101	164;155	165;168	203;206	149;143	179;176;185	174;181;177	94;103;116	128;125	205;218	152;149;161;158;155	103;107	274;277
549	Divundu C	Andara	Kavango	Namibia	173	189;192	170;167	227;258	171	201;198	162;165	162;165	206	134	179	160;154	187	113;101;116	155	168;155	200	146;158	176;197	174;190;181	113;103	137	212	149	113;103	286
550	Divundu C	Andara	Kavango	Namibia	176;173;185	198;192	170;161;164	258;242	171	201;198	168;162;156	165	206;197;215;209	134;131;125;122	182;167	157;154	187;184	123;94;110;113;120;104;116	164;155	152;155	197;200;209	152;139;146	206;155;179;185;197;215;158	165;184;177;171	106;113;103	118;134;128	215;212;209	149;158	103;107;100	286;238;271;253
554	Old Bagani C	Andara	Kavango	Namibia	176	198;192	164	273	174	201	162	165	206	143;122	182	157	187	120	155	155	218	130;143	170	184	100	125	212	164	107;100	265
572	Divundu C	Andara	Kavango	Namibia	173;185	198;195;192	170;161	242	171	201;198	168;162	162;165	212;206;221;218;209	131;128	179;182;167	157;154	187;184	123;107;110;113;120;101;116	164;155	152;177;155	197;200;191;209	152;139	206;173;152;185;215	165;184;177	110;106;113	134;121;128	215;212;209;218	170;167;152;149;161;158	113;103;107	286;268;271;253
573	Divundu C	Andara	Kavango	Namibia	173;185	195;192	170;164	242	171	201;198	168;162	165	206;209	131	182;167	157	187;184	123;110;113;120	164;155	152;155	197;200;209	152	179;185;215	184;177;171	106;113	134;128	215;212;209	149;158	103;107	286;271;253
577	Old Bagani C	Andara	Kavango	Namibia	176;173	198;189;195;192	170;167;161	242	174	201;198	162;165;156;159	162;165	212;206	134;131;119;122	179;182	157;160	184	110;120;101	164;155	152;177;165;168;155	218;197;200	130;152;136;143	173;152;179;191;170	205;174;143;181;150	110;106;113;103;97	118;121;128;115;137;125	215;209	185;143;197;152;161	103;107;100	268;262
578	Old Bagani C	Andara	Kavango	Namibia	176;173	202;189;195;192	170	227;258	171;174	201;198	162;165	162;165	212;206;215;209	128;125	179;182	157	187	110;113;120	164;155	152;168;155	215;209	136;143;146	152;179;176;197;170	174;190;181	100;106;113;103	134;121;128;115	212;209;218	143;170;167;161;164	103;107	253
591	Old Bagani C	Andara	Kavango	Namibia	173	189	170	227	174	198	165	165	215	125	179	157;160	184	110	164	152	200	152;136	179;170	205;181	100	134	215	170	103;107	286
592	Old Bagani C	Andara	Kavango	Namibia	179;173	192	176;164	242;273	171	198	162	165	215	128	179;182	157;154	184	107;98;110;101	164;155	168	197	139;146	173;200;191;203	171	110;100	121;131	209	143;146	100	247
595	Divundu C	Andara	Kavango	Namibia	173	189	173	258	171	204	156	165	212	128	179	157	184	94;91	155	152	206	146	155;152	184	113	121	221	155	100	268
596	Divundu C	Andara	Kavango	Namibia	173;185	202;195;192	167;164	242	171	198	168;162;165;156	168;165	212;206;221;209	131	179;182;167	157;160;154	187;184	123;129;110;113;120;101	164;155	152;165;155	194;197;200;209	152;136;139	173;152;179;185;170;215	184;177;171	94;110;133;106;113	134;121;128	215;212;209	170;152;149;161;158;164	103;107;100	286;268;271;253
597	Divundu C	Andara	Kavango	Namibia	173	202	167	242	171	198	162	165	221	122	179	154	187	98;101	164	165	197	139	173	171	133;113	128	218	170	107	274
598	Divundu C	Andara	Kavango	Namibia	176	198;189;195;192	176	227	171;174	198	162;156	165	212	122	179;182;167	157;160	184	94;98;101	146;155	152	200	152;139	155;197	171	119	121;128;125	221;209	161;158;164	103;107;100	277
599	Divundu C	Andara	Kavango	Namibia	179;176;173	195;192	167;185	227;258	171;177	201;198	162;156;159	162;165	206;215	122	179;182	157;160	187;184	110;113	164;155	152;165;168	194	149;143;158	173;176	174;177;171	110;113;103;116;97	121;112;131;125	199;221;212;218;202	136;140;158;155	103;107	247;265
600	Old Bagani C	Andara	Kavango	Namibia	173	202;192	167;164	242	171;174	201;198	162;165	165	212;215	131;128	179;182	157	187	120;101	155	165	197	136;149	173;179;200;191;170	190	100;106	121	212;218	164	103;107	292;265
601	Old Bagani C	Andara	Kavango	Namibia	173	195	176	258	174	219;201	162	162	209	128	179	157;160	187	129	155	177	215;218	136	170;182	184	91	131	218	152	103	274
614	Old Bagani C	Andara	Kavango	Namibia	173	202	164	273	171	201	162	165	215	128	182	160	187	120	155	168	215	136	170	190	100	121	212	164	103	265
617	Divundu C	Andara	Kavango	Namibia	176;173	195;192	176	242	171	201;198	165;156	165	215	125;122	179;182	157	187	98;101	155	165	200	139	179;176	177	113	125	212	158;155	103;107;100	235;238
618	Divundu C	Andara	Kavango	Namibia	173	189;195;192	170;158	258;242	171;174	201;198	162;156;159	165	215	131;128;122	179;182;167	157	187;184	94;110;113;120;101;116	164;172;155	152;165;168;155	197;206;209	152;139;133	155;179;200;197;158	177	100;113;97	121;128;125	209;205	143;140;149;158;155	107;100	283
734	Old Bagani C	Andara	Kavango	Namibia	173	192	170;167	227	171;174	198	162	162	206	134;131;128;125	179;182	157	187;184	110;101	155	168	200;203	139	173;194	140	113	134;128	215;212	158;155;164	103;107;100	268;271;253
1043	Andara DH	Andara	Kavango	Namibia	176	192	161	242	171	201	162	165	209	134	182	160	187	101	155	152	215	139	209	190;187	110	131	212	161	103	256
1045	Andara DH	Andara	Kavango	Namibia	173	192	173	258	179;171	198	156	165	212;215	119;128;125	160;182	160	187	126;82;129;91;120;101	164;155	162	200	143;146	179;176;182	171	100;103;116;97	128;125	218	161	103;100	244;283;229;247
1046	Andara DH	Andara	Kavango	Namibia	173	189	161	227	174	201	162	165	206	122	182	190;184	184	101	143;140	155	203	155	188;191	190	113	131	205	167	103;100	244;247
1048	Andara DH	Andara	Kavango	Namibia	176;173	195	158	261	174	201	162;165;159	162;165	197	140;125	179	160	187	101	155	168	162;194;197	130;146	176	171	106;113;103	134;128	212;205	176;161	107;100	244;247;265
1049	Andara DH	Andara	Kavango	Namibia	173	192	170;167	242	171	198	153;150	165	221;197;215	131	182	157	187	120	155	152	197	139	173;170	140	110	121;128	209	176	103	265
1052	Andara DH	Andara	Kavango	Namibia	179	192	167	242	174	201	162	165	197	140	182	157	187	113	155	168	197	146	173	196	106	128	212	182	100;97	274
1056	Andara DH	Andara	Kavango	Namibia	176;173	192	161	242	171;174	198	159	162;165	212;206;209	137;128	179;182	157;160	187;184	139;110;113	164	152	197;206;209	139	164;191;194	168;187	106;113;103	121;128	209	170;173;176	113;100	247
1058	Andara DH	Andara	Kavango	Namibia	173;164	195	170;167;161	276;242;245	171	201	162;165;159	165	206;209	134;125;122	182	157	187	107;110	155	152;168	218;197;200	152;133;146	179;176;170;182	174;165;181;177;171;150;196	116	128	212;209;205	161;158;155	107;100	277;247
1060	Andara DH	Andara	Kavango	Namibia	173	189;195;192	161;158	258;242	171	201;198	174;162;165	165	212;206;221;197;203	125;122	179	166;163;169	187	107;98;110;120;101	143;134;140;149;158;146	152;177;168	197;200;191	155	170;182	165;177;171	110;106;122	134;121;131;125	221;212;209;205;218;224	136;191;194;173;167;179;149;176	100	271;274;250;247;253;256
1062	Andara DH	Andara	Kavango	Namibia	173	195	167	242	174	198	162	165	212	125	179	160	187	107	155	152	197	133	182	171	106	125	212	176	100	247
1065	Andara DH	Andara	Kavango	Namibia	176;173	202;189;195;192	161;179	227;242	171	201;198	162;165;156	162;165	212;206	134;128;125;122	179;182;167	157;160	184	110;91;120;101	164;172;155	152;177;165;168	197;200;203;206	136;139;149;143;146	179;200;191;170	190;168;165;187;184;171	94;110;85;100;88;103;97;91	121;128;125	215;221;209;205	200;170;179;176;182;161;158	107;100	286;262;265
1066	Andara DH	Andara	Kavango	Namibia	173	192	176	227	171	198	162;159	162	206	122	157;167	157	187	110	155	165	162;197;200	143	191;194	171	103	128;131	221	170;167;164	107	235;238;241
1067	Andara DH	Andara	Kavango	Namibia	182	189	167	227	171	201	165	165	215	128	182	157	187	113	164	155	197	143	200	181	113	134	215	161	100	271
1070	Andara DH	Andara	Kavango	Namibia	173	192	173	242	171	201	156	162	212	128	182	160	187	110	164	155	203	146	173	174	110	121	209	158;155	103	262
1071	Andara DH	Andara	Kavango	Namibia	179	195	179	242	171	198	162	162;165	212	140	167	157	184	101	164;172;155	155	200;203	146	170	137;184	94;100;97	121;125	218	161;158	100	268
1074	Andara DH	Andara	Kavango	Namibia	164	195	173	242	171	198	162;159	165	212;206	112	160;179	160	184	101	155	177	162;200;203	139	173;170	177	125;106	134	205	170	97	262
1075	Andara DH	Andara	Kavango	Namibia	173;164	202;195;192	173;167;161	227;242	171;174	201;198	165	165	212;206;215	122	170;179	160	187;184	107;91;120;101;116	164;172;155	152;177;165	197;203;191	133;149;143;146	173;179;176;191;194;197;170;182;203	137;177;171	106;103;97	118;134;128;131;125	215;212;209;205	176;161;158	113;107;100;97	244;268;271;262;250;247;256
1077	Andara DH	Andara	Kavango	Namibia	173	192	188	227	171	198	165	165	212	122	179	160	187	116	172	180	212	136	188;191	165;162	106	128	215	158	103	268
1078	Andara DH	Andara	Kavango	Namibia	173	198	173	258	171	198	162	165	215	128	179	157	184	104	155	177	203	139	173;170	184;177	97	128	221	164	103	265
1083	Andara DH	Andara	Kavango	Namibia	173	192	164	242	174	201;198	162;156	165	212;197	131;128	179	160	187	110	155	152;165	215;197	152	176;194;197	184;177	110	121;128	209;218	158	103;100;97	292;280
1086	Andara DH	Andara	Kavango	Namibia	173	195;192	161;158	242	171	201	162;165	165	206	119;125	179;182	166;169	187	123;110;113;120	143;140;149;146	152	203	155	182	177	113;119;88;91	115	215;221;218	191;200;197;194;170;179;182;161;164	103	286;268;271;250;253
1087	Andara DH	Andara	Kavango	Namibia	176;173	189;195	170;161	276	171	201;198	162;159	162	206;209	134;122	182	157	187;184	110;101	164;155	165;168	215;159;218;197	152;146	179;176;170	174;168;150;199	100;116	128	205;218	136;179;149;161;158;155	103;107	277;253;259
1089	Andara DH	Andara	Kavango	Namibia	176;173	189;195	167	242	171	201;198	162	162;165	224;206;227;209	134;137	170;157;182	157	190;187	129;101	155	152;155	200;203	139;146	173;152;170;182;203	181	94;110;103	121	215	136;185;146;194;167;149;182;155	103	268;253
1090	Andara DH	Andara	Kavango	Namibia	176;173	195	164;158	242	171	201;198	162;165	165	224;212;221;215	125	179;182	157;160	187	82;107;110;91;101	155	165;168	194;197	136;146	179	181;184	94;106;91	121;128	209	161	107	256
1091	Andara DH	Andara	Kavango	Namibia	176;173	187;198;195;192	158	227;242	171;174	201;198	168;162;156;159	165	212;206;203;215;209	134;131;128;125;122	179;182	166;160;175;178;169	190;187;184	129;113;120;104;101	143;134;140;137;146	152;177;165;168;155	215;197;200;203;206;212	136;146;155	173;179;176;185;170;182	174;181;171	110;100;106;113;119;91	134;121;128;115;131;125	221;212;209;205	143;170;167;152;161;158;155;164	103;107;100;110	268;274;277;262;250;247;253;265;256;259
1094	Andara DH	Andara	Kavango	Namibia	173	198;195;192	167;176	258;242	171	201;198	162;156	165	212;221	125;122	179	157	187;184	129;120	164;155	165;168	162;200	136;139;146	176;170	171	110;100;106;103	115;131	209	136;143;146;149	103;107	262
1095	Andara DH	Andara	Kavango	Namibia	173	192	167	242	174	201	162	165	212	134	179	157	184	110;120;116	164	168	200	146	188;191	184	103	128	215	167	103;107	286
1096	Andara DH	Andara	Kavango	Namibia	176;173	198;189;204	173;167;176	258;242	171	201;198	162;165	162;165	212;206;215	131;128	179;182	157	187;184	110;101	164;155	171;177;168;155	194;200;203	136;139;149;143	209;179;176;188;200;197	174;181;184	110;88	121;131;125	209;218	170;179;182;161;158	103;100;97	286;268;274;262;247;259
1097	Andara DH	Andara	Kavango	Namibia	173	189	173	242	171	198	162	165	215	128	179	157	187	110	155	171;168	194	149	179	174	110	131	218	182	97	247
1100	Andara DH	Andara	Kavango	Namibia	176;173	195;192	164	258	171	201	162	165	206	140	179	157;160	187	120	155	180	197	152;143	194	171	97	125	218	158;155	103;100	274
1101	Andara DH	Andara	Kavango	Namibia	176;173	198;192	167;176;161	242	171	201;198	162	155;162	206	125	179	157	187;184	88;107;91	155	152	224;200	136;143	173	165	100;106	121;128	205;218	146;170;167;161;164	107;100	271
1103	Andara DH	Andara	Kavango	Namibia	173	192	167	258	171	201	165	165	209	122	179	157	187	110	155	155	194	158	176	168	82;116;91	131	209	149	107	253
1104	Andara DH	Andara	Kavango	Namibia	173	198	182	227	174	204	162	162;165	212	128	179	160	184	110	155	177;165	200	133	194	187;184	110;113;116	131	215	167;164	113;103;110	256
1105	Andara DH	Andara	Kavango	Namibia	173	192	170	227	171	198	153;150	165	221	131	182	157	187	120	155	152	197	139	179	187;140	110	121	209	176	100	271
1106	Andara DH	Andara	Kavango	Namibia	173	189	167	227;258	171;174	201;198	162	162;165	212;197;203	128	179;167	157	187	88;94;91;101	155	171;158;177;165	200	139;158	176;185	177;162	103;91	128;115	221;218	146;173;149;161;158	103;100	268;259
1109	Andara DH	Andara	Kavango	Namibia	176	195	158	242	179;171	198	162	168;165	212	122	182	160	187;184	94;98;91;101	155	152;165	200;191	146	179;176;185;182	168;184;177;171	106;113;116;91	115;137	209	161;158;164	103;107	268
1110	Andara DH	Andara	Kavango	Namibia	176;173	187;198;195;192	170;167;176;164	227;242	171;174	198	168;162;165;156	165	212;206;215;209	131;128;125	179;167	157;160	190;187;184	110;120;101	164;155	152;165;155	194;197;200;206	152;136;139;146	173;179;176;197;170;182;215	168;187;171	94;110;100;106;119;91	134;121;128;131	221;209;205;218	170;167;149;161;158;155;164	103;107;100	244;271;250;247;256;259
1111	Andara DH	Andara	Kavango	Namibia	173	192	173	242	174	198	162	165	206	137;128	179	157;160	184	139;110	164;155	168	203	143	176	184;177	100;103	128;125	205;218	152;149;155	103;107	268;277;256
1112	Andara DH	Andara	Kavango	Namibia	173	195	164	242	171	201	162;159	165	212	137	179	157	187	110	155	152	162;200	136	179;176	187	119	121	209	161	103;107	256
1291	Divundu C	Andara	Kavango	Namibia	173	198;189;195	170;173	227;242	171	201;198	162;165	168;165	212;221;215	116;131;119;128;125;122	160;157;167	157;154	187;184	123;88;94;82;107;98;110;91;120;104;101;116;85	155	180;177;165;168	194;197;203;209	136;139;143	173;152;176;200;185;197;170;203;221	190;168;165;187;184	94;110;100;116	121;128;125	215;221;205;218;224	170;167;158;155	103;107;100	268;271
1292	Divundu C	Andara	Kavango	Namibia	173	195	173	242	171	201	162	168	212	128	167	160	187	110;120	155	177	209	139	173	184	116	128	221	143;146;170;173;167;152	103;100	280
1294	Divundu C	Andara	Kavango	Namibia	173	198;189;195;192	164	242	171	198	162;165	168;162;165	212;206	122	179;167	157	187;184	110;120;101	155	158;177	197;209	139;158	173;152;164;179;191;170;182;203	184;171;162	106;103;116	128;131;125	215;221;209;205	170;173;167;179;161;164	103;107	238;250
1308	Divundu C	Andara	Kavango	Namibia	173	192	164	242	171	198	162	162	206	137	179	157	187	110	155	180	212	136	182	162	106	131	209	161	103	238
1309	Divundu C	Andara	Kavango	Namibia	173	192	167	221	171;196	201	156	165	212;206;221;215	128;122	182	157	187;184	101	155	168	194;191	136	173;176;194;197	187;184	100;106;103;97	121;128	215;212;209	161;158;155	103;100	268
1310	Divundu C	Andara	Kavango	Namibia	173	195	173;182	227;242	171	201;198	162	171;168;165	212;206;203;215	134;119;128	182;167	160	187	110;120	164;155	152;177;165	194;197;200;209	139;146	209;173;152;188;191;170	187;184;171	110;100;106;113;119;116	140;125	221;218	170;152;161	103;100	286;262
1311	Divundu C	Andara	Kavango	Namibia	173	198;195	173;185	242	171	204;201;198	162;165;156	168;165	212;215	134;128;122	182;167	157;160	187;184	132;120;101;116	164;155	152;177;165	194;209	136;139	206;173;152;185	181;184;171;140	94;122;116;97	121;128	221;218	170;164	103	268
1315	Divundu C	Andara	Kavango	Namibia	173	198;195;192	170;173;167	227;242;221	171	201;198	162;156	168;162;165	212;206;221	128;122	182;167	157;160;154	187;184	126;110;120;101	164;155	152;180;177;165;168	194;200;206;209;212	136;139;143;146	173;152;179;176;197	174;165;187;181;184;171;162	94;110;100;106;113;119;103;116	134;121;128;131;125	215;221;212;209;205;218	170;173;167;152;161;158;155;164	103;100	268
1317	Divundu C	Andara	Kavango	Namibia	176;173	202;189;195;192	173;164;158	242	171	201;198	162	162;165	212;206;197;209	137;128;122	179;167	157;160	187	88;110;91;120;101	155	152;180;177;165;168	194;197;200;203;209;212	136;139;146	173;164;179;191;170;182	174;162	110;106;116	121;128;131;125	209;205	161	103;107;100;110;97	235;238
1332	Divundu C	Andara	Kavango	Namibia	173	195	170;167	258;242	171;174	201	156	165	212;209	131;122	179;182	157	187	101	172;155	152;168	200	136;139	176;197;170	165;187	100	125	209;205;230	152	103;107;100	250
1334	Divundu C	Andara	Kavango	Namibia	173	198;189;195;192	170;173;167	227;242;221	171	204;201;198	162;156	168	212;206;221;215	137;131;119;128;125;122	179;182;167	157;160	187;184	110;113;120;101	155	152;177;165;168	194;197;200;203;206;209;212	152;136;139;149;143	173;179;176;191;197	165;187;181;184;177;171;162	100;106;103;116;97	121;128;112;125	215;221;212;209;205;218	170;161;158;155;164	113;103;100	235;268;271;250;253
1339	Divundu C	Andara	Kavango	Namibia	173	208;195;192	170;173;161	242;248;245	171	204;201;198	171;156	162;165	212;197;209	134;137;131;125	179;182;167	157;160;154	187;184	82;98;110;91;120;104;101	164;172;155	168;155	194;200;203;209	152;136;139;146	155;179;176;212;188;200;191;197	168;165;171	94;100;113;103	118;131;125	215;218;224	158	103;100	235;238;220;217;250;265
1340	Divundu C	Andara	Kavango	Namibia	173	208;192	161;158	248	171	198	156	165	209	134	179	169	187	101	140;137;146	155	203	155	179	171	82;113	131	218	152;158;155	103;100;97	235;238
1341	Divundu C	Andara	Kavango	Namibia	173	195	170;167	242	171;174	201;198	162;156	168;162	212;206	131;128;125;122	179;182	157	187;184	110;101	172;155	152;168	221;218;194;200;203;206;209	136;139;149;155	179;176;197;170	165;187;184;171	110;100;106;103;97	121;128;125	209;205;218;230	167;152;161;158;155	103;107;100;97	268;262;250
1356	Divundu C	Andara	Kavango	Namibia	173	198;189;192	161	258	171	201	156	165	206;197	125	167	154	184	123;113;120;116	164;155	155	197;209	146	155;197	165;184	100;103	118	215	158	103;100	235;238
1357	Divundu C	Andara	Kavango	Namibia	173	198;195;192	170	258;242	171	198	162;165;156	165	212;206;215	119;128;125	179;167	157;160	187;184	91;104;101	146;155	152	197;200	136;139	173;179;176;200;191;194;197;170	181;184;171	110;100;116	134;121;125	212;209	170;167;152;149;161;158;164	113;103;107;100	262
1363	Divundu C	Andara	Kavango	Namibia	176;173	198;195;192	167	258;242	171;174	201;198	156	165	206;197	131;125	179	160	187;184	110;101	164;155	152;155	197	133;146	173;179;185;182	171	100	121;125	212;209;218	170;152	103;107	274;256
1377	Divundu C	Andara	Kavango	Namibia	173	195	164	227	171	204	168;162;165	162	212	128;125	179	160	187;184	120	164	152	206	136	197	174	106	121	218	176	103;100;97	283
1389	Kangongo C	Andara	Kavango	Namibia	173	189	173	245	171	198	162	162	212	131	157;182	157	184	120	164	152	200	136	191;194	171	110	118	215	170	103	268
1392	Kangongo C	Andara	Kavango	Namibia	176	195	176	245	171	201;198	165	165	212	125	182	157	184	129	164;137;146;155	152;165	197	166	185;182	187;181	116	118	218	158	103	268
1394	Kangongo C	Andara	Kavango	Namibia	176;173	195;192	170;161;164	242	171	219;198	162	162;165	212;206	134;140;122	179;167	157;160;154	187;184	98;120;101;116	164;155	152;155	194;200;206	143;146	209;179;200	174;187	94;100	128	218;196	170;167;161;164	103;100	268;271;274;262;253;265;259
1395	Kangongo C	Andara	Kavango	Namibia	173	198	167	258	174	201	156	165	197	128	179	160	184	110	155	168	156;197	152	200;197	168	110	128	209	173	103;100	292
1411	Kangongo C	Andara	Kavango	Namibia	179;173	192	176;164	242;245;273	171	198	168;165	165	212;221	128;125;122	179;176	146;157;154	184	129;91;116	164;137;146;155	165;168	197	139	206;185;182;203	187;171	110;119	118;131	212;218;196	146;164	103;100	268;250;253
1413	Kangongo C	Andara	Kavango	Namibia	173	195	170	276	179;171	198	156;159	162	206	122	182	157	187;184	101	164	168	215;221;159;218	152	179;176;182	174;187;171	82;113;119;116;91	128;125	205;202	136;158;155	103;107	253
1417	Kangongo C	Andara	Kavango	Namibia	176;173	198;195	167;179;185	227;242	171	198	162;165;159	162;165	206;215	134;140;128	170;185	157;160	187	129;101	164;155	152;165;168	200;203	152;139	206;173;152;185;182;203	205;181;156	100;103;116	121;131	221;209;205;218	136;185;143;146;194;149;182;158	103	268
1433	Kangongo C	Andara	Kavango	Namibia	173	192	167	242	171	204	159	162	221	122	179	157	187	123	164	152	206	136	188;185	174	113	128	224	173	97	271
1435	Kangongo C	Andara	Kavango	Namibia	173	189	167	242	174;185	201	162	162;159	215	122	179	157	184	94;91	164	168	203;206	133	185;182	184	110;113	128	215	161;164	103;107	238
1436	Kangongo C	Andara	Kavango	Namibia	173	198	161	258	171	201	159	165	206	140	179	157	184	110	164	158;162	215	155	200;197	187	100	121	218	161	107	253
1437	Kangongo C	Andara	Kavango	Namibia	176;173	189;204	170;167	258	171;174	201;198	162;165	162;165	206	131;128	179	157;160	187;184	110;113	155	177	200;203	136	173;176	181;184;177	133;116	118;121	212;209	185;182;158	100;110	244;274;262;247;259
1438	Kangongo C	Andara	Kavango	Namibia	179;173	192	176	273	171	198	168	165	221;215	122	179	157	184;181	110;113;116	164;155	168	197;203	139	203	171	82;110	131	193;196	143;146;149	100;97	268
1457	Kangongo C	Andara	Kavango	Namibia	173	187;195	176;179	227;242	171	201;198	162;165	162;165	206;215	128;122	182;167	157;160	187;184	123;132;129;110;120	164;155	152;168	197	136;139	179;182	174;171	100;119;103;116	128;115;125	209	170;161;158;164	103;100;110	283;271;265
1459	Kangongo C	Andara	Kavango	Namibia	173	189	167	242	174	201	162	162	215	122	179	157	184	110	155	168	206	133	185	184	113	128	215	167;161;164	103	271
1462	Kangongo C	Andara	Kavango	Namibia	173	198;189	173	258	171	198	162	162	212	140;122	179	157	187	110;120	155	189	212	133;149	179;200;182;203	174	91	125	212	176	103;100	271;253
1463	Kangongo C	Andara	Kavango	Namibia	176;173	195;192	173;158	258;242	171;177	201;198	162;165	168;162;159	212;206	128;122	179	157	187;184	129;110;120;101	181;146;155	180;177;155	197;203;206;209;212	139;143;146	173;179;176;191	187;184;177	125;122;103	115	221;205	146;170;167;161;164	103;100;110	271;247;253
1472	Kangongo C	Andara	Kavango	Namibia	179;176;173	202;198;195;192;204	167;176;185	227;258;242	171;174	201;198	168;162;165;159	168;162	212;206;221;218;215	134;131;128;122	185;179;182	157;160;154	187;184	107;98;129;110;120;101;116	164;155	152;180;177;165;168;155	194;197;200;203;209	152;136;139	179;176;170;182	190;168;184;171	110;103;116	118;121;128;131;125	215;221;218;196	146;173;176;182;161;164	94;103;100	289;274;277;262;250;247;265
1473	Kangongo C	Andara	Kavango	Namibia	173	195;204	170;167	242	174	201;198	162;165	162;165	206;197	137;131;128	179	157;160	184	110;120	164;155	180;177;165;168	197;200;165	136;146	179;176;188;185	190	119;116	118;121	215;209;205;218	176;161;158;164	103;100	223
1474	Kangongo C	Andara	Kavango	Namibia	176	195	167	242	171;174	219	162	165	212	128;125	157;182	157;154	184	82;107;110;91;101	164	177	215;221;218	139;143	173;176	184	100;103	128;131	218	155	103;100	253;256
1490	Kangongo C	Andara	Kavango	Namibia	176;173	189	167;164	242	171	198	162	162;165	224;206;227;209	134;137;128;125	170;157;182	157	190;187	129;110;120;101	155	152;155	200;203	139;146	173;152;170;182;203	181	110;103	118	215;209;205	136;146;149	103	268;250;253;265
1491	Kangongo C	Andara	Kavango	Namibia	173	198;204	167;164	258	174	201	162	162	206	128	157;179	157	184	82;107;110;101	155	177	197;203	139;133	173;179;176;182	184	116	118;121;128	209	161	100;97	268;274
1492	Kangongo C	Andara	Kavango	Namibia	173	202;204	167	242	171;174	201	162;165	168;162	212;206	128	179	154	187;184	110;101	164;155	177	200;203;209	136;139	179;176	184	116	121;128;131	221;209;205	161;158	103	268
1495	Kangongo C	Andara	Kavango	Namibia	176;173	198;195;192	167;176	242	179;171;174	201;198	162	162	206;209	134;140;131;125	179;154	157;154	187	88;94;82;98;91;101;85	155	152	200	136;133	179;176;182;158	171	100;103;97	121;128;131;125	215;218	179;158;155	103;107;100	271;250;253
1496	Kangongo C	Andara	Kavango	Namibia	176;173	198;189;195	161;158	227;242	174	201;198	162;165;159	162;165	212;206;227;221	134;128;125;122	185;179;182;167	166;175;184;169	187	91;120;101	143;134;149;137;152	168	194;200;203	155	179;197;182;203	181;171	94;100;113;116	121;128;131;125	215;221;205;218	170;173;152;179;182;161;164	103;107;100;97	268;271;274
1513	Kangongo C	Andara	Kavango	Namibia	173	189	185	227	171	198	174	165	212	137	179	157	187	94;91	155	165	194	143	191	171	125	128	215	167	103	271
1516	Kangongo C	Andara	Kavango	Namibia	176;173	202;195;192	170;167;176;185	227;242	171;174	201;198	162;165;159	162;165	212;206;218;215;209	134;128;125;122	185;179;182;176	157;160	187;184	129;110;91;101	164;137;146;155	152;165;168;155	197;200;203;206	152;139;143	206;176;191;185;197;170	168;187;181;184	100;113;119;103;116	118;128;131;125	209;205;218	173;182;158	100;110	268;262;250;247;253;265
1517	Kangongo C	Andara	Kavango	Namibia	176;173	198;195;192	170;167;176;164	227;242	171;174	201;198	162;165	162;165	212;218;209	125;122	179;182;176	157;154	187;184	129;110;91;101	164;137;146;155	152;165;155	197;206;212	139;143	206;176;191;185;197;170;182	187;181;184	94;110;106;119;116	118;131;125	215;209;218	173;176;158;155;164	103;100	244;235;268;262;250;247;253;265
1518	Kangongo C	Andara	Kavango	Namibia	173	198;195;192	170;167;176;161	227;242	171;174	204;201;198	162;165	162;165	212;206;215	134;119;128;125;122	179;182;176	157;154	187;184;193	94;129;110;91;101	164;146;155	152;165;155	194;203;206;209;212	136;139;143	173;179;176;191;185;170;182;167	174;181;177;171	94;113	118;134;128;131;125	215;221;212;218	115;173;167;152;149;161;158;155;164	103;100	244;268;283;280;262;250;247;253;265
1536	Kangongo C	Andara	Kavango	Namibia	173	198;195;192	173;167;164	242	171	198	162;156	162;165	212;206;209	122	179;182	157	184	110;91;101	164;155	165;155	197;203;209	136;146	173;176;170	174	110;113;103	121;128	205	115;161;158;155	103;107;100	268;256
1537	Kangongo C	Andara	Kavango	Namibia	176	198;195	173	258	171	198	168	162	212;221	128	179	157;160	187	120	164;155	152	206	136;146	173	181	106	121	205;218	109;176	107	283
1540	Kangongo C	Andara	Kavango	Namibia	173	198;189;192	170;176;185	227;242	171	198	162;159	162;165	206;215	134;140;131;128;122	185	157	184;178	98;101;116	164;155	152;168	200;203	152;133;149	179;182	174;168;181;177;171	103;116	131;125	221;209;218	182;164	94;103;100;97	268;271;265
1542	Kangongo C	Andara	Kavango	Namibia	176;173	189	170;173	242	171	201	162;165	165	209	128;122	179	157;160	187;184	110;120;101	164;155	152;165;168	197;212	136;143	179;176;188;185;170	177	94;110	134;131	209	136;140;134	103;100	250;253
1558	Kangongo C	Andara	Kavango	Namibia	173	192	164	242	174	201	156	165	206	128	179	157	184	120	155	168	206	139	173	177	100	134	215	173	103	280
1559	Kangongo C	Andara	Kavango	Namibia	173	198;189	173	242;248	171	204;201;198	162	162;165	215;209	128;122	179	157;160	184	120	155	152	197	136	179;200;197	181;177	110;106;113	121	215;209;205	136;164	103;100	271
1560	Kangongo C	Andara	Kavango	Namibia	173	195;192	179	258;242	171	198	162;165	162	215	128	185;179	157	187;178	110	164	168	200;165;203;206	136;143	173	177	116	134;125	218	179;176	103;107	280;277
1649	Mutjiku C	Andara	Kavango	Namibia	173	192	167;164	248	179;171;174	198	162	165	221;218	119;125	179;154	154	184	82;110;91;120;101;116	172	155	194;197	149;146	179;176	187	110;106;103	128;125	205	161	103;107;110	268;271;265
1666	Mutjiku C	Andara	Kavango	Namibia	176;173	195;192	170;167;161;158	227;242	165;171;174	201;198	162;165;156	162;165	212;206;221	122	179;167	157;160;154;175;178	187;184	98;110;120;101	164;172;155	152;177;168;155	162;197;200	152;136;139;149;155	179;176;200;197	174;171	110;136;106;113	128;115;131;125	215;209;205	170;167;161;158;155;164	113;103;107	268
1669	Old Bagani C	Andara	Kavango	Namibia	176	198	176	242	171	198	162;159	162	215	131	182	160	187	101	155	177	162;203	139	191;194	184	125	134;131	212	170	103;107	268
1672	Mutjiku C	Andara	Kavango	Namibia	173	195;192	167;158	258;242	165;171	204;201;198	156	162	212;206	137;122	179;182	157;160	187;184	107;110;101	155	177	156;194;200	136	200;194;197	174;184	136;100;113	128;125	215;221	170;152;161;155;164	113;103	268;262;250
1688	Mutjiku C	Andara	Kavango	Namibia	176;173	202;195;192	167;179;158	261;227;258;245	171	204;198	153;165;156	168;165	206	137;131;122	179;182	157	187;184	91;120;101	172;155	152;180;177;165;155	197;200;191	139;149;146	179;176	187;177;171	106;103	121	199;212;209;205	118;188;115;170;179;161	103	268;250
1689	Mutjiku C	Andara	Kavango	Namibia	173	192	179	261	171	198	153	165	206	131	182	157	187	91	155	180	200	146	173;176	171	82;94;110;85;136;100;88;103	121	199	118;188	103	268
1690	Mutjiku C	Andara	Kavango	Namibia	173	198;189	161;185	242	171;174	201;198	162;165;156	165	215	134;122	179;182	157	184	132;98;129;101	164;155	152;165;155	194;197;200;165;203	136;139	176;185;182	181;140	94;122;119;97	121	205;218	170;173;167;161	103	268
1692	Old Bagani C	Andara	Kavango	Namibia	176;173	208;198;189;195;192	170;173;167;161	242;248	171;174	201;198	162;156	165	212;206;221;197	134;122	179	160;154	187;184	123;110;113;120;104;101	164;172;155	152;165;168;155	197;200	139;149;143	179	174;187	106;113;122	134;121;128;115;125	205;218	161;155;164	103;107	268;289;271;250;253
1693	Old Bagani C	Andara	Kavango	Namibia	176;173	189;195;192	170;167;164	258;242	171;174	201;198	162;165	162;165	212;206;218;215	134;128;122	157;179;182	157	187	126;98;129;120;101;116	155	168;155	197;200;203	136;139;143	173;179;176;200;194;197	168;165;184;177	110;125;106;122;103	118;134;128	205	161	103;107;100	268;271;274;277;250;253;259
1710	Mutjiku C	Andara	Kavango	Namibia	173	198;192	161;158	258;242	171	201;198	162	165	224;221;215;209	112;125	130	160;169;172	187	129;110	143;140;149;146	158;165;162	200;203	155	179;176;200	137;171	100;106;103;116	128;131	215;209;205;218	161;158	103;107	235;268;223;271;205;202;229;226;214;211;217;208;247;253;265
1711	Mutjiku C	Andara	Kavango	Namibia	173	202	167;158	242	171	201;198	156	168;162;165	212;206	125;122	179	157	187	94;91	155	165;155	200;203	139	173;176;170	174;168;187;196	110;100;106;113;88;116	121;125	215;212	118;167	103;100;97	235;238
1713	Mutjiku C	Andara	Kavango	Namibia	176;173	202;195;192	161;158	242	171	201;198	162;159	162;165	212;221;218	134;131;128;125	127;130	160;175;169	187;184	126;129;110;120;101	143;137	158;177;168	203;206;209	155	173;200;194;197	137;147;165;140	94;106;103	134;128;125	221;212;209;205	143;170;179;176;158	103;110	271;250;253
1716	Old Bagani C	Andara	Kavango	Namibia	176;173	198;195	170;176	227;242;221	171;174	201;198	153;162;159	162;165	218;215	134;131;128;125;122	160;157;179;182	157;160	187;184	139;129;110;120;101	155	177;165;168	197;206;209	136;139;143	173;176;194;197;170	165;181;184;171	125;106	134	212;209;205	158	103;107;100;110	292;268;289;271;250;253;265
1717	Old Bagani C	Andara	Kavango	Namibia	173	195;192	170;167	221	174;196	201	153;150;165	165	200;212;215;209	128;125;122	160;179	157;160	187	82;139;129;110;91;120;101	137;155	168	209	152;139;149;146	200;194;197	171	106;103	134;125	215;218;224	158	103	268;271
1735	Old Bagani C	Andara	Kavango	Namibia	173	198;195	170	276;227;248;245;214;221	171;174	201;198	153;162;159	162;165	212;206	122	179;182	157;160	187;184	110;101	164;155	168;155	218;197;203;206;209	152;139;149;146	179;176	174;165;181;150	100;106;103;116	134;128	205	158;155	103;107	250;253
1736	Old Bagani C	Andara	Kavango	Namibia	173	198;195;192	158	227;242;248;217;233;221	174	201;198	162;165;159	162;165	212;206	128;122	179;182	166;184;169;172	187;184	110;120;104;101	143;134;140;149;146;155	165;168;155	200;206;209	155	176;185;170	168;171;162;196	106;103	121;128	215;221;209;205;218;224	197;161;158	103;107	268;271;262;250;253;265
1747	Biro C	Andara	Kavango	Namibia	176	202;195	170;158	242	171	198	159	162;165	212	140;122	179	160	187	91;120	155	168;189	203;212	136;146	179;182	174	100;113	128;125	205	136;185;143;197;146;140;149;164	103;110	280
1752	Shadikongoro C	Andara	Kavango	Namibia	176	195	170;167	242	171	198	165	162	212	128;122	179;182	157	187;184	120;101	155	165;155	194;200	136;149	173;176	190;187	100;122	115;125	221	149	103	268;271
1756	Shadikongoro C	Andara	Kavango	Namibia	173	198	161	227	174	201;198	165	165	206	125	182	160	184	110;113	164;155	152	203	139	173;179;182	171;196	122	121;128	227;209	167	103;100	283;247
1852	Mayara C	Andara	Kavango	Namibia	173	195	167	242	171	198	162	162	206;197	140;125	179	160	187	110	155	165	203	143	176	177	125;88;91	137;125	212	167	103	277
1856	Mayara C	Andara	Kavango	Namibia	173	198	167	227	174	198	162	165	212	122	182	157	187	113	164	155	200	136	191	184	97	125	221	155	103	268
1857	Mayara C	Andara	Kavango	Namibia	176;173	198;195;192	167;164	242	171	201;198	162	165	212;206;215	128	179	157	187;184	126;110;101	172;155	152;165;168	194;197;200	139;143	173;179;182	187;177;171	110;100;122	134;128;125	209;218	170	103;100	268;274
1858	Mayara C	Andara	Kavango	Namibia	173	192	167	258	174	201	162	165	209	122	179	154	187	98	164	155	206	158	173;176	177	113	121;125	209	161	103;100	274
1870	Mayara C	Andara	Kavango	Namibia	173	189;195;192	167;161;164	258;242	171;174	201;198	162;156;159	165	206;197	131;125;122	179;182;167	157;160	187;184	107;98;110;101	155	165;168;155	218;197;200;203	136;143;146	173;152;164;176;188;194;197;203	174;184;171	110;106;113	134;128;115;131;125	205	161;158;164	103;107	235;238;247;253
1899	Mayara C	Andara	Kavango	Namibia	182	192	179	242	171	198	162	162	212	128;122	179	160	187	110	164	152	197	136	182	171	110	121	205	170;152;176;161;155	103;97	274
1900	Mayara C	Andara	Kavango	Namibia	173	187;189;195;192	170;164	242	174	198	162;165;156	162;165	212;206;209	131;125	179	157;160	187;184	110;120;101	155	168;155	197;209	152;136;139	209;173;152;188;191;194;203	165;177	110;100;106;113;103	134;121;140;128;131;125	205	179;161;158	103;107;100;97	235;283;271;250;253
1920	Mayara C	Andara	Kavango	Namibia	176;173	189;195	170;173	258;242;245	171;174	201	162;156	165	212	131	182;167	157	187;184	123;120;104;101	164;155	152;180;177;155	218;203	136;139	173;152;179;200;194	190	94;110;106;113;97	118;128;125	215	170;167;152;161	103	268;271
1926	Mayara C	Andara	Kavango	Namibia	176;173	189	170;173	227;245	171	201;198	162;156	165	212;206;218	131;125;122	182;167	157	184	123;107;120;101	164;155	152;177;155	197;200;203	136;139;149	173;152;179;194;215	187;171	106;113;97	118;121;125	215;205	170;167;152	113	268;271
1927	Mayara C	Andara	Kavango	Namibia	173	195	167	227	171	198	156	165	212	122	179	157	184	101	155	177	212	133	191	137;181	100	131	209	143	103	271
2217	Shadikongoro C	Andara	Kavango	Namibia	176	192	176	258	171	198	162	165	215	122	179	157	184	120	164	162	215	146	158;161	171	116	134	221	161	103;100	268
2218	Shadikongoro C	Andara	Kavango	Namibia	173	192	164	242	171	198	162	162	206	137	179	157	187	110	155	180	212	136	182	162	106	131	209	161	103	238
2219	Shadikongoro C	Andara	Kavango	Namibia	173	195	164;158	242	171	201;198	162;165	165	215	137;125	179;182	157;160	187	110	155	165;168	197	136;146	179	181;184	94;106;91	121;128	209	161	107	268;271;253;256
2220	Shadikongoro C	Andara	Kavango	Namibia	173	192	167	258	171	204	165	165	206	122	179	157	187	113;104	155	168	221	139	179;182	171	122	128	209	149	103;107	262
2221	Shadikongoro C	Andara	Kavango	Namibia	173	192	173	242	174	201	165	165	206	134	188	157	184	110	155	152	194	130	191	171	100	118	212	146;170	103	268
2223	Shadikongoro C	Andara	Kavango	Namibia	176;173	198;192	176;161	258;242	171	198	162	165	206;215	122	179	157;160	184	110	164;155	162	215	139;146	194	171	110	134;128	221	170;152;161;155	103	271
2238	Shadikongoro C	Andara	Kavango	Namibia	173	187;195	170;179	242;211	171	201;198	162	165	206;215	128	179;182	157;160	184	113	155	165;155	197;200	130;139	173	165	100	134;121	221;209;205;218	173;176;161;158	100	274
2239	Shadikongoro C	Andara	Kavango	Namibia	173	187;189;195;192	170;161;179	242;211	171	201;198	162	162;165	206;197;215	134;128	179;182	157;160	184	110;113;120	164;155	177;165;168;155	194;197;200	130;139;143	173;179;191	165	100;122	134;121;125	221;209;205;218	185;173;176;161;158	103;107;100	274
2240	Shadikongoro C	Andara	Kavango	Namibia	173	192	182	242	171	198	165	162	221	128	179	160	184	132	155	168	194	143	179	190	122	121	221	170	107	268
2245	Shadikongoro C	Andara	Kavango	Namibia	176	198	176	242	171	198	156	165	209	128	182	157	184	120	155	155	203	139	176	171	113	131	209	164	103;100	271
2262	Shadikongoro C	Andara	Kavango	Namibia	173	195	167	258	171	198	165	165	206	128	179	157	184	126	164	165	218	139	170	171	113	131	218	155	100	274
2263	Shadikongoro C	Andara	Kavango	Namibia	173	187;195	170;167;179	242	171;174	198	162	165	212;206;215	125;122	179	157;160	187;184	107;98;129;104	164;155	152;168;155	197	139;133	170;182	171	110;106;119	128;131;125	212;209	173;179;176;161;158	100	250;247
2264	Shadikongoro C	Andara	Kavango	Namibia	176;173	187;195	170;167;179	227;242	171;174	201;198	162;159	162;165	206;215	125	179;182;167	160	187;184	129;91	164;155	152;168;155	197	136;139;146	173;179;191;170	174;165;177;171	110;100;119	134;128;125	215;221;209	161;158	107;100	244;268;271;250;247
2265	Shadikongoro C	Andara	Kavango	Namibia	173	187	179	242	171	198	162;156	165	215	122	182	157	184	129	164	168	197	139	179	171	119	128	209	158	103;100	271
2267	Shadikongoro C	Andara	Kavango	Namibia	176;173	187;198;195;192	170;167;158	227	171;174	204;201;198	162;159	165	215	125	185;179	157;160	187;184	129;120;101	164;161;155	165;168;155	197	136;149	173;152;179;182;203	177;171	100;106;119	131;125	212	152;164	103;100	271;253
2268	Shadikongoro C	Andara	Kavango	Namibia	176;173	189;195	170;158	227	171	201	162	165	206;203;215	131;125	185;182	157	187;184	98;120;101	164;172	165	197	152;139;149	179;182	177	106;116	134;121;125	212;218	152	103	244;268;271;241;274;250;253
2269	Shadikongoro C	Andara	Kavango	Namibia	173	187;192	173;161;179	242	174	198	162	162;165	215	122	182	157	187;184	110	164	155;162	200	139;149;158	173;152;185	174;181	125;100;106;119	121;128	209	158	103;107;100	259
2288	Shadikongoro C	Andara	Kavango	Namibia	173	192	170	242	174	198	162	162	206	131	179	160	184	129	164	155	197	136	173	187	100	125	215	170	103	247
2292	Shadikongoro C	Andara	Kavango	Namibia	176;173	198;189;195	170;167;161;164	242	171	201;198	162;165	155;165	212;206	119;125	179;182	157;160;154	187;184	88;91	164;155	152;165;155	224;197;200;203;206	136;133;146	173;176;170	168;165	100;113;103;91	128;131	221;218	112;167;152	107;100	271;250
2373	Shadikongoro C	Andara	Kavango	Namibia	176;173	198;195	173;167;161;179	258	171;174	201;198	162;165;159	162;165	206;215	134;125;122	179;182	154	184	129;110;104;101;85	164;155	177;168	218;197;203	136;139;158	176;185;170	177;171	106;116	118;134;140;128;112;131;125	215;221;212;209;205;218	146;170;173;152;149;176;161;155;164	113;103;110	268;271;274;277;253;256
2374	Shadikongoro C	Andara	Kavango	Namibia	176;173	187;198;195;192	170;161;179	258;242;273	171;174	201;198	162;165	162;165	212;206;215	119;128;125;122	179;182;167	157	187;184	126;129;110;120;101	164;155	152;177;165;168;155;162	215;218;194;197;203	130;152;139;146;158	173;179;176;194;185;197;170;182;149;158;203;161	174;184;177;171	100;106;113;119;103;116;97;91	134;121;140;128;131;125	215;212;209;218	170;173;167;152;149;176;161;158;155;164	113;103	268;271;253
2375	Shadikongoro C	Andara	Kavango	Namibia	173	198;189;192	170;173;167;161	227;258;242	171;174	204;201;198	162;165;156	162;165	212;206	125;122	179;182	157	187;184	110;120;101	164;155	152;168	197;203	152;139;149;146	173;176;197;182;203	171	110;106;116;91	118;131;125	215;212;209	136;146;170;173;152;149;161;158;155	103;100	286;247;253
2376	Biro C	Andara	Kavango	Namibia	173	198;195	167;179	227;236;221	171	198	162;156	162;165	212	131;125	179	157;154	187;184	120	164	152;168	215;221;203	136;149;146	191;170	184;177;171	116;91	118;121	215	176	103	286
2377	Biro C	Andara	Kavango	Namibia	176;173	189	167	227	174	198	156	165	212	122	179	157	187;184	110;113;120;101	155	152	203	146	173	181	100;116	118	209	158	103	262
2382	Biro C	Andara	Kavango	Namibia	176	198;195	170;185	227;258	171	198	162;165	165	212	125	182	160	187	110;120	155	165;189	197;212	136	179;182	174;181;171	100	118;134;121	215;218	140;152;149;161;158;164	103;107	271;253
2383	Biro C	Andara	Kavango	Namibia	176	195	170	258	171	198	165	162	212	122	179	157	187	120	155	189	212	136	182	174	100	125	221	149	103	271
2384	Biro C	Andara	Kavango	Namibia	173	189	185	258	171	198	162	165	224	122	167	157	187	101	155	165	218	143	197	171	100;119	121	209	167	103	253
2386	Biro C	Andara	Kavango	Namibia	173	198;195	167	227	171	201;198	162;156	165	212	125;122	179;182	157	184	101	164;155	152;177;168	200;212	133	179;188;191;170	181;184;171	100;103	121;128;131	209;218	143	103;107	271
2390	Shadikongoro C	Andara	Kavango	Namibia	176;173	187;198;189;195;192	173;167;161;164	227;242	171	204;201;198	162;156	165	212;206;215	128;122	179;182;167	157;154	184	129;110;120;104;101	164;155	152;165;155;162	215;221;197;203	152;136;139;149;146;158	173;179;176;194;185;203	181;184;171	106;113;116;91	118;134;128;125	215;212;209	136;146;170;173;152;149;158;155;164	103;107;100;110	268;271;262;265
2391	Shadikongoro C	Andara	Kavango	Namibia	176;173	187;192	161;179;164	242	171;174	198	162	162;165	206	128;125;122	182;167	157;160;154	187;184	129;110;104;101	164;155	165;168;155;162	215;197;203	152;136;139;143;158	173;179;176;185	174;165;181;184;171	100;106;113;119;103;116;97	134;121;140;128;125	212;209	170;161;158	103;107;100;110	268;271
2393	Shadikongoro C	Andara	Kavango	Namibia	176;173	198;189;195;192	170;173;167;161	227;258;242	171;174	201;198	162;165;156;159	162;165	212;206;215	134;131;128;125;122	179;182	157	187;184	126;129;110;113;91;120;101	164;155	152;165;168;155;162	194;197;200;203;206	130;152;136;139;133;146;158	209;173;179;176;191;194;197;170;182	168;181;184;177;171	110;100;106;113;103;116	118;134;121;128;155;131;125	215;212;209;205;218	109;170;173;149;176;161;158;155;164	103;107;100	244;286;268;271;250;247;253
2394	Shadikongoro C	Andara	Kavango	Namibia	173	187;195	179;164	242	171	198	162	165	215	122	182	157	187	129	164	168;155;162	215;197	136;139	179	171	106;119;116	128	209	158	103;107	271
2396	Shadikongoro C	Andara	Kavango	Namibia	176;173	187;195;192	179;164	242	171;174	198	162;159	162;165	212;206;215	128;122	179;182	157;154	187;184	132;129;110;113;104;101	164	152;165;168;174;162	215;197	152;136;139	179;176;185	174;181;171	110;106;119;116	134;121;140;128	215;209	173;161;158	113;107;100;110	268;271;253;265
2397	Shadikongoro C	Andara	Kavango	Namibia	176;173	187;198;192	173;179;164	242	171	201;198	162;159	162;165	212;206;215	128;125;122	179;182	157;160;154	187;184	132;129;110;113;120;104;101	164;155	165;168;162	215;197	152;136;139;149	179;176	171	100;106;116;91	121;140;128;125	215;209	149;161;158;155	113;103;107;100;110	271
2399	Biro C	Andara	Kavango	Namibia	173	189	170	227;242	171;174	204;198	162;165;156	162;165	212;206	131;128;125;122	179	157	187;184	107;110;120;101;116	164;155	152;168	197	152;139;146	173;179	184;171	94;110;100;116;91	118;140;125	209	173	103;100	235;238;241;274
2400	Biro C	Andara	Kavango	Namibia	176;173	198;192	170;173;176	242	174	198	156;159	162;165	206;221	128;125	179;182	160	184	132;98;101	164;146;155	152;165	194;200	136;139	173;152;194	174;177;171	94;110	134;121;131;125	215;221;218	161;158;164	100	286;268;289;262;265
2402	Biro C	Andara	Kavango	Namibia	173	198	161	261	174	201	165	168	206	131	179	160	187	110	164	168	215	139	176	171	110	131	215	164	103	280
2406	Biro C	Andara	Kavango	Namibia	173	192	167	242	174	198	162	162	212	131	185	157	187	104	155	155	206	158	182	190	100	134	218	176	103	265
2407	Biro C	Andara	Kavango	Namibia	176;173	198;192	167	242	174	198	162	162	212	131;128;125;122	185	157	187	120;101	164;155	155	200;206	139;149	179;200	190;184	100	115;125	218	176	103;107	274
2408	Biro C	Andara	Kavango	Namibia	173	195;192	167;161;164	242	174	201;198	162;165	162;165	206;197	122	185;179	157;160	187;184	110;120	164;155	152;168;155	197;203	136;139	173;176;170	177;171;196	110;100;106	128;115;131;125	215;218	176	103;107;100;110	250;253;259
2409	Biro C	Andara	Kavango	Namibia	173	198;195	167;161	261;258;242;245	171;174	201;198	168;162;165	168;162;165	212;206	131;122	179;182;167	157;160	187	110;120;101	164;172;155	165;168	215;194;200	139;146	176	190;168;181;184;171	110;106;91	128;115;131	215;209;205;218	161;164	103;107;100	244;283;280;262;247;265
2410	Biro C	Andara	Kavango	Namibia	173	198	161	242	171	201	162	162	221	128	179	154	187	110	155	177	191	139	170	165	110	121	218	170	113;110	268
2411	Biro C	Andara	Kavango	Namibia	173	192	176	227	171	198	162	162	206	122	167	157	187	110	155	165	200	143	191;194	171	103	131	221	167	107	238
2412	Biro C	Andara	Kavango	Namibia	176;173	192	176	227;242	171	204;198	162	162	206	122	179;167	157	187;184	110;120	164;155	165;168;155	197;200	152;139;149;143	173;194	174;171	110;103;116	131	221	170;167	103	238
2413	Biro C	Andara	Kavango	Namibia	173	198;189;192	161	227;242	171	204;201;198	162	162;165	212;221	128	179;167	157;154	187	110;120	155	177;165;168;155	191	139;149;143	170	165;171	110;103;91	121;131;125	218	170;167;149	113;103;107;100	238;271
2414	Shadikongoro C	Andara	Kavango	Namibia	173	187;198;195;192	173;167;161;179;164	227;258;242	171	201	168;162;156	162;165	212;215	119;125;122	179;182;167	157;160;154	187;184	98;129;110;120	164;155	165;168;155	215;194;197	152;136;139;149;146	179;176;200;191;194;170;182;203	165;181;171	110;100;106;103;116;97;91	118;134;121;128;112;125	212;209;205	146;170;167;152;149;161;158;155;164	113;103;107;100	268;271;253
2415	Shadikongoro C	Andara	Kavango	Namibia	176;173	189;195;192	170;173;164;185	258;242	171	198	162;156	162;165	212;197;215;209	134;119;122	179;182	157;160	184	107;129;110;120;101	164;155	177;165;168;155;162;186	218;197;200;203	152;136;139;143;146	173;152;179;176;188;185	174;165;171;196	100;103;116	128;131	215;209;205	118;121;155	103;107;110	271;274;277;262;250;253;265;256
2417	Shadikongoro C	Andara	Kavango	Namibia	173	198	170	242	171	201	159	165	206	125	182	157	184	110	172	177	209	143	173	177	106	131	221	149	103	271
2422	Biro C	Andara	Kavango	Namibia	173	195	179	236	171	198	162	165	212	131	179	154	187	120	164;155	168	215;197	136	191	184;171	116	121	215	176	103	286
2423	Biro C	Andara	Kavango	Namibia	176;173	195	170	242	171	198	165	162;165	206	125	179	157	187	110;120;116	155	152;165	194	136	176	174;190;171	100	128;125	218	136;149	103	268;271
2425	Biro C	Andara	Kavango	Namibia	173	198;195	167	242	174	198	162	162	212	122	179	157	187	110;101	172;155	155	200	139;146	188;191	168	91	128	218	118;176;158	103	271
2427	Biro C	Andara	Kavango	Namibia	173	195	167	242	171	198	162	162;165	206;197	125	179	157;160;154	187	110;101	155	152;165	197;203	143	176	177	110;125;100;106;103;97	118;128;137;125	212;218	167;164	103;100	277;259
2428	Biro C	Andara	Kavango	Namibia	173	195	167	258;242	171;174	198	162;165	165	212;206	128;125	179	157	187;184	126;107;98;116	164;155	152;165	197	139;133	170;182	174;181;177;171	106;113	131;125	212;218	155	100	274;247
2431	Biro C	Andara	Kavango	Namibia	173	187;195;192	173;161;164	242;211	171;174	201;198	162;159	165	212;206;215	131;119;122	179	157	187;184	132;129;110;113;91	164;155	168;155	221;194;197;200	136;139;149	173;179;191	174;171	110;125;100;113	121;128	209;205	170;173;167;149;176;161;158;164	113;103;107	268;271;274;277;253;259
2434	Biro C	Andara	Kavango	Namibia	176;173	192	170;167	258;242	171	201;198	174;165	165	212;206	125;122	179	157;160	187;184	120;116	164;181;155	152;165;189	197;212	136;139;143;158	179;170;182	165;171	110;100;106;113;122	134;121;125	221;212;209;205	149	103;100	268;253
2435	Biro C	Andara	Kavango	Namibia	173	192	170	242	171	201	165	162	206	122	179	160	187	107;113;116	164	165	197	143	179	168;165	100;122;88	121	205	167	103	265
2436	Biro C	Andara	Kavango	Namibia	173;164	198;189;195;192	170;167	227;258;242	171	201;198	162;156	162;165	212;206;197	128;125;122	179;182	157;160	187;184	110;120;101;116	164;155	152;165;155	197;203;206	136;143	179;176	190;177;171	110;113;122	121;128	205;218	167;161;158;164	103;107	244;262;250;247;265
2439	Shadikongoro C	Andara	Kavango	Namibia	173	189;192	173	258;242	171;174	204;201;198	162;156	162;165	215	119	185;182	157;160	187	110;120	155	165;168	194;197	143;146	173;152;179	171	110;100	121;128	209;205	161	103	265
2440	Shadikongoro C	Andara	Kavango	Namibia	173	198;192	167	242	171	201	162;156	165	206	134;119	179;182	160	184	120	172;155	165	197	130	179	174	100;116	140;128;125	218	167	103	268
2442	Shadikongoro C	Andara	Kavango	Namibia	173	195;192	167	242	171;174	201;198	162;159	162	212;206	131;119;128;125;122	185;167	157	187	120;101	164;152;161;155	155	203;206	149;146	179;176;200;197	174;190;153	100;113	131;125	215;209;205;218	176;161;158	103;107	274;259
2447	Biro C	Andara	Kavango	Namibia	176	198;192	173;176	258	174	201	165	162	206	125	182	157;160	184	110;101	146;155	152;177	200	139	179;176	184;177	110;119;116	134;121	215;218	158	103	274;277
2448	Biro C	Andara	Kavango	Namibia	176;173	198;192	173;167;176;164	227;258;242	171;174	204;201;198	165;156	162;165	212;206;215	134;131;128;125	188;182	160	187;184	110;91;101	164;146;155	152;177;165;168;155	194;197;200;206	130;139;143;158	173;179;176;200;191;194;170	174;168;165;187;181;184;177;171	94;110;100;106;103;116	118;134;128;131;137;125	215;221;212;209;218	170;173;176;161;158;155;164	103	268;271;277;262;250;247;253;265;259
2449	Biro C	Andara	Kavango	Namibia	173	192	170	258;242;273	171;174	198	162;165	165	212;221;215	128;125	179;167	157	184	129;91;101	164;155	152;165	197;200	139;143	173;179;194	168;171	106	121	221;218	170;167	103;100	262
2450	Biro C	Andara	Kavango	Namibia	173	192	176	258	171	198	162	165	206	125	179	157	184	91	164;155	155	194;200	130;143	200;191	171	100;106	118;121	221	170;161	103;100	271
2451	Biro C	Andara	Kavango	Namibia	173	192	173	242	174	201	165	165	206	134	188	157	184	110	155	152	194	130	191	171	100	118	212	146;170	103	268
2461	Shadikongoro C	Andara	Kavango	Namibia	176	195;192	167;176	227;258	171	201;198	162	165	215	128;122	179	157	187;184	110;91;120;101	164;152;161;155	152;162	215;197	143;146	161	171	113;119;116	134;128	221;218	161;158;155;164	103	268
532	Divundu C	Andara	Kavango	Namibia		187	179	242	171	198	162	165	215	122	182	157	184	129	164	168	197	139	179	171	119	128	209	158	100	271
545	Old Bagani C	Andara	Kavango	Namibia	173	192	164	261;211	174	198	162;159	165	206	128;122	179;182	160	187	110;113	155	165	197		176	181	106;119	128;131	221;205	173	107	250;247
546	Old Bagani C	Andara	Kavango	Namibia	173	192	167	273	171	198	162;165	165	224;212;221;215	128;122	179	160	184	120;101	155	168;155	200	130;149;146		165	100;106;91	134;121;128	209	167;152;149;158;155	103;107	256
551	Divundu C	Andara	Kavango	Namibia	176	198	176	242	171	201	162	165	212	140	179	160	184		155	168	206	139	179;176	174	94	128	205	185;140	100	271
552	Divundu C	Andara	Kavango	Namibia	173	195	173	227	171	198	162	165	206	122	179;182	157	184	98	155	168	200	136	176;182	177	110	115;125	209		103	274
553	Old Bagani C	Andara	Kavango	Namibia	176;173	195;192	167;158	258;242	165	201;198	162;165;156	162;165	212;206	134;137;122	179;182	157;160	187;184	110	155	152;177	200;212	136	173;176;191;194;197;170	174;137	136;106;113	121;128;131;125	215;221;209;218	161;155	103
571	Divundu C	Andara	Kavango	Namibia	176;173	198;195	173;167	227	171	201;198	162;165	165	221;215	119;128	179	157	187	139;110;101		168	197;212	139;146	176;191;182	165;181	100;106;119;103;116	134;121;128	221	185;188;170;176	113;103	268;262
574	Divundu C	Andara	Kavango	Namibia	173	187	179	227;242	171	198	162	165	215	122	182	157	184	129;101	164;146	152;168	197	139	179;176	171	119	128;125	209	158	103;100
575	Divundu C	Andara	Kavango	Namibia	173	202;192	167;161	242	171	198	162	165	206;221	122	179	160;154	187	101	164	165	197	139;158	173;188;191;170	171	133;100	121;128	221;218	170;167		274
576	Old Bagani C	Andara	Kavango	Namibia	173	189	185	242	174	201	162	162	206	122	185	160	187	110	155	168	197	143	173	171	110	121	205	140;182	103
594	Divundu C	Andara	Kavango	Namibia	176	192	176	258	174	201	165	165	215	122	179	160	187	113	155	152	224	143	191;194	177	82;110	125	212		107	256
602	Old Bagani C	Andara	Kavango	Namibia	176;173	198;195;192	170;167	258;242	171	201;198	162;165	162;165	212;206;221;209	131;128;125;122	182	157;160		88;94;107;98;91;101;116	155	165;168	197;200	130;136;149;143;146	173;152;179;176;200;197;170;221	187	106;103;116	121;128;115;125	209;205	149;161;158;164	103;100;110	268
732	Andara DH	Andara	Kavango	Namibia	173	192	164	227	171	198	162	165	206	149;131	179	169	184	110;120	137;146	155	206	155	176;197	187	94	128	218	170;167	103
735	Kangongo C	Andara	Kavango	Namibia	173;164	198;189;195;192	170;176;161	227;258;242;251	171	201;198	165;156;159	162	212;206;221;209	134;143;140;131;128;125;122	179;182		187;184	107;98;129;110;113;120;101;116	164;155	152;165;168;155	194;197;200;203;206;209	139;143;146	173;152;179;176;200;185;197	168;187;181;177	94;110;113;88	118;134;121;128;115;131	212;209;205	136;188;170;167;149;176;161;158;155;164	103;107;100;110	268;262;247
1041	Andara DH	Andara	Kavango	Namibia	173	192	167	242	171	201	162		206	122	182	157	184	101	164	168	218	143	200;197	168	103	121	224	185	100;97	253
1053	Andara DH	Andara	Kavango	Namibia	173	198;189;195;192	167;176;185	227;242	171;174	204;201;198	162;159	155;162;165	212;206;197	125;122	179;182;167	157;160;154	187;184	88;107;98;110;113;91;104;101	155	152;177;165;155	224;162;197;200;203	136;133;143	173;191;194	174;190;165;187;171	100;113;103	121;128;131	215;221;205;218		113;107;100;97	244;232;235;238;274;250;247;256
1057	Andara DH	Andara	Kavango	Namibia	176	192	179	258	174	198	165	162	206	134		157	184	120	164	189	197	136	176	193	106	125	212	167	103	253
1072	Andara DH	Andara	Kavango	Namibia	173	198	176	258	171	201	162;159		221	125	179	157	187	129	155	165	162;191	139	173;176	171	106	121	209	149	103;107	262
1076	Andara DH	Andara	Kavango	Namibia	176	195;192	170;173;167;176;161;164	227;242	165;171;174	201;198	162;156;159	162;165	212;206;215	131;128;125;122	179;182	157;154		88;94;98;110;120;101	164;155	152;177;165;168	200;203	130;152;136;143;158	206;173;152;179;176;200;191;194;185;197;170;182;203	171	106;113;122;97	134;143;128;131;125	215;221;209;205;218	173;167;152;149;161;158;155	113;103;107;100;110	235;268;271;241;247;253
1082	Andara DH	Andara	Kavango	Namibia		189	167	258	171	198	162	165	212	128	179	157	187	101	155	171	200	139	173;176	177	91	115	218	146;173	103	259
1085	Andara DH	Andara	Kavango	Namibia	173	195;192	170;173;167	227;242		201;198	162;165	162;165	206	131;119;125	179	157;160	187;184	110;113;120;104;101;116	155	152;155	200;203	149;143	182	174;177	125;119	115;131	215;221;209;218	197;161;164	103;100	271;253;259
1092	Andara DH	Andara	Kavango	Namibia	176;173	198;192	167;176	227;242	171	201;198	168;162	165	206;209		179;167	157	190;187	120;101	164;155	152;165	200;203;206	136;139	173;179;215;221	187;171	119;91	128;131	221;209	170;173;161;158;155	103	250;256;259
1093	Andara DH	Andara	Kavango	Namibia	173	195;192	158	227;242		198	156	165	212;203;215	122	179	166;169;172	184	113;104;101	134;137	177;165;168	200;212	155	170	174;181	110;100	115;131	215;209;202	143;140	103	268;271
1098	Andara DH	Andara	Kavango	Namibia	176	198	158	258	171	201	165;156	162	212	128	179	166;175	187	101	143;140	168	200		209;197	184	110	121	218	170	103	286
1102	Andara DH	Andara	Kavango	Namibia	173	195	176	227	171	198	162	165	215	131	179	160	184	101	155	155	200	136	182	171	106	134	221	161		247
1108	Andara DH	Andara	Kavango	Namibia	173	192	167	242	171	201	162		221	122	182	157	187	120	155	168	194	158	173;176;170	165	110	121	205	176	103	271
1316	Divundu C	Andara	Kavango	Namibia		189;195;192	170;173;167	227;258;221	171	201;198	162;156	165	212;206;221;209	149;131;128;125;122	157;179;182;167	157;154	187	139;110;113;91;120;104;101;142	155	177;165;168	194;200;203;206;209	136;139;133;143	176;197	171	100;106;113;119;116	121;128;131;125	209;205	158	100	232;283;289;271;250;253;265
1333	Divundu C	Andara	Kavango	Namibia	173	189;195	161;158	258;242	171;174	201;198	162;156	165	233;212;206;209	137;131;128	179;182;167	166;169;172	187	101	140;149;137;152;155	152;168	194;203;209	155	173;152;179;176;197	174;168;165;171	100;97	121;128;125	215	136;140;134;152;158;155		268;271;250
1364	Divundu C	Andara	Kavango	Namibia	176;173	198;189	161;158;155	227;242	171;174	204;201;198	162	162;165	206;215	125		166;184;169;172	187	94;98;101	143;149;146;152	165;168;155;189	218;191;206;212	155	173;191;197	174;165	110;100;91	134;121;140;128	215;209;218	149;158;155	103;107;100	232;235;238;229;250;247;259
1410	Kangongo C	Andara	Kavango	Namibia	173	198	167	227	171	198	159	165	206	131	182	160	184	101	155	168	159;197	143	200	140	82	134	209		103	265
1412	Kangongo C	Andara	Kavango	Namibia	176	198;192	170;188	227	171	198	168;162		206	128	179;182	157	187;184	110;120	155	152	197;200	136	173;170;182	177	100;113;97	128	205;218	121;170;179;161;164	103	235;241;247;265;259
1416	Kangongo C	Andara	Kavango	Namibia	173	192	164	245	171	201;198	165	165	212	131;128	176	154	184	129;91	164;137;146;155	165;168	197	139	185	187;171	119	118	212;218		103	268;250;253
1434	Kangongo C	Andara	Kavango	Namibia	173	195;192	158	242	171	201	165	162	212	119;128;125;122	179	166;169	184	110;91	140;137	165	209		170;167	174	113	128	218	152;155	100;97	283;280;277
1440	Kangongo C	Andara	Kavango	Namibia	173	202;195	173;167	242	171	201	162	168	212	128;122	179	160;154	187;184	120;101	155	177	206;209	139	179;200	184	94;116	128;125	221		103	268;280
1461	Kangongo C	Andara	Kavango	Namibia	173	187;195	158	242	171;174	198	162;165	165	212	131;122	179;167	175;178	184	101	140;149;137	168;155	197;206		188;191	187;177	122;97	115	221;205;218;202	146;161	100	268;271;280;277
1493	Kangongo C	Andara	Kavango	Namibia	173	198	185	227	171	198	165;159	162;165	215	134;140	185	160	187	98;91;101	164	168	203	152	182	181	100;103;116	131	215;221;218;224		103	268
1515	Kangongo C	Andara	Kavango	Namibia	173	198	161;158	227	171	201;198	165;159	162;165	215	134;140;128		190;184;172	187;184	101	140;149;137;152	177;168	203	155	206;179;176;185;182;203	181	100;116	121;131	215;221;209;205;218;224	182;161;158	103;100	268
1519	Kangongo C	Andara	Kavango	Namibia	173	195;192	158	242	171	201	162;165	162;165	212;215	119;128;125;122		166;169	184;193	110;91	134;140;137	165	209	155	170	174	106;113	134;128	215;218	112;115;155	107;100	280
1538	Kangongo C	Andara	Kavango	Namibia	173	198	164	242	171		162	165	215	131	179	157;160;154	187	110	155	168	203	146	179	181;171	106	131	215	179;182	100;97	247
1541	Kangongo C	Andara	Kavango	Namibia	173		170;167;176;185	227;242	171;174	204;201;198	162;165;159	168;162;165	212;206;215	134;140;128;125;122	185;179;182	157;160;154	187;184	129;110;113;101	164;155	177;168	197;203;206;209	152;136;139;143;146	173;152;179;176;197;170;182	174;187;181;184;177	94;110	134;128;131;125	221;209;205;218	185;170;173;152;179;182;161;158;164	103;100	235;268;238
1543	Kangongo C	Andara	Kavango	Namibia	173	195	176	227	191;171	198	156		212	128	179	157	187	110	155	174	200	139	188;191	171	100	121	221	161	103;107	271
1648	Old Bagani C	Andara	Kavango	Namibia		192	167	227	174	226	162	162	212	143	179	157	187	120;116	164	152	197	139	179	174	113	125	209	155	97	277
1667	Mutjiku C	Andara	Kavango	Namibia	173	198;189;192		227;242	165;171	201	162;156;159	165	212;215	125;122	179;182	157;154	187;184	110	155	152;165;168;155	197;200	143;158	170;182	184;171	106;113;91	134;128;131	221;209;205;218	167;152	113;103;100	241;247
1670	Old Bagani C	Andara	Kavango	Namibia	182;173	198;189		227	171	201;198	162;165	165	218;215	128	182	154	187;184	88;113	164;155	152;155	224;197	139;143	173;200;191;182	165;181	113	134;125	215;205	161;158	103;100;97	271;250;253
1673	Mutjiku C	Andara	Kavango	Namibia	173	198;189;195;192	170;167;164	242	171;174	201;198	153;162;156	162;165	206	140;131;128;122	179	157;160	187	123;110;113;91;120;101	164;155	152;165	194;197;200;191	152;136;146	209;179;176;188;200;197	177	94;100;103;116	121;128;125	199;212;202		113;103;110	286;268;271
1674	Mutjiku C	Andara	Kavango	Namibia	173	198		230	171	198	162	165	206	131	179	157	184	120	164	168	203	146	188;185	171	106	112	215	170;149	103	253
1694	Mutjiku C	Andara	Kavango	Namibia	173	198;195	161	227;242	171;174	201;198	162;159	162	212	134;131	130	163;172	187	129	134;140;137	168	194;209		197	147	94;103	128	205	112;179	103;110	229;247;265
1696	Mutjiku C	Andara	Kavango	Namibia	176	202;198	161;158	242	171	201	165	168	206	122	179	157	187	91	155	165	197;191	139	173;176	168;165	110	121;115		118;115	113;103;100;110	250
1712	Mutjiku C	Andara	Kavango	Namibia	173	192	167	258	174	201	168	162	215	140	179	157;160	184	110	164	168	203	136	182	196	103	134		173	103	286
1714	Old Bagani C	Andara	Kavango	Namibia	173	195	170	242	171	198	162		218;215	128	182	160	184	129;101	155	168	203;206	143	194	165;184	100;106;103	128	221;212	143;170;179	103	253
1719	Mutjiku C	Andara	Kavango	Namibia	176;173		170;173;167;161	258;242;248;273;221	171;174	201;198	153;162;165;159	162;165	212;221;209	134;131;128;125;122	179;182	157;154	187;184	139;110;91;120;101	155	152;180;177;165;168;155	218;194;197;200;203;191;206;209	152;136;139;149;143;146	173;179;176;200;191;194;185;197;170;182;203	165;187;184;171	106;103	118;134;121;128;125	215;199;221;212;205;218	170;167;149;161;158	103;100;110	268;271;250;253
1720	Mutjiku C	Andara	Kavango	Namibia	173	192	167	248	174	198	162	165	221	122	179	154	184	120	172	155	197	149	179	187	106	128	205		103;107	268
1721	Mutjiku C	Andara	Kavango	Namibia	176;173	198;195;192	167	261;242;248;245	171;174	198	153;162;156	162;165	212;206;221;197;215	134;131;128;122	179	154	187;184	123;94;107;110;113;91;120;101;116	164;172;155	152;165;168;155	194;197;200	139;149;143;146	179;176	174;171	94;110;106;113;103;116	121;128;115;125	199;205		103;107;100;110	268;289;250;253
1732	Mutjiku C	Andara	Kavango	Namibia	176	195	170;173	261	171;177	201	162;156	165	197	134;137;131	157;179	157;160	184	94;110;113;104;85	155	165	197;200		173;179;176	174;184	113;116	121	215;218	173;158	103	271
1855	Mayara C	Andara	Kavango	Namibia	173	198	167	227	171	198	159	165	206	131	182	160	184	101	155	168	197	143	200	140	110	134	209	167	103
1859	Mayara C	Andara	Kavango	Namibia	176	192	167	227	171	201	159	165	224	137	179	160	178	110	164	177	197	143	173;176	177	110	131		173;155	103	268
1869	Mayara C	Andara	Kavango	Namibia	176	198	176	258	171	201	156	162	212	128	179		187	101	164	168	200	143	206;209	184	110	121	218	170;167	103	286
1872	Mayara C	Andara	Kavango	Namibia	173	192	176	242	171	198	159	162	212;206	128	182	157	184	101	164;155	152;165	194	130;143	173	171	110;100;97	118;125	209	158	103
1876	Mayara C	Andara	Kavango	Namibia	173	189;195	176;161;158	227;242;211;233	171;174	204;201;198	162;159	165	212;215	134;128;122	173;179;182	157	187	110;113;120;101	164;172;155	152;165	200;209	139;143;158	179;176;197;182;203	165;177;171;156	110;113	118;134;121;131	215;209;205;218	170;173;167;182;158;155	103;107;100
1877	Mayara C	Andara	Kavango	Namibia	173	198;195	170;176	258;242	171	198	162	168;162	212	125	179	157	184	91;101	164;155	180;177	203;212	152;136	179;200;182;203	174	110;100	121	205	167;149	107;100
1878	Mayara C	Andara	Kavango	Namibia	176;173	202;187;198;189;195;192	170;173;176;161;158	227;258;242	171;174	204;201	153;162;165;159	168;165	212;206;197	134;131;128;125;122	179;182	157	187;184	123;126;88;107;98;129;91;120;101;116	164;172;155	152;165;189;162	194;197;200	152;139	173;152;176;200;191;197;170;182	181;171;140	110;100	121;128;125		118;191;115;161;158	103;107	268
1879	Mayara C	Andara	Kavango	Namibia	173		173	258	171	198	162	171	206	119	179	157	184	110	155	152	200	146	176	171	110	140	218	170	103	268
1880	Mayara C	Andara	Kavango	Namibia	176;173	189;195	167	242	171	198	162	162;165	224;206;227;209	137;128	170	157	190;187;184	129;91;101	155	152	200;203	139;146	173;152;182;203	181	110;113;103	121		136;146;149;182;155	103;100	274;277
1882	Mayara C	Andara	Kavango	Namibia	173	195	176	258	174	219	162;156	165	209	128;125;122	179	157	187	129	155	177	218	136	173	137;184	100;103	131	218	152	103
1887	Mayara C	Andara	Kavango	Namibia	176	195	158	227	171	198	162	165	206	140	182	157		110	155	168	197	146	206;200;182;203	165	103	131	212	176	100	268
1888	Mayara C	Andara	Kavango	Namibia	173	208;202;198;195;192	170;167;176	242	179;171;174	201;198	162	162;165	212;206;221	125;122	179	154	190;187;184	107;110;120;101	164;172	152;165;168	194;197;200;203	139;149;143	206;173;152;179;176;200;185	137;147;168;187;184;171	110;100;122;103	134;128;131;137		170;173;179;182;161;158;164	113;103;107	244;235;271;250;247;253
1890	Mayara C	Andara	Kavango	Namibia	179;173	198;195	167;176;161	227;242	171	198	162;156	162;165	206	128;122	179	157	187;184	88;107;110;104	164;155	171;152;168	194	136;139	173;152;179;176;182	174;165;184;171	110;113;103	118;121;128;125		179;176;161;158;155;164	103;107;100;97	244;229;247;265
1891	Mayara C	Andara	Kavango	Namibia	176;173	198;192	170;173;176	258;242;245	174	198	165	165	206;215	125	182	160	187;184	101	146;155	152	224;200	139	179;191	174;177;171	110	134;121;125	215;221;218	158	103
1893	Mayara C	Andara	Kavango	Namibia	173	195	170	242	171	198	162	155	206	134	182	160	187	110	155	155	215	158	197	199	100	121	205	191;140;158	107
1894	Mayara C	Andara	Kavango	Namibia	173	192	170	227	171	198	156	162;165	218	122	179	157	184	101	155	177	212	136;158	188;191	181	100	118;131	209	146;101	103
1897	Mayara C	Andara	Kavango	Namibia	173	195	164	227	171	204	168	162	212	128	179	160		120	164	152	206	136	197	174	106	121	218	176	100	283
1898	Mayara C	Andara	Kavango	Namibia	176;173	189;195	170;173	242;245	171	201;198	162;156	162;165	212;206;218	131;125;122	179;167	157;160;175	187;184	110;113;101	172;155	152;177;165;168;155	218;200;203	139;149	173;152;179;191;170	174;190;171	94;110;106;113;97;91	118;128;115;125	215;209;205	170;173;167;152;161	103
1901	Mayara C	Andara	Kavango	Namibia	173	198	167	227	171	201	162	162	206	128	182	157	187	113	155	152	218	136	182	171	103	121		170	107	286
1902	Mayara C	Andara	Kavango	Namibia	173	198;195	170;176	258;242	171	198	162;165	168;162	212	125	179	157	187;184	91;101	164;155	180;177	203;212	152;136	179;200;182;203	174;177	110;100;106	121	205	170;167;149	107;100
1903	Mayara C	Andara	Kavango	Namibia	173	198	170	242	174	198	168	162		128	176	157	184	113	155	165	200	136	170	174	110	121	215	158	103	268
1908	Mayara C	Andara	Kavango	Namibia	173	189;192	170;167;164;185	258;242	171	198	162;165	162;165	212;206;221;215;209	125;122	179;182	160	187	110;101	164;155	165;168	218;194;203	152;136;139;143	173;176;191;194;197;170	174;187;184;171;150;196	100;106;122	121;128;125	215;205;218;224	167;158;164	103;107
1910	Mayara C	Andara	Kavango	Namibia	173	192	176	242	171	198	159	162;165	212;206	122	179;182	157		120;101	164;155	152;165;168;155	194	143	173;152	174;171	110;106	121;125	209	173;158	103;100	280;253
1913	Mayara C	Andara	Kavango	Namibia	176;173	198;195	170;167;176;179;188	227;242	171	201;198	168;162;165;156	162;165	212;206;215	134;131;119;128;125;122	179;182	157	187;184	123;107;129;110;113;120;104	164;155	152;177;165;168	215;194;197;200;203;191;209	136;139;133;143	173;179;176;185;197;170;182;167	174;168;165;184;177;171	100;106;113;103;97;91	134;121;128;131;125		143;170;167;152;149;161;158;155;164	94;103;107;100	280
1921	Mayara C	Andara	Kavango	Namibia	173	198	167	227	171	198	159	165	206	131	182	160		101	155	168	197	143	200	140	82;110;85;88	134	209	167	103	265
1922	Mayara C	Andara	Kavango	Namibia	173	198	167	227	171	198	159	165	206	131	182	160	184	101	155	168	197	143	200	140	110;85	134	209	167	103
1923	Mayara C	Andara	Kavango	Namibia	173	192	164	242	171	198	162	165	206	131	182	154	187	120	164	165	197	139	179;176	181	106	121	215	161	107
1931	Mayara C	Andara	Kavango	Namibia	176;173	198;192	173;167	242	171	201;198	162;165	162;165	209	128	179;182	157	187	91	155	177;168	197;191	139;146	185;170	165;171	110;119	121;131		173;176;158	100	253
1932	Mayara C	Andara	Kavango	Namibia	173	189	173	258	174	226	165	165	206	128	179	157	184	110	164	189	197	139	176	184	113	128	218	161	103
1933	Mayara C	Andara	Kavango	Namibia	182	192	179	242	171	198	162	162	212	125	179	157	187	110	164	152	197	136	182	171	110	121	205;224	155	103;97
1936	Mayara C	Andara	Kavango	Namibia	173	189	170	227	171	201	162	165	221	125	182	157	187	101	155	177	206	136	188;191	137	94	131		161	103;107;100	271
1937	Mayara C	Andara	Kavango	Namibia	173	192	185	258	168	198	156	165	212	131;119	182	157	190;187	129	164	165	200	155	179	181	100	125	221;218	173	103;100
1938	Mayara C	Andara	Kavango	Namibia	173	195	167	258	171	198	162	165	212	122	167	157	187	120	155	168	194	136	176	190	106	118	205	173	113
2165	Mayara C	Andara	Kavango	Namibia	173	198	170	242	171	198	165	165	206	128	179	157		129	155	177	206	146	185	140	103	118;115	205	164	103	268
2241	Shadikongoro C	Andara	Kavango	Namibia	173;164	187;189;195	167;176	242;273	171		165;156	165	221;197;203;215	134;131;125;122	179;182	160	187;184	113;104;101	155	152	209	143	179;176	171	113;103	121	215;218	149	94	268;271;262;250;265
2242	Shadikongoro C	Andara	Kavango	Namibia	173	192	167	258		201	162	165	212	122	182	157	187	101	155	155	203	149	176	190	113	118	205	158	103	268
2243	Shadikongoro C	Andara	Kavango	Namibia	173	187;195	170;167;179	242	171	201;198	162;156	162;165	212;206;215	122		157;160	187;184	129	164;155	168;155	197;203	136;139;133;149;146	173;152;179;176	177;171	113;119	134;121;128;112	209;205	143;170;158	103;107;100	268;271
2244	Shadikongoro C	Andara	Kavango	Namibia	173	195	170	258		201	162	165	206	137	179	160	187	98	164	155	197	146	170	177	110	131	212	164	107	274
2266	Shadikongoro C	Andara	Kavango	Namibia	173	192	167	242		201	162	162	221	122	182	157	187	120	152;155	168	194	158	173	165	110	121	205	176	103	271
2286	Shadikongoro C	Andara	Kavango	Namibia	176;173	198;195;192	170;173;167;161	227;242	171	201;198	162;165	155;162;165	212;206;203	125;122	179;182	157;160;154	187;184	126;88;110;91;116	164;155	152;168;155;140	224;194;197;203	130;136;146	173;176;170	174;168;165;177;171	100;113;103	143;128;131		167;161	103;100	268;289;271;274;250;253;256
2291	Shadikongoro C	Andara	Kavango	Namibia	176;173	198;195	167;161;158;185	261;227;258;242;245	171;174	204;201;198	162;159	155;162;165	212;206;221;203;209	119;125;122	179;182	157;160;154	187;184;178	88;110	164;155	152;177;165	197;200;203;212	136;139;143;146		193;168;165;177;171	106;113;103;116	121;128	212;218	152;158;164	103;100	268;271;274
2360	Andara DH	Andara	Kavango	Namibia	173	195	170	242	171	198	162	165	206	128	182	157	187	101	155	168	197	139	152;200;146	165	94;106	121	209		103;107	268;238;253
2378	Biro C	Andara	Kavango	Namibia	176;173	198;192	164	242	171;174		162;165	162	206	134;128	188;182	157	187;184	129;110	164;155	152;165	194;197	130;146	197	174;171	100;103;116	118;121	215	158	103	268;271;253
2381	Biro C	Andara	Kavango	Namibia	173	187;198	161;179	242	174	204;201	162	162;165	215;209	134;128		157	184	132;129;120	164;155	165;168	215;194;197	139	179;170	165;181;171	110;100;119	128	218	158	103;107	271
2387	Biro C	Andara	Kavango	Namibia	176;173	195	176	258;242	174	219	162	162;165	206;209	131;128;125	179	157		129;110	164;155	177;165	218;197	136;139	176;191;182	184;171	116;91	121;112;131	218	152;158	103	274
2388	Biro C	Andara	Kavango	Namibia	176;173	198;195;192	167;164;158	258;242	171		162;159	162	212;206;221;215	128;125	179;182	157;160	187;184	129;110	164;155	152;165;155	197;200;206	130;146	176;191;185;197;170;182	174;184;171	100;113;116;91	134;121	215;209	161;158	103;110	268;271;274
2395	Shadikongoro C	Andara	Kavango	Namibia	173	187;198;195;192	173;176;161;179;164	242;211	171	201;198	162	165	212;206;215	128;125;122	179;182	157;160;154	187;184	129;110;120;101	164;155	177;165;168;162	194;197;203	136;139;158		168;177;171	106;119;103;116;97	121;125	215;221;212;209;218	179;176;161;158;164	103;107;110	268;271;274;253
2398	Biro C	Andara	Kavango	Namibia	173	198	173	227	171	204	162	162	212	125	179	157	184	120	155	168	221	149	203	171	91	125		149	103	271
2401	Biro C	Andara	Kavango	Namibia	173	195	176	258	174	219	162	162	209	128	179	157	187	129	155	177	218	136		184	91	131	218	152	103	274
2403	Biro C	Andara	Kavango	Namibia	176	198	167	242	171	201	168	162	212	122	182	157	187	101	155	168	200	139	179;176	184	106	115	209	176		280
2420	Shadikongoro C	Andara	Kavango	Namibia	173	195;192	173;167	227;258;242	171	204;201;198	162;156	165	212;215	119;122	179;182	160		107;110;120	155	152;165;168;155	197	152;133;143;146	179;176	168;165;171	100	121;128	205	152;161;158;155;164	103;100	265
2421	Shadikongoro C	Andara	Kavango	Namibia	176;173;164	198;195;192	170;173;167;161	227;258;242	171	201;198	162;165;156;159	162;165	212;206;215	119;128;125;122	179;182	157;160	187;184	107;110;120;101;116	164;155	152;177;165;168;155	197;203;206	136;139;133;143;146	179;176;194;182	174;190;165;177;171	110;100;106;113;122;119;103	134;121;128;125	205;218		103;100	262;250;247;265
2430	Biro C	Andara	Kavango	Namibia	176;173	198;195;192	173;167;176	258;242	171;174	201;198	162;165;156	165	212;206	134;125;122	185;188;179;182	157;160	187;184	107;110;113;91;104;101	164;181;155	152;165;168;155	194;197;200;206	130;139;133;149;143;158	191;170;182	168;171	110;100;106	118;121	221;212;209;205;218	170;149;176	100
2432	Biro C	Andara	Kavango	Namibia	176;173	198;192	173;167;176	258;242	171;174	201;198	162;165;156	162;165	212;206	134;125;122	188;179;182	157		110;91;101	164;155	152;155	194;197;200	130;139;143	200;191;194;170	168;171	110;100;88	118;121;125	221;212;209;205;218	170;173;161	103;100	268;271
2437	Shadikongoro C	Andara	Kavango	Namibia	173;164	195;192	167	227;242	171;174	198	162;165	165	212;206		179;182	157;160	187;184	126;107;110;91;120;101;116	155	152;177;165;168;155	197;200	136;133;143;158	179;185;182	184;171	110;106;113;119	134;140;128;125	221;212;209;205;218	149;176;161;158	103;100	262;250;247;265
2438	Shadikongoro C	Andara	Kavango	Namibia	176;173	189;195;192	173;167;176	227;258;242	171;174	201;198	162;156	165	212;215	119;128;122	179;182	160	187;184	120;101	155	152;177;165;168;155	197;203	152;143;146		174;168;165;177;171	110;100;119	140;128;125	221;209;205;218	173;161;158	103;100	265
2441	Shadikongoro C	Andara	Kavango	Namibia	176;173;164	198;195;192	173;167;164	227;258;242	171;174	201;198	162;165;156	162;165	212;206;215	131;119;128;125;122	179;182;167	157;160	187;184	107;129;110;91;120;101	164;155	152;165;168;155;162	197;200;203;206	130;136;139;133;149;146;158		174;168;181;171	110;100;106;113;103	118;134;128;131;125	212;209;205;218	173;149;176;161;158	103;107;100	247;265
2444	Shadikongoro C	Andara	Kavango	Namibia	176;173;164	189;195;192	173;167;161;164	227;258;242	171;174	201;198	162;159	165	212;206;197;203;215	119;128;125;122	179;182	157;160	184	110;120;101	164;155	180;177;165;168;155	197;203	136;139;143		174;177;171	110;100;113;119	134;128;125	209;205	170;167;182;161;158;164	103;107;100	268;250;247;253;265
2445	Biro C	Andara	Kavango	Namibia	176;173;164	198;189;195;192	173;167;161	227	171;174	201;198	162;159	165	212;206;197;215	119;128;125	179;182	157;160		107;110;120;101	164;155	152;177;168;155	197;203	136;133;143	173;179	171	110;106;113;119	134;128;125	209;205;218	170;167;161;158	103;107;100	247;253;265
2446	Biro C	Andara	Kavango	Namibia	173;164	198;195;192	170;167;179	227;242;236	171;174	201;198	162;165	165	212;206	131;128;125;122	179;182	157;160;154	187;184	107;110;120;116	164;181;155	152;165;168;155	215;197;200;206	136;139;133;158	173;179;176;200;191;170;182;203	184;177;171	110;106;122;119	121;128;125	215;212;209;205;218		103;107;100	244;262;250;247;253;265
2455	Biro C	Andara	Kavango	Namibia	173	198	161	242	171;174	201	165		221	131;125	182	157	184	91;120	164;155	152	197;200;206	139	173;194	171;156	106	131	205	158	103;100	265
2458	Biro C	Andara	Kavango	Namibia	176;173	198;192	167;176	227;242	171;174	201;198	162;165;156	165	212;206;215	134;131;128	188;179;182	157;160	187;184	110;113;91;101	155	152;165	194;200;206	130;136;139;143;158;124	173;191;194;170	168;187;181;171	110;100;106;103	118;128;125	215;212;209;205		103;100	271;262;250;247;253;265
2459	Biro C	Andara	Kavango	Namibia	173	195;192	167	242		198	174;162	165	212;206	125;122	179	160	187;184	107;110;91;120;104	181;155	152;168;155	197;200	133;143;158	179;182	177;171	110;106;113	134;128;125	212;209;205	136;149;176	103;100	247
2460	Shadikongoro C	Andara	Kavango	Namibia	173	195;192	167	242	171	201;198	162	165	206;215	131;128;125;122	179	160	187;184	107;110;113	181;155	152;168;155	197;200;206	133;146;158	185;182	190;177;171	110;106;113	134;125		173;149	103;100	244;274;247
555	Old Bagani C	Andara	Kavango	Namibia	176;173	202;198;189;195;192		242	165;171	201;198	162;165;156	162;165	212;215	134;119;128;122	179;182	157;160	187;184	110;120;101	164;155	152;177;165;168	218;200	130;136;143	173;152;176;194;197;170	174;165;184	136;106;103	121;128;125	215;212;209;218		113;103;107;100	268;262
567	Shadikongoro C	Andara	Kavango	Namibia	176;173	198;195;192	170;167	242	171	198	162;165;159	165	212;206;215	131;119;122	179;182	157;160	187;184		164;155	177;165;168	215;218;197	130;136;139;143;158	173;152	174;181;171;150	100;106;113;119;103	134;121;128;115	215;212;209		113;103;107;100	268;271;256
568	Old Bagani C	Andara	Kavango	Namibia	176;173	198;195;192	170;173;167	227;242	171;174	201;198	162;165;159	165	212;206;215	119;128;125;122	179;182	157;160	187;184		164;172;155	152;177;165;168;155	218;197;206;212	130;136;139;149;143;146	173;152;191	174;143;168;181;177;171;150	106;113;119;103	118;134;121;128;115;137;125	209;218		103;107;100	268
569	Old Bagani C	Andara	Kavango	Namibia	173	192	167	248	174	198	162;165	165	212;221	122	179;182	154	184		164;172	155	197	130;149	179	187	106	128	205		103;107;100	268
619	Divundu C	Andara	Kavango	Namibia	173	202;195;192	170;167		171	198	162;156	165	206;221;209	131;122	179;182;167	157;154		98;110;113;101	164;155	152;165;155	197	152;139	173;185	171	133;106;113;103	118;134;128	215;212;209;218	170;167;149;161;158	103;107;100	274
723	Kangongo C	Andara	Kavango	Namibia	173	195;192	170;173;167;176;179	227;242	171	201;198	162;165	162;165	206;218;215	119;128;122	179	157;154	187;184;178	129;110;91;120	164;146;155		200;191;206;212	130;136;139;149;143	173;179;176;200;191;194;197;170;182;203	168;177;171		118;134;121;131;125	215;209;205;218	173;179;176;164	103;107;100;110;97	286;268;280;262;253;265
1044	Andara DH	Andara	Kavango	Namibia	173	198	161	258	171	198	162	155;162;159	206	137	179	160	184	82;139	164		197	139	164;161	181;184;177		121	215	173;176	97	277
1050	Andara DH	Andara	Kavango	Namibia	173	192	161;164	242	171	201;198	162;165	165	206	134;131	179	154	187	126;129;110;120	146	165	197;165	139	173;176;170	174	119	140;137	218			268
1054	Andara DH	Andara	Kavango	Namibia	173	208;192		258	171;174	198	165	162;165	221	122	179;167	160	184	139;101	164	168;155		130;139	173;152;179;200	187	100;122	121;125	221;205	109;152;149;161;164	100;97	268;262;253
1055	Andara DH	Andara	Kavango	Namibia	173		176	242	171		162	165	206	125	182	160	184	91	164	152	206	143	182	171	110	118	224	176;164	103;100	277
1059	Andara DH	Andara	Kavango	Namibia			173;164	242	171	201	165	162	206	140	179	157	187	110	164	152	197	139	179;176;182	168	116	121	212	164	94	247
1061	Andara DH	Andara	Kavango	Namibia	164	195	173	242	191;171	201	162;159	165	206	143;140;137;122	157;179	157	187	110;120;101;116	172	155	162;200	136;139	179;188;191	177	116	134;137	205		107;110
1063	Andara DH	Andara	Kavango	Namibia	173		167	242	174		168;162	168;165	206	128	173	160	187	113	164	143	197	149	179;176	187	100	134;125	215	161	107	271
1064	Andara DH	Andara	Kavango	Namibia	173	195		258		198	165	165	212	122	182	160	184	101	164	168;155	218;197	139	173	174;184	113;122	121	221;218	188;161	94	253
1073	Andara DH	Andara	Kavango	Namibia	173	198		227	174	204	162	165	212		179	160	184	110	155	177	200	133	194	187	113	131	215	167	113	256
1079	Andara DH	Andara	Kavango	Namibia	179	192	158	242	174	201	162	165	197	140		166		110;113	143;140;137;146	168	197	155	173	196	106	118;128	221;212;209;205	179;182	103;107;100;110	274
1080	Andara DH	Andara	Kavango	Namibia	176	195	167	236	171	198	162	162;165	206	122	179	157	184	91	164		187;162;191	149	194	137		118	209	158;155	122;116;119	268
1081	Andara DH	Andara	Kavango	Namibia	173	195	158	242		198	162	165	206	122	167	163	187	110	143;134;140;137;146	168	194		176	190	116	131	215;221;212;209;205	161;158	107;100;110	286
1088	Andara DH	Andara	Kavango	Namibia	173	189	176;185	227		201	165;159	165	206	131;125;122	179	157	184	101	164	168	206	143	197	181	110;122	140	209;205		103;100	286
1099	Andara DH	Andara	Kavango	Namibia	173	192	173	273	171		165	162	197	128	179	160;154		113	164	168	203	136	176	171	116	131	218	170	103	265
1113	Andara DH	Andara	Kavango	Namibia	173	204	158	258	174	201	165	162	206	131	179	166	184	110	134;137	177	200	155		184	116	121	209	158		274
1293	Divundu C	Andara	Kavango	Namibia	173	189		227;242	171	201;198	162;165	168;165	206	131;128	182;167	157;160	187;184	110;120	155	177;165	209;212	152;139	206;173;152;185	174;184	100;106;116	128	221;218;224		103;100	268;265
1355	Divundu C	Andara	Kavango	Namibia	173	198;195		227;242	171;177	201	162;156	162;165	206;197		179;182;167	157;160;154	187;184	110;120	164;155	165;168	194	139;146	173;179;191;197;170	165;171	100	121;112	221;209;218	136;146;140;134;170;149;155	103;100	268;274;250
1379	Divundu C	Andara	Kavango	Namibia	173	198;189;195;192		242	171;174	198	162	165	206	122	179;182	157;160		129;110;113;91;120;101	164;155	152;168;155;162	162;156;159;197;200;206	152;139;143	179;176;200;197;182;203	171	106;103;116;97;91	118;134;128;115;125	215;221;209;205;218;224	179;176;158;155	103;107;100	244;268;271;229;274;247;265
1390	Kangongo C	Andara	Kavango	Namibia	176;173;164	189;195;192	170;167;161	242;251	171;174	198	162;165;156	162;165	212;215;209	143;131;128;125;122	179	157	187;184	94;98;110;113;101;116	155		194;197;200	139;149;143;146	179;176;200	168;184;177		134;128;115;125	215;212;209;205	136;146;149;182;161;155	103;100;110	268
1415	Kangongo C	Andara	Kavango	Namibia	176	204	173	258	174	201	165	165	215	134	182	157	184	98;101	164	171	200	139	176	174	110	125	218		103;100
1439	Kangongo C	Andara	Kavango	Namibia	173	189	173	242	174	201	162	165	215	125		163		91;120;101;116	155	168	162;203	146	179	140	113	134	205	170;161	103	250;247
1458	Kangongo C	Andara	Kavango	Namibia	173		170	258	174;196		162	162	215	122	179	160	184	116	155	152	203	146	194;197	196	103	134	224	136;140;134	110	268
1460	Kangongo C	Andara	Kavango	Namibia	173	195	167	242		198	162	165	212	125	179	160	187	107;104	155	152	162;197	130;133		171	106;103	121;125	212	176	100	247
1489	Kangongo C	Andara	Kavango	Namibia	176;173	198;195	173;167	242	171;174	223;204;219;201;198	162;159	162;165	224;212;203;215	128;125	185;179;182	157	184	110;120;101	164;155		215;162;221;218;194;197;200;209	136;143	173;179;176;200	184;177		121;128;131	215;205;218	146;152;161;158;155;164	103	268;271;253;256
1514	Kangongo C	Andara	Kavango	Namibia			170;167;176;185	227;258;242	171;174	204;201;198	162;165;159	162	206;218	131;119;128;122	179	157;154	184	129;110;101	164;155	165	197;203;206;209	152;136;143	173;179;176;188;200;191;197;170;182	168;181;184	116	121;128;125	215;221;209;205;218	173;182	103;100;110	268;274;250
1647	Old Bagani C	Andara	Kavango	Namibia	173	192	176	258	171	198	162	165	206		179	157		91	164	155	200	143	200	171	106;103	121	221	121;170	100;97	271
1650	Mutjiku C	Andara	Kavango	Namibia	173	192	167;161	245	171	198	162;165		212	125;122		157;154	184	110;120;101	164;172	168;155	215;197	149;155	179;176	171	106	128;115	221;205	161;164	103;107	286;268
1665	Mutjiku C	Andara	Kavango	Namibia	173		164	242	171		162	165	215	131	179	157;154	187	110	155	168	203	146	179	171	106	131	215	182	97	247
1671	Old Bagani C	Andara	Kavango	Namibia	179;173	187;198;195		227;258;242		201	162;165;156	165	212;206;218;215;209	131;128;125;122	185;179	160	187;184	139;110;91;120	155	152;165;168;155	194;197;203	152;136;149;146	152;179;176;170	174;181;184;171	94;97	128;115;125	215;212;209;205	143;152;161;155;164	103;107;100	271
1695	Mutjiku C	Andara	Kavango	Namibia	173	198	161	242	171	201	162;165	162;165	212;221	128	179;182	157;160	187	110	155	177	191	139	173	165		121;115	218		113;103;110	268
1748	Biro C	Andara	Kavango	Namibia	176;173	198;195;192	167;176	227;242	165;171	201;198	162;165;156	165	212;206;215	134;131;128;125	188;179;182	157;160		110;91;120;101	164;155	152;165	194;197;200;206	130;136;139;158	173;176;191;194;197;170	168;181;171	110;100;106;103	118;134;121;128;125	215;212;209;205;218	170;173;158	103;100
1866	Mayara C	Andara	Kavango	Namibia	173	192	173	258	174	201	156	165	206	128	179	160	184	120	155	168	215	136	176		110	128		143;140	103	271
1871	Mayara C	Andara	Kavango	Namibia	173	192	161	242	171	201	165	162	212	128	179	157		101	155	152	200	158	182	165	110	125	218	170	103
1889	Mayara C	Andara	Kavango	Namibia	173	198	167	227	171	198	159	165	206	131	182	160	184	101	155	168	197	143	200	140	110	134	209	167
1909	Mayara C	Andara	Kavango	Namibia	173	192	164	258	171	201	162	168	221	125	179	160	187	120	152;155	168	212	139	176	177		121	205	161	103;100
1914	Mayara C	Andara	Kavango	Namibia	176;173	195	170	245	171		156	165	212	131	182	157	184	120;101	152;155	152	200;203	139;149	197	171	113	118	215;209;205	170;152	103
1934	Mayara C	Andara	Kavango	Namibia	173	198	173	248		201	162	165	215	122	182	160	184	113	155	177	191	143	182	165	110	125		188	103;100	247
2287	Shadikongoro C	Andara	Kavango	Namibia		187;198;195;192	170;167	230;227;258;242;245	171;174	204;201;198		155;165	212;206;221	125;122	185;179;182	157;160;154	187;184;178	88;110;113;91	164;155	152;177;165;168	224;212	136;133;143;146	185;170;182	174;168;165;171	100;113;122;116;91	128;131	218	167;152	103;100	268;271
2290	Shadikongoro C	Andara	Kavango	Namibia	176;173	198;189;195;192	170;161	227;258;242;245	171;174	201;198	162;165;159	162;165	212;206;209	119;125;122	179;182		187;184	88;110;113;91;120	164;152;155	152	224;215;194;197;200;212	136;139;143;146	173;176;185;170;182;161	193;168;165;177;171	110;113;122;103;116	128;131	221;209;218	112;170;173;167;152;161;158;155;164	103;107;100
2320	Andara DH	Andara	Kavango	Namibia	173	192	167	258	171	201;198	162	165	206	122	182	157	187	101	155	155	200	136	146	174	122	131			107	250
2327	Kangongo C	Andara	Kavango	Namibia	176	195	167	242	174	219	162	165	212	131;128;125	182	157	184	110	164	177	218	143	152	184	103	131			103	256
2332	Shadikongoro C	Andara	Kavango	Namibia	173	195	170	258	171	198	162	162	215	137;125;122	179	157	187	110;120	164;155	155	200	130	200;158;161;146	171	103	134	205			268
2355	Shadikongoro C	Andara	Kavango	Namibia	173	192	173;167;176	227	171	198	156	162;165	206	125;122	179	157;154	187;184	101	155	165;168;155	194;200	152;136;139;149	149;146	174;190;187;177	106;113;122;97	125			103;107;100	268
2372	Shadikongoro C	Andara	Kavango	Namibia	173	198	161	258;242	171;174	201;198	165	165	206;197		179	157	187	120	164	155	203;206	139	176;182	181	97	128;125	212;218	161	103
2389	Biro C	Andara	Kavango	Namibia	173	189	167	227	171	198	156	165	212	122	179	157		110;113;104;101	155	152	203	146	194;161	181	116	134;128	209		103	271
2418	Shadikongoro C	Andara	Kavango	Namibia	173	189;195;192	173;164;191	242;211	171	204;201;198	162;156	165	212;206	119;122	179;182	157;160	187;184	129;110;120	164;155	152;165;168;155	221;218;194;197;203	152;136;139;143;146		174;165	110;100;113;103;116	121;128	205	173;152;176;161;155	103;100
2424	Biro C	Andara	Kavango	Namibia	173;164	198;195;192	170;167;161	227;242		198	162;165;156	162;165	212;206	119;125;122	179;182	157;160	187;184	107;129;110;113;120;101;116	155	152;165;168;155;189	197;206;212	136;139;143;146;158	152;179;182	168;177;171	110;100;106;122;119;91	134;121;128;125	212;209;205;218	167;149;158	103;107;100
2443	Shadikongoro C	Andara	Kavango	Namibia	173	195	167	227		198	162	165	212	128	179	157	187	110	155	168	197	143	179	171	119	128	218		103	265
2454	Biro C	Andara	Kavango	Namibia	176;173	198;192	167;164	242	171;174	201;198	156	165	206	125	179	157		110;91;120;101	164;155	152;165;168;155	197;200;206	130;139;143	173	168;171	110;100;106	118;134;121;128;125	215;205;218	149	103;100
547	Divundu C	Andara	Kavango	Namibia	173		179	227;258	174	201	176	165		131;128	179	157	184	110;120;101	164;155	180	203;206	136	176;197	187;181;184	113	115;125	212		110	238;241;274
570	Divundu C	Andara	Kavango	Namibia	173	195		242	171	201	156	165	206	128	179;182	157	187	101	155	152	206	139;149	179	187	103	121	218		103
593	Old Bagani C	Andara	Kavango	Namibia	173	189	170	258	171	198	162	165	221	128			184	101	164	168	197		197	165	119	121	218	161;158	103	277
615	Old Bagani C	Andara	Kavango	Namibia	173	202	164	273	171	201	162	165	215	128			187	120	155	168	215		170	190	100	121	212	164	103	265
1047	Andara DH	Andara	Kavango	Namibia		195;192	176;161	227	171	201		165	212;215	131;122	179	157;160	184	91;101	155	158;152;177;183		136;139	191;182	174;187;184	110;106;103	134;125	221;209	170;161;158	103;100	271;250;247
1068	Andara DH	Andara	Kavango	Namibia	179		167	242	174	201		165		140	182	157	187	113	155	168	197	146	173	143;196	106	128	212	179;182	100;97	274
1069	Andara DH	Andara	Kavango	Namibia	173		188	227	171	198	165	165		122	179	160	187	116		180	212	136	191	165;162	106	128	215	158	103	268
1107	Andara DH	Andara	Kavango	Namibia	173		173	258	174		162	162	212		179	157	187	101	155	155	206	139	176	190	100	121	221	164	100	292
1378	Divundu C	Andara	Kavango	Namibia	176;173	198;195		227;245	171;174		162;165	162	224;206;230	119;128;125;122	157;179;182	157;160	184	110;101	155	152;165;155	197	152;136;139;133;143;146	173;185;182	181	110;100;106;97	121;140;131;125	209;205		103;107;100;97	292;268;238;271;241;274;277;262;253;265;256;259
1393	Kangongo C	Andara	Kavango	Namibia	176	192			171	198	162	165	206	140;122	179;167	160;163	184	120	164;155	155	206	139;143	200;197	187	94	128	218		103;100	265
1414	Kangongo C	Andara	Kavango	Namibia	173	192	167	258		201	159	165	206	134		163	184	120	140	152	197		173	177	113	134	209	176	103;100	283
1471	Kangongo C	Andara	Kavango	Namibia		202;198;195;192;204	173;167;161;185	227;242	171;174	201;198		168;162;165	206;215	134;131;119;128;122	185;179;182	157;154	187;184	110;101	164;155	152;177;168		152;136;139;146;158	179;176;200;191;185;197;170;182;203	168;177;171;156	100;106;113;119;103;116	121;128;131;125	215;209;205;218	136;158	94;103;100	268;274;277;262;250;265
1668	Old Bagani C	Andara	Kavango	Namibia	176;173	198;195	170;161;158	242	171;185	201	162;165	165	212;206	134;131;122	160;179;167	163	184	98;101	146;155	168;155	200	136;139;146	179;188;185;182	174;165	110;106;116	115;131				268;274;277
1691	Old Bagani C	Andara	Kavango	Namibia	173	198	161	227;242	165	201;198	162;165	162;165	212	112				113;120;116	164;172	177	197;200	139	176;200;197	174;140	110;91	128;131	209;205	173	100	247
1853	Mayara C	Andara	Kavango	Namibia	173	195;192	176	242		198	168	165	209	143	182	157	178	120	155	168	194	146		181	106;119	128		170;155	107	241
1925	Mayara C	Andara	Kavango	Namibia	176	192	176	258	174	201	162	162	206	137	182	160		101	164	152	197	146	185	171		140	205	176	110
2222	Shadikongoro C	Andara	Kavango	Namibia	173	192	170	242	171		153;150	165	221	131	182	157	187	120	155	152	194;197	139	173;170	140	110;100	121		176		265
2302	Shadikongoro C	Andara	Kavango	Namibia	173		173;158	227	171	198	162	162	206;197	125;122	179	157;160	187	101	155	152;165;189	197;212	136;139;149	149	174	94;125;100;88	125			103;107	250;253
2346	Andara DH	Andara	Kavango	Namibia	173	192	167	242	171;174	198	165	165	212	122	179;182	157	187	101	155	165;155	197	136;149	146	174;190	106;122	121			107
2358	Andara DH	Andara	Kavango	Namibia	173	187	170;167;179	227;242		198	162	162;165	212;215	149;122	179;182	157	187;184	98;129;101	164;155	152;165;168	197	136;139;149	152;146	171	94;106;122;119	121;128			103;107;100	271
2364	Kangongo C	Andara	Kavango	Namibia	173	187;192	170;167	227;242		201;198	162;159	162;165	212;206	128;122	179;182	157;160	187;184	94;98;110;101	164;155	152;165;168;155	197;200;206	136;139;149;143	170;146	174;190;165;171	94;100;106;113;122;119	121			103;107;100	238
2366	Shadikongoro C	Andara	Kavango	Namibia	173	189;192	170;167;185	227;242	171	204;201;198	162;159	162;165	212;206	122	179;182	157;160	187;184	98;101	155	152;165;168;155	197;200;206	152;136;139;149;143		174	94;100;106;113;122	121			103;107;100	232;235;238;250;247;253
2405	Biro C	Andara	Kavango	Namibia	173	202	167;161	227	171	201	165	165	212;206		179	157;160		126;120	164;172	165	203	139;146	191;170		106	128;131	215	158;155	103;100	271
2416	Shadikongoro C	Andara	Kavango	Namibia		189;192	173;164;185	242	171;174	204;201;198		162	206;197;215	119;122	179	160	187;184	110;120;101	155	152;165;155	197;203	152;136;143	173;152;179;176;197	174;168;165;171;196	110;100;103	128;125	215;205	167;152;176	100;110
2433	Biro C	Andara	Kavango	Namibia	173	192	164	258	171	198	162	165	206	134	179	157		91;101	155	168	197	139		165	82;94;110;85;106;88;91	121;137;125		176	103;100	268
2456	Biro C	Andara	Kavango	Namibia	176;173	198;192	167	242	171	201;198	165;156		212		179;182	157;160		110;91;101	164;155	152;155	194;197;200;206	130;136;139;143;158	191;194;170	168;171	110;100;103;116	118;134;121;128;125	209;205;218	188;170;173;161	100	268;265
616	Old Bagani C	Andara	Kavango	Namibia	173	202;195;192		242	171	201;198	143;162;165	162;165	212;221;215	128			187;184	110;120;101	164;155	152;168	215;197;206		155;173;170;149	190;181;184	100;106	121;128	212;209;205	136;146;167;149;155;164	103;107	268;253;265
1051	Andara DH	Andara	Kavango	Namibia			167	242	174	201	162			140	182	157	187	113	155	168	197	146	173;176;170	196	106	128	212	182	100	274
1539	Kangongo C	Andara	Kavango	Namibia	173	189;195	170	227;242	182;171		150;162	165	203;209	131;119;122			184	107;98;110;91;101;116	164;155	152	200		179;185;182	174;171	100;106;103	121;125	209	164	94;97	268;271;253;265
1733	Mutjiku C	Andara	Kavango	Namibia	176	195;192	170		171	198	165	162	212;206	131;125;122	179	157		120;104	155	165;189	194;212	136	179;176;182	174	125;100;97;91	128;125			107	271
1743	Shadikongoro C	Andara	Kavango	Namibia	173;164	195;192	173;167;164			201;198	162;159	165	212;206;197;215	125;122	179;167	157;160	187	91;101	164;152;155	152;177;165;168	197;203	139	173;194	177;171	110;100;106;113;103	128;125	205		107;100
1875	Mayara C	Andara	Kavango	Namibia	173	195;192	167	242	171		156	165	206	128	179	157;163		110;120;116	164;155	168	194	136;143	176	193;168	110;97	128;131			110	268
1881	Mayara C	Andara	Kavango	Namibia	173	195	167	242		201	165	165		125	179	160	184	113	164	155	200		182	184	110	134;121		176	103	232;235;256
1935	Mayara C	Andara	Kavango	Namibia	173	198;192		276;227;242	171;174	204;201;198	162;165;159	162;165	212;206	134;119;128;125	179;182	157;160	187;184			165;168	215;209;212	136;139	173;152;191;170	174;177;171	94;100;106;113	134;128;131		115;149;161;158;155	103;100	244;280;247;265
2289	Shadikongoro C	Andara	Kavango	Namibia	176;173	187;198;195;192	161	227;242		201;198	162;165	165	206;215	125;122	179;182		187;184	123;129;110;113;120	164;152;161;155	152;168	194;197	139;133;146		165;171;196	100;113;122;119;116	121;128	227;221;209;205;218	109;112;167;161;158;155;164	113;103;107;100
2347	Andara DH	Andara	Kavango	Namibia	173		167	258	171		162	165	206	122	182	157	187	101	155	155	200	136	146	174	122;88	131			107	250
2404	Biro C	Andara	Kavango	Namibia	173	195	176		174	219	162	165	206	125	179	157		120	155	177	218;212	136	173		100;91	128	215	149	103
2419	Shadikongoro C	Andara	Kavango	Namibia		192	191			201	162;156	165	212	122	182	160	187	110;120	152;155	155	197	152	176		103	121	205	155	103	277
2452	Biro C	Andara	Kavango	Namibia	176;173	198;189;195;192	170;173;167	242	171	201;198	162;165;156		206	131;122	182	157		110;91;101	164;155	152	194;197;200;206	130;139;133;149			110;100;103	118;125	209	170;164	103;100;97	271
2457	Biro C	Andara	Kavango	Namibia	176;173	198;195;192	173;167;176	227;258;242		201;198	162;165;156	162;165	212;206	131;122	179;182	157;160		107;110;91;101	164;146;155	152;177;155	194;197;200;206	130;136;139;133;158	179;191;194;170	168;171	110;100;106;103	118;134;121;128;125		170;173;158;164	103;100
2493	Andara DH	Andara	Kavango	Namibia		195	161	258	171	201		165	212	125		157	187	110	172	177		136	149;146	177	100	118	227	146	103;100	268
2528	Kangongo C	Andara	Kavango	Namibia		192	161	258	171	201		165	206	122		160	187	101	155	155		158	191;146	174	116	140	205	109;101	100;97	244;247
6	Divundu C	Andara	Kavango	Namibia	179;173	198;195;192		227;242		198	162;156;159	162;165	206	131;125;122	179;182	157;160	187;184	129;110;120;104;101		152;165;168;189	194;197;200;212	136;139;149;143;146		174;165;140;150	113;91	121;128	215;209;205;218		103;100	268;271
26	Divundu C	Andara	Kavango	Namibia	173	198		242		198	162	162	206	125	179	157	187	120		189	212	149		174;187	91	128	215		103;107	271
33	Divundu C	Andara	Kavango	Namibia	176	192		242		198	159	165	212	128	182	157	187	110;113		152;155	209	139		168;165	110;106;103	128	209		113;110;116	244;247
35	Divundu C	Andara	Kavango	Namibia	176	192		242		198	159	165	212	128	182	157	187	110;113		155	209	139		168	106	128	209		113;110	247
68	Divundu C	Andara	Kavango	Namibia	179;173	192		227;258;242		201;198	159	162;165	206	122	179;182	157	187;184	110		177;165;168;162	194	143;158		171	94;100;113;119;103;116;97	112;125	221;218		103;100	235;247;253;265
717	Kangongo C	Andara	Kavango	Namibia			185	242	174		162			122	179	160	187;184	120	155	152	203	143	173;170	196	103;116	125	215	176	107;100	253
1084	Andara DH	Andara	Kavango	Namibia			170	242	171	198		162	221	125	182	160		132	155	165	194	136	173	171		131	215	158	103	262
1651	Mutjiku C	Andara	Kavango	Namibia	173		170;167;161;185	242;245	171;174	201;198	162;165			134;131;125;122	185;179;182		184	132;107;139;110;120;101	164;172;155	152;177;165;168;155	194;197;203	136;139;149;155	173;179;176;185;182	187;181;177;171	100;106;122;97	121;128;115;125	215;221;205;218	161;155;164		286;268;277
1697	Mutjiku C	Andara	Kavango	Namibia	176;173	202;187;198;192		227;242	171		162;165	168;165	206		179;182	157	187	91	164;172;155	165;162	197	139	179;176	137;168;165;171		121;115	212	118;121;115;161		250
1718	Mutjiku C	Andara	Kavango	Namibia	173	195	158	227	171;174	201	153;162;165	168;162	212;218;215	134;128	167	160			164;155	165	194	136	176;191	177	110;106;103	134;128				250;247;253;256
2328	Andara DH	Andara	Kavango	Namibia	173	198	161	211		201	159	165	206	119;128;125;122	185	157;160		110;101	155	168	221	139		171	100	121			100	277
2348	Shadikongoro C	Andara	Kavango	Namibia	173	192	173;167	227;258;242		198	162	162;165	206	134;125;122	179;182;167	157;160;154	187;184	101	155	165;168;155;186	197;200	136;139;149	146	174	106;113;122;88;97				103;107;100
2353	Shadikongoro C	Andara	Kavango	Namibia	173		161	211	171	201	159	165		119	179	157	187;184	120	164	168	221	158		174	100;88;91	131			103;100;97	256
2369	Andara DH	Andara	Kavango	Namibia	176;173	195;192	170;173;167	227;258;242		201;198	162;156	162;165	206	122	179;167	157;160;154	187;184	129;110;120;101	164;155	168;155	194;200	130;152;136;139	146	174;171	106;113				103;107;100
2370	Andara DH	Andara	Kavango	Namibia	173	192	170;173	227;242		201;198	162	162;165	206;209	125;122	179;182;167	157;160;154	187;184		164;158	165;168;155	194;197	152;136;139;149;143;155	149;146	171	136;100;106;113;122;97	128			107;100
2379	Biro C	Andara	Kavango	Namibia	173	195	167	258	171	198			206	122	179	157		126	164;155	165	215;218;194;197	139	173;179	171	113	134;140;128;115;131	218		103;100
2392	Shadikongoro C	Andara	Kavango	Namibia	173	187;198;195	173;179;164	242		198	162		206;215	128;122	179;182	157;154	184	129;104;101	164;155	152;177;165;168;162	215;197	152;136;139		177;171	106;97		221;212;209;218	161;164	103;107;100;110
2426	Biro C	Andara	Kavango	Namibia	173	198;195;192	167	258;242	171	201	156	165	206	128		157		110;101	164;155	155	200;206	143;146	173;176		110;100;91	121;128;125		161	103;107
2429	Biro C	Andara	Kavango	Namibia	179	195;192	167	242	171	201;198	162		206;197	128		157		110;113;104;101	164;155	152;168;155	197	130;133;146	173		100;106	128;125	212	182	100
2453	Biro C	Andara	Kavango	Namibia	173	198;192	167	242		201	165;156		212	134;131;125	179;182	157;160	187;184	91;101	164;152;161;155	152;155	197;200;206	139	173;191;194;170	168	110;100;106;103;116		215;209;205;218		103
2462	Shadikongoro C	Andara	Kavango	Namibia	182;176;173	198;189;195;192	167	242		201;198	162;156		212	128;122	179;182	157;160	187;184	107;110;113;91;120;101	164	152	197;200	139;143;146	179;176	140			215;205	170;161	97
2505	Shadikongoro C	Andara	Kavango	Namibia		192	176	242;245	171	198		165	215	122		157	184	120	164	162		146	200;158;146	171	116	134	221		103	268
2518	Andara DH	Andara	Kavango	Namibia		192	161	242	171	198		165	212	122		157;160	184	120	155	165		139;158	146	181	110;106	121	215		103;107	253
2529	Andara DH	Andara	Kavango	Namibia		195;192	170;167	261	171	204		162	197	134;131;125		160	184	110	155	168		136;139	200;149;158;146	171	100	118;121	215;205		103;107	253
2530	Andara DH	Andara	Kavango	Namibia		192	167	242	174	198		162	212	131		157	187	120	164	155		149	155	190	100	125	218		107;97	274
2545	Divundu C	Andara	Kavango	Namibia	176;173	198;195		230;261;227;242		201;198	156;159	162;165	206;197	131;125;122	179;182	157;160	187;184	110;113;120;104;101		152;165;155;189	194;200;203;212	149;143		174;168;181;177;150	113;91	121;128;131	215		103;100	271;274;280;262;250;253;265
2551	Divundu C	Andara	Kavango	Namibia	173	198;195		242;273		198	162;156;159	168;165	212;206	125	179;182	157	184	129;104;101		152;165;168;155	197;200;203	152;136;139		174;165;171	106;113;119;116	121;128;115;137	209;205;218		94;103;100;97	268;271;274;280;262;250;247;253;265;259
2557	Divundu C	Andara	Kavango	Namibia	173	187;198;195		242		198	162	162;165	212;206;215	125;122	179;182	157	187;184	129;120;104		165;168;189	197;200;212	136;139;149		174;165;171;150	119;91	121;128	215;209		103;107	271;253
1362	Divundu C	Andara	Kavango	Namibia	176	198;195;192		227;242	171;174		165	165	206		179;182	157;160	184		155		197	152;139;133;146	173;179;185;182	174;187;181;184;171		140;125	205	170;173;167;152;179;149;176;161;158;155;164	103;100	274;256
1854	Mayara C	Andara	Kavango	Namibia	173	192	176			198	162	165	230	122	179		187	113;104	155	168	197	152		187;181	113;103	134		164	107
2309	Andara DH	Andara	Kavango	Namibia	173		176	242		201	165	168	215	119	182	157	184	110;113	155	152	200	136		177	110	134			107
2339	Andara DH	Andara	Kavango	Namibia	173		167	242		201;198		165		128;125;122	179;182	157	187;184	101	155	171;165;168;155	197;200	152;136;139;149	146	174;190	106;122	121			113;103;107;100	292;268;250
2380	Biro C	Andara	Kavango	Namibia	173	195	167		171	198	165		206	125		157		126	164	165	218	139	179;176;191;170	171	113	118;121;131;125		155	100
2470	Shadikongoro C	Andara	Kavango	Namibia		195;192	167;176	227;242	174	198		162	212	131;128;125		157;160	187;184	120	164	152;168;155		133;149	155	174;190	100;106	125			107	238;274;256
2484	Andara DH	Andara	Kavango	Namibia		189	185	227	171	201		165	215	122			184	129;101	164;155	183			152;146	174	106	128	205	143	103;100	271;247;253;265
42	Andara DH	Andara	Kavango	Namibia		189;195		258	171	201;198		162	206;209	134;122	182	157		110;101		165;168		152;146	179;170	174;168;181;150		128	205;218	146	103;107	235;277;253;259
1739	Andara DH	Andara	Kavango	Namibia		195;192	173;176	227;258	171;174	201;198		165	206;215	131			187;184	107;110;101	164;155	180;155;183				174	106;116	134;140	221;209	98	103;100	244;247;259
1868	Mayara C	Andara	Kavango	Namibia	173	195		227	171			162	212	128;125	179			120	164;152;155	152	206	136	197	174		121	218	173;176;164	100
2365	Mayara C	Andara	Kavango	Namibia	173		170	227		204	159	162		122	179	157	187	94;91	155	152	206	139	146	174	94	121
2465	Kangongo C	Andara	Kavango	Namibia		192	176	273	171	198		165	221	122		157	184	113;116	164			139	191;146	171		131	196		100	268
2515	Andara DH	Andara	Kavango	Namibia		195;192	170;173;167		171	204;198		162;165	212;206;215	125;122		157;160		129;110;113	164;155	165;168		136;139	200;149;146		100;106;119	118;121;128	209;205	143;101	103;107	271;253
2	Divundu C	Andara	Kavango	Namibia		198;192		242		201;198		162;165	212;206	125;122	179;182	157	187;184	110;113;120;101		152;177;165;168;193;155;189		136;139;149;143		165;181;171;150;196	110;106;97;91	118;121;128;137	215;221;212;209;218		113;103;107;100	268;283;271;247;253;265
10	Andara DH	Andara	Kavango	Namibia		192			174	198		165	212	131	179	157		98;101		165		149	200	190	106	121	218	152	107
29	Andara DH	Andara	Kavango	Namibia		189		227	171	198		165	224	122	167	157		107;98;101		165		143	191	171		121	209	155	100
44	Andara DH	Andara	Kavango	Namibia		198;195		227	174	198		165	206;215	140		160		107;110		152		136;139	179	205	100	134;128	212	152	103;100
66	Andara DH	Andara	Kavango	Namibia		192		242		201		165	209	122	179	160;154	187	98		155		158		174;187;177	110;106;113;116	112;125	209		103;100	274
1911	Mayara C	Andara	Kavango	Namibia		198	167;176			201;198	162;165		206	125;122	179		184	107	172;155	152;165	197;200	139		174;140	100;116	125		167;176	103;97
2506	Kangongo C	Andara	Kavango	Namibia		195	167	258		201		165	206	125			187	113	146	155			149	174	113	125	212		103	250
2543	Andara DH	Andara	Kavango	Namibia	173	195		258		198	168;162	162;165	212	122	179			110		152;149	197;200	139		174;181;171;150;196	94;88;91	121;125	205;224			241
2544	Andara DH	Andara	Kavango	Namibia		195		248	174	201		165	212	131;128;125;122		157		98;101		152;168		139;146	185	171		121	205	149	103;100	286
2548	Divundu C	Andara	Kavango	Namibia	173	202;195		242		219	162;165;156		212;206	122	179	157	184	110;101		152;155	200;209	136;143		181	100;106;103		205;218		103;107;100
2553	Divundu C	Andara	Kavango	Namibia	173	198;195		242			162	162	206	125	179	157	184	110;91;101		168;189	206;212			174		128;131;125	221		103;100	262;265
55	Mayara C	Andara	Kavango	Namibia		192		258		201		165	206	134	179	157		120		152		139	173	177			209	167	103;100	283
953	Mayara C	Andara	Kavango	Namibia	176	192		242	171;174	201;198	162	165		134;125	179	160	187;178			168;155	215;206	139;149		184;177	116	125
954	Biro C	Andara	Kavango	Namibia	176	198		258	171	201	156	162	212	128	179	157	187			168	200	143		184	110
1494	Kangongo C	Andara	Kavango	Namibia		208	167;185		171;174	201;198	174		200;206;197;203	134;140;131;128;122	185;160;157;179	160;154;163		82;107;98;110;91;101	164;155		162;159;165	152;136;139;133	173;179;176;185;182;158;203	187;184				161;164		268;274;277;250;253;265;256
1734	Mutjiku C	Andara	Kavango	Namibia			167	196;199;193	171;174	198	174		197;203;194	125;122	179;182	157;154		94;98;91;101	155		162;156	139;149	173;179;176;194	187				167;161;158		238;253
1915	Mayara C	Andara	Kavango	Namibia	173		173	242	171	201					179	157		101		152	197;200		173	187	106	121;125		152	107	271
1924	Mayara C	Andara	Kavango	Namibia		192	161				156		197	125	167		184	120	164	155	209		155;197	165;177	103	118		158	103
2316	Shadikongoro C	Andara	Kavango	Namibia	173		173;161	227;258;211		198	162;159	165		131	179	157	190;187	110		168;155	200	139;149	155	174					103;100
2318	Shadikongoro C	Andara	Kavango	Namibia	173		167	227;242			162	162;165		125;122	179;182	157	187;184	101	164;155		197;200;191	136;149	149;146	174;190;181;171		121;115			103;107;100
2482	Andara DH	Andara	Kavango	Namibia		189	185		174	201		162	206	134;122				110;113	155	168			158;146		110	121	215;205	143;155	103	232;268;271
2516	Kangongo C	Andara	Kavango	Namibia		192	167	242		201		165	215	134			187	101	155	165				181	103	128	215		110	268
2534	Andara DH	Andara	Kavango	Namibia		187	179	242	171	201;198		162;165	215;209	122			184	126;132;129;120	164;155				146	165;171		128;131	209		100	268;271;262;265
2539	Divundu C	Andara	Kavango	Namibia	176;173	202;198;189;195		227;242			162;156;159	171;162;165	206;218;215		182		187	110;104;101;116		152;177;165;168	194;197;200;206	136;146		174;177;171	110;136;106;113	121;140;128;131;137;125	215;212;209;205;218		113;103;107;100;110
2560	Andara DH	Andara	Kavango	Namibia		195		242		201;198		165	212	131;128;125;122	179	160		107;110;104		152		133	182	171	106	125			103;100;97	244;247
737	Mayara C	Andara	Kavango	Namibia	176;173	195;192		242	171	204;201	162;165;156	162;165		128;122	179	157;160	187			152	200	133		174;143		121
952	Biro C	Andara	Kavango	Namibia	176;173	208;198;195;192		242	171;174	198	162	165	218;215	134;125	179;182	157;160				152;165;168;155	215;197;200;206	139;149		174;184;177;171		128;125
963	Mayara C	Andara	Kavango	Namibia	173	195		258		198	162	162		128	179	157	187			152	200	152		171	116	115
1042	Andara DH	Andara	Kavango	Namibia			170;161		179;171	198	176;174		191;197;194	122	182	157		110	155		159	152	179;176;170	187				158		277
1715	Old Bagani C	Andara	Kavango	Namibia	164		176		171	198	176		200;197	131		160		101	155		162;159	139	194	187				170		268;265
1867	Mayara C	Andara	Kavango	Namibia			164		174	201	174		191	122	179	157		129	155		162	139	176	187				173		277
2569	Andara DH	Andara	Kavango	Namibia		195			171	198		162		128;122	179	157	165;162	107;110;120;116		189		136	182	174		125			103;100;97	271;241;253
1	Andara DH	Andara	Kavango	Namibia		195		227		198		165	212	119;122				123;120;104;101		152;177			191	181	113	131	209		103	268;271
13	Andara DH	Andara	Kavango	Namibia		198;195		227		204;201;198		165	212;215	128;122		157		110;101		165;168;189		136;139	191;170	174;177;171		121;128;125			103;100;110	244;238;241;256;259
1391	Kangongo C	Andara	Kavango	Namibia	176	192		258;242							179	157;160;163	184		164;155		206	143;146	200	174;187;177	94	128;115		170;167;161;158;164		268;262;253;265
1892	Mayara C	Andara	Kavango	Namibia	173		176			201	174		194	134	179	157		113	172		209	143	173	184				182
1912	Mayara C	Andara	Kavango	Namibia		189;195					162;156	162	212;206	131;122			184	101	164;172;155	152;168	197;200		194	174;171	110;113	118;115		170
2385	Biro C	Andara	Kavango	Namibia	176;173;164	198	176	258			162;165;159	162				157		101	164	168;155	200	143		184	110				103
2550	Andara DH	Andara	Kavango	Namibia		195;192		258		201;198		162;165	206	131;122		157		110;113;120;104;101		165		143;146	152;176			112		124	113;103;110	253
2572	Andara DH	Andara	Kavango	Namibia		198;189			174	201			206	131;128	179	160		107;110				139	176			131	215	152	103	280
22	Nyangana DH	Nyangana	Kavango	Namibia	176;173	198;189;192	170;173;167;158	227;242;248;233	171;177	201;198	162;156	165	212;206;221;215	116;128;122	179;182	157;160	187;184	110;91;120	172;155	152;165;168;155	197;200;212	149;146	209;179;176;188;200;191;197;170	168;171	110;100;106;113;103;97	134;128	215;221;218	136;185;146;173;149;161;158;155	103;100	268;271;274;277;250;253
534	Mabushe	Nyangana	Kavango	Namibia	176;173	198;195;192	170;167;161	227;242	171	201;198	162;165	162;165	212;218	119;128;122	179;182	157;160	184	88;98;110;91;120;101;116	164;155	152;177;168	224;218;197;200	130;143;146	173;152;194	174;159;190;165;181;150	106;113;103;116	121;128;125	209;205	185;167;182;161;158;155;164	103;100	268;250
541	Mabushe	Nyangana	Kavango	Namibia	173	198	167	258	171	198	159	165	206	128	182	157	184	129	164	177	203	136	164	177	113;103	115;125	205	161	103	253
543	Mabushe	Nyangana	Kavango	Namibia	176;173	198;192	170;167;161;164	227;242	171;174	201;198	168;162;165	155;165	212;206;197	134;119;125;122	179;182	157;160;154	187;184	91;101	155	152;177;165;168;155	218;194;197	130;139;143;146	173;152;194;182	174;168;181;184;177;150	106;103	134;121;128;115;131	209;205	185;173;167;161;158	103;107;100	268;271
557	Mabushe	Nyangana	Kavango	Namibia	176;173	189;195;192	170;167	242	171	198	162;165	165	212	119;122	179;182	160	187;184	110;120;101	164;155	177;165;168	218;197	130;143	173	174	106;103	121;128;115	209	185;161	103;100	268
579	Mabushe	Nyangana	Kavango	Namibia	173	198;192	176;161	227	171	201;198	168;162	162;165	206;218	128	179	160	184	88	155	152	224;194;200	139;146	173	165	113;103;116	131;125	205	158;155	100	271
581	Mabushe	Nyangana	Kavango	Namibia	176;173	187;198;189;195;192	170;173;161	227;242	171;174	198	168;162;165	165	212;206	131;128;122	179	157;160	187;184	88;107;98;110;91;101	164;155	152;165;168;155	194;197;200;206	136;139;143;146	206;173;152;179;200;194;185	174;143;168;165;177;171	100;113;103;91	121;128;115;131;125	209;205;218	170;167;161;158;155;164	103;107	268;271
588	Mabushe	Nyangana	Kavango	Namibia	176;173	187;198	170	242	171	201	165	165	212;206	122	179	160	187;184	101	155	165;168	197	143;146	173;152;194	177	100	121;128	209	158;155	103	268
590	Mabushe	Nyangana	Kavango	Namibia	176;173	198;192	173;167;161;164	227;242	174	201;198	168;162;165	155;165	206;197	134;143;125	179	157;160;154	187;184	110;91;120;101	164;155	152;165;168;155	194;197;203	139;146	173;179;191;194;197;182;203	168;184;177	106;113;103;116	134;128;115;131	209;205	173;182;158	103;107	256
603	Mabushe	Nyangana	Kavango	Namibia	173	202;187;198;189;195;192	170;173;167;161;164	230;227;242	171	201;198	162;165	165	212;206;215	131;128;122	179;182	157;160;154	187;184	88;110;120;101	164;155	165;168;155	215;200;203;206	130;136;139;143;146	209;173;152;179;188;191;185;170	190;143;168;177;171	100;106;113;103;97;91	121;128;115;112;131;125	215;212;209;205;218	170;167;161;158;155;164	103;107;100	271;241;247;253;265;259
604	Mabushe	Nyangana	Kavango	Namibia	173	192	176;161	227	171;174	201;198	168;162	162;165	206;218	128	179	157	184	88;98;91;101	155	152;155	194	139;146	173;179;200;194	168;165	113;103	131;125	205	167;161;158;164	107;100	268
605	Mabushe	Nyangana	Kavango	Namibia	173	195;192	161;185	258;242	171;174	201;198	168;162;165	165	212;206;218	134;128;122	185	157;160	184	101	164;155	152;165	194;197;200	139	173;179	168;177;171	94	121;115;131	205	191;140;167;158	103;107	271
611	Mabushe	Nyangana	Kavango	Namibia	173	202;187;189;195;192	167;161;164	227;258;242;273	171;174	201;198	168;162;165;159	168;162;165	212;206	128;122	179;182	157;160	187;184	88;110;120;101	164;172;155	152;177;168;155	215;194;197;200	136;139;149;146	173;179;200;191;170	190;168;171	100;106;103;91	121;115;131;125	212;209;205;224	167;161;158;164	103;107;100	241;247;265;259
613	Mabushe	Nyangana	Kavango	Namibia	173	198	185	242	174	201	165	152	215	125	182	157	184	88;129;110;101	155	168	212	152	206	174	113	131	218	134;179	103	283
738	Ndonga Linenea	Nyangana	Kavango	Namibia	173	195	170;167	242	171	201;198	162;156	165	206;215	125	179;182	157;160	187	129;110;120;101	164;155	155;174	203;206	133	173	174	110;113	121;128	209;205;218	167;149;164	103;100	268;253
1116	Nyangana DH	Nyangana	Kavango	Namibia	176;173	195	173	242	174	201	159	165	212;206;197;203	140	173;182	157	187	113	172;155	168	197	136;143	173;170;146	171	113	121;125	212	155	103;100	265
1120	Katere C	Nyangana	Kavango	Namibia	173;164	189	161	258;242	174	201;198	162	162	212;221	131	182;167	175;178	187	113	143;134;140	168	200;191;206	155	179;200;191;197	174;177	100;103	115;131;137	215;218	152;149;161;158;155;164	103;100	283
1121	Katere C	Nyangana	Kavango	Namibia	173	187;198	161	258;242	171;174	201;198	162;165	162	212;206	122	182	157	187	110;101	155	165;168	197;200	133;143	179;185;170	184;171	103	128;131;137;125	205	152;176;161;158	107;100	232;235
1126	Katere C	Nyangana	Kavango	Namibia	173	187	170	227	171	201	162;165	165	206	122	179	160	187	120	155	168	194;197	143	200;197;203	187;177	94;88;91	128	209	200;185;143;197;194;161;158	100	280
1127	Katere C	Nyangana	Kavango	Namibia	173	187	170;173	227	171	201	162;165	165	206	122	179	160	187;184	120	155	168;155	197	143	200;197;203	147;165;181;177;171	110;91	128;112	209	188;197	103;100;97	280
1128	Katere C	Nyangana	Kavango	Namibia	176;173	198;195	155	258;242	171	201	162	165	206;215	134;122	179	160	184	110;120;116	140;137	165	200	155	200;197	181	100	121	209	170	103;100	268;265
1130	Katere C	Nyangana	Kavango	Namibia	176;173	195;192	161	227	171;174	201;198	162	165	212;206	134;128	182	190;184;172	187;184	110;91;120	134;137	155	197;203	155	173;170;167	174;190	106;97	134;121	212;209	200;185;203;167;182;164	113;103;100	283;277
1131	Nyangana DH	Nyangana	Kavango	Namibia	173	198	173	242	171	198	162	165	215	122	179	157	187	120	181	171;168	194	136	179	174	110	131	209	109;182	97	241
1134	Karukuta C	Nyangana	Kavango	Namibia	173	195	176	258	174	219	162	165	209	128	179	157	187	82;129	155	177	218	136	173	184	100	131	218	152	103	274
1135	Karukuta C	Nyangana	Kavango	Namibia	173	198	185	227	174	198	162	168	197	122	182	160	184	101	164	155	200	152	191	177	103	118	209	188	103	256
1138	Nyangana DH	Nyangana	Kavango	Namibia	176;173	198;192	170;173	242	171;174	201	168;165	162	212;206	119;125	160;179	157;160	187;184	98;101	164;155	165;168	194;197	139;143;146	209;173;152;188;170	177	110;100	118;121	209	197;158	103;100	268;271
1145	Nyangana DH	Nyangana	Kavango	Namibia	173	195	173	273	171	201	162	165	197	128	179	160	178	101	164	168	218	143	176	174	100	125	221	179;158	103	277
1146	Nyangana DH	Nyangana	Kavango	Namibia	173	198	176	227	171	198	162	162	218	128	179	157	184	88	155	152	224	139	173	165	113	125	205	109;158;155	100	271
1147	Nyangana DH	Nyangana	Kavango	Namibia	173	198	185	227	174	198	162	168	197	122	182	160	184	101	164	155	200	152	191	177	103	118	209	188	103	256
1149	Katere C	Nyangana	Kavango	Namibia	176;173	187;192	170;179	227;242	171	204;201	162;165	165	206	122	179	160	187	110;120	155	171;168	197;203	136;143	200;191;194;203	184;177	113;91	128;131	212;209	197;179;176	100	280;262
1151	Katere C	Nyangana	Kavango	Namibia	176	195	176	258	171;177	198	162	162	221	125	179	157	187	120	155	168	194	136	173;176	190;187	110;106	121	218	161;158;155	113;110;116	271
1152	Katere C	Nyangana	Kavango	Namibia	173	198;192	173	242	171	201	162	165	212;206	122	182;167	157;160	184	101	155	152	200	152;136	179	193	113	128	209	161	103	271
1155	Nyangana DH	Nyangana	Kavango	Namibia	173	208	170	245	171	198	162;159	162	221	122	182	160	184	110	155	155	162;197;200;203	139	179;182	190;184	125	121	221	152;149	110	241
1157	Karukuta C	Nyangana	Kavango	Namibia	173	195	176	242	171	198	162	162	206	125	179	160	184	139;101	164	177	203	136	179	177	88;103	125	212	176	103	274
1158	Karukuta C	Nyangana	Kavango	Namibia	173	198	158	242	171	201	156	162	209	125	179	169	184	120	134;137	168	206	155	173	177	103	115	215	158	103	253
1160	Karukuta C	Nyangana	Kavango	Namibia	173	189;192	164	227;258	171;174	201;198	156	168;165	206;197;203	128;122	167	157;160	184	98;101	155	165;155	197;200	139	206;176;191;185;182	143	110	118;115;125	209;205	164	103;100	271;256
1161	Nyangana DH	Nyangana	Kavango	Namibia	173	198;189	170;167	227;242	171	198	165;159	165	209	131	179;167	157	187;184	82;129;110;120	164;155	171;168	200;203	139;143	173;152;179;200;191;170	174;187;181	110;106;113;116	143;125	221;218	170;173;152;179;182;161;164	94;103	274
1162	Nyangana DH	Nyangana	Kavango	Namibia	173	198;189	170;167	242	171	201;198	162;165	165	209	131	179;167	157	187;184	129	164;155	171;158;168;155	203	139;143	173;152;179;212;188;200;191	181	113	143;125	215;221;218	170;173;152;179;182;161;164	94;103	268;274;250
1163	Katere C	Nyangana	Kavango	Namibia	179;173	198;192	167;164	242	171	204;201;198	162;156	162;165	224;212;221;215	119;125;122	179;167	157;160;163	187	110;91;101	164;155	152;165	197;200	152;139	179;200	193;143;168;187;177	110;106;103	134;121;115	209	170;167;152;161;158;155	103;107;110	268;271
1165	Katere C	Nyangana	Kavango	Namibia	173	189;192	161;158;155	242	171	198	156	165	206	122	130	169	187	129	143;140;149;137;146;152	202	197	155	185;182	140	113	134	205	158;155	107	244;247
1166	Katere C	Nyangana	Kavango	Namibia	173	198	185	242	171	201	165;156	165	215	134;122	179;182	157;160	184	101	164;155	152;165	194;200	136	185;182	181;140	94;122;97	121	215;221;218	161;164	103	268
1167	Katere C	Nyangana	Kavango	Namibia	173	195;192	173	242	171	198	165	165	221	116	182	160	187	129	164	214;217	206	136	191	165	91	125	218	170	103	271
1171	Nyangana DH	Nyangana	Kavango	Namibia	173	198;195;192	173	227	171	201	165	165	206	128	179	160	187	139	155	168	212	146	182	177	106	121	221	161	103;100	268
1174	Katere C	Nyangana	Kavango	Namibia	179	192	161;158	258;242	171;177	201	162	165	206	125;122	179;167	178;190;184	184	110	143;140;137	171;165	194;203	155	176;188;194;182	184;171	113;97	112	212;209	176	103;100	262;250;253
1177	Nyangana DH	Nyangana	Kavango	Namibia	176;173	187;189	158	242	171;174	198	153;150;162	162;165	212;206;221	140;131;125	173;179;182	184;172	187	110;120	143;137;146	165;168	200;203;206	155	206;173;194;185	143;177	110;103	121;115	212	170;152;161	103;107	232;271;250;256;259
1179	Karukuta C	Nyangana	Kavango	Namibia	173	208;192	170;173	227;258	171	198	162	162	212;206	122	179	157	187;184	120	164;155	168	194	152;139	173;194;203	190	125;103	134;121	209;205	188;170;152	94;103	268;271
1181	Karukuta C	Nyangana	Kavango	Namibia	173	198	176	227	171	198	162	162	218	128;122	179	160	184	88	155	152	224;200	139	173;170	165	113	118;125	205	161;158;155	103;100	271
1182	Nyangana DH	Nyangana	Kavango	Namibia	173	208;198	170;173	261;242;245	171;174	219;201;198	162;165	168;162;165	212;215;209	125;122	157;182	157	187;184	123;94;82;98;110;113;91;104;101	155	165;168	200;206	152;139	173;179;176;197	174;181;177	110;103	118;128;131	209;205	176	113;103;107;100	274;253;256
1190	Nyangana DH	Nyangana	Kavango	Namibia	176;173	187;189;195;192	173	242;236	171	201	168;165	165	206	119;122	179;182	160;154	187;184	129;110;120	164;172	152;165	194;203	130;136	179;182	205;165;177	94;110;91	134;125	215;221;224	170;176;158;164	107;100	268;250;253;265
1192	Katere C	Nyangana	Kavango	Namibia	176	195	176	242	174	201	171	162	212	128	179	157	187	120	164	165	203	133	170	184;171	94	118	218	158	103	268
1193	Katere C	Nyangana	Kavango	Namibia	176	192	161	242	171	201	162	165	206	122	179	178	187	110	134;137	171	203	155	194	184	113	131	212	173;176	103	262
1197	Katere C	Nyangana	Kavango	Namibia	164	189	176	242	174	201	162	165	206	119;122	157;182	157	184	120;116	155	168	197	139;143	173;170	174;184;177	119;116	118;121	221	158	103;100	244;250;247
1199	Nyangana DH	Nyangana	Kavango	Namibia	173	198	170	258	171	201	162	165	200	125	167	175	187	120	164	140	215	136	173	171	110	121	218	161	100	274
1203	Shinyungwe C	Nyangana	Kavango	Namibia	173	195	167	242	171	198	162	162	206;197	140;125;122	179	160;154	187	110	155	165	200;203	143	173;176	177	125;103	137;125	212;218	167	103;100	277
1205	Shinyungwe C	Nyangana	Kavango	Namibia	173	198;189;195;192	167;176;161	227;242	171	201;198	162;156	165	212;206;197;218;215	128;125;122	179;182	163	187	88;107;98;110;91;104;101	164;155	152;165;155	224;194;197;200;203;191	152;136;139;143	173;179;176	165;196	110;125;106;119;103	118;134;128;125	212;209;205;218	170;173;167;161;158;155;164	94;103;107;100;97	232;235;268;238;271;274;277;250
1211	Shinyungwe C	Nyangana	Kavango	Namibia	176;173	202;198;192	173;167;179;164	227;258;242	171;174	204;201;198	165;156	162;165	224;206;218	134;140;125;122	173;179;182	157;154	187	123;110;113;104;101	164;155	165;168;155	197;200;203;191	130;136;139	164;176;197	174;165;181	110;100	134;128	215;221;212;218	170;167;152;182;164	103;100	271
1216	Shinyungwe C	Nyangana	Kavango	Namibia	179;173	192	161	242	171;174	198	162	162;165	206	140;131;128	179	166	187;184	110;113;104;101	143;140;146	152;155	197;206	155	179;185;182	174;165;184	100;119	140;128	221;212;209	185;173;176;161;164	103;100	274;280;262
1232	Shinyungwe C	Nyangana	Kavango	Namibia	176	198	158	258	171	201	156	165	212	137	179	172	187;184	101	143;146	165	197	155	176	181	100	115	221	158	110	268
1233	Shinyungwe C	Nyangana	Kavango	Namibia	173	192	173	242	171	201	162	162	221	128	179;182	157;154	187	110;120	155	177	191	146	152;191;170	165	110	121	218	170;152;161;158;155	113	268
1234	Shinyungwe C	Nyangana	Kavango	Namibia	173	198	173	248	171	201	162	165	215	122	182	160	184	113	155	177	191	143	182	165	110	125	218	188	103	247
1235	Shinyungwe C	Nyangana	Kavango	Namibia	173	195	167	242	171	219;198	162	162	197	140	179	160;154	187	110	155	152;165	200	149;143	176	174;165;177	110;125;91	128;137;125	212;218	167;164	107;100	277
1238	Shinyungwe C	Nyangana	Kavango	Namibia	176;173	202;198;189;195;192;204	173	258	171	201	171;162	168	221	125	179	160	187;184	129;110;120	155	177;155	203;209	146	173;176;197	181	116	121;112	205	161	103	250;247
1239	Shinyungwe C	Nyangana	Kavango	Namibia	173	189;195;192	161;158	242	171	201;198	162;165;156	162	206;215	131;122	127	160;172	187;184	126;110;120;101;116	158	152;177;155	197;200	155	176;191;197;170	190;171	94;110;100	118;134;121;128	218	167;161	107	244;250;247
1240	Shinyungwe C	Nyangana	Kavango	Namibia	176	198;189	170;161	242;245	171	201;198	162;165	165	212;218;209	112;125	179	157	187;184	110;113;101	164;181;155	152;168	197;200;206	139	173	190;177	110;106;103	121;131	215;212;205;218	173;167;164	103;107	283
1248	Shinyungwe C	Nyangana	Kavango	Namibia	173	195	167;176	242	171	204;201;198	165;159	162;165	212;206;221	149;131;125	185;179	157;160	187;184	110;120	164;172;155	152;168;155	200;203	136;139;146	179;176;200;197	184;150	110;100;116	128;115;131	215;218	170;167;182;161;164	103;107	268;271;274;253;265;256
1250	Shinyungwe C	Nyangana	Kavango	Namibia	173	202;189	173	258	171	201	162	168	221	125	179	160	187	120	155	177	209	146	176	181	116	121	205	161	103	250
1253	Shinyungwe C	Nyangana	Kavango	Namibia	173	198;195	161;158	258;248	171	201	162;156	165	224;212;206;221;215	125;122	179;182;167	157;163;172	187	110;113;120	143;140;137;146	152;177;189	197;191;209	155	176;170;182	168;165;181	110;113;103;116	118;125	199;205;218	188;161;158	103;107;100	250;247;265
1254	Shinyungwe C	Nyangana	Kavango	Namibia	173	198;195	173	273	171	201;198	162;156	165	209	131;122	179;182	160;154	184	101	172;155	177;168	215;197;191	136;143;155	170	165;171	110;100	118;125	199;205;218	161	103;107;100	286;268
1255	Shinyungwe C	Nyangana	Kavango	Namibia	173	195	158	227	171	201	156;159	165	206	134;128	167	157	187;184	110	155	152	197;191	136	170	168	110;113;103	118;115	199;205	161	103;107	265
1256	Shinyungwe C	Nyangana	Kavango	Namibia	173;164	198;189	170;176;179	258;242	171;174	201;198	162	162;165	212;221	131;128	182;167	160	187	110;113;104;101	164;155	165;168	187;162;200;203;191	133;143	173;200;191;194;197;170;218	174;187;177;171	110;100;106;103;97	115;137	215;218	146;152;149;161;158;155;164	103	283;277;247;265
1257	Shinyungwe C	Nyangana	Kavango	Namibia	173	195	167;164	258	171	201	156	165	206;215	131;128	179;182	157	184	129;110	172;155	189	197	139;149	170	202	103	134;125	205	176;182;158;164	103	268;283;280;262
1259	Shinyungwe C	Nyangana	Kavango	Namibia	173	195	170;164	261;242;245	174	204;201;198	168;165	165	200;197;209	134;137	179	157	184	123;113;120	164;155	168	203	136;149	179;200;182;203	165;181;177	110;106;122	118;125	221;205	182;161	107;97	268;277;250
1260	Shinyungwe C	Nyangana	Kavango	Namibia	173	192	170	242	171	201	165	162	206	122	179	160	187	107;113;116	164	165	197	143	179	168;165	122	121	205	170;167;155;164	103	265
1261	Shinyungwe C	Nyangana	Kavango	Namibia	176	189	179	242	174	201	162	165	206	128	179	160	184	120	155	168	206	139	188;185	177	106	131	209	155	113	253
1262	Shinyungwe C	Nyangana	Kavango	Namibia	176	189	170	245	171	201	162;165	162;165	218;209	112;125	179	157	184	113	164;155	152;168	197;200	139	173;170	168;181;177	110;106	121;131	215;212;205;202	173;167	103;97	283
1263	Shinyungwe C	Nyangana	Kavango	Namibia	173	198;195	161	242	171	198	156	162	206	125	179	157;160	187	104	164	168;162	200;203	139	173	184	110	118;125	205	161;164	103;107	268
1282	Shinyungwe C	Nyangana	Kavango	Namibia	173	198	164	273	174	201	162	165	206	131	173	160	184	82;139;91	155	152	197	139	188	184;171	110	112	205	161	107	271
1283	Shinyungwe C	Nyangana	Kavango	Namibia	173	189	170	227	171	204	162;165	162	206	131;128	179	157	187	107;110;120	164;155	168	197	152	173;152;179;200	184	110;100	140;125	209	173	100	235;238
1284	Shinyungwe C	Nyangana	Kavango	Namibia	176;173	198;192	167;179;164	242	174	201	162	165	206	131;119;122	173;179;176	157;160	187;184	139;113;101	164;172;155	152;168;189	197;200;203	152;136;133	164;188;200;194;185;182;161	171	94;110;106;113	112	212;209;205;218	170;173;179;176;161;164	107	271;247
1382	Ndonga Linenea	Nyangana	Kavango	Namibia	173	198;189;192	161;179;164	258;242	171	198	180;162;165	162;165	206	134;140;137;131	185;179;182	160	187;184	139;110;91	164;155	152;165	197;200	139;149	164;176;170;182	174;181;177	100;106;113	121	215;221	146;170;173;167;179;176;182;158;155;164	103;100	268;283;277
1383	Ndonga Linenea	Nyangana	Kavango	Namibia	173	198	170	242	171	201	156	162	209	125	179	157	184	88;120	155	168	206	136	173;170	165;177	103	115	215	158	103	253
1397	Ndonga Linenea	Nyangana	Kavango	Namibia	173	198;192	173;167;161	242	177;174	201;198	162;165	162;165	212	116;119;122	179;182	157;160;154	187;184	110;101	155	152;165;168;155	197;200;212	136;139;146	173;152;164;191;170	187;177	125;122;116	128;131	215;221;218	170;152;179;176;161	103;100;110	268;271;241;253;259
1398	Ndonga Linenea	Nyangana	Kavango	Namibia	173	198;192	161;158	242	171;174	201;198	165;156	165	212;221	128;122	179;182	166;178	190;184	110	140;137	165;155	197;206	155	170	165	106;122	121;115;131	215;218	152;161	100	292;283;241;250
1400	Ndonga Linenea	Nyangana	Kavango	Namibia	173	198;189;192	173;161;164	258;242	171	201;198	180;162;165;156	162	206	134;140;137;131;128;125	179;182	157;160	187;184	110;91	164;181;155	152;180;165	197;200;212	139;149;146	173;164;176;188	174;181;184;177	100;113;103	121;115	215;221	170;167;155;164	100;110	244;271;277;262;247;253
1403	Ndonga Linenea	Nyangana	Kavango	Namibia	173	192	167;179	258;242	174	198	162	165	230	125	179	157;160	187	107;110;113;91;101	164	152;165	218;200	136;139;146;158	179;176	177	94;100;106;103;97	134;121;115	209	161;158;164	103;107;100;110	235;238
1404	Ndonga Linenea	Nyangana	Kavango	Namibia	173	195	164	227	171	198	162	165	206	128	179	157	187	101	155	168	162;197	139	173;188;191	171	110	121	209	170;173;176	103	268
1406	Ndonga Linenea	Nyangana	Kavango	Namibia	173	202	173	227	171	201	165	165	206	128	179	160	187	139;101	155	168	212	146	182	177	106	121	221	161	103	268
1407	Ndonga Linenea	Nyangana	Kavango	Namibia	173	195	170	242	171	198	156	165	215	125	182	160	187	126;129	164	174	206	133	173	174	113	128	218	164	103	268
1408	Ndonga Linenea	Nyangana	Kavango	Namibia	173	198	161	242	174	201	162;159	165	212	131	182	157	184	110	155	168	162;203;206	139	191	177	106;103	131	205	161;158;155	103	283
1420	Ndonga Linenea	Nyangana	Kavango	Namibia	173	195	170;173	242	171	198	162;165;156	162;165	221	116	179;182	160	187;184	129;120	164;155	152;180;168;174;217	197;200;165;203;206;209	136;139;133	173;191;194;170	165	103;91	121;115;125	215;218	170;173;167;161;164	103	268;271;253
1422	Ndonga Linenea	Nyangana	Kavango	Namibia	173	195	161	273	171	198	162	165	215	122	167	160	187	110	164	152	200	136	173	171	91	125	205	112;170;179;182	100	271
1423	Ndonga Linenea	Nyangana	Kavango	Namibia	176	195	167	242	174	219	162	165	212	128	182	157	184	110	164	177	218	143	176	184	103	131	218	155	103	256
1424	Ndonga Linenea	Nyangana	Kavango	Namibia	173	192	164	258	171	198	162	165	206	128	167	160	184	101	155	165	200	139	185;182	143	110	125	205	161	103	271
1427	Ndonga Linenea	Nyangana	Kavango	Namibia	173	195	170	242	171	198	156	165	215	125	182	160	187	129	164	174	156;206	133	173;170	174	113;103	128	218	164	103;100	268
1430	Ndonga Linenea	Nyangana	Kavango	Namibia	173	192	173	242	171	201	162	162	212	137	179	157	187	110	181	180	212	146	176	184	103	115	221	164	110	247
1431	Ndonga Linenea	Nyangana	Kavango	Namibia	176	202	158	273	171	198	162	165	206	125	182	157	187	110	140;137	152	200	155	170	171	100	128;131	212	170	103	268
1441	Ndonga Linenea	Nyangana	Kavango	Namibia	176	202	176	242	171	201	162	162	206	134	182	160	187	98	164	165	197	136	179;182	187;199	110	128	221	164	103	274
1444	Ndonga Linenea	Nyangana	Kavango	Namibia	173	198	158	258	171	198	165	165	218	122	167	169	187	113	140;152	165	197	155	191	187	106	125	205	164	103	271
1445	Ndonga Linenea	Nyangana	Kavango	Namibia	173	198;192	158;155	242;245	171	219;198	162	165	206;197	140;122	130	160;163	184	129;110	140;137	165;202	197	155	173;191	184;177	100	131;125	212;209;224	185;167;179;161	103	271;274;265
1446	Ndonga Linenea	Nyangana	Kavango	Namibia	173	195	167	227	171	198	162	165	212	119;122	179	157	184	120	155	177	215;209;212	133	188;191	181;184	100;103	131	209	143;146;140	103;100	253
1449	Ndonga Linenea	Nyangana	Kavango	Namibia	173	208;198	170;185	258	171;174	201	162;165	162;165	212;221;218;209	119;128	179;182	157	190;184	101	164;155	152;177	200;209	139;133	176	147;184;177;140;153	100;103	131;137	212;218	146;149;158;155	103	247
1450	Ndonga Linenea	Nyangana	Kavango	Namibia	173	208;198;195;192	161	227	171;174	201;198	153;162;165	165	206;197;203;215;209	131;119;128;125	179;182	157;160	190;187;184	110;101	164;155	152;177	197;200;203	139;133;146;158	179;176;182	147;140	110;100	118;140;115;131;137	209	146;158;155	103	244;268;247;253
1451	Ndonga Linenea	Nyangana	Kavango	Namibia	173	195	161;158	242	171	201;198	162	165	206	125	133;130	160;172	187	132;129	143;140;149;146;152;155	158;152;189	206	155	197	165;199	100;106	118	205	164	103;100	280
1452	Ndonga Linenea	Nyangana	Kavango	Namibia	173	189	167	258	171	201	162;159	165	206	143	179	157;160	187;184	101	164;155	152	197	136;143	179;170	184	106;122	134;121	209	164	103	271
1454	Ndonga Linenea	Nyangana	Kavango	Namibia	173	195	170	242	171	198	156	165	215	125	182	160	187	126;129	164	174	156;203;206;209	133	173	174;187	110;113;116	128	218	167;161;164	100	268
1464	Ndonga Linenea	Nyangana	Kavango	Namibia	173	192	173	242	171;177	201	162	162	212	137	179	157	187	110	181	180	215;209;212	146	173;176	187;181;184	100;106;103	115	221	167;161;164	107;110	247
1466	Ndonga Linenea	Nyangana	Kavango	Namibia	173	198	170	258	171	198	165	165	218	122	167	157	187	113	155	165	194;197;165	139	191	187	106;103	125	205	161;164	103	271
1467	Ndonga Linenea	Nyangana	Kavango	Namibia	176;173	208	170;167	242	171	201;198	165;156	165	206;209	122	157;179	157	187	101	155	152	200;203	139	197	202;156	110;106;113	137	205	176	107	268;265
1468	Ndonga Linenea	Nyangana	Kavango	Namibia	173	192	161	288	174	201	168;162	162;165	206	128	179	157	184	101	155	155	194;191	146	173;200	168;184	100;106;103	131	224	170;167;164	107	268
1469	Ndonga Linenea	Nyangana	Kavango	Namibia	173	198;195;192	170;173;161;185	227;242	174	201;198	162;165;156	162;165	212;206	137;131;128;122	179;167	157	187;193	110;101	164;155	158;152;165	197;200;203;206	152;136	173;176;191	168;181;177;171	94;100;106;91	128;115	215;205;218;224	126;161;158;164	103;107;100	235;268;238;271
1563	Nyangana DH	Nyangana	Kavango	Namibia	173	202	173;161	258	165;171	201	156	162	212	122	179;182	160	187	110	164;181	177	200	136;146	200;197	174	136;88	115;125	215;205	161;164	113;100	271;253
1566	Nyangana DH	Nyangana	Kavango	Namibia	173	202;195	173	258	165	201	156	162	212	122	182	160	187	107;110	164	177	200	143;146	197	174	136	125	215	164	113;110	271
1569	Karukuta C	Nyangana	Kavango	Namibia	179	195;192	170;161	242	171	201;198	153;162	155;165	206	128	182	160	187;184	110	155	155	215;203	139;158	173;176;194;197	174;190;165;199	100;103	134	218	191;140;158	103;107	271
1573	Karukuta C	Nyangana	Kavango	Namibia	173	195	173	258;242	165;171	201	162;156	168;162	212	128;122	179;182;167	160	187;184	110;120	164;155	177	200;209	139;146	173;200;197	174;187;184	136;116	128;125	215;221	170;173;161;164	113;103	268;271;262;265
1574	Karukuta C	Nyangana	Kavango	Namibia	173	192	173	258;242	165	201;198	156	162;165	212	122	179;182	157;160	187;184	110;113	164;155	177;155	197;200	136;146	176;191;197;170	174;187	136;113;119	125	215	167;161;155;164	113;107;110;116	271;253
1575	Karukuta C	Nyangana	Kavango	Namibia	173	195	167	242	174	201	162	165	209	116	182	160	184	110	155	165	200	146	179;182	193	113	125	218	170	103	280
1577	Nyangana DH	Nyangana	Kavango	Namibia	176	195	167	242	174	219	162	165	212	128	182	157	184	110	164	177	162;218	143	176	184	100;103	128;131	218	155	113;103;100	256
1579	Nyangana DH	Nyangana	Kavango	Namibia	164	189	176	242	174	201	162;156;159	165	206	122	182	157	184	120;116	155	168	162;194;197	143	173;170	177	119;116	121	221	109;158;155	103	247
1581	Nyangana DH	Nyangana	Kavango	Namibia	176;173	195;192	167;179	227	174	198	162	162	212;206	125;122	157;167	157;160;154	187	88;110;91;104	155	152;155	197;200	143;158	173;176;170	181;177	110;125	121;131	227;218	167;161	103;100	283;280;277;262
1582	Nyangana DH	Nyangana	Kavango	Namibia	176	195	167	242	174	219	162	165	212	128	182	157	184	110	164	177	215;162;221;218	139;143	173;176	184	100;106;103	131	218	109;152;155	103	256
1583	Nyangana DH	Nyangana	Kavango	Namibia	173	192	173	233	171	204	168;165	165	206	125	182	160	187	110	155	155	203;206	130	194	171	110	134	224	185;188;182	107	268
1587	Nyangana DH	Nyangana	Kavango	Namibia	173	195	176	242	191;171	201	156	162	221	128	179	157	184	101	164	168	156;200;203	146	173;188;191;194	168	94;97	131	212	143;146;140	103	250
1588	Karukuta C	Nyangana	Kavango	Namibia	173	192	167	258	171	198	162	162	221	125	179	157	187	110;120;101;116	155	168	194	158	176	190	110	121	215	130;134;158;155	113;110	271
1592	Karukuta C	Nyangana	Kavango	Namibia	173	208	170;173	258	165;171	201;198	162;156	162	212	122	179;182	160	187	110;120	164;172	177;165;168	194;200	139;146	200;197	174	136;106	125	215	170;161;164	113;110	271
1595	Karukuta C	Nyangana	Kavango	Namibia	176;173	198;192	170;173	242	171;174	201;198	168;165	162;165	212;206	119;125;122	160;179	160	187;184	82;98;91;101	164;155	165;168	194;197	143;146	209;173;152;188;170	184;177	110;100	118;121	209	197;155	103;107	268;271
1600	Nyangana DH	Nyangana	Kavango	Namibia	173	189;195;192	176;179;164	227	171	198	162;165	165	206;221	128	179;167	157;160	187	98;101	155	165	197;200	139;133	173;152;176	143	110;122	131;125	209;205	161	113;103;100	268;271;277
1601	Nyangana DH	Nyangana	Kavango	Namibia	176	195	176	242	174	198	162	165	218	122	179	160	184	107;104	155	152	197	133	182	171	106	125	215	173;164	110	247
1602	Nyangana DH	Nyangana	Kavango	Namibia	173	192	167	242	174	198	165	165	212	122	182	160	184	110	155	155	197	136	170	187	122	131	221	152	107;110	241
1603	Nyangana DH	Nyangana	Kavango	Namibia	173	195	170	227	171	198	159	162	206	125	167	157	184	91	155	155	159;197	146	170	177	110;106	125	209	167;164	107	271
1605	Nyangana DH	Nyangana	Kavango	Namibia	176;173	195;192	173;176;182	258;242	171	204;201	174;162;159	165	221;215	128;125;122	179;182	157	187;184	110;101	164;155	155;189	197;206	130;136;149	179;176;200;197	174;190;187;177	113;116	128;115;131	215;209	167;161;158;155;164	103;107	262;250;253;259
1607	Nyangana DH	Nyangana	Kavango	Namibia	173	189	179	258	171	198	165	162;165	221;215	122	179	160	187;184	98	164;155	165;155	215;218	139;133	173;176;170	174;187;184;171	125;122;119	131;125	209;205	170;167	113;103;110	274
1608	Nyangana DH	Nyangana	Kavango	Namibia	173	195	158	258	174	219	162	165	209	128	130	175	187	129	134;137	177	218	155	173	184	100	131	218	152	103	274
1610	Karukuta C	Nyangana	Kavango	Namibia	173	198	179	242	171	198	162	165	206	122	179	157	184	113	164	155	203	139	203	184;171	106	125	215;212	167;164	103;100	268
1611	Karukuta C	Nyangana	Kavango	Namibia	173	192	179	242	174	198	165	165	212	122	182	160	187	110	155	155	197	149	170;167	187	122	131	221	152;149	103	238;241
1613	Karukuta C	Nyangana	Kavango	Namibia	173	189	167	242	171	201	165	165	221	134;137;131;128;125	157;179	154	187	88;107;98;113;116	155	155	197;200	143;146	179;176;182	190	110;113	118;121	212;218	143	103;107;110	268;265
1614	Karukuta C	Nyangana	Kavango	Namibia	173	189;192	173;164	258	171	198	168;165	162	206	125	179	157	184	91;101	164;155	165;162	168;200	139;143	188	184;177	110;106;113	118	209	152;155	103;107	268;271
1615	Karukuta C	Nyangana	Kavango	Namibia	173	195	167	242	174	201	162	165	209	116	182	163	184	110	155	165	200	146	179;185;182	193	113	125	218	170	103;100	280
1617	Karukuta C	Nyangana	Kavango	Namibia	176;173	208;198	161;158	258;242	171;174	201;198	162;159	162;165	212;206;203;215	131;128;122	179;182	160;175	187	110;120;101	140;137	165;168	194;206	155	179;200;191	184;177	110;106	118;121;131;125	215;209;205	170;158;155	103;107	268;283;271
1619	Karukuta C	Nyangana	Kavango	Namibia	173	192	158	242	179;171	201	165	165	212	122	182	166;190;184	184	101	158;152;155	171	203	155	179;182	184;177	106	128	205	161;158	103;100	268;271
1621	Nyangana DH	Nyangana	Kavango	Namibia	176;173	195;192	173;158	227;258	171;174	198	156;159	162	212;206	128;122	179	160	184	129;120	164;155	165;168	197	136;146	173;176	181;184;171	110;116	134;128	215;221;212;218	143;140	103	268;271;250;253;256
1623	Nyangana DH	Nyangana	Kavango	Namibia	176	192	167	242	171	198	165	165	212	122	182	160	184	101	155	177	197	143	173	181	106	128	209	185	103	283
1627	Nyangana DH	Nyangana	Kavango	Namibia	173	189	173	242	174	219	162	165	218	131	182	157	187	129	164	177	218	139	203	187;184	110;106	125	218	161;158	103	262
1630	Nyangana DH	Nyangana	Kavango	Namibia	173	192	161	242	174	198	165	165	212	122	182	166	184	110	134;137	155	197	155	170	187	100;122	131	221	152	107;110	241
1632	Karukuta C	Nyangana	Kavango	Namibia	173	202	182	258	174	201	168	165	206	125	182	157	187	110	164	168	200	143	191	205;193	113	134	218	158	103	271
1638	Karukuta C	Nyangana	Kavango	Namibia	173	198	173	248	171	198	162	162	215	128	179	157	187	120	155	152	197	136	197	181	110	121	215	164	103	271
1639	Karukuta C	Nyangana	Kavango	Namibia	176;173	195;192	167;161	242	171;174	223;201;198	168;165	165	206	125;122	179	157;160	187;184	129;110;120	155	152;217	200;212	136;139	173;176;194;197	184;171	97	121;128	215;221;218	170;173;176	103;100	268;262;247;265
1645	Nyangana DH	Nyangana	Kavango	Namibia	176	202;192	164	242	171	198	162;159	165	206	131;125	167	157	187	110;113;104;101	155	168;140	197;209	152;143	179;191;194;182	177;196	94;113	131;125	205	170;167;149;176;161	103;100	286;283;271;280
1750	Katere C	Nyangana	Kavango	Namibia	176;173	187;192	173;179	258;242;211;214	171;174	201;198	176;165;156	162;165	212;206;218;215	112;128	179;182	157;160	174;184	88;110;91;101	155	180;177;165;168	203;206;212	136;139	173;152;179;200;191;170	165;187;177;171	106;116;91	143;115;131;125	215;205;218	173;167;176	103;107;100;97	250;253
1758	Mabushe	Nyangana	Kavango	Namibia	173	195;192	173	236	171;174	201;198	162;165	162;165	218;215	128	179	157	184	88;104;101	164;155	152;162	194;206	130;136	173;212;191;194	168	110;113	134;125	205	173	100	238;259
1771	Katere C	Nyangana	Kavango	Namibia	176	198	167;176	227;242	171	201	162	162	209	119	179;182	157	187	101	155	168	200	139	185;182	184;162	100	140;131	205	161	107	271
1839	Katere C	Nyangana	Kavango	Namibia	173	198	161	227	174	201	159	165	206	134	182	160	187	110	164	168	215	139	173;170	171	100	131	218	164	103	280
2028	Mabushe	Nyangana	Kavango	Namibia	173	198;192	167;161	227	174	201	162;165	155;165	206	143;125	179	157	187;184	110;120;101;116	155	155	194	152;136;146	179;176;212;200;191	168	103	134;128	209	167	103;107	271
2034	Mabushe	Nyangana	Kavango	Namibia	173	195	173	258	171	198	162	155	224	137	179	157	187	110	164	165	209	139	176	177	116	131	205	161	103	271
2035	Mabushe	Nyangana	Kavango	Namibia	173	195	167	258	174	226	162	165	206	122	179	157	187	110;113	164	155	206	139	200	184	91	128	224	155	103	274
2036	Mbambi East	Nyangana	Kavango	Namibia	173	189;192	167	242;248	171	201	165	165	212;206	116	182	157	187	110;113;120	164	152;165	197;200	139	206;209;188;185	171	106;119	121;128	218	170;158	103;107	283
2039	Mbambi East	Nyangana	Kavango	Namibia	173	192	173;167	258;242	171	204;201;198	162;156	162;165	206;197	137;125;122	179;182	157	187;184	129;110;120;101	155	152;155	203;191	152;146	173;152;179;200;182;203	181;184	110;85;100;103	121;131	215;205	182;164	103;110	268;253
2043	Mbambi East	Nyangana	Kavango	Namibia	173	192	167	242	171	201	162	162	221	122	182	157	187	120	155	168	194	158	173	165	110	118;121	205	176	103	271
2044	Mabushe	Nyangana	Kavango	Namibia	182	189	167	242	171	201	165	162	215	128	182	157	187	110;101	146	165	212	143	182	174	103	134;131	215	161	103;100	277
2050	Mabushe	Nyangana	Kavango	Namibia	173	195	170;167	258	171	201	162	165	206;218	122	182	157	187	110;113;120	164	165	203;206	139;146	179;212;200;191	168;184	106;91	128;125	212;209;224	161;155	107	268;274
2053	Mabushe	Nyangana	Kavango	Namibia	173	198;195	176	227	171	198	162	162	218	128	179	160	187;184	88	155	152	224;221;206	139	173	168;165	113	125	205	158;155	100	271
2057	Mabushe	Nyangana	Kavango	Namibia	173	198	176	227	171	198	162	162	218	128	179	160	184	88	155	152	224;221	139	173	165	113	125	205	158;155	100	271
2058	Mabushe	Nyangana	Kavango	Namibia	173	198	167	227	171	198	162	155	221	128	185	157	184	116	164	155	200	152	197	165	100	131	218	164	103	274
2059	Mabushe	Nyangana	Kavango	Namibia	173	192	161	288	174	201	168	165	206	128	179	157	184	101	155	155	194	146	200	168	103	131	224	167	107	268
2062	Mbambi East	Nyangana	Kavango	Namibia	173	195;192	173;167	258;242	171	201	156	162;165	212;197;194;215	125;122	179	157	184	110;120	155	152	191	152;139	179	184	110;100	121;131	215;205	149;161;158;155;164	103;110	268;253;265
2064	Mbambi East	Nyangana	Kavango	Namibia	173	198;192	170;173	227	171	201;198	162;156	165	212;206;221;215	128;125	179	160	187;184	110;91;101	164;155	152;165;168	197;191	152;149;143	179;176;197	165	100	118;121;131	215	155	103;100	271;277;253;259
2073	Mabushe	Nyangana	Kavango	Namibia	173	198	167	227	171	198	162	162	206;218	125	179	160	187	88;120;116	155	152	191	136;139	173;176	165;181	106	115	205	170	103;100	271
2075	Mabushe	Nyangana	Kavango	Namibia	173	195;192	173	258	171	198	162	155	224	137	179	157	187	110	164	165	209	139;149	176	177	100;116	134;128;131	205	161	103;100	271;256
2078	Mabushe	Nyangana	Kavango	Namibia	173	192	176;185	227	174	198	162;165	162;165	197	131;128;125	179	157	187;184	88;91;120;116	155	152;155	209	139	173;176	168;165	110;113	128;125	205;218	188	103;100	268
2081	Mabushe	Nyangana	Kavango	Namibia	173	192	161	258	174	198	162	165	206	125	179	160	187	107;104	155	152	197	158	200	171	106	121;125	212	176	100	247
2085	Mbambi East	Nyangana	Kavango	Namibia	176;173	189;195	167	242	171	201;198	162	162;165	206	137;128	170	157	190;187	129;101	155	152;155	200;203	139;146	173;152;182	181	94;103	121	215;209	136;149;182	103	268
2086	Mbambi East	Nyangana	Kavango	Namibia	173	195	173	242	171;174	198	162;165	162	206	125	179;167	157;160	187	98;101	164	152;165	197;212	139	173;194	165;177	94;106;113	121;115	209	176	103;110	274
2088	Mbambi East	Nyangana	Kavango	Namibia	173	198	173	258	171	201	162	168	212;206;221;215	125	179	157;160	187;184	120	155	177;165;168	209	139;146	176	181	116	121	205	121;170;161	113;103	250
2089	Mbambi East	Nyangana	Kavango	Namibia	176;173	198;189;195	173;167;176	227	171	201;198	168;162;165;156	162;165	212;206	128;125	170;179;182	157;160	187;184	129;110;101	146;155	152;155	218;194;197;200;203;191;206;209	139;146	173;179;176;191	165	110;106	121	215;221;209;205;218	179;149;176;161;164	103	268;277
2093	Mabushe	Nyangana	Kavango	Namibia	176	198;189	176	242	171	201	162	165	212	122	182	160	187	110	155	168	200	143	170	181;184	106	118;128;131	221	152	100	241
2096	Mabushe	Nyangana	Kavango	Namibia	173	198	176	227	171	198	162	162	218	128	179	160	184	88	155	152	224	139	173	165	113	125	205	158	100	271
2097	Mabushe	Nyangana	Kavango	Namibia	173	198;195	173;176	227	171	201;198	162;165	162;165	218;215	131;128	179	160	184	88;104	155	152;162	224;221;194	136;139	173	168;165	113	134;125	205	173;158;155	100	271
2098	Mabushe	Nyangana	Kavango	Namibia	173	198	176	227	171	198	162	162	218	128	179	160	184	88	155	152	224	139	173	165	113	121;125	205	158	100	271
2099	Mabushe	Nyangana	Kavango	Namibia	173	195;192	170;173	236	171;174	201	162;165	165	215	131;125	179	157	184	104	155	152;149;162	194;206	130;136	173;212;191;194	168;181	110;113	134	205	173	100	238;259
2101	Mabushe	Nyangana	Kavango	Namibia	176	198	176	242	174	198	165	165	212	122	182	160	184	88;107;110	155	155	197	143	173;182	165;187	122	131	221	152	100;110	241
2102	Mabushe	Nyangana	Kavango	Namibia	173	198;189	173	242	171;174	201;198	162;165	162	212;206	134;128	179;182	157	187;184	110	155	165;193	203;212	139	173;152;179;200	177	110;113	131;125	212;218	161;158;164	103;100	238;274
2104	Mabushe	Nyangana	Kavango	Namibia	173	189;192	164;155	258	196	198	165	162	206	128	182	160	187;184	110;101	164;155	152	218	130;136	197	181	97	118	230	185;143	103	277;253;256
2105	Mabushe	Nyangana	Kavango	Namibia	173	198;189;192	170;173;176	227;258	171	198	165	162	206	128	182	160	187;184	88;110;101	164;155	152	224;218	130;136;139	173;194;197	165;181	97	118;125	209;230	185;161	103	277;250;253
2106	Mabushe	Nyangana	Kavango	Namibia	173	198	170	242	171	198	156	165	212	131	179	157	184	129	155	165	194	136	182	174	113	121	209	182	103	274
2107	Mbambi East	Nyangana	Kavango	Namibia	176	195	158	227	171	198	159	165	206	134	179	160	187	101	155	168	203	146	173	187	110	131	218	176	103	268
2109	Mbambi East	Nyangana	Kavango	Namibia	176;173	187;198;192	167;164	258;242	171	204;201	162;156	165	206;197	116;140;128;122	179;182	157;154	187;184	110	164;155	155	197;206	139;143	173;176	190;187;171	110;100;106	121;125	215;212;218	161	103	244;268;271;274;247
2110	Mbambi East	Nyangana	Kavango	Namibia	176	195	167	242	171	201	162	162;165	224;206;227;209	137	170;182	157	190	101	155	152;155	200;203	139	182	181	110;103	121	215;205	136;185;146;149;182	103	253
2111	Mbambi East	Nyangana	Kavango	Namibia	176;173	195;192	167	242	171	204	156	162	215	128;122	179	160	187	101	155	152	200	133;143	200	174	110	118;121	218	161	103;100	247
2113	Mbambi East	Nyangana	Kavango	Namibia	173	198	167	258	171	201	156	165	206	128	179	157	184	110	164	155	206	143	176	190	110	121	218	161	103	247
2114	Mbambi East	Nyangana	Kavango	Namibia	173	198;189;195	170;167	258;242;273	171	201;198	165;156	162;165	206;197	137;128;122	179	157;160	187;184	129;110;101	164;155	155	200;206	143	173;179;176;197;182;203	190;193;181	110;122;119;103	121	215;218;224	136;134;161	103	244;268;262;250;247;265
2115	Mabushe	Nyangana	Kavango	Namibia	185	192	164	242	171	201	156	165	206	131	179	157	184	110	155	189	197	152	179	202	103	121;128;125	215	158;155	103;107	256
2117	Mabushe	Nyangana	Kavango	Namibia	173	195	158	242	171	198	165	165	206	137	179	157	187	110	155	165	197	136	191	181;171	103	140	221	143	103	274
2122	Mbambi East	Nyangana	Kavango	Namibia	173	192	167	258	171	198	162	162	221	125	185	157	187	101	164	168	194	161	179	190	110	118;121	215	155	103	268
2125	Mbambi East	Nyangana	Kavango	Namibia	173	192	170	258	174	201	156	165	212	131	179	157	187	101	155	152	206	143	176	181	103	115	215	149	110	268
2140	Mbambi East	Nyangana	Kavango	Namibia	173	198	164	273	174	201	162	165	206	131	173	160	184	139	155	152	197	139	188	171	110	112	205	161	107	271
2142	Mbambi East	Nyangana	Kavango	Namibia	173	198	164	273	174	201	162	165	206	131;125	173	160	187;184	139;101	152;155	152	197	139	179;188;185	171	110	109;112	205	161	103;107	268;271
2143	Mbambi East	Nyangana	Kavango	Namibia	173	189	185	227	171	198	174	165	212	137	179	157	187	94;110;91	155	165	194	139;143	188;191	171	125;122	128	215	167	103	271
2161	Mbambi East	Nyangana	Kavango	Namibia	176	198;195	170;173	258	171	201;198	162;156	165	215;209	134;125	182	157;160	187;184	107;110;101	155	177;165;174;186	197;200	139	176;188	174;168;181;171	100;113	134;131	215;212;209;218	118;121	107;100	271;274;262;265
2167	Mbambi East	Nyangana	Kavango	Namibia	173	198	161	258	174	201	162	162	206	134	179	157	187	120	155	155	200	139	182	205	103	115	215	152	103	271
2186	Mbambi East	Nyangana	Kavango	Namibia	176	192	161	236	171	198	168	165	212	140	182	160	190	110	155	165	197	139	182	181	110	128;125	215	179	103	271
2188	Mbambi East	Nyangana	Kavango	Namibia	173	195	167;164	242	171;174	219;201	162;159	162;165	212;221;215	134;128;122	179;182	154	187	107;98;110;101	164;155	152;165;168;155	197;200	133;146	209;179;188;200	174;171	110;100;113;103	128;131	199;196	161	103	271
2189	Mbambi East	Nyangana	Kavango	Namibia	176;173	189;195	167	242	171	201;198	162	162;165	206	137;128	170;182	157	190;187	129;101	155	152;155	200;203	139;146	173;152	181	94;110	121	215;209;205	149	103	268
82	Nyangana DH	Nyangana	Kavango	Namibia	173	192	173;164	258;242	165;174	204;201;198	168;156		212	125;122	182	163	187;184	110;120	164;155	177;168	200;206	139;146	173;197	174	136;106	131;125	215	167;161;164	113;103	271;253;265
315	Nyangana DH	Nyangana	Kavango	Namibia	173	208;198;195	170;161	242;248	171	201	159	165	212;215	128;122		157	187;184	107;110	164	168	206;209	139;146	173	165;177	100;103;97	125	212;205	188	103;107	268;262;265
542	Mabushe	Nyangana	Kavango	Namibia	173	198	170	242	171	198	156	165	212	131	179	157	184	129	155	165	194	136	182	174	113	121	209		103	274
558	Mabushe	Nyangana	Kavango	Namibia	173	198	176	227	171	198	162	162	218	128	179	160	184	88	155	152	224	139	173	165	113	125	205	158;155		271
564	Mabushe	Nyangana	Kavango	Namibia	173	192	161	242;288	174	201	168;165	165	206	128	179	157	184	101	164;155	155	194	146	179;200	168	103	115;131	224		107	268
589	Mabushe	Nyangana	Kavango	Namibia	176;173	198	167;161;164	227	171;174	201;198	162;165	155;165	206;197	134;125;122	179	157;154	187;184	110;91;120;101	164;155	152	197;200	152;139;146	173;191;194	168;181;184;177	106;103;116	134;128;131	205;218	167;161;158	103;107
609	Mabushe	Nyangana	Kavango	Namibia	173	187;189;195	167	242	171	198	165	168	212;206;221;215	128	179	160	184	101	155	177	203	149	179	190	110	125	215	167	103
707	Nyangana DH	Nyangana	Kavango	Namibia	173	192	167	242	174	198	162		212	122	179	157	184	113	155	155	197	136	170;167	187	113	118	221	161	103;107	247
713	Shinyungwe C	Nyangana	Kavango	Namibia	176	192		258	174	201	162	162	206	137	182	160	184	101	164	152	197	146	185	171	100	140	205	109;176;164	110	268
1114	Karukuta C	Nyangana	Kavango	Namibia	173	208	170	242	174	201	159	165	206	122	182	160	184	123	164		206	139	173;170	177	97	121	209	185	103;107	262
1115	Karukuta C	Nyangana	Kavango	Namibia	173	208;195;192	170;173	227;258	171;174		162;165	162;165	221	122	179;182	160	187;184	91	164	168;155	194;197	143	173;152;179;200;170	190;187	100;122;103	121;128;115;125	224	152;149;161;155;164	103;97	268;277;262;250;253
1118	Katere C	Nyangana	Kavango	Namibia	173	204	158	242	165		162	162	221	131	167	157	187	123;120	155	152	197	136	173	171	110;100	128	215	161	107	262
1119	Katere C	Nyangana	Kavango	Namibia	173		173;176	227	171	201	162;165	165	206	128	160;179	160	187;184	139;120	155	168;189	197;212	149;146	179;176;170;182	177	106	121	221;212	161;158	103	268;271;265
1122	Nyangana DH	Nyangana	Kavango	Namibia	179;173	192	173	242		201	162;156	162	206	125;122	179;182	157	184	110	155	165	194;206	136;149	173;176	143;171	88;103	115;112	215	158	103;100	253
1129	Katere C	Nyangana	Kavango	Namibia	176;173	192	176	227;242	191;174	201	162;165	165	206	128	182	160;163	187;184	129		152;177;155	194;197;203	136	173;188;191;170	174;168;165;184	106;97	134;121;125	205	200;170;167	113;90;103;100	303
1137	Nyangana DH	Nyangana	Kavango	Namibia	173	204	173	248	171	198	165		227	137	179	157	184	107;110	164	155	200	143	173	165	94;122	112	215	188	103	268
1141	Katere C	Nyangana	Kavango	Namibia	176;173	198	170;176	242	171;174	198	162;156;159	165	206	128;122	179;167	157;160	187	129;110;101	164;155	165;168;202	194;197;206	139;149	179	184;140	113	134;125	221	161;158;164		271
1156	Nyangana DH	Nyangana	Kavango	Namibia	173		173	242	171;174	201	168;162	162	206	140	179;182	160	187;193	123;104;101	155	168	197;206	139	173;176	177	110;100;97	121;131	209;218	136;134	103;107;100;97	268;271
1164	Katere C	Nyangana	Kavango	Namibia	173	189;195	170;176;158	227;242	171	201	165	165	212	131;128;122	179		187	110;101	164;155	168;202	194	136;149;146	191;185;182	168	103	121;112;131	212	143;155	103;100	286;250
1168	Katere C	Nyangana	Kavango	Namibia	176	192	179	242	171	201	162		206	122	179	160	187	110	155	171	203	136	194	184	113	131	212	176	103;100	262
1169	Nyangana DH	Nyangana	Kavango	Namibia	176	192	179	242	171;174	201	165;159	165	206	122		160	187	110	155	171	200	136	173;164;191;194	184	106;113	131	212	170;173;179;176	103	280;262;265;259
1170	Nyangana DH	Nyangana	Kavango	Namibia	173	198;195;192	158	242	174	198	162	165	212;218	122		166	184	113	134;137	155	197	155	170	187	113	118	221	161	103;107	247
1178	Karukuta C	Nyangana	Kavango	Namibia	173	198	161	227	174	198	162	168	197	122	182	184	184	101	143;149;137;146;152	155	197;200		191	177	88;103	118	209	188	103;107;100;110	256
1183	Nyangana DH	Nyangana	Kavango	Namibia	182;173	198;189		227	171	198	162;165	162;165	218;215	119;128	179;182	157	187;184	88;113	164;155	152;155	224;197	139;143	173;200;170	165;181	113	134	215;205	161;158	103;100;97	271;250
1184	Katere C	Nyangana	Kavango	Namibia	173	198	164	258	171	198	162	165	215	128	157;179;182	154	184	104;101	155	177	200;203	136;139	173;170	177	97	128;125	221		103	262;265
1185	Katere C	Nyangana	Kavango	Namibia	173	195;192	170;173	258	171	198	165	162;165	212;206	134	182		184	120	164	168	218;197	130;152	173	174	113;103	121;128	209	188;170	94;103	271;253;256
1187	Katere C	Nyangana	Kavango	Namibia	173	198	164	258	171	198	162;165	165	215;209	128	179;182	157	184	104	155	177	203	139	173	177	97	134;128	221		103;100	262;265
1188	Katere C	Nyangana	Kavango	Namibia	173	192	164	242	171	198	162;159	165	197	140;137	182;154	151;154	184	110;120;116	155	165	162;194;197	136;139	173;182	181	106;103	121;131;125	212		107	274
1195	Katere C	Nyangana	Kavango	Namibia	176;173	202;195	170;158	227	171	198	159	162	206;215	125;122	167	160		91;101	155	152;155	197	146	173;152;191;170	177	110	134;125	209	167;176	107;110	271;241;253;259
1198	Nyangana DH	Nyangana	Kavango	Namibia	176;173	202;192		242;273	174	201;198	162;165	165	212;218	134;131	179	157;160	184	120	155	158;165	197;200	143;158	179;188	181	100;119;103	137;125	215;227;221;224	176;161;155;164	103	223;241
1204	Shinyungwe C	Nyangana	Kavango	Namibia	173	189	170	242	171	204	162	162	206	131	179	157	187	120	164	168	197	152	173	184	110	140	215	173		274
1207	Shinyungwe C	Nyangana	Kavango	Namibia		195	161	242	171	198	165	165	206	131	179	160	187	110;113	164	177	215;218	139	200	165	100	125	215	161	103;107;110	244;247
1208	Shinyungwe C	Nyangana	Kavango	Namibia	173	198	167	261	182;171	201	168	162	212	134;137	160;179	160	184	82;139;129	172;137	155	203;206	152;149;155	179;182	137	106;103	128;131	218		103;107;100	268
1214	Shinyungwe C	Nyangana	Kavango	Namibia	176	198;195	167;176	227;242	171	198	165	165	212;209	125;122	179;182	157	187	129;101	155	152;155	197;212	139	176;185	181	119;116	118;131		173;158	100	247
1215	Shinyungwe C	Nyangana	Kavango	Namibia	176	192	167;161	242	171	201	162;165	165	206	128	182	160	187	110	155		197	139	191;194;182	137	91	128	215	158	103	268
1225	Shinyungwe C	Nyangana	Kavango	Namibia	173	189;195	170;167	227	171	201	162;165	165	212;206	128;125	179		187;184	107;110;91;101	146	171;152;165;189	200;206	139;149	176	187;177	103;91	121;115;125	218	173;164	103;100	271;274;259
1226	Shinyungwe C	Nyangana	Kavango	Namibia	176	198;189	170	245	171	201	165;159	162;165	218;209	112;125	179	157		110;113	164;155	152;165;168;155	197	139	173	168;181;177;171	106	121;131	199;212;205;218;202	170;173;167;164	103;97	283
1236	Shinyungwe C	Nyangana	Kavango	Namibia	176;173	192	179	242	171	201	162;159	162;165	206;215	119;128;122	160;179	157;160	187	107;110;113;91;120;101	155	171;177	197;200;203;191	136;139;133;143;146	173;191;194;185;170;182	165;184	110;113	121;131	212		113;103;107;100;97	262
1249	Shinyungwe C	Nyangana	Kavango	Namibia	176;173	189;195;192	173;167;179	258;242		201	174;162	168;165	212;221;218;209	125	179	157;160	187;184	129;110;120	155	152;180;177;168	203;206;209	136;139;149;146	179;176	181;184;177	113;116	121;131	221;212;209;205	161;155	103;100;97	268;271;250;247;253
1277	Shinyungwe C	Nyangana	Kavango	Namibia		198;195	167;164	258;242;273	171;174	201	162;156	165	206;215	131;128;122	173;179;182	157;160	187;184	139;129;110;113;120	172;155	152;189	194;197;191	139;149;143	188;170;182	165;171	103;91	134;128;112;125	205	182;161;158;164	103	268;271;247
1278	Shinyungwe C	Nyangana	Kavango	Namibia	176;173	198;189;195	170;173;167;161;179;164;158	227;258;242;273	177;174	204;201;198	162;156	165	206;215	131	157	157;160	187;184	107;139;129;110;113;91;120;101	172;155	152;189	194;197;200	136;139;149;143	173;179;188;194;185;170;182	177;171;196;202	110;113;88;103	134;112;131;125	205		103;107;100;116	271;280;262;247
1281	Shinyungwe C	Nyangana	Kavango	Namibia	173	187	170;167	227	171	201	165	165	206	122	173;160;179	160	187	110;120	155	152;165;168;155	197	139;143	188;200	177;171	110;88;91	112	209		107;100;97	280
1385	Ndonga Linenea	Nyangana	Kavango	Namibia	173	192	161	242	174	198	165	165	212	122	182		184	110	134;137	155	197	155	170;167	187	122	128;131	221	152	107;110	241
1386	Ndonga Linenea	Nyangana	Kavango	Namibia	176	195;192	167	242		219	162	165	212	128	182	157	184	82;107;110;91	164	177	218	139;143	176	184	103	131	218	155	103;100	256
1396	Ndonga Linenea	Nyangana	Kavango	Namibia	173	192	170	258	179;174	198	156	165	206	125	179	157	187	110	164	155	156;194;197	139;143	179;176	187	103	128	212		103	283;280;277
1399	Ndonga Linenea	Nyangana	Kavango	Namibia	173	198;195	173;167;161	227;242	171;174	201;198	162;156	162;165	212;206;209	137;128;125	185;179	157;154	187;184	110;91;101;116	164;155		197;200;203;206;212	136;139;149;146	173;179;176;191;170	174;184;177	100;103	121;115;131;125	215;199;205	182;161;158;164	103;110	244;286;235;268;271;241;274;277;250;247;253;265
1418	Ndonga Linenea	Nyangana	Kavango	Namibia	173		170	242;245	171	201;198	162;156;159	162	206;221;209	128;125	167	157	187;184	120;101	164;155	168	162	136;139	173;182	190;187;181	125	121;115	215;218	167;161;164	103	235;253
1419	Ndonga Linenea	Nyangana	Kavango	Namibia	173	198	158	242	171	201	156	162	209	125	179		184	120	137	168	206	155	173	177	103	115	215	158	103	253
1432	Ndonga Linenea	Nyangana	Kavango	Namibia	173	189	161	258	171	198	165	165	221	122	179	178	187	98	134	165	218		173;176	174	122;88	131	209	170	113;110	274
1442	Ndonga Linenea	Nyangana	Kavango	Namibia	173	198;192	167;164	258	171	201;198	156	165	212;206;221;215	122	179	160	187	110	155	165;174;162	194;203	136;139	158;161	168;165	113;116	128;131	209	167		277
1443	Ndonga Linenea	Nyangana	Kavango	Namibia	173	198		230;227;242	171	198	162	165	206;215	128;122	179	160	187;184	120;101	164;181	171;168	194	136	179;188	174	110	131;125	209	182	97	241
1447	Ndonga Linenea	Nyangana	Kavango	Namibia	173	189;195	167;164	242	171;174	201;198	162	162	212;206;209	131;119;128;125	170;157;179;182	157;154	187;184	82;98;129;110;91;120;101	164;155	152;155	162;200;203	136;139;133;146	173;152;179;176;197;170;182;203	147;171;140;156	110;100;103	118;121;137	209		103;100	268;271;247;253
1448	Ndonga Linenea	Nyangana	Kavango	Namibia	176;173	208;198;195	158	227	171;174	201;198	162;165	165	212;209	119;128;125;122	179;182	169;172		110;120;101	134;140;137	152;180;177	209;212	155	176;182	147;177;171;140;196;153	100;103	121;128;131;137	215;212;209;218	158;155;164	103	244;268;271;262;250;247;256
1456	Ndonga Linenea	Nyangana	Kavango	Namibia	179;176	195	173;158	258	171	198	162	162	206;209	122		160	184	129;110;120	155	177	203	139;143	173;176	177	125;88;103	121;125	205	167	103;110	271;253
1465	Ndonga Linenea	Nyangana	Kavango	Namibia	173	189	176	242	171	201	162	162	221	125		157	187	82;129	164	155	218	143	191	165	110	125	218	143;109;197;161	110	247
1561	Nyangana DH	Nyangana	Kavango	Namibia	173	195	173;193	242	165;174	201;198	156	162	212	134;140;122	179	157	187	110;120;116	164;155	168	200;209	143	194;197	174;181;177	110	128;125	215;218		113;100;97	271
1562	Nyangana DH	Nyangana	Kavango	Namibia	173	198	176	227	171	198	162	162	218	128	179		184	88	155	152	224;221;227	139	173;170	165;184	110;113;116	125	205	161;158;155	100	268;271
1564	Nyangana DH	Nyangana	Kavango	Namibia	176	192	173	227	174;188	201	168	162	209	128	157;182	157;160	184	110;113	172	149	194;197	133	188;191;185	171	100;103	125	218	194		271
1568	Karukuta C	Nyangana	Kavango	Namibia		198	173;176	227;258	165	201	162;156	162	212;218	128;122	179;182	163	187;184	88;107;110;91	164;155	152;177	224;200	139;146	173;176;194;197	174;168;165	136;113	125	215;209;205	167;158;155;164	113;100;97	292;268;271;274;250;253
1572	Karukuta C	Nyangana	Kavango	Namibia	173	195		227	165;171	198	174;156	162;165	206	125	179	157	184	110	164;155	165	194;191	130	197;203	184;171	125	131	215	179;176;158	113;103;100	253
1578	Nyangana DH	Nyangana	Kavango	Namibia	173	192	161	242	174	201	168	165		143	179	160	184;181	120;116	155	155	168;194;191	146	179;182	168;165;184	100;106;103	131	209	170;173	103;107	271
1585	Nyangana DH	Nyangana	Kavango	Namibia	173	195	176	258	174	219	162	165	209	128		157	187	82;129;110;91;120;101	155	177	218	136	173	184	100	131	218	152	103;100	271;274;256
1591	Karukuta C	Nyangana	Kavango	Namibia	173	198	173	242;248	171;196	204;201;198	162	162	215	122	179		187;184	120	155	152	194;197	136	200;194;197	181;184;177	106;113	118;121	215;205	164	103	271
1596	Karukuta C	Nyangana	Kavango	Namibia	179;173	187;192	170;185	242	171	201;198	165	165	206	125	179	160	187	88;98;120;101;116;79	155	165	197;209	143	173	165;177	100;91	128	209;205		100;97	283;271;280;262
1609	Karukuta C	Nyangana	Kavango	Namibia	173	198	158	242	171	198	162	162	212	134;137;128;125	182	166	187;184	94;120	140	152	200		173	143	97	131	221;224	158	103;100	235;238;253
1616	Karukuta C	Nyangana	Kavango	Namibia	173	198	161	242	174	201	162	165	212	131	182	157	184	110	155	168	206	139	191	177	106	131	205	109;158;155		283
1618	Karukuta C	Nyangana	Kavango	Namibia	173	198	161	242	174	201	162;165	165	212	131;122	182	157	184	110	155	168	197;203;206;209		191	177	106	131	205	161;158;155	103	286;283;241;280;265;259
1622	Nyangana DH	Nyangana	Kavango	Namibia	173	198	176	227	171	198	162	162	218	128	179	160	184	88;85	155	152	224;221;227	139	173	165;184	113	125		158;155	100;97	271
1624	Nyangana DH	Nyangana	Kavango	Namibia	176;173	195;192	167;161	258;242	171	198	165;156		212;221	143;122	179;182	160;163	184	120;101	155	177;165;168	194;197	149;143	173;152;179	190;187;181;184	106;113	121	212;209	149	103;97	250;253
1625	Nyangana DH	Nyangana	Kavango	Namibia	176	192	179	242	171	201	162	165	206	122	179	160	187	110	155	171	200;203;206	136	194	184	110;113;116	131	212	173;179;176		262
1628	Nyangana DH	Nyangana	Kavango	Namibia	176	192	173	227	179;171		162	165	206	134	179	157	187	91	155	155	212	149	179;176	187;171	94;97	128	218	185;188;182	97	274
1634	Karukuta C	Nyangana	Kavango	Namibia	173	202	173	258	165;196	201	156	162	212;209	119;122	160;182	160	187	82;107;110;91	164	177	200	143;146	194;197	174;193		121;125	215	164	113;110;116	271
1636	Karukuta C	Nyangana	Kavango	Namibia	176	198	158	242	174	198	159	162	206	128	179	175	187	101	140	165	206		179	184	110	125	209	121;158	103	271
1640	Karukuta C	Nyangana	Kavango	Namibia	173	198	161	227	171	198	162	162	218	128		175	184	88	140;137	152	224;227	155	173	165	113	125	205	158;155	100;97	268;271
1641	Karukuta C	Nyangana	Kavango	Namibia	173	202;189;195	173	242	174	198	162		212	125	173	160	187	110	164	152	194;197	146	173	196	94	125	205	167	103;100	262
1642	Nyangana DH	Nyangana	Kavango	Namibia	173	187;192	167;161;164	258;242	165;171		162;165	162;165	212;215	122	179;182	157;160	187;184	110;120;101	155	165;168	197;200	133;143;158	173;185;170;182	171	113;103	134;125	209;205	167;176;161;158	113;103;107;100	244;232;235;247
1643	Nyangana DH	Nyangana	Kavango	Namibia	185	192	164	242	179;171	201	156	165	206	131	179	157	187;184		146;155	189	156;194;197	152	179;176	184;202	100;103	134;128	215	161;155	103;107	256
1749	Mbambi East	Nyangana	Kavango	Namibia	173	195	164	242	171	198	143	165	206	128	182	157	187	101	155	168	200	136	173	171	103	121		176	103	268
1755	Mabushe	Nyangana	Kavango	Namibia	173	195	176	242	171	201	165	165	221;215	134	179	157	187	110;113;104	155	168	194	136;146	191	168	103	134;131	212;209	143	103;100
1769	Katere C	Nyangana	Kavango	Namibia	173	189	167	258	171	198	162	165	212	128	179	175	187	94;101	155	171	200	139	176	177	91	115	218	173	103
1770	Katere C	Nyangana	Kavango	Namibia	173		170	258	171	201	162	162	212	122	179	160	184	120;101	164;155	177	191	149	179;176	165	110;91	128	215	149	113	268
1789	Katere C	Nyangana	Kavango	Namibia	173	198	170	227;273	171	201	162	162	206	131;122	179	157	187;184	123;120	155	165;168	203	136	176	174	110	121		173	94	274
1791	Katere C	Nyangana	Kavango	Namibia	173	189	173;167	242	171	201;198	162	165	206	125	179	157	187;184	101	164	152	200	136;139	173	187;184;177;162	106;91	121;115	218;224	152	103;107
1792	Katere C	Nyangana	Kavango	Namibia	176;173	187;198;189;195	170;176;161	242;245	171	201;198	162;165;156	162;165	212;206;218;215;209	112;128;125;122	185;179;182	157	187;184	88;129;110;113;120;101	164;155	171;152;168;155	194;197;200;191	136;139;146	206;173;179;194;185;197;170	193;168;171;140	94;100;106;103	149;121;128;115;131;125		170;167;152;149;161;158;164	103;107;110;97	244;232;283;271;229;250;247
1815	Katere C	Nyangana	Kavango	Namibia	176	198	176	258	171	201		162	212	112;128	179	157	187	101	164;155	168	200	143	209;173	184	110	121	218	170;167	97	286
1817	Katere C	Nyangana	Kavango	Namibia	173	192	167	258	171	201	162	162	221	125	179	157	184	101	155	168	194	158	176	187	110	121	215	158	103
1838	Katere C	Nyangana	Kavango	Namibia	173	198;195	173;161	227	171;174	201;198	162;159	162	224;206	122	179;182	157;160	187	110;101	164;172	168	194	139	173;191	177	106	128;131	212	170;167;164	100
1840	Katere C	Nyangana	Kavango	Namibia	173	195	176	242	171	201	165	165	212	125	179	157	187	101	164	168	194	146	182	168	103	121	212	143;146;140;203	103
1850	Karukuta C	Nyangana	Kavango	Namibia	173	208	161	258	171	198	162;156	162	206	122	179	169	187	120	140;137	168	194		200	190	106	134;121	215	170;167	103;100	268
2029	Mabushe	Nyangana	Kavango	Namibia	176;173	198;195;192	167	227;258		201;198	162;165	155;162;165	206	143;128	179;182	157	187;184	88;107;98;110;120;101	155	168;155	194;200	152;139	173;179;176;191	168;184	110;106;103	118;134;128;125	209;218	167;158	103;100	268;271;274
2030	Mabushe	Nyangana	Kavango	Namibia	173	198	185	242	174	201	165	152	215	125	182	157	184		155	168	212	152	206	174	113	131	218	109;134;179	103	283
2031	Mabushe	Nyangana	Kavango	Namibia	176;173	198;192	176;164	227;242	171	201;198	162;165	165	212;206;209	131;128;125;122	179;182;176	157	187		164;137;146;155	152;168;155	197	152;143	173;176;185;170;182	181;177	113;119;103;116	118;140;131	215;212;209;218	173;167;179;158;164	103	268;250;247;253
2032	Mabushe	Nyangana	Kavango	Namibia	173	198	176;161	227	171	198	162	162	218	128	179	160;187	184	88	155	152	224;194	139	173	165	113	121;125	205	158	100
2037	Mbambi East	Nyangana	Kavango	Namibia	173	204	167	242		198	162	162	212;206;197;215	122	179	157	187	101	164;155	152	200	149	173	171	110;100	125	221	158	103	247
2038	Mbambi East	Nyangana	Kavango	Namibia	173	198	161	227;242	171	201	162;159	165	224;206;215	131	179	157	187	120	164	168	221	139		174	100	134;125	209	158	103;100	256
2040	Mbambi East	Nyangana	Kavango	Namibia	173	192	173	258	171	201	156	165	212;197;194	125;122	179	157	184	110	155	152	191	152	179	184	110;100;97	121;131	205	164	110
2041	Mbambi East	Nyangana	Kavango	Namibia	176;173	198;189;192	170;173;161	227;258;242	171;174	201;198	162;156	162;165	212;206;197;194;215	134;125;122	179;182	157;160	184	110;113;120;101	164;155	152	200;191	152;133		184;177	110;100;103	121;131;125	215;209;205	152;161;158;155;164	103;100;110	268;271;253;265
2048	Mabushe	Nyangana	Kavango	Namibia	173	189	173	242	171	201;198	165	165	212	131	179	157	187	107;110	164	165;168	200;206	136	185	143;150	103	115	218	161	107
2051	Mabushe	Nyangana	Kavango	Namibia	173	198;189	164	227	171	201	165	162	215	128	182	157	184	110	146	168	200;203	139;143	200;215	184;171	103	134	215	161;164	100
2054	Mabushe	Nyangana	Kavango	Namibia	173	198	176	227	171	198	162	162	218	128	179	160	184	88	155	152	224	139	173	165	113	125	205	158		271
2055	Mabushe	Nyangana	Kavango	Namibia	173	195	176	242	171	201	165	165	221	134	179	157		113	155	168	194	146	191	168	103	128;131	212	143	103	283
2061	Mbambi East	Nyangana	Kavango	Namibia	173	192	173	258	174	226	168	162	206	125	179	157	184	101	164	165	194	143	188	184	110	118	209	155	107
2063	Mbambi East	Nyangana	Kavango	Namibia	173	192	173	258	171	201	156	162;165	212;194;215	125;122	179		184	73;110;120;101	155	152	191	152	179;176	184	110;100;97	121;131;125	215;205	161;158;155;164	107;110	268;253;265
2065	Mbambi East	Nyangana	Kavango	Namibia	176;173	198;189;195;192	170	242	171;174	201	171;162;159	162;165	206;215	137	170;179;182;167	157	187;178	129;110	164;155	165;168;155	197;200;203;206	152;139;146	173;152;179;182	181;184	110;106;103;116	121;128;125		136;146;152;149;182;161;155	97	268;271
2066	Mbambi East	Nyangana	Kavango	Namibia	173	192	167	273	171	198	162	162	197	128	179	160	187	110;113	155	165	200	136	203	174	116	121	224	170	100
2067	Mbambi East	Nyangana	Kavango	Namibia	173	189	170;167	242;248	171	201;198	162	162;165	206;215	134;128	179;182	157	190;187	110;101	164;155	152;165;168;155	203	152;146	185;182	181;171	103;116	134;121		191;185;170;173;167;152;182;164	103	268;253
2068	Mabushe	Nyangana	Kavango	Namibia	176	204	173	245	171	201	168	165	215	122	179	160	184	101	155	171	194	139	191;194	165	103	134		167	113	268
2069	Mabushe	Nyangana	Kavango	Namibia	173	195;192	170;158	258;242	171;174	201;198	162;165	165	206	131;128	179;182		184	107;110;120	164;155	152;168	200	130;152;146	173;182	165;184	106;97	118;128;131;125	215;218	146;158;155	103;100	268;271;250;253
2070	Mabushe	Nyangana	Kavango	Namibia	173	192	170	242	171	201	162	165	206	134	179	157	184	113	164	152	200	139	185	187	106	118;121		152	107	271
2077	Mabushe	Nyangana	Kavango	Namibia	173	192	179	242	171	198	180	165	206	122	182	160	187	110		152	200	149	188	174	100	121	221	152	110	277
2082	Mabushe	Nyangana	Kavango	Namibia	176;173	198;192	167;164	227;242	174	201;198	162	155;165	206	134;143	179	157;160	184	110;120;101;116	155	152;155	194;197	139	173;182	168	106;103	134	209;205		107	271;202
2087	Mbambi East	Nyangana	Kavango	Namibia	173	192	164	242	171	201	162	165	197	140	182	154	184	110	155	155	197	139	173	187	106	125	212	161	103
2090	Mbambi East	Nyangana	Kavango	Namibia	173	198;189;195;192	167	242	171	201;198	162	162;165	206	137;128;125	170;179;182	157		129;120;101	155	152;155	203	139;146	173;182	181	110;100;103	121	215;205	136;146;170;149;182	103	268
2095	Mabushe	Nyangana	Kavango	Namibia	173	198;189	173;176	227;242	171	198	162;165	162;165	212;218	131;128	179	157;160	187;184	88;107;110	164;155	152;165;168	224;206	136;139	173;185	174;165;150	113;103	115;125	205;218	161;158	107;100
2100	Mabushe	Nyangana	Kavango	Namibia	173	198;195;192	170;158	227;258;242;236	171;174	201;198	162;165	162;165	206;218;215	131;128	179;182	157;160	184	88;107;110;120;104;101	164;155	152;168;162	194;200	152;136;139;146	173;182	168;165;184	110;106;113;97	134;131;125	215;205	173;161;158;155	100
2108	Mbambi East	Nyangana	Kavango	Namibia	173	198;195	167;164	248	174	201	159	165	212	131;128	179	157	184	101	164	168	197	139	176;185	171	113	121		161	103	286
2118	Mabushe	Nyangana	Kavango	Namibia	176	195	167	242	171	201	162	165	209	125	179	157	187	123	155	152	197	136	191	174	91	131	218	170	110
2120	Mabushe	Nyangana	Kavango	Namibia	173;164	198;189;195;192	167	227;258	171;174	201;198	150;162;165	162;165	212;206;197;203	128;125	179;182;167	157;160	187;184	107;98;110;120;101;116	164	152;165;168;155	197;200	136;139;149;146	152;179;176;200;182	184;177;171;208;196	94;110	118;121;125	205;218	170;152;149;161;158	103
2123	Mbambi East	Nyangana	Kavango	Namibia	173	189;195;192	173;167;185	227;258	174	201;198	165	165	206	128;122	179	157	184	98;101	164;155	152;165;168	200;206	136;139;143	176;191;197;170	181;171	113;122;91	134;140;128	215;205	152	103
2141	Mbambi East	Nyangana	Kavango	Namibia	173	189		227	171	198	174	165	212	137	179	157	187	94;91	155	165	194	143	188;191;194	171	125	128	215	167	103	268;271
2144	Mbambi East	Nyangana	Kavango	Namibia	173	192	170	258	174	201	156	165	212	131	179	157	187	101	155	152	206	143	176	181	103	115		149	110	268
2162	Mbambi East	Nyangana	Kavango	Namibia	173	189	173	242	174	201	162	165	215	125	179	163	187	120	155	168	203	146	179	140	113	134	205	121;170	103
2187	Mbambi East	Nyangana	Kavango	Namibia	176	204	173	242	171	219	162	165	212	140	182	154	184	110	155	152	200	139	173;182	174	106	128;125	212		103	256
2190	Mbambi East	Nyangana	Kavango	Namibia	176;173	198;189;195	167	242	174	204;201;198	162;159	165	206;221;215	128;122	170;182	154	187;184	129;101	155	152;165;168;155	197;200;203;206	139;133;146	173;179;188	181;171	110;113;103	118;121;131	193;196	146;149;182;161;164	103;97
2207	Mbambi East	Nyangana	Kavango	Namibia	173	195	164	242	171	201	159	165	206	134	167		184	110	155	152	197	136	173	168	113	128;125	199	161	103	265
2306	Mabushe	Nyangana	Kavango	Namibia	173	198	185	242	171	198	162	165	212	122	179	157	184	113	155	168	212	152	146	196	113	118	209		107	247
2344	Karukuta C	Nyangana	Kavango	Namibia	173	195	170	227	171	201	165	165	206	125	179	157	184	110	146	189	206	149	149	187	103	125	218		103	274
535	Mabushe	Nyangana	Kavango	Namibia	176;173	189;195	170;167	258;242	171;174	198	162;165	165	212;206	119;122	179;182	157	187;184	123;129;110;113;120;101	164	177;168;155;162	218;200;206	130;139;143	173;200;194	181;184;171	106;91	121;128		185;161;155	103;100
612	Mabushe	Nyangana	Kavango	Namibia	176;173	202;187;198;189;195;192	167;176;161;164	227;258;242		201;198	168;162;165	162;165	212;206;218;215	128;122	179;182	157;160	187;184	88;98;110;91;101	164;155	152;165;155	194;197;200;203	136;139;149;146		168;165;177;171	100;106;113;103;91	121;128;115;131;125	212;209;205;224	167;161;158;155	103;107;100	268;241;259
703	Nyangana DH	Nyangana	Kavango	Namibia	173	195;192		242	171;174	201	162	165	206	125	179	157	187	107;98;101		165	200	146	194	174	110	115	215	152	103	235;268;238
716	Karukuta C	Nyangana	Kavango	Namibia	173		173	258	165	201	156	162	212	122	182	160	187	110	164	177	200	146	200;194	174	136;97	125	215		113;103;110	271
867	Nyangana DH	Nyangana	Kavango	Namibia	173	195		258	171	201	162;156	165	206	122	179;182	157	187	120;101		165;155	203	139;146	179;212;200;191;170	168	106;91	128;125	224	143	103;107	268
880	Nyangana DH	Nyangana	Kavango	Namibia	176	198		242	171	201	162	165	206	131	179	157	187	139		155	194	143	191;182	177	113	140	215	155	103	268
886	Nyangana DH	Nyangana	Kavango	Namibia	173	192		242	171	198	162	162	212	122	179	157	184	104		171	203	158	179	171	110	128	205	146	103	265
887	Nyangana DH	Nyangana	Kavango	Namibia	173	192		242	174	198	162	165	212	122	179	157	187;184	113		155	197	136	170	187	113	118	221	149	107	247
895	Nyangana DH	Nyangana	Kavango	Namibia	173	187;195		242	165;174	198	162;159	162;165	206;215	122	179;182	157	184	82;132;139;129;110;113		152;165;168;155	197;206	139;149;143	173;179	174;171	94;119;103;116	140;128	209;205	146	103;100	250;253
900	Nyangana DH	Nyangana	Kavango	Namibia	173	192		227	171	198	165	162	212	134	185	157	184	110;120		152	212	136	182	181	100	137	212	152	107	250;247;253
902	Nyangana DH	Nyangana	Kavango	Namibia	173	192		242	171	201	156	165	212	122	179	160	187	101		168	197	139	209;182	184	116	115	209	164	100	280
906	Nyangana DH	Nyangana	Kavango	Namibia	173	195		242	171	201;198	165	165	212;206;221;215	134	179	157	187	110;113		165;168	194;197	136;146	191	168	103	140;131	212	130	103	283;274
912	Nyangana DH	Nyangana	Kavango	Namibia	173	198;189;192;204		227;258;242	171;174	201;198	162;159	165	215	140;131;128;125;122	179;182	157;160	187;184;181	88;91;101		158;152;165;168;155;162	200;203	136;139;133;143	179;176;188;185;170;182	174;168;165;184;177;171	113;103	118;121;128;131;125	215;199;212;209;205	146	113;103;107;100	268;271;250;253
926	Nyangana DH	Nyangana	Kavango	Namibia	176	204		211	174	201	162	162	206	122	179	157	187	110		168	206	139	191	171	94;110	125	221	146	107	256
937	Nyangana DH	Nyangana	Kavango	Namibia	179	195		258	174	204	165	165	212	125	182	160	187	110		155	197	143	149;203	187	97	128	215	149	100;97	274
938	Nyangana DH	Nyangana	Kavango	Namibia	173	198		258	171	201	168;165	165	206;221	134;140	179	160	187	110;113;101		152;165;168;155	197;200	152	176;191	174;184	113;103	118	212;209	170	103	286;283;289;280;265
1140	Katere C	Nyangana	Kavango	Namibia	173	195	173	227	171	198	162		221		182	157	184	110	164	168	197	139	188;191	165	119	128;131	209	158;155;164	103;100	262
1153	Katere C	Nyangana	Kavango	Namibia	173	189	161	248	171		162	152	221	143	179	157	187	129	155	174	200	133	182	171	94	121	212		103	268
1154	Katere C	Nyangana	Kavango	Namibia	173	189	158	242	171	201	162	165	206	125		172	184	101	134;137	152	200		173	187	106;88	121	224	152	103;107	268
1159	Karukuta C	Nyangana	Kavango	Namibia	176	198	173	258	171;177	201	156	165	212	137			187	101	155	165	197	146	173	181	100	115	221	158	110	268
1172	Katere C	Nyangana	Kavango	Namibia	173	189;195	161	258;248	171		162;156	152	212	143	179	157;163	187;184	129;120	155	168;174	194;197	133;149	179;182	171	94	121;131	212	143;152;149;161;158		268;271;250;253
1176	Katere C	Nyangana	Kavango	Namibia	173	195		242	174	201	162	165	212	137	182	157		110	155	152	218	139	170	184	119	121	224	185	107	271
1180	Karukuta C	Nyangana	Kavango	Namibia	173	198	161	227	174	198	162	168	197	122	182	190;184	184	101	149;152	155	200		191	177	103	118	209	188		256
1191	Katere C	Nyangana	Kavango	Namibia	176;173		170;158	227;242	174	201;198	162;159	162;165	206;215	125	167		187;184	91;101	155	152;155	197	146	173;152;191;170;167	190;177	110;116	134;125	209;205	167;176	103;107	271;241;253;259
1212	Shinyungwe C	Nyangana	Kavango	Namibia	179;173	195;192		211	171	201;198	168	165	206;221	122	173;179	157		113;101;116	164	152;168;155	197;200	139;146	212;191;182;203	171	110;106	131;125	193;196	143;146;155	107;100	268;253
1213	Shinyungwe C	Nyangana	Kavango	Namibia	173	198;195		242	171;174	201	156	165	212	122	179	157	187;184	139	164	168	194;191	139;146	173;170	165;177	113	121;128;131;125	215		103	271;274
1217	Shinyungwe C	Nyangana	Kavango	Namibia	176;173	198;189;195	170;173;167	242	171		162;165	162;165	206;197;209	112;140;125	179	157;154	187;184	139;110;113;101	155	152;165	197;200;191	152;139;149;143	173;152;164;176;185;149;161	174;177	110;106;91	118;128;131;125	212;209;205;218	173;152;161;155;164		268;271;274;277;265
1218	Shinyungwe C	Nyangana	Kavango	Namibia	179;176;173	202;192		242	171	198	162;165;156	162;165	212;206;209	149;122	185;179	157;160;154	184	101	164;172;155	171;168	215;203	139;143	173;191;170;182	171	110;100;106;113;103;97	118;128;131;125		164	103;100	286;268;289;274
1229	Shinyungwe C	Nyangana	Kavango	Namibia	176;173		170;167;161	227;258;242	171	201	162;165	165	212;206	116;125;122	179	160	187	94;98;110;120	155	171;177;168;155	197	136;143;146	179;176;200;197	181	116;91	134;121;128	212;209;205;218		103;100	283;280;262;250;247
1237	Shinyungwe C	Nyangana	Kavango	Namibia	179;176;173	192	173;167;179	258;242	171;174		162	168;165	212;206;221;215	140;128;125;122	179		187;184	110;120	155	171;152;177;165	197;203;209	136;146	173;188;194;185;197;182	181;184	100;113;116	121;140;131	212;205	173;179;176;161	103;110;116	262;250;247;265
1241	Shinyungwe C	Nyangana	Kavango	Namibia	173		161;164	227;242	171	201;198	162;165;156	162;165	212;215	137;131;128;125;122		157	187;184	98;110;120;101	155	152;177	197	130;136;139;158	206;176;191;185;197;170	181;171	94;110;100	118;121;128	227;212;209;205;218	170;173;167;161;164	103;107	262;250;247;265
1273	Shinyungwe C	Nyangana	Kavango	Namibia	173	187	170;167	227	171	201	162;165	165	209	119;125	160;179	160	187	110;120;101;116	155	168	197	136;143	200;191;197;203	177	94;88;91	128;125		197		280;277;262
1275	Shinyungwe C	Nyangana	Kavango	Namibia	176	198	161	242	174	201	162	165	206	125		172		101	146	168	218	155	173	174	91	128	215	158	107	247
1280	Shinyungwe C	Nyangana	Kavango	Namibia	176;173		173;176	242	171	201	159	165	212;206	125	179		187	110	164	152	162;200	139;143	173;194;182;203	181	103	121;128	221;209	188;176;161	100;97	229
1286	Shinyungwe C	Nyangana	Kavango	Namibia	173	192	167	227	171		174	165	206	125	182	160	187	94	155	165	194	158	188;191	171	125	131	212	109;161;158;164		271
1384	Ndonga Linenea	Nyangana	Kavango	Namibia	173	198		242	171	201	156		209	125	179	157	184	120	155	168	206	136	173	177	103	115	215	158	103	253
1401	Ndonga Linenea	Nyangana	Kavango	Namibia	173	192	161;158	242	171	201	162	162	212	137		172	187	110	143;149;137;146;155	180	212		176	184	103	115	221;212;209;205	164	103;107;100;110	247
1402	Ndonga Linenea	Nyangana	Kavango	Namibia	173	195		242	171	198	165;156	162	224;206;215	122	179	160	187;184	110	164	165	197		203	181	110;113	128	215	140;149;158	107;110	271
1425	Ndonga Linenea	Nyangana	Kavango	Namibia	173	198	170	242	171		162;156	162;165	212	131	179	157	190;184	129;101	164;155	152;165	194;200;191	136;139	179;176;182	174;184;150	113	118;121	209;205	146;182;158;155;164		274;277
1426	Ndonga Linenea	Nyangana	Kavango	Namibia	173		173	258	171	198	162;159	165	215	122	182	157	187	94;91	155	168	162;197	146	176	165		134	224	158	103;100	268
1428	Ndonga Linenea	Nyangana	Kavango	Namibia	173	195	161	242	171	198	156	165	215	125	127;130		187	129	134	174	206		173	174	113	128	218	164	103;100	268
1429	Ndonga Linenea	Nyangana	Kavango	Namibia		195	176	242	171	201	159	162	221	149		157	184	120	172	155	200	139	200;167	184	116	131	218	109;170	103	265
1453	Ndonga Linenea	Nyangana	Kavango	Namibia	173	192	179	242	171	198	180	165	206	137			187	67;110	164	152	200	149	188;185	174	100	121	221	158;155	103	277
1470	Ndonga Linenea	Nyangana	Kavango	Namibia	176;173	198;189;195	167;176		171	201;198	162	162;165	224;206;218	131;119;128;125;122	170;160;157;179;182	157;160	187	98;139;129;110;91;120;101	164;155	180;177;155	203	136;139;133;146	173;152;179;176;194;170;182	147;177;171;140;153	110;125;100	121	209;205		100;97	268;274;277;262;247;253;259
1567	Karukuta C	Nyangana	Kavango	Namibia	173	198	173	258	177	201	162		212	125	179	157	187	120		177	200	146	173;179;176	184	100	128	212	164	116;119	265
1571	Karukuta C	Nyangana	Kavango	Namibia	173	202;198;195	161	258	165	201	156	162	212;218	122		172	187	110	143;146	177	200		197	174	94;136;100;97	125	215	164	113	271
1580	Nyangana DH	Nyangana	Kavango	Namibia	173	195	170	227	171	198	153	162		140	179	163	184	120	164	168	194;197	139	173	184	100	128	218	161		268
1586	Nyangana DH	Nyangana	Kavango	Namibia	176	192	161;158	242	174	198	159	165	212	125	182		187	113	164	155	159;206;209	136;139	194	168	106	128	209		113;110;116	244;247
1589	Karukuta C	Nyangana	Kavango	Namibia	176	195		242	171	201	162;165	165	209	140	179	157	184		155	165	194	143	173	177	110	128	205	170;173;167	103	238
1590	Karukuta C	Nyangana	Kavango	Namibia	173	192	167	258	171	198	162	162	221	125	179	157	187	82;110;91;120;101;116	155	168		158	176	190	110	121	215		113;110;116	271
1599	Nyangana DH	Nyangana	Kavango	Namibia	176;173	187;192		227;242	171;174	201;198	165;159	165	212;206		179;182	157;160	187	113	164;155	155	197;209	139;143	200;194	168;177	106;91	128	209	197;170;173;179;176;161	113;100	247
1626	Nyangana DH	Nyangana	Kavango	Namibia		192	176	242	171;174	198		162	212;221	125	179;182	157	187	120;101	164;155	168	194	136;143	200;191	190;187	110	121	215	161;158;164	113;100;110	271
1631	Nyangana DH	Nyangana	Kavango	Namibia	173	202	161	242	171	201	174;162	162	212	125		160	187	110	134;137;152	155	200		179;176	184	110;125;103	115	205	179	100;110	247
1637	Karukuta C	Nyangana	Kavango	Namibia	173	208	161	258	171	198	162	162	206	122		169	187	120	140;137	168	194		200	190	106	121	215	170;167	103	268
1644	Nyangana DH	Nyangana	Kavango	Namibia	176;173	198;192;204		242	171	201;198	162;165	165	206;215	128;125;122	185;179;182		187;184	110;113	164;155	171;158;152;168	197;191;212	136;139;146	173;179;176;185;182	177	94;106;113	128;115;131;125	215;212;205;218	143;152;161;158;164	103;100	268;241;247;253;265
1646	Nyangana DH	Nyangana	Kavango	Namibia	173	198;195	158	227	171	201	159	165	215	131;125	130	160;163		129;120	134;140;137		200	155	173	187	100;113	128	209;205	176;158	103;107	280;262;247;253;265
1753	Katere C	Nyangana	Kavango	Namibia	173	202	170	227	171	201		165	206	128;125;122	185	160	193	110	155	168	212	139	173;194;182;203	177	110	128		167;161;164	103	256
1816	Katere C	Nyangana	Kavango	Namibia	173	195	176	242		201	165	165	212	125	179	157	187	101	164	168	194	146	182	168	103	121	212	143	100
2033	Mabushe	Nyangana	Kavango	Namibia	173	189;192	170;173;167	227;258	171	201;198	162;156	155;162	212;206;197	128;125		160	187;184	88;98;110;120	155	152;155	218;194;197;191	130;136;139	173;179;176;191;197	168;181;184;177	110;100;116;97	118;134;121	215;209;205;230	185;167;161;164	100;110
2045	Mabushe	Nyangana	Kavango	Namibia	173	198	185	242	171	198	162;165	165	212	122			184	91	155	168	212	152	182	196;130	113	118;115	209	161	107	247
2046	Mabushe	Nyangana	Kavango	Namibia	173	198	185	242	174	201		152	215	125	182	157	184	129	155	168	212	152	206	174	113	131	218	179	103
2047	Mabushe	Nyangana	Kavango	Namibia	173	198	176		171	198	162	162	218	128	179	160	184	88	155	152	224	139	173;179;191;197;182	165	113	125	205	158	100
2052	Mabushe	Nyangana	Kavango	Namibia	173	195	158	242	171	198	165	165	206		179	157	187	110	155	165	197	136	191	181	103	140	221	143	103
2060	Mbambi East	Nyangana	Kavango	Namibia	176	189;195	167	242		201;198	162	162;165	206;209	128	170;182	157	190	129;101	155	152;155	200;203	139;146	173;152;182;203	181	94;110;103	121	215;209	149	103
2071	Mabushe	Nyangana	Kavango	Namibia	185	192		242	171	201	156	165	206	131	179	157	184	110	155	189	197	152	179	202	103	128	215	158;155	107
2084	Mbambi East	Nyangana	Kavango	Namibia	176;173	189;195	167	242		201	162	162;165	206;197	137;128	170;179;182;167	157	190;187	129	155	152;155	200;203;191	139;146	173;182	181	110;100	121;115	215;209;205		103	268;253
2092	Mabushe	Nyangana	Kavango	Namibia	173	192	170	258	171	198	165	165	206	128	179	157	184	101		152	197	136	191	184	116	128		161	103	292
2119	Mabushe	Nyangana	Kavango	Namibia	173	189	173	242	174		162	165	206	128	179	157	181	101	155	158	200	136	182	177	82;85;88;91	131	209	173	103
2163	Mbambi East	Nyangana	Kavango	Namibia	173	192		242	171	201	162	162	221	122	182	157	187	120	155	168	194	158	173	165	110		205	176	103	271
2166	Mbambi East	Nyangana	Kavango	Namibia	176	192		261	171	201	165	162	212	122	179	157	184	132;129	155	168	209	143	170	174	106	128	221	161	103
2168	Mbambi East	Nyangana	Kavango	Namibia	176;173		167	242	171	201;198	162	162;165	206;227	137;128	170;182	157	190;187	129;101	155	152;155	200;203	139;146	173;152;182;203	181	94;110;103	121	215;209;205	149;182	103
2184	Mbambi East	Nyangana	Kavango	Namibia	173	198	167;164	258		201;198	168;156	165	206	122	179	157	187;184	101	164	158;168;155	218;200	139;143	176	168;177	110;116	134;128	209;205	164	103;100
2185	Mbambi East	Nyangana	Kavango	Namibia	176;173	189;192	170;173	227	171;177	201;198	156		206;215	116;122	179;182	157	187;184	110;91	172;155	152;155	197;200	149	179;188	168;187	100;113		221	185;158	103;100	271;274
2305	Karukuta C	Nyangana	Kavango	Namibia	173	192	173	242	171	201	162	162	212	137	179	157	187	110	149;181	180	212	146	161	184	103	115			107;110	247
2334	Mabushe	Nyangana	Kavango	Namibia	173	198;192	173;167;185	242	174	198	162	162;165	212;209	146;122	179;167	157;160	184	110;113	155	168	218;212	152;139;155	173;152;170;146	171;196	136;113;97	118;128			103;107	247
2340	Mabushe	Nyangana	Kavango	Namibia	176	198	173	242		201	165	165	212	122	179	160	187	101	155	168	197	146	173;146	177	100	121	209		103	268
2351	Karukuta C	Nyangana	Kavango	Namibia	173	187	173	258	171	201;198	165	168	212	125	179	154	184	139;110;101	155	152	206	136	149;146	181	110	121			103;100	268
2362	Karukuta C	Nyangana	Kavango	Namibia	176	195	185	242	171	198		165	206	125	182	160	184	110	155	165	197	143	200;149	181;184	106	128	205		103;100	238
2478	Mabushe	Nyangana	Kavango	Namibia	176	198	167	258	171;174	201	168;156	165	224;206;215	122	179	157	184	94;98;113;116	164;155	152;165;168	197;209	139	146	174;171	110;106	121;140			103;107;100	232;235;238;256;259
565	Mabushe	Nyangana	Kavango	Namibia	176;173	189;192		242	171;174	201	168;165	165	212;206	131	179	157	187			165;168;155	194;200;206	136;146	206;179;200;185	143;168	103	115;131	218;224	167;161	107	268;271
580	Mabushe	Nyangana	Kavango	Namibia	176;173	198;189;195;192	170;173;167;161	242	171;174		168;162;165;159	162;165	212;206	131;119;128;125;122	179;182	157;160	187	88;107;110;101	164;155	177;165;168;155	218;194;197;200;206;212	130;136;139;143;146	206;173;152;179;194;185;182	174;143;168	106;113;103	118;121;128;115;131		185;167;161;158	103;107
620	Shinyungwe C	Nyangana	Kavango	Namibia	173	204		258	174	201	165	162	206	131	179	157	184	110		177	200	136	176;167;221	184	116	121	209		100;97	271;217;274
623	Shinyungwe C	Nyangana	Kavango	Namibia	173	189;195;192		242	171	201;198	162	155;162;165	206;197;215	128;125;122	179;182	157;160;154	187	110;91;101;116		168	197;203	136;143;146	176;197;182	177	110;125;100;103;116	118;134;128;137;125	199;239		103;107	271;277
624	Shinyungwe C	Nyangana	Kavango	Namibia	176;173	195;192		227;242	171	198	162	155;162;165	212;206;197	125	179	157;160;154	187;184	110;101		171;165;168	197;200;203	136;143	176;182	165;177	125;100;116;97	118;137;125	199;212;209;218;202		103;107;100	268;277
628	Nyangana DH	Nyangana	Kavango	Namibia	173	198		242	174	201	156	165	212	122	179	157	187	82;139;110;91;120		168	194	139	173	177	85;113;88	128	215		100	274
634	Nyangana DH	Nyangana	Kavango	Namibia	173	198		242	171	204	162	162	215	122	179	157	184	120;101		152	194;197	136	200	177	110	121	205	152	103;100
640	Nyangana DH	Nyangana	Kavango	Namibia	173	195;192		242	171	198	156;159	165	206;218	134;122	179	157;160	184	110;113;104		152;165;168;155	197;200;191	136;139	170	174	110	118;115	215;199;212;218		113	271
641	Shinyungwe C	Nyangana	Kavango	Namibia	176;173	208;195;192		227	171;174	198	162	155;165	212;206	128;125	179	157;154	187;184	120;104;101;116		152;165;168	197;200;203	136;139;143;146	179;176;182	165;177	100	118;121;137	199		103;107;100	268;271
642	Shinyungwe C	Nyangana	Kavango	Namibia	173	195;192		227;242	171	198	162	155;162;165	212;206;197	140;128;125	179	157;160;154	187;184	110;101;116		171;165;168	197;203	136;143;146	176;182	165;177	125;100;116	118;121;137;125	199;212;209;218;202		103;100	268;271;274;277
644	Shinyungwe C	Nyangana	Kavango	Namibia	173	198;195		242;273	174	201;198	162	162;165	206	131;125	173	160	184	139;91		152	197	139	176;188	171	110	112	205		103;107	271
645	Shinyungwe C	Nyangana	Kavango	Namibia	173	198;189;195;192		242	171	198	162	155;162;165	206;197	125	179	157;160;154	187;184	110;91;101		171;152;165;168;189	197;200;203;212	136;139;149;143;146	176;182	165;177;171	110;125;100;103;116;91	118;134;128;112;137;125	199;221;212;209;218;202		103;107;100	277
649	Nyangana DH	Nyangana	Kavango	Namibia	173	195		242	174	201;198	156	162	212	134;140	179	157	187	120		168	200;209	143	194	181;177	110	128	215;218		100;97	271
652	Nyangana DH	Nyangana	Kavango	Namibia	176;173	208;195		242	171	201	156	165	212;209	122	179	157	187	101		152	200	139	197;203	202;156	106;113	121;137	205		107;100	268;271;250
654	Nyangana DH	Nyangana	Kavango	Namibia	176;173	198;189		227;242	171	201;198	162;165	162;165	212	140;125;122	179	157;160	187	110;101		165;168	194;197;206	152;139;146	173;176;191;182	174;177	100;106;116	121;128	212;209		103;100;97	286;268;274
660	Nyangana DH	Nyangana	Kavango	Namibia	173	192		258;242	171	201;198	162	162	197	119;125	179;167	157	187	101		152;180;177;155	203;209	143	173;149;161	181;177	110;100;97	115	209;205		103;107;100	235;253
666	Mbambi East	Nyangana	Kavango	Namibia	176;173	198;195		227;242;248	171	198	162;165;159	165	233;206;227;215	134;128	170;179;167	157	187	129;110;101		152;165;155	200;203;206;209	136;139	173;185;170	174;181;171	110;113;103;116	118;134;121;131	215;209;205;218		103;107;100	268
668	Shinyungwe C	Nyangana	Kavango	Namibia	173	198		258	171	201	162	168	212;206;221;215	125	179	157;160	187;184	120		177	209	139;146	176	181	119;116	121	205		113;103;100;110	250;253
669	Shinyungwe C	Nyangana	Kavango	Namibia	173	187		227	171	201	162;165	165	206	122	179	160	187	120		168	197	143	200	177	91	128	209		100;97	280
670	Nyangana DH	Nyangana	Kavango	Namibia	170;173	192		258;242	171	198	162	162;165	212;209	134	182	160	187	101		152;177;155	197;212	152;155	173;182	190	106;91	128;131	218		107;110	286
672	Nyangana DH	Nyangana	Kavango	Namibia	173	195		258	171	198	165	165	206	134	182	160	184	91		165;162	200	139	170	177	106	125	215		103;100	268
673	Nyangana DH	Nyangana	Kavango	Namibia	173	192		258	171	198	162;156;159	165	206	128	167	160	184	101		165	162;197;200	139	185	143	110	125	205		100	271
674	Nyangana DH	Nyangana	Kavango	Namibia	173	192		242	171	201	156	165	212	122	179	160	187	101		168	197	139	182	184	116	115	209		100;97	280
677	Nyangana DH	Nyangana	Kavango	Namibia	176;173	187;198;195;192		258;242	171	201	162;156;159	162;165	212;206;215	134;131;119	179	157	187;184	107;98;110;101		165;168	221;197;200;191	130;139;149	176;185;170;182	174;184;177	110;100;113;103;116	134;121;128;115	215;212;209;218		113;103;107;100	256
683	Nyangana DH	Nyangana	Kavango	Namibia	173	198		227	174	198	162;159	168	197	122	182	160	184	101		155	162;197;200	152	191	177	103	118	209		103;107	256
686	Shinyungwe C	Nyangana	Kavango	Namibia	173	195		242	171	201;198	162	162	206;197	140;128;125;122	179;182	157;160;154	184	110;120		177;165	200;203;191	143;146	176;170;182	177	125	121;137;125	212;218		113;103;100	268;274;277
688	Shinyungwe C	Nyangana	Kavango	Namibia	173	195		242	171	198	162	162	206;197	125	179	160;154	187	110		165	203	143	176	177	82;85;125;88;91	128;137;125	212;218		103;107;100	277
689	Shinyungwe C	Nyangana	Kavango	Namibia	173	198;195;192		258;242	171	198	162;165	162;165	212;206;209	112;140;125	179;182	157;154	187	94;98;110;120;101;116		152;177;155;189	203;209;212	149	179;200;182	174;171	94;100;116;91	121;131;125	212;209;205		113;103;107;100	271;274
690	Nyangana DH	Nyangana	Kavango	Namibia	176;173	198;189;192		227	171	201	162;165;159	162;165	206	134;128	179;182	157	187	110;91;120		155	162;197;209;212	152;149;146	179;176	171	106;97	128	218		94;100;97	238;271
691	Nyangana DH	Nyangana	Kavango	Namibia	173	195;192		258	171	201	162	162	221	125	179	157	184	101		168	194;197	136;158	176	165;187	110	121	215		103;100	271
692	Nyangana DH	Nyangana	Kavango	Namibia	173	195		242	171	198	162;165	165	221	116	182	160	187	82;129		214;217	203;206	136	191	165	91	125	218		103;100	271
698	Nyangana DH	Nyangana	Kavango	Namibia	176	192		242	174	198	162	165	212;206;197;203	128;122	179	157;160	184	123;132;107;129;110;113		152	194	143	194	187	119	128;125	221;218;224		100	286;283
700	Nyangana DH	Nyangana	Kavango	Namibia	173	198;189		242;245	171	198	162;165	162	206	119	179	157	187;184	91;101		155	194;200	130;136	173;182	165	106;103	121;125	205		103;97	256
701	Nyangana DH	Nyangana	Kavango	Namibia	176	198;195		242	174	201;198	165		206	131	179;182	157	187	98;129		177;168	200	143;161	194	168;165;184	106	128;131	215	146	113;100;110;116	268;274
702	Nyangana DH	Nyangana	Kavango	Namibia	176	198;192		227;242	177;174	201	162	165	212;206	125;122	179	157	184	110;120;101		171;177;168;155;174	221;197;200;203	136;139;133	173;176;188;194;170;182	187;184	100;113;119	118;134;131;137	212;209;205		103;107;100	271;247
706	Shinyungwe C	Nyangana	Kavango	Namibia	173	195;204		258;242	171;174	201;198	162;165	162	206;197	131;125	179	157;160;154	187;184	110		177;165	200;203	136;143	176	184;177	125;106;116	121;128;137;125	212;209;218		103;100	277
730	Nyangana DH	Nyangana	Kavango	Namibia	176	192		258;242	171	198	162;165	162;165	206	134;122	179	157;160	187	110;113		171;158;168;155	197;203	139;143	173;194;182;203	165;184	100	121	212;209;218		103;100	271;277
787	Mabushe	Nyangana	Kavango	Namibia	176;173	198;189;192		227;258;242	171;174	201;198	162;165	155;162;165	212;206;215	134;143;140;131;128;125;122	173;179	157;160	187;184	110;91;120;101		152;165;168;155	194;197;200	136;139;146	206;209;173;194;185;197;215;203;146	143;168;177	110;100;106;113;103;97	134;121;128;115;131	212;209;205;218		103;107	271
788	Mabushe	Nyangana	Kavango	Namibia	173	198		227;258	174	219	162;165	162	206;218;209	128	179	157	187;184	120		168	200;203	152;146	176;170	177	110	134;140;125	215;212;218		100	271
791	Mabushe	Nyangana	Kavango	Namibia	173	189;192		258	171	198	165		206	128	182	160	187	110;101		152	218	130;136	191;197	181	97	118	230	173	103;100	292;253
792	Mabushe	Nyangana	Kavango	Namibia	176	192		273	174	204	162	165	206	122	179	157	184	113		165	162;200	149	176	181	110	125	215		103;100	271
809	Mabushe	Nyangana	Kavango	Namibia	173	198		242	171	198	156	165	212	131	179	157	184	129		165	156;194	136	182	174	113	121	209		103;100	274
832	Mabushe	Nyangana	Kavango	Namibia	173	198;192		242	171;174	201;198	162;165	152	206;203;215	140;119	182	157	187;184	110;120		152	197	143;146	179;194;170	190;184	110;106;119;103;116	134	221;209;218		103;107	271;253
854	Mabushe	Nyangana	Kavango	Namibia	173	198		258	171	198	159	165	206	128	173;179;182	157	184	129;110;91		177	203	136	164	177	113	125	205		103;107;100	253
866	Nyangana DH	Nyangana	Kavango	Namibia	173	189		242	174	219	162	162	206	140	179	154	187	129		168	197	139	179	184	125	131	224		103	271
869	Nyangana DH	Nyangana	Kavango	Namibia	173	198		242	174	201	165	152	215	125	182	157	184	129		168	212	152	206;149	174	113	131	218		103	283
870	Nyangana DH	Nyangana	Kavango	Namibia	173	198		248	171	201	162	165	215	122	182	160	184	113		177	191	143	182	165	110	125	218		103;100	247
871	Nyangana DH	Nyangana	Kavango	Namibia	179;173	198;192		242	171	204;201	162;156	162;165	212	134;125	179	160	187;184	98;101		168;155	197;200	152;143	170	181;177	113;103;97	121	215;205		103	271;262;250
873	Nyangana DH	Nyangana	Kavango	Namibia	173	198;192		258;242	171;174	201	168;165	162;165	212;206	125;122	179	160	187;184	101		165;168	194;197	143;146	173;188	184	110;100	118;121	209		103;107	268;271
874	Nyangana DH	Nyangana	Kavango	Namibia	176;173	189;195		258;242;245	171	198	162	162	212	131	182	157	187	101		152	200	139	179;194	171	110	118	215		103;100	268
876	Nyangana DH	Nyangana	Kavango	Namibia	173	192		242	171	198	162	165	209	128	179	157	187	101		168	197	143	173	165	116	131	215		107	229
877	Nyangana DH	Nyangana	Kavango	Namibia	173	192		258	171	201	162	162	221	125	179	157	184	101		168	194	158	176	187	110;106	121	215		103;100	271
885	Nyangana DH	Nyangana	Kavango	Namibia	173	198		242	171	198	162	165	206	128	182	160	187	101		189	206	146	182	181	116	121	215		97	265
888	Nyangana DH	Nyangana	Kavango	Namibia	173	192		242	171	201	156	165	212	122	179	160	187	101		168	197	139	182	184	116	115	209		100	280
889	Nyangana DH	Nyangana	Kavango	Namibia	179;176;173	192		242	171;177	201	153;162	162;165	206	128;125;122	182	157	184	110;101		177;165	194;212	136;149;143	176;191	171	94;106;103;97	121;112	215		103;107	268;271;250;253
894	Nyangana DH	Nyangana	Kavango	Namibia	173	187		227	171	198	165	165	206	122	179	160	190;187	98		152	200	143	200	181	91	128	209		103;100	271
896	Nyangana DH	Nyangana	Kavango	Namibia	173	187		248	171	201;198	162	162	212	143;125;122	185	157	187	110;113		168;155	200	149;143	179;185	177	110;106	131	205;218		103;100	256
897	Nyangana DH	Nyangana	Kavango	Namibia	176;173	198		227;242	171	201;198	162	168;162	197;209	119;122	182	157;160	184	101		168	200	152;139	206;191;185;170	184;177	100;103	118;131	209;205		103;107	256
903	Nyangana DH	Nyangana	Kavango	Namibia	173	198;189		242	171;174	201;198	162;165	162	212;206	134;128	179;182	157	187;184	110		152;165;193	203;206;212	139	173;152;179	174;177	110;113	131;125	212;218		103;100	238
904	Nyangana DH	Nyangana	Kavango	Namibia	173	198;195		258	171;174	201	162;165	162;165	212;221	128	179;182	157	187	123;98;110;101		152;180;177	224;191	146	176;182	165	110;113;103	121;131	218		103;107;110	262;250;253
905	Nyangana DH	Nyangana	Kavango	Namibia	179;176	202;198;192		242	171;177	201;198	153;162	162;165	206;209	128;125;122	179;182;167	157	184	110;101		177;165	194;212	152;136;149;143	176;191;182	174;171	113;103;97	121;112;131	215;209		103;107	271;253
908	Nyangana DH	Nyangana	Kavango	Namibia	173	192		242	174	198	162	165	212	119;122	173;179	157;160	187;184	110;113		152;155	197	136;146	173;152;170	187;171;196	94;113	118;125	221		103;107	262;247
909	Nyangana DH	Nyangana	Kavango	Namibia	173	198		227	174	198	162	168	197	122	182	160	184	101		155	200	152	191	177	103	118	209		103	256
910	Nyangana DH	Nyangana	Kavango	Namibia	173	192		258;242	171;174	204;201;198	162	162;165	212;206	119;125	179	160;154	184	94;107;98;110;91		177;168	221;212	139	191;170;203	171	110;100	118;128	205		103;107;100	238;220;217;253
911	Nyangana DH	Nyangana	Kavango	Namibia	173	195		242	174	198	162	165	206	128	179	160	187	120		168	197	149	188	187	106	137	227		107	271
913	Nyangana DH	Nyangana	Kavango	Namibia	173	195		227;242	174	198	162	168	206;197	128;122	179;182	160	187;184	120;101		155	197;200	152;149	209;188;191;170	187;177	106;103	137	227;209		107	271;256
915	Nyangana DH	Nyangana	Kavango	Namibia	173	187		227	171;174	198	165	168;165	206;197	122	179;182	160	187;184	120;101		168;155	197;200	152;143	200;191	177	88;103;91	118;128	209		100	280;262;256
916	Nyangana DH	Nyangana	Kavango	Namibia	173	192		242	174	198	162	165	212	122	179	157	184			155	197	136	170	187	113	118	221	149	107	247
917	Nyangana DH	Nyangana	Kavango	Namibia	176	198		242;273	171	201	162;159	165	212	140	179	160	184	107;113;116		168	206	139	179;188	174	94;113	134;128	205		100	271
918	Nyangana DH	Nyangana	Kavango	Namibia	176	198		242	171	201	162	165	206	131	179	157	187	139		155	194	143	182	177	113	140	215		103	268
920	Nyangana DH	Nyangana	Kavango	Namibia	176	192		242	171	201	162	165	206	122	179	160	187	110		171	203	136	194	184	113	131	212		100	262
921	Nyangana DH	Nyangana	Kavango	Namibia	176	195		227	171	198	162	155	212	128	179	154	184	120		168	197	136	176	165	100	118	209		107	268
923	Nyangana DH	Nyangana	Kavango	Namibia	173	192		242	174	201	168	162	212	125	179	157	184	120		168	206	139	173	177	106	131	218		103	265
925	Nyangana DH	Nyangana	Kavango	Namibia	173	198;195		258	171;174	201	162;165	162;165	212;221	128	179;182	157;160	187	123;98;110;101		152;177	191	139;146	176;182	165;177	110;113	121;131	218		107	262;250;253
927	Nyangana DH	Nyangana	Kavango	Namibia	176	184		242	171	201	162	165	212	125	179	160	184	101		165	206	152	179	190	110;106	115	205		103;100	253
928	Nyangana DH	Nyangana	Kavango	Namibia	173	184		242	174	198	162	165	212	125	173	160	187	67;110		152	197	146	173	196	94;110	125		155	103	262
930	Nyangana DH	Nyangana	Kavango	Namibia	173	181		242	171	201;198	162;165	162;165	212;221;215	134;140;137;131;128;125;122	179	157;160	187;184	107;110;120;101		180;165;155	218;197;191;212	136;133;146	176	165;184;177	103	115;131	215;221;209;205;218		113;103;107;110	247
931	Nyangana DH	Nyangana	Kavango	Namibia	173	198		242	171	204	162	162	215	128;122	179	157	184	120		152	197	136	200	177	110	121	215		103	271
932	Nyangana DH	Nyangana	Kavango	Namibia	185	192		242	171	201	156	165	206	131	179	157	184	110		189	197	152	179	202	103	128	215		107	256
935	Nyangana DH	Nyangana	Kavango	Namibia	173	198		258;242	174	204;201	168;162	162	224;197	116	179;182	160	187;184	110		165	209	136	173;170	174;168;165;171	110;106;97	128	215		103;100	268;256;259
939	Nyangana DH	Nyangana	Kavango	Namibia	176;173	202;198;204		227;242	171;174	201	162;159	162;165	206;209	134;125	179;167	157	187	110;101		152;165	197;206	149;143	173;197	168	100;113	118;121	199		103	265;259
942	Nyangana DH	Nyangana	Kavango	Namibia	173	189;195		227	171;174	201;198	174;159	165	212	137;128	179	157	187;184	94;98;91;101		168	194;197	139;143	191;185	171	125;113	121;128	215;205		103	268;271
946	Nyangana DH	Nyangana	Kavango	Namibia	173	204		227	171	198	162	165	215	125	179	157	187	91		155;162	200	139	176;188	177	110	121	215		103	268
1123	Nyangana DH	Nyangana	Kavango	Namibia		195	170	242		198	156	165	215	125;122	160;182	157	187	129	164	174	203;206	133	173;170	174	113	128	218		103;100	268;265
1132	Nyangana DH	Nyangana	Kavango	Namibia	173		161;164	242	171	201;198	159	165		134;131	157;167	157;154	184	107;91;101	155	152	159;194;197	136;133	173;176;170	168	113	128	199		103;100	265
1133	Karukuta C	Nyangana	Kavango	Namibia		195;192	170	258		201;198	162;165	162	233	119;125;122	157;179	160	187	82;139;129;110;91;120;101	164;137	155	197;191	136;143;146	173;170	181	113;103	118;121	221;212;209		100;97	271;274
1139	Katere C	Nyangana	Kavango	Namibia	173	187	170	227	171	201	165	165	206	122	179	160	187	82;110;120;101;116	155	168	197	143	200;197	177	94;88;91	128				280;277
1143	Katere C	Nyangana	Kavango	Namibia	173		170;167	242	179;174	198	162	165		125	157;179	154	187	82;107;110;91;101;79	164	165	203;206	136;139	179;176;182	184	106	128;125	209		103;107;100	268
1150	Katere C	Nyangana	Kavango	Namibia	173		173;167;179	227;258;242	171	201;198	162;165;156			140;122	173;179	157;160	187	110;113;104;101	164;155	152;165;155	224;200;203	130;136;139	173;176;194;197	174;190;181	110	134;128	215;212;218	170;167;152;161;164	103	268;271
1175	Katere C	Nyangana	Kavango	Namibia	173	187	170	227		201	165	165	206		179	160	187		155	168	197	143	200	177	88;91	128	209	197	100;97	280
1194	Katere C	Nyangana	Kavango	Namibia	176	189	161	245		201	165	162	218	125	179		184	113	140;137	152	200	155	173		100;106	131	212;205	173;167	103;97	283
1230	Shinyungwe C	Nyangana	Kavango	Namibia	173		173;182	227	171;174		162;159	165	212	128;125	179	160	184	110;120	155	177	162;197;200;191	133;146	173;194;170	165;187;181;177	113;103;116	121;131	215;205;218	170;167;161;164		268;250;256
1231	Shinyungwe C	Nyangana	Kavango	Namibia	176		176	227	174		165	165	215	125	182	160	184	120	155	152	200	139	179	205;196	100	134		124;164	107	271
1251	Shinyungwe C	Nyangana	Kavango	Namibia	176		173;179	242	171	204;201	162	168;165		125;122	179	160	187	110;120		171;177;165;183	162;203;209	136;146	176;188;191;194;182	181;184	106	121;131	212;209;205	179;176;161;158	103;100	262;250;247;265
1272	Shinyungwe C	Nyangana	Kavango	Namibia	173	202	179	242	171	198	156	165	206;209	149;146	179;154	154	184	98	172	168	215	143	167	171	100;97	128;131				286;283
1279	Shinyungwe C	Nyangana	Kavango	Namibia	176;173	198	170	227	174	198	159		206	134;137			187	123;94;132;129;104;85	155	165	206	149	179	184	110	134	221	158	107;100	268
1285	Shinyungwe C	Nyangana	Kavango	Namibia	176;173	189;195	170;176	242	171		162	165	206	122		157	184	101	155	152	200	139;133;149	182	174;171	100;106;103	125	209	164		271;253
1387	Ndonga Linenea	Nyangana	Kavango	Namibia	173		167	273	171	198	162;159			125	179	157	184	139	155	168	194	136	173;170	190	110	121	218	167;161;164	103;100	274
1409	Ndonga Linenea	Nyangana	Kavango	Namibia	176;173		170;173	242	171		165	165		119;122	160;179	157;160	184	98;91;101	155	168	194;197;165	146	173;170	177	100;97	121;128	209	158	103;107;100	268;265
1455	Ndonga Linenea	Nyangana	Kavango	Namibia	173	192	182	258		198	162	165	206	125	179	157		101		171	200	143;146	182	177	116	137	199	170;167;164	100	271
1565	Nyangana DH	Nyangana	Kavango	Namibia	173	198;195;192	173;161;164		165;171	201;198	156	165	206;215	131;122	179	157		101	155	152;165	197;200;203	136;143	173;179;176;170		113;97;91	134;125	221;209;205	161	103	247
1570	Karukuta C	Nyangana	Kavango	Namibia		195	176	258	174	219	162;156		209	128;125;122		157	187	82;129;110	155	177	218	136	173	184	100	131	218	152	113;103;107;100	271;274
1584	Nyangana DH	Nyangana	Kavango	Namibia	173	198	167	227	171		162	162			179	160	187	120	155	152	191	136	173;176	181	110;106;103	115	205	170;173;167	103	271
1593	Karukuta C	Nyangana	Kavango	Namibia			170;158	227	165;171	201;198	156;159	162		125;122	167	157;160	187;184	110;91	164;155	177;155	197;200	146	191;197;170	174;181;177;171	110;97	125	215;212;209	170;167;158;164	113;107	271
1606	Nyangana DH	Nyangana	Kavango	Namibia	173	195	173	242	171	198	165		221	116	160;182	160	187	129	164	217	165;203;206	136	191	165	91	121;125	218	173;167
1620	Karukuta C	Nyangana	Kavango	Namibia	173		176;161	227	171		162	162;165	218	128	179	154	184	88;110;91	164;155	152	224;200	139;146	173;182	165;150	113	125	205	158;155		268;271;250
1629	Nyangana DH	Nyangana	Kavango	Namibia	173		176	258	174	219	162;159	165		128;125	157;179	157;154	187	126;82;129;110;91;120;101	155	177	215;162;221;218	136;133	173;170	184	100	131	218		103;100	274
1633	Karukuta C	Nyangana	Kavango	Namibia	173		173	258	174	201	162	165		125	179	157	187	120	155	177	200	146	176;167	184		128	212	161;164	122;116;119	265
1635	Karukuta C	Nyangana	Kavango	Namibia			173	242	174	219	162		209	131	179	157	184	101	155	168	197	139	173;176	177	116	131	218	161;164	100	271
2042	Mbambi East	Nyangana	Kavango	Namibia	173		170;173;161	258		201;198	162;156	162;165	212;197	128;125;122	179;167	157;160	184	110;120;101	164;155	152;168	203;191	152;133;143	173;179;200;194	184;171	110;100;106;103	121;115;131	215;209;205;218		103;100;110	247
2072	Mabushe	Nyangana	Kavango	Namibia	173	198;192	167;161	242	174	204;201;198	168;162	162;165	206	128	182	157		110;101	155	152;180;165;155	194;212	139;149;146	173;152;179;200	168;177	110;113;103	131;125	212;224	167;161;158;164
2074	Mabushe	Nyangana	Kavango	Namibia	173	198;192		227;242;236		198	162	162	218;215	131;128	179	157	184	88;110;120;104	155	152;162	224;194	136;139	173;194;182	165	110;113	134;125	209;205		100	271
2080	Mabushe	Nyangana	Kavango	Namibia	173	204	167	227		198	156	152	212	143	179	157		88;98	164	152;180	191	152;139	173;179	174;165	113	128;125	205	170	103
2083	Mbambi East	Nyangana	Kavango	Namibia	176;173	195;192	167;164	242	174	201;198	162;165	162;165	206;197	128		160	187	126;129;110;113;120	155	152;165;168;155	197;200;203	152;139;146	173;194	168	110;103;116	121;128	209	170;149;158
2116	Mabushe	Nyangana	Kavango	Namibia		198	185	242	171	198		165	212	122	179	157	184	113	155	168		152	182	196	113	118	209	161	107	247
2178	Mabushe	Nyangana	Kavango	Namibia	176;173	198;195;192	170;167	258;242	171;174		168;162;159	162;165	206;197;215	137;131;128;125;122			184	98;110;120;101	164;172;155	152;165;168;155	197;200;206	139;146	173;176;188	174;184;177	106	121;128;125	221;212;218	140;170;173;167;161;158;155;164	97	268;271
2343	Mabushe	Nyangana	Kavango	Namibia	173		167	242	171	201	165	162	212	128	182	157	184	98	155	168	200	136	152	184	110	118	218		100;97
2513	Nyangana DH	Nyangana	Kavango	Namibia	173	192	167	258	171	198	162	162	215	149	179	157	184	110	155	155	197	143	176	181	116	134			103;100
70	Katere C	Nyangana	Kavango	Namibia	176;173		170;173	227	171	201;198	162;165;156	165		128;122	179	157;160	187;184	139;91;120		168;155	197;212	149;146	179;188;191;185;170;182;203	174;168;177;171		121;128	221;218	185;161;155	103	268;271
314	Karukuta C	Nyangana	Kavango	Namibia	173	192		273	171		168	165	206	131	179	157	184	110	155		218	136	173	165	106	121	218	170;173		247
556	Mabushe	Nyangana	Kavango	Namibia	176;173	189;195;192	170;173;167	242	171	198	162;165	165	212	119;122	179;182	157;160			164;155	177;165;168	218;197;206	130;136;143;146	173;152	174;143;168;150	106;103	121;128;115	209		103;107;100
626	Nyangana DH	Nyangana	Kavango	Namibia	176	195		227	171	198	162	155	212	128	179	154	184	120		168	197	136	176	165	100	118	199;209		103;107;100
627	Nyangana DH	Nyangana	Kavango	Namibia	176;173	202;195		227;258	171;174	201;198	168;162	155;165	212;206	128;125	179;182	157;154	187;184	107;110;113;120;101;116		168	197;200	136;143	176;191	193;165	100;113	118;134	215;212;209;218		103;107;100
629	Nyangana DH	Nyangana	Kavango	Namibia		198;195		258	171;174	201	162;165	162	212;221	128	179;182	157;160	187	123;98;101		152;177	224;191	139;146	176;182	165	110	121;131	218		107	250
630	Nyangana DH	Nyangana	Kavango	Namibia	176;173	198;189;192		227;242	171;177	201;198	162;156	162;165	212;206;215	134;116;128;122	179;182	157;160	187;184	110;91;120		152;165;155	197;200;212	149;143;146	179;176;188;170	168;171	110;100;106;113;103;97	134;128	221;218		103;100;97
631	Nyangana DH	Nyangana	Kavango	Namibia	164	189		242	174	201	162	165	206	122	182	157	184	120		168	197	143	173	177	119	121			103;100	247
635	Nyangana DH	Nyangana	Kavango	Namibia	176;173	195		258;242	171	198	162;156	165	206;215	119;125	179	157	187;184	110;101		177;165;168	200;203	139;143	173;188;200	174;165;177	110;85;125;106;88;91	134;125	205		103;107;100
637	Nyangana DH	Nyangana	Kavango	Namibia	173	198;189		242	174	201	156	165	212	122	179	157	187	139;110		165;168	194;197	152;139	173	174;177	113;116	121;128	215;212;209		100
638	Nyangana DH	Nyangana	Kavango	Namibia		192		273	171	198	162	162	221	125	179	157	184	139		168	194	136	173	190	110	121	218		103;100	274
639	Nyangana DH	Nyangana	Kavango	Namibia	173	192		242	174	198	162	165	212	122	179	157	184	110;113		155	197	136	170	165;187	113	118	221			247
643	Shinyungwe C	Nyangana	Kavango	Namibia	173	189;195		242	171	201;198	162	162	206	125	179;182	157	187	91		168;155	197	136;143	176	171	110;103	118;134;125	221			271
646	Shinyungwe C	Nyangana	Kavango	Namibia	176;173	195;192		258		201	162	168;165	212;221	125	179	157;160	187	120;101		177	197;200;209	146	176	165;181	100;116	118;121	199;205		107;100	250
650	Nyangana DH	Nyangana	Kavango	Namibia	173	198		248	174	201	159	165	206	134	182	160	187	101		168	159;197	133	185	171	113	125	205			253
651	Nyangana DH	Nyangana	Kavango	Namibia	173	198		227	171	198	162	162	218	128	179	160	184	88		152	224;221;227	139	173	165	113	125			100;97	271
653	Nyangana DH	Nyangana	Kavango	Namibia	179	195		242	171	201;198	168	162	215	128	182	157;160	184	98		155	197	152;149	173;182	177	116	134	218		100
657	Nyangana DH	Nyangana	Kavango	Namibia	176;173	189;192		227;258;242;248;233	177	201;198	162;156	162;165	212;206;215	116;122	179;182	157;160	187;184	110;91;120		152;165;168;155	197;212	149;143;146	179;176;188	168;171	110;100;106;113;103;97	134;128	218		100
658	Nyangana DH	Nyangana	Kavango	Namibia	176;173	195		227	174	198	162	162	206	122	179;167	157;160	184	110;113;104;101		152;168	197;200	139;143	173	174;177	110;100	121;125			103	271
662	Nyangana DH	Nyangana	Kavango	Namibia	173	198		258	171	198	162;165	162	212;206	140;122	179	157;154	187			152;189	212	149	179;200;182;203	174	100;91	121;125	212		113;103;100	271;253
665	Shinyungwe C	Nyangana	Kavango	Namibia		195		227;242	171	198	159	162;165	206	128	167	157	187	110		155	209	136	170	174	110;113	118;125	199		110	295
671	Nyangana DH	Nyangana	Kavango	Namibia	173	195		258	171	198	156	165	212	143	179	163	184	120		168	194	149	179	190	113	131	212		94;97
675	Nyangana DH	Nyangana	Kavango	Namibia	173	187;192		242	171;174		162;159	165	206	134;122	179;182	157;160	184	110;113;104		168	200	139;149	185;170	174;177	94;110;103	121;128	215		103;100	253
676	Nyangana DH	Nyangana	Kavango	Namibia	176;173	187;198;192		242	171		162	162;165	206;197;218;209	119	179;182	157	184	104;101		168	200	139;149	185;170	174;184;177	110;100;103	128;131	215;205		103;107	271;253
679	Nyangana DH	Nyangana	Kavango	Namibia	173	189		242	171	198	153;165	165	215	125	182	157	187	98		180	191	143	173	174	113	121	215		103;97
680	Nyangana DH	Nyangana	Kavango	Namibia	173	192		242	174	201	162;159	162	221	131	179	157	187	129		177	162;191	136	188	184	113	128	215		94;97
687	Shinyungwe C	Nyangana	Kavango	Namibia	173	192		242	171	201	162	162	221	128	179;182	157;154	187	110;120		177	191	146	170	165	110		218		113;110;116	268
694	Nyangana DH	Nyangana	Kavango	Namibia	173	189		242	174	201	162	162	206	125	179	157	187	82;129;120		168	212	146	173	174	110;106	134	218		103;100
696	Nyangana DH	Nyangana	Kavango	Namibia	176;173	198;195;192		242;248	171;174	201;198	162	155;165		128;122	179;182	157;160	184	123;132;113;120		152;177	197;191	136;143;146	173;194;182	165;187	110;119	128;125	221;209;218		103;100	247;265
715	Karukuta C	Nyangana	Kavango	Namibia	173	208	161	258		198	162;156	162;165	206	122		169	187	120	140;137	168	194			190	106;113	134;121	215	170	103;100	268
837	Mabushe	Nyangana	Kavango	Namibia	173	189;192		258;242		201;198	162	162	212	131	179;182	157	184;193	139;91		152	197;200	149;143	179;176	193	103;97	134	212;224		110	274
838	Mabushe	Nyangana	Kavango	Namibia	173	198		227	171	198	162	162	218	128	179	160	184	88		152	224;221;227;200	139	173	165	113	125		146		268;271
855	Mabushe	Nyangana	Kavango	Namibia	173	195;192		242	171	201	180;162		197;209	143;119	182	160		107;110		165	224	136;139	188;185	168;187	110;100;88	121;112	215;221;209	155	107;110	238;241
865	Nyangana DH	Nyangana	Kavango	Namibia	173	187		227	171	201	165	165	206	122	179	160	187	120		168	197	143	200;224;146	177	88;91	128	209		100
872	Nyangana DH	Nyangana	Kavango	Namibia	173	198		242	174	201	156	162	212	134	179	160	184			155	200	152	170	205	97	125	215		103;100	262
878	Nyangana DH	Nyangana	Kavango	Namibia	176;173	198;189;192		227;242	171;177	201;198	162;156	165	212;206;215	134;116;128;122	179;182	157	187;184	110;91;120		152;165;168;155	197;200;203;212	149;143;146	179;176;188	168;171	100;106;113;103;97	134;128	221;218		103;100;97
879	Nyangana DH	Nyangana	Kavango	Namibia	173	192			174	201	162	162	221	131	179	157	187	82;129;120		177	191	136	188	184	113	128	215		97	268
881	Nyangana DH	Nyangana	Kavango	Namibia	176	184		242	171	201	162	165	212	125	179	160	184			165	206	152	179	190	110;106	115	205		103	253
884	Nyangana DH	Nyangana	Kavango	Namibia	173	195		258	174	219	162	165	209	128	179	157	187	82;129		177	218	136	173	184	100	131	218		103
890	Nyangana DH	Nyangana	Kavango	Namibia	173	198;189		242	171;174	201;198	162;165	162	206	134;128;125	179;182	157	187;184	110;101		165;193	203	139	173;152;179		110;113	131;125	212;218		103;100	235;238
892	Nyangana DH	Nyangana	Kavango	Namibia	173	187		227	171	201	165	165	206	122	179	160	187	120		168	197	143	200		88;91	128	209		100;97	280
893	Nyangana DH	Nyangana	Kavango	Namibia	173	198			171	201	162	165	215	122	182	160	184	113		177	191	143	182	165	110	125	218		103;100	247
901	Nyangana DH	Nyangana	Kavango	Namibia	173	192		258	174	198	162	165	206	125	179	160	187	107;104		152	197	158	200		106	125	212		100	247
914	Nyangana DH	Nyangana	Kavango	Namibia	176	198			171	201	162	165	212	122	182	160	187	110		168	200	143	170	184	106	131	221		100	241
919	Nyangana DH	Nyangana	Kavango	Namibia	173	189			171	201	162	162	221	125	179	157	187	82;129		155	218	143	191	165	110	125	218		110	247
922	Nyangana DH	Nyangana	Kavango	Namibia	173			242	171	201	159	162	221	137;149	179		184	120		155	200	139	200	184	116	131	218	158	103;97	265
924	Nyangana DH	Nyangana	Kavango	Namibia	176;173	195		227	171;174	201;198	162;159	162	206;215	125	167	157	187;184	91		155	197	146	173;170	177	110;116	134;125	209			271;241
929	Nyangana DH	Nyangana	Kavango	Namibia	173	189		258;242	171	201;198	162;165	162;165	221;230	125;122	179	157;160	187	98;101		152;165;168;155	218;191	133;143	179;176;188;191	174;165	110;113;122;119	121;131;125	209		113;107;110
934	Nyangana DH	Nyangana	Kavango	Namibia	173	192		242	171	201	156	162	212	128	182	160	187	110		155	203	146	173	174	110	121	209			262
936	Nyangana DH	Nyangana	Kavango	Namibia	173	189			171;174	198	162	165	212	116;128;122	179	175	187	101		171	200	139	173;176;170	177	91	128;115	218		103	256;259
943	Nyangana DH	Nyangana	Kavango	Namibia	173	202		258	174	201	168	165	206	125	182	157		110		168	200	143	191	193	113	134	218		103	271
1124	Nyangana DH	Nyangana	Kavango	Namibia	176;173		170;176	227;242	171		162	165	206	122		157;163	184	101;116	164;155	152	200;206	133;149	179;182	174;171	110;100;103	125	209	170;167;161;164		271;265
1125	Katere C	Nyangana	Kavango	Namibia	173	195	176	242	171		165		212	125	179	157	187	101	164	168	194	146	179;182	168	103	121		143		286
1189	Katere C	Nyangana	Kavango	Namibia	173	189	161	242		198	165	165	230	128			184	113	149;146;152	165	218		197	171	122	121	218	149	103;107;100	262
1196	Katere C	Nyangana	Kavango	Namibia		192	164	242	171	201	156		212	122	179	160	187;193	98;101	155	168	197	136;139	179;182	184	116	115		149;176		280
1200	Karukuta C	Nyangana	Kavango	Namibia		189;195	161	242	171	201	165		215	125		166;163	184	101	134;137;146	155	200;191		182	165;187	110	134;128	218	170;173;176	103;100	250
1206	Shinyungwe C	Nyangana	Kavango	Namibia	179;173	187;198;195	167;176;161;179;164;191	227;242	171;174	201;198	162;156	162;165	212;197;218;215	137;131;122			187;184	123;88;94;107;98;110;113;91;120;104;101;85	164;155	152;177;165;168	224;194;197;200;203;191		173;152;176;185;197;182	168;165;184;177;220	94;110;113;97	121;140;128;125	212;205		103;107;100	232;268;289;271;274;280;277;250;259
1227	Shinyungwe C	Nyangana	Kavango	Namibia	173		167;164	242	182;171	201	162;159			134;137;128	170;157	157;154	190	98;129;91	155	155	162;200;203	139;146	173;152;179;185;182;203	181	110;103	118;121	209		103	268;253
1228	Shinyungwe C	Nyangana	Kavango	Namibia	173	192	161;164	258;242	171		162;159	162;165	212;206	116		154	187;184	107;101;116	155	152;165;168;155	197;203	136;139;158	176;182	181;171	110;113;103	134;121;128			100	280;253
1252	Shinyungwe C	Nyangana	Kavango	Namibia	176;173	198;189	170;173	242;245	171	201	162;165;159		212;221;218;209	112;125		157		110;113;120;104;101	164;155	152;177;168;155	197;200;209	139;146	173;176	168;181;184;177;171	110;106;116	121;128;131	215;212;205;202		103;110;97	283;271;250;253
1388	Ndonga Linenea	Nyangana	Kavango	Namibia			176;179	242	174	201			206	131;125	185	157;160	187;184	129;110;120	164;155	165	194	136;143	173;179;176	162	100	115	215	179;164	103	292;268;271;250;253
1597	Karukuta C	Nyangana	Kavango	Namibia	173		173	258	165;196		156	162		122	160;182	157;160	187	110	164	177	156;200	143;146	194;197	174	136	121;125	215		113;110	271
1598	Karukuta C	Nyangana	Kavango	Namibia	176	195	185	258	171	198	162	165	209	125			184	110;101	164;155	165			173;176	184	110;106	128	205	176	103;107	235;238;241;250;253;256
1814	Katere C	Nyangana	Kavango	Namibia	173	192	167;164	258		201	162	162	215	122	179		187	110;101	152;155	171;168	200	130		171	100;91	128;115	205	173;176;101;158;164	103;110
2049	Mabushe	Nyangana	Kavango	Namibia	173	192	158	258		201	162;165	165	206	131	182		184		155	168	200	152;139	173;182	184	97	131;125		158;155	107;100	253
2094	Mabushe	Nyangana	Kavango	Namibia		198	167	245	171	201		165	215	128	179	157	187	101	155	171		136	194	165	103	134	218	143	103
2103	Mabushe	Nyangana	Kavango	Namibia	173		173	242	171	201	165	165		125	182	157	187	123;88;110;120;101	164	152	215	143	173		113	131	218	164	103
2112	Mbambi East	Nyangana	Kavango	Namibia	173		170;164	242	171	201	162;165	162;165		116;122	179	157;160	187	107;98;110;113;104;101	164;155	152;168	197;200	152;136;146		171	94;106	134;121;128	209;205	170;152;176;161;158	103;107
2124	Mbambi East	Nyangana	Kavango	Namibia		189	170			201	165	165	218	125		157	184	113	164;161	168	197	139	173	168;177;140;217	106	121	212	173	97	283
2145	Mbambi East	Nyangana	Kavango	Namibia	173		164	242	174	201	165	165	197	128	179	160		110	155	168	197	152		168	116	128	209	158	100
2164	Mbambi East	Nyangana	Kavango	Namibia	173		167;185	242		201;198	165;156	165	206;197	128	179;182	157;160	184	110		168	197;200	143;146	173;194;197	168;171	110;116	121;140;128	215;212;209	109;152	103;100
2206	Mbambi East	Nyangana	Kavango	Namibia	173	195	167		174	198	156	165	212	128	179	157	187	101	155	152	203	133	182		116	118		121;158	103
2208	Mbambi East	Nyangana	Kavango	Namibia	176;173		167	242		201	162	162;165		137;128	170;182	157	190	129;101	155	152;155	200;203	139;146	173;152;182	181	94;110;103	121	215;209	149	103
2304	Mabushe	Nyangana	Kavango	Namibia	173		158;185	242		198	162	162;165	212	131;122	179;167	157;160;154	184	123;110;113	155	152;168	197;212	152;136;146	146	171;196	113	118			103;107	247
2307	Karukuta C	Nyangana	Kavango	Namibia	176;173		158	258;242	171	198	162;156	171	206	140;128	182	160;154	187	110;101	155	152;168	197;200	146	152;167	165;171	110;136	140;125			103
2324	Karukuta C	Nyangana	Kavango	Namibia	173	198	167	248		201	159	165	206	134;125	182	160	187	101	155	168	197	133		171	113	125	205		103
2345	Mabushe	Nyangana	Kavango	Namibia	173		167	227;242	171	198	162	162;165		125;122	179;182	157;160	187;184	110;101	164;155	152;165;168;155	197;191	136;139;149	149;146	174;190;181;171	106;122	121;115			103;107;100	292;268;238;271;250;253
19	Karukuta C	Nyangana	Kavango	Namibia	176;173	195		242		201	156	162	212	140	179	157	187	120		165;168	200;209	143		181	110;106;113	128	215;209		100	271
25	Nyangana DH	Nyangana	Kavango	Namibia	173	198		227		198	162	162	218	128	179	160	184	88		152;149	224;221;227	139		165;162	110;113;116	125	205		100;97	271
34	Nyangana DH	Nyangana	Kavango	Namibia	179;176	192		273		201;198	162;165	162;165	212;206	131;122	179;182	157;160	184	120;101		177;174	197;212	139;143		181;171	110;106;103	128;137	209		103;107	268;283;265
41	Nyangana DH	Nyangana	Kavango	Namibia	176;173	198;192		242;273		201	162;165	162;165	212;206	131;122	179;182	157;160	184	110;113;120;104;101		180;177;193;155;189	197;212	136;139;143		187;171	100;106;103;97;91	118;128;137;125	215;221;209		113;107	250
46	Karukuta C	Nyangana	Kavango	Namibia	173	198		242		201	162	165	212	131	182	157	190;184	110		168	206	139		184;177	106	131	205		103;100	283
47	Nyangana DH	Nyangana	Kavango	Namibia	173	192		227;258		204	165;159	165	206	122	179	157	187;184	110		168;155	203	139		171	100	118;131	221		103;107	217;253
54	Karukuta C	Nyangana	Kavango	Namibia	173	202;195		258;242		201	162;165	152;162	200;209	137;122	179	157;160	187;184	132;98		168	194;212	152;146		174;177	113;119	112;131	221;209		103;107	268
566	Mabushe	Nyangana	Kavango	Namibia	173	198;195			171	201	162;159	162;165	212;206	125	179;182	157		101	155	152;165	200;212	136;149	173;164;200;191		110;113	118;137	218		103;110	265
632	Nyangana DH	Nyangana	Kavango	Namibia	173	187		242	171	201;198	162;165	165	206	122	179	157;160		101		168	197	143	173;158		100;103	128	209		103;100	268
636	Nyangana DH	Nyangana	Kavango	Namibia		192		258	171	198	162	165	206	125	179	157	187			171	200	146	182	177	116	137	199		100;97	271
647	Nyangana DH	Nyangana	Kavango	Namibia	176;173	192		258;242	171	198	162;159	155;165	212;206	125;122	179	157;154		101		171;168	197;200;203	136;143	176;182	165;177;171	113	118;137;125			107;100	262
659	Nyangana DH	Nyangana	Kavango	Namibia	176	198		258	174	198	162	165	206	122	179	160	187	107;110		155	200;203	152	176	177	103	131	205
664	Shinyungwe C	Nyangana	Kavango	Namibia	173	192		258	174	226	168	162	206	125	179	157	184	101			194	143	188	184		118	209		103;107;110	271
667	Shinyungwe C	Nyangana	Kavango	Namibia	173			227;242	171	204;201	162;165	162		131;128;125	179;182	157	187;184	107;110;120;116		168	197;191	152;146	173;179;188;170	165;184	88;91	121;140;125	215;209;218		113;103;100;97	235;238;241;274
678	Nyangana DH	Nyangana	Kavango	Namibia	173	192		242	171		165	162	206	122	179	160	187	107;113;116		165	197	143	179	168;165	122	121			103;107;100	265
682	Nyangana DH	Nyangana	Kavango	Namibia	176;173	189;192		227;242;248	177	201;198	162;156	165	212;206;215;209	134;116;128;122	179;182	157	187	110;91;120		152;165;168	197;200;203;212	149;143;146	179;188	168;171	110;100;106;113;97	128;131			100;97
684	Nyangana DH	Nyangana	Kavango	Namibia		192		242	171	201		165	206	122	179	160	187	110		171	203	136	194	184	113	131	212		103	262
695	Nyangana DH	Nyangana	Kavango	Namibia	173			242	171	201	165	162		122	179	160	187	107;113;116		165	197	143	179	168;165	122	121	205		100	265
705	Shinyungwe C	Nyangana	Kavango	Namibia	176	198		258	171	219;198	162		206;221	134;122	182	157	187;184	101		165;168	215;197	143	200	181;177	110;106		205;218		103;107;100	268
815	Mabushe	Nyangana	Kavango	Namibia		198		227	171	198	162	162	218	128	179	160		88		152	224	139	173	165;184	113	125	205		100	271
831	Mabushe	Nyangana	Kavango	Namibia	173	198		242		198	162	165	212	122	179	157	184	113		168	209;212	152		196	113	118	209		107	247
859	Mabushe	Nyangana	Kavango	Namibia	173	202;198;195;192		227;258	171	201;198	162;165;156	162;165	206;218	131;122	185;179	157;163	187;184	107;110;113;116			200;209	139;143	179;191;170	137;171		121;128;125	215;218		103;107	268;250;265
875	Nyangana DH	Nyangana	Kavango	Namibia	173	198		242	171	204	162	162	215	128;122	179	157	184	120		152	197	136	200;197	181;177	110	121	215;205
882	Nyangana DH	Nyangana	Kavango	Namibia	176			242	171	201	165	165	212	122	179	160	187	101		168	197	146	173	177	100;97	121	209		103
891	Nyangana DH	Nyangana	Kavango	Namibia	173			258	174	226	162	165	206	122	179	157	187	113		155	206	139	200		91	128	224		103	274
898	Nyangana DH	Nyangana	Kavango	Namibia	173	181		227	171	198	162;165		212	125	179	157	187;184	110;91;101		180;177;165	206;212	139	173;176;191	137;190	106;103		218		103;107	274
941	Nyangana DH	Nyangana	Kavango	Namibia	173	189			174	198	162	165	206	128	179	157	181	101		158	200	136	182		82;94;85;100;106;103;91	131	209		103	268
944	Nyangana DH	Nyangana	Kavango	Namibia	173	192		242	174	198	162	165	206	140	182	160	184	113		152	200	139	185	177	103		212			271
1117	Katere C	Nyangana	Kavango	Namibia	176;173	195		227;242	171;174	204;198	162;156	165	212;206;215	131;125				129	164;155	152;168;155;174;162	197;203;206	130;136;133	173;170	174	106;113;97	134;128;131	209;218		113;103	268;256
1148	Nyangana DH	Nyangana	Kavango	Namibia	176;173			242;233	171;174		168;162	165	206	122	185;179	160;154	184	110;104	155	171	197;203;206	136;133;143	194;185;197;182;203	143;168;184;177	113	128;131;125		173;167;179;149;176;161;158		244;271;262
1173	Katere C	Nyangana	Kavango	Namibia	173	198	176;179	242		201	162;165	165	212;215		160;167	160	184	123;91;120;101	155	155	165;203;206;209	139	179	174	103		218		103;107;100
1421	Ndonga Linenea	Nyangana	Kavango	Namibia	173		170	242	171	201;198	162;165;156		206;215;209	125	179;182		187;184	129;110;91;120;101	164;155	165;168;174	197;200;206	136;139;133	173;164;179;176;170	174;165;177	113;103	121;128;115		161;158;164		268;271;250;253
1594	Karukuta C	Nyangana	Kavango	Namibia	173	198				201	156	165	206	128		160	184	110		155	159	143	176	190	110	121	218	161	103	247
1604	Nyangana DH	Nyangana	Kavango	Namibia	173	198	167	248	171;174	201		165	206	122		160		101		168		133	185;182	147	113;88	125;146	205	158	103	253
1612	Karukuta C	Nyangana	Kavango	Namibia	173	208	170	258	171		162	162	206	122	179	160			172	168	194	139	200	190	106	121		170		268
1790	Katere C	Nyangana	Kavango	Namibia	173	192	167	227		201	162	162	197	128	167	157		94	152;155	165	200		185	162	103	128	218		103
1793	Katere C	Nyangana	Kavango	Namibia	173	189	167	258		198	162	165	212		179	178	187	101	152;155	171	200		176	177	91	115	218		103
2079	Mabushe	Nyangana	Kavango	Namibia	173	198		227			162	162	218		179	160	184	88	155	152	224	139	173	165	113	125	205	158;155	100
2091	Mabushe	Nyangana	Kavango	Namibia	173	198	176	227			162	162			179	160	184	88	155	152	224	139	173	165	113	125	205	158;155	100
2121	Nyangana DH	Nyangana	Kavango	Namibia		202;204	161	242	171	201	165		212	125	179	160		101		155		136	200	181	113	118;112	218	109;179	103	277
2313	Nyangana DH	Nyangana	Kavango	Namibia	173		170	258	171	201	162	165		119	185	157;160	184	104	155	168	200	136;143	158	165		134			103;107;100	274
2363	Karukuta C	Nyangana	Kavango	Namibia	176;173	195	170;167;185	258;242		201;198	162	165;174	206	128;125;122			184	101	164;155	165;168	194;197	136;139;149;143	149;146	174;165;184;177	94;106;119	121;115			103;107;100;110	247;253
2367	Mabushe	Nyangana	Kavango	Namibia	176;173	198;189;192	170;173;167;176	227;242				162;165	212;206	128;125;122	179;182;167	157;154	187;184	94;98;110;101	164;155	158;165;168;155	194;200;203	152;136;149;143	149;146	174;168;171	94;100;106;113	121;128;125			103;107;100	235;268;238;250;247;253
2474	Mbambi East	Nyangana	Kavango	Namibia		189	173	242	171	198		165	206	140		154	184	129	172	165		136	164;161	181	106	125	212		103;100	271
2496	Nyangana DH	Nyangana	Kavango	Namibia	176;173	192	161	242		198	159	165	212	128	182	157	187	113	164	155	197;209	139		168	110;106		209		113;110;116
2542	Nyangana DH	Nyangana	Kavango	Namibia	173	192		258		201	156	165	206	128	179	160	184	120		165;168	215	136		168;171	110;106;113;116	128	212		103	271
2546	Nyangana DH	Nyangana	Kavango	Namibia	164	189		242		201	162	165	206	122	182	157	184	120		168	197	143		177	119	121	221		103;100	247
2584	Karukuta C	Nyangana	Kavango	Namibia	173	198		242		198	162	162;165	206	131;125	179	157	184	120;101		189;149;162	212	149;146		174;181	91	118;128	215		103	262;250;247;265
37	Nyangana DH	Nyangana	Kavango	Namibia	176;173			227;242		201;198	162;156	171;162;165	212;206	134;140;128;122	179;182	157;160;154	187;184	110;120;101		152;180;177;165;168;155;149	200;206	139;146		174;171	110;136;106;113;103;97	140;131;125	215;212;209		113;103;100	280
53	Karukuta C	Nyangana	Kavango	Namibia	173	198;195		258;242		201	162	165	212;206;221;215	122	179	154	184	116		165	197;200	139		181;184	100		209		103;107	268;241;250;259
633	Nyangana DH	Nyangana	Kavango	Namibia		181		227	171		162	162	212	140;125	179	157	187	101		177	206	139	191	190	103	128	221;218;224		103;100
656	Nyangana DH	Nyangana	Kavango	Namibia	173	189		242	171		162	165	212	134;137;125;122	179	157	187	110		165	197	152	176;182	174	116	121	212
663	Nyangana DH	Nyangana	Kavango	Namibia	173			227			162	162	218	128	179	160	184	88		152	224	139	173	165	113	125	205		100	271
681	Nyangana DH	Nyangana	Kavango	Namibia	176;173	198;189;192		227;242;248	171;177	201	162;156	165	212;206;215	116;122	179;182	157	187;184	110;91;120		152;165;168;155	197;200;212	149;143;146	179;176;188	168;171	110;100;106;103;97	134;128
693	Nyangana DH	Nyangana	Kavango	Namibia	176;173			227;258;242	171;174	201;198	168;162;165	155;165		125;122	179	157;160;154	187;184	110;91;120;101		152;155	194;197;200	152;139;146	173;179;194;182	168;184	106;103;116	134;121;128;131	209;205;218		103;107
697	Nyangana DH	Nyangana	Kavango	Namibia	176			242	174		162	165	212;206;197;215	122	179;182	157;160	184	123;132;107;113		152	197	143	194	187	119	128;125	221;218;224		100
704	Nyangana DH	Nyangana	Kavango	Namibia		198		242	171	198		162	206	119	179	160	187	126;129		168		139	173	177	113	128	221		107;110	274
709	Shinyungwe C	Nyangana	Kavango	Namibia		192	164		171	198	162		197	140	182	154		110	155	165	197	139	173		106	121;125	212	161;158;164	103
808	Mabushe	Nyangana	Kavango	Namibia	173	198		258	171	198	159	165	206	128	182	157	184			177	159;203	136	164	177	113	121;125				253
868	Nyangana DH	Nyangana	Kavango	Namibia	173	198		242;248	171	204;201;198	162		215	128;122	179			120		152	197	136	200;197		110	121	215;205	152	103	271
899	Nyangana DH	Nyangana	Kavango	Namibia	173	189;195			171		162	165	206;215		179	160	184	110;120		171;158;168	209;212	143;146	194;203	177	110;106	134;128	205		103	268;271;253
1144	Katere C	Nyangana	Kavango	Namibia	173			227	171	201	162;165	162;165		119;122	160;179	160;163	187			168	194;197;165	139;143	200;197;203	177	88;91	128	209		100;97	280
1209	Shinyungwe C	Nyangana	Kavango	Namibia	176		173	227	171	198	162			134	179	157	187	110		165	162;203	139	176	168			218	161	103;100	265
1258	Shinyungwe C	Nyangana	Kavango	Namibia			170	227	171	201				122	179	160	187	120	155	168	197	143	200;197;203	177	91	128	209	197;161		280
1274	Shinyungwe C	Nyangana	Kavango	Namibia		198;192		242	171;174		162		206		173;179	160	184	110;120	155	152	197;203;206	136;139;133	188;200;194;182	184;177	110;106;113	112;131	212;209	173;176;182;161;155;164		268;271;262;250;253;265
1405	Ndonga Linenea	Nyangana	Kavango	Namibia	173		164	227	171	198	162;156			128;125	179	157	187;184	101		152;168	197	136;139	173;164;179;176;188;191;194;170	177;171		121	209		103	235;268;238;271
1767	Katere C	Nyangana	Kavango	Namibia	176	198	170;173;164			201;198	168;165;156;159			140;128;125	173;179;167		187;184	123;110;120	164;152;155	152;165;168;155	197;200;203	136;146	173;179	137;165;181;184;177;171	110;100;113;103;116	128;131	199;212;218	170;173;167;161	103;107;110;97
1768	Katere C	Nyangana	Kavango	Namibia	173	198	176	227		198	162		218	128	179		184	88	152;155	152	224		173	165	113;91		205	158	100
2341	Karukuta C	Nyangana	Kavango	Namibia	176;173		173;158	258;242		198	162	171;162	206	140;128;122	182	160;154	187	110;101	155	152;168	197;200	146		165;171	110	140			103;100
2523	Mabushe	Nyangana	Kavango	Namibia		195;192	170;167	258;242	171	198		162	212;215	149;125;122			184	67;129;110	164;155	168		136;139;143	176;191;149;146	181;171	100;113;119;116	118;134;121;128		98	103;107	232;235;271;247;253;265
2531	Mabushe	Nyangana	Kavango	Namibia		189	167	242	171	201;198		162;165	206;215	128;122			187;184	101	146;155	177;165			152;200;158;146	174;181;171	110;106;103	134;128;137	215;209	143;149	107;100	283;289;271;274;277;265;259
2558	Nyangana DH	Nyangana	Kavango	Namibia	173	198		242			162	165	212	122	179	157	184	98		165;162	206	152		181	100;103;97	125	205		100;97	268;271
43	Karukuta C	Nyangana	Kavango	Namibia	176;173	198;195		258		201	162	165	215	122	179	154	184	116			200	139		181;177		121	209;205		103;107;100	268
69	Nyangana DH	Nyangana	Kavango	Namibia	179;176	192		227		201;198	162;156	165	206		182	157;160	184	91		152;165;155	194;212	149;143;146		168;171	94;97	128;112;131	221		107;100
625	Nyangana DH	Nyangana	Kavango	Namibia	176;173	195;192		227;258;242	171		162		212;206	128;125	179	157;160	187;184	110;101		171;165	197;200;203	136;143;146	176;182	165;177	125;116;97		199		103;107;100
655	Nyangana DH	Nyangana	Kavango	Namibia	173	192		227			162	162		128	182	157	187	101		165;168	200;212	136;139	176;167	187;177	110;106;113;116	125	215;205		107;110
685	Shinyungwe C	Nyangana	Kavango	Namibia	173	192			171;174	198	162;159	165	206;197	140	179	160;154		110;101		152;165	197	139	173;182		106;113	121;125	212			280
727	Nyangana DH	Nyangana	Kavango	Namibia	179			242	171		165	165		122	179	160	187	98			197	143	173	177		128	209	146	103	271
814	Mabushe	Nyangana	Kavango	Namibia		192		273		219;201	165	165	212	119	179;182	157	187	139;110;120		168;155	218	143;146	170	184	116	121				244;247
883	Nyangana DH	Nyangana	Kavango	Namibia	173	198		242		201	165	152	215	125		157	184	129		168		152	206	174	113	131	218		103
907	Nyangana DH	Nyangana	Kavango	Namibia	173	198			174	198	162	168	197	122	182	160		101		155	200	152	191;146		103	118	209			256
940	Nyangana DH	Nyangana	Kavango	Namibia		202;198;189		227;242	171	201	162;159		212;206	134;137	167	157		94;110;101		152;165	194;197;206	149;143	173;197		100;113	118;121;128	199		103	265;259
945	Nyangana DH	Nyangana	Kavango	Namibia	173	198		258			162;165	162	212;206	140;128	179		187	120		152;189	212	149		174	100;91	121;125	212		113;103	271;253
967	Nyangana DH	Nyangana	Kavango	Namibia	173	192		258	171	201	162	162	221	125	179	157	184			168	194	158	149	187	110	121
1012	Nyangana DH	Nyangana	Kavango	Namibia	173			242			162	165	212	122	179	157	184	113			212	152	182	196		118	209	149	107	247
1029	Nyangana DH	Nyangana	Kavango	Namibia	173	181		242			174	165	212	125		160	187	110			200	136	200	184		115	205	167	100	247
1186	Katere C	Nyangana	Kavango	Namibia	173	195	167	258		201	156		206		179	157;160		110	172	189	197;212	149		202	103	134	205		103
1276	Shinyungwe C	Nyangana	Kavango	Namibia	176;173			258;242				165	212;206;197;215	116;122	173;179;182;167	157	187	88;107;98;110;113;91;120;101	164;155	152		130;136;139;143;146		143;140	110;128;106;91	121;128;125	215	109;167	103;100;97	265
1381	Ndonga Linenea	Nyangana	Kavango	Namibia	173	202		258	174	201	168	165	206		182			110	164	168	200	143	191	193	113	134;131			107
2329	Ndonga Linenea	Nyangana	Kavango	Namibia	176;173	189	170	242		201	162		206	128	170	157	190;187	132;104	158	155	203	139;146			110;103	121			103
2467	Karukuta C	Nyangana	Kavango	Namibia		198	173	258		201;198		165	212	134;137;122		157	187	101	155	165		143;146		181	100	115	221		107;110	268;265
2497	Mabushe	Nyangana	Kavango	Namibia		198	176	227	171;156	198		162	218	128			184	88	155	152			152;149	165	113	125	205		100	271
2522	Nyangana DH	Nyangana	Kavango	Namibia		187	170	227	171	201		165	206	122			187	120	155	168			152;146	177	91	128	209		100;97	280
2535	Ndonga Linenea	Nyangana	Kavango	Namibia		189	167	242	171	201		165	206	128		157	190;187	129;101	155			146	152;146	181		121	209		103	268;271;250;253
9	Karukuta C	Nyangana	Kavango	Namibia	173	195		242		198	162;165	165	215		185	157				189	206	133		181;177	106	128;125	218		103;107;100	268;271;253
24	Karukuta C	Nyangana	Kavango	Namibia	176			258;242		198	162;156	162		125;122	179		187	110;120		177;189	197;200;212	136;149;143		174	91	128	215		113;103;107	241;253;265;256
858	Mabushe	Nyangana	Kavango	Namibia		198		242	174	201		152	215	125	182	157	184	129				152	206	174		131	218		103;100	283
947	Nyangana DH	Nyangana	Kavango	Namibia		192			171	198	162		221	125	185	157		101		168	194	161	179		110	121	215		103	268
951	Nyangana DH	Nyangana	Kavango	Namibia	176	195		242	174	219	162	165	212	128	182	157	184			177	218	143		184	103	131
955	Nyangana DH	Nyangana	Kavango	Namibia	176;173	202;198		227;242	171;174	201	162;159	162;165	206;209	134;125	179;167	151;157	187;184			152;165	197;206	149;143		168;181	100	118;121
958	Nyangana DH	Nyangana	Kavango	Namibia	173	198		242	171	204	162	162	215	122	179	157	184			152	197	136		177	110	121
959	Nyangana DH	Nyangana	Kavango	Namibia	173	181		242	171	201	162	162	212	137	179	157	187			180	212	146		184	103	115
968	Nyangana DH	Nyangana	Kavango	Namibia	173	192		242	171	201	156	165	215	134	182	157	184			152	200	143		174	113	140
971	Nyangana DH	Nyangana	Kavango	Namibia	173	198		227	174	198	162	168	197	122	182	160	184			155	200	152		177	103	118
972	Nyangana DH	Nyangana	Kavango	Namibia	173	192		258	171	198	162	162	209	134	182	160	187			177	212	152		190	106	131
986	Nyangana DH	Nyangana	Kavango	Namibia	173			227;258;242			162	165	206;215	125;122		157;154	184	107;110;120;101;116			200	136;139	173;200	187;181		121	209;205	158	107	268
989	Nyangana DH	Nyangana	Kavango	Namibia	173	181		227			162	162	212	125		157	184	101			206	139	191	190		128	218	161	107
991	Nyangana DH	Nyangana	Kavango	Namibia	173	181		227			162	162	212	140		157	187	101			206	139	191	190		128	224	112;161	103
992	Nyangana DH	Nyangana	Kavango	Namibia	173			236			162	165	212	125		160	184	120			200	143	182	184		128	209	140	107	253
994	Nyangana DH	Nyangana	Kavango	Namibia	173			227			162	168	197	122		160	184	101			200	152	191	177		118	209	179	103	256
999	Nyangana DH	Nyangana	Kavango	Namibia	176			242			162	165	212	128		157	184	110			218	143	176	184		131	218	143	103	256
1001	Nyangana DH	Nyangana	Kavango	Namibia	173			227			162	165	215	125;122		157	187	110;120			200	149;143	191	193;168		121;115	227;212;209	155	103	268
1008	Nyangana DH	Nyangana	Kavango	Namibia	173			242			165	165	206	128;125		157	187	120			212	139	173	181		128	218	146	103	265
1018	Nyangana DH	Nyangana	Kavango	Namibia	173			261			165	168	212	134		160	187	129			215	136	176	171		125	218	152	103	268
1022	Nyangana DH	Nyangana	Kavango	Namibia	173	181		258			165	165	212	125		157	184	110			209	146	176	165		115	221;218	146		247
1025	Nyangana DH	Nyangana	Kavango	Namibia	173			242			162	162	215	122		157	187	110			206	133	194	184		128	215	152	97	271
1037	Nyangana DH	Nyangana	Kavango	Namibia	173			242			156	162	212	134		160	184	104;101			200	152	170	205;171		125	215	188	103	262
1038	Nyangana DH	Nyangana	Kavango	Namibia	173	181		242			162	162	212			157	187	110			212	146	176	184		115	221	152	110	247
1142	Katere C	Nyangana	Kavango	Namibia			161		171	201	174		188	122	179	169		120	143;140		162;165	155	200	187			209	197;161	100;97	280
2311	Karukuta C	Nyangana	Kavango	Namibia	173		167	242		198	162	165		122	179	157	187	110;101	164;155	155	191	139		181	103				100
2463	Karukuta C	Nyangana	Kavango	Namibia		198	167	227	171	198		162		125		160	187	120	155			136	149	181		115	205		103	271
2490	Karukuta C	Nyangana	Kavango	Namibia		187	170;185	242	171	201		165	206	125			187	98	155	165;168			149	165	100	128	209;205		100;97
2491	Mabushe	Nyangana	Kavango	Namibia		189	164	230;261;227		204;201;198		162	197;215	134;128;125;122			184	110;101	146;155	152;168			152;149	184;171	100;113;103	134	215		103;107;100;110	283;271;280;250;253
2511	Ndonga Linenea	Nyangana	Kavango	Namibia		195	167	242	171			165	206				187	129	155	155			152	181	110	121	209	149	103	268
2519	Ndonga Linenea	Nyangana	Kavango	Namibia		189;195	167;164	242		201		165	206	128;125		157	187	129;120;101	155			136;139;146		181		121	209	149	103	268
2527	Karukuta C	Nyangana	Kavango	Namibia		208	170	258	171	198		162	206	122				120	172	168			200;146	190	106;88	121	215		103	268
2533	Karukuta C	Nyangana	Kavango	Namibia		202;195;192	158	227;242	171;174	201;198		162;165	206;215	125;122				91;101	155	152;155			149;158;146	177	110;116	134;125	209;205		103;107	235;271;241;253;259
2554	Nyangana DH	Nyangana	Kavango	Namibia	173	198		273		201	162	165	206		173	160	184	139			197	139		171		112	205		103;107;110	271
2574	Nyangana DH	Nyangana	Kavango	Namibia	173	202		227		198	162	165	218		179	163	187	107;113;116		152;149	200	139			110;106	128	215;212		103;107;100
2576	Karukuta C	Nyangana	Kavango	Namibia		195;192		227;258	171	198		165	206	128	179	157		98;101		165		139	173;152;185	143		128;125	205		103;100	268;265
17	Nyangana DH	Nyangana	Kavango	Namibia		192		242		198		165	212	122	179	157	184	113				136		187	113	118	221		103;107	268;247
32	Mabushe	Nyangana	Kavango	Namibia		198		227		201;198		162	218	128		160		88;107;129;110;113		152;165;189		136;139;133	173	174;165;171		125	205	146	103;100	271
50	Karukuta C	Nyangana	Kavango	Namibia		198		242		198		162	212	134;137;128;125		157		94;91		152		139	173	143	100	131		146	103	238
65	Nyangana DH	Nyangana	Kavango	Namibia		198;195		242		219;198		165	212;206	131;125		157	187;184	76;129;104;101		152;165		136		174	113	121;137	209;218		103;100	274;280;277;262;247;265;259
621	Nyangana DH	Nyangana	Kavango	Namibia	173			227;242	171		162;156	165		125	182	160	187	126;129			203;206	133	173	174		128	218		103;100
622	Nyangana DH	Nyangana	Kavango	Namibia	173			227			162	162		128	179	160	184	88		152	224;197	139	173	165		125	205		103;100;97
699	Nyangana DH	Nyangana	Kavango	Namibia		195;192		258	171	198	168;165	162;165	206	125			184	91		165	194;200		188;170	177	82;110;85;106	118;125			107;100;110
712	Nyangana DH	Nyangana	Kavango	Namibia	173	195		227	171		162		215	125	179	157	187	120		152	200	149	191		103		227
949	Nyangana DH	Nyangana	Kavango	Namibia	176;173	192		258;242	171	201;198	162;165	162;165	206	128;125;122	179;182	157;160	187;184			152;177;155	197;203;191	136;143;146		190;181;177		121;140
961	Nyangana DH	Nyangana	Kavango	Namibia	173	202		242	171	201	162	162	212	116	179	157	187			152	200	146		177;171	125
975	Nyangana DH	Nyangana	Kavango	Namibia	173	198		242	171	198	156	165	209	122	182	157	184			168	191	143		137	110
981	Nyangana DH	Nyangana	Kavango	Namibia	173	189		242	171	198	165	165		128	179	160	184			165	218	152		171	122	128
984	Nyangana DH	Nyangana	Kavango	Namibia	173			242			162	162	215	122		157	184	120			197	136	200	177		121	205	152	103
985	Nyangana DH	Nyangana	Kavango	Namibia	173			258			162	162	221	125		157	187	120			194	158	176	190		121	215	146	113
987	Nyangana DH	Nyangana	Kavango	Namibia	173			227;242			162	162;165	206	137		154	184	113;116			203;212	139;149	179;191	193;177		125	199;205	146;170	103
988	Nyangana DH	Nyangana	Kavango	Namibia	176			242	171		165	165	215	128		157		101			212	143	182	174		134	215	149		268
993	Nyangana DH	Nyangana	Kavango	Namibia	176			242			165	165	212	122		160	187	101			197	146	173	177		121	209		103	268
996	Nyangana DH	Nyangana	Kavango	Namibia	173			258;248			162;156	152;165	212;221	143		157;163		129;120			194;200	133;149	179;182	171		121;131	212	136	103;97	253
1002	Nyangana DH	Nyangana	Kavango	Namibia	173			258			162	165	215	122		154	184	116			200	139	200	181		121	209	158	103
1005	Nyangana DH	Nyangana	Kavango	Namibia	173			242			162	165	206	131		160	181				203	136	179	168		121	209	146	103	265
1011	Nyangana DH	Nyangana	Kavango	Namibia	173			248			162	165	215	122		160		113			191	143	182	165		125	218	179	103	247
1016	Nyangana DH	Nyangana	Kavango	Namibia	173			258			168	165	206	125		157	187	110			200	143	191	193		134	218	146	103
1017	Nyangana DH	Nyangana	Kavango	Namibia	173			261;258			168;165	168;162	212;206	134;125		157;160	187;184	129;101			215;194	136;143	176;188	184;171		118;125	209;218	143;152	103;107
1021	Nyangana DH	Nyangana	Kavango	Namibia	173			242			156	165	206	122		157	184	120			200	143	173	181		128	209	143	107
1024	Nyangana DH	Nyangana	Kavango	Namibia	176			227			162	165	212	122		157	187	120			212	139	182	196		128	215	152	103
1026	Nyangana DH	Nyangana	Kavango	Namibia	173			242			156	165		134		157	184	107			200	143	188	174		140	218	143	107	271
1030	Nyangana DH	Nyangana	Kavango	Namibia	179;173			242;248			162	165	215	134;125		157	187	110;101			200	143	173;197	168		121;140	212;205	161	103;107
1034	Nyangana DH	Nyangana	Kavango	Namibia	173			242			162	165	212	122		157	184	113			197	136	170	187		118	221	149	107
1035	Nyangana DH	Nyangana	Kavango	Namibia	173			227;258			162	165	215	125		157	187	91;101			197;200	139	176;188	177		121	215	146	103
1040	Nyangana DH	Nyangana	Kavango	Namibia	173			242			165	165	212	122		160	187	120			197	143	173	177		121	209	146	103
2509	Nyangana DH	Nyangana	Kavango	Namibia			167;164		171	201;198		162;165		134		157		67;110	155	152		136;143	158		113;116	128	199	155	103	247;265
2537	Nyangana DH	Nyangana	Kavango	Namibia	173	189		258			162;165	165	206				187	91		165;162	200	139		177	106;103	121	215		103;100	268
2583	Karukuta C	Nyangana	Kavango	Namibia	173	198		258		201	162	165	206;215	122	179	154	184				200	139		168;165;181;177		121;131	209		103;107;100
57	Nyangana DH	Nyangana	Kavango	Namibia		198;195		242		219;198			212;206	131;125	179;182	157	187;184	132;129;104;101		152;165		136		174	113		209;218		103;100	280;262;247;265;259
60	Nyangana DH	Nyangana	Kavango	Namibia	173	198		248			159			134		160	187	101		165;168	197	133		171	110;85;113;88;116	125	205		107;100
648	Nyangana DH	Nyangana	Kavango	Namibia	173	198		248		198	162	162	215	128				120		152	197		197	181	110	121			103
721	Nyangana DH	Nyangana	Kavango	Namibia	173			242			156	165	212	122		160	187	101			197	139	182	184		115	209		100
933	Nyangana DH	Nyangana	Kavango	Namibia		195			171	204	162			128;122	179	157;160		120			209	136	173	171	110	121;128			103	271
948	Nyangana DH	Nyangana	Kavango	Namibia	173	195;192		258	171		162;165	162;165		125;122	179	157;160	187			155	197;203;191	136;146		181;177	103	121
956	Nyangana DH	Nyangana	Kavango	Namibia	173	198		242	171	204	162	162		122	179	157	184			152	197	136		177		121
962	Nyangana DH	Nyangana	Kavango	Namibia	173	198		227	171;174	198	162	168		122	182	157;160	184			155	200	152;139		177	103
965	Nyangana DH	Nyangana	Kavango	Namibia	176;173	198;195		258	171	201	162	165		122	179	154	184			165	200	139		181	100
973	Nyangana DH	Nyangana	Kavango	Namibia	173	198;195		258	171	201	156	165	206	131;128	179;182	157	184				197	139;149		202		134;125
974	Nyangana DH	Nyangana	Kavango	Namibia	173	195		242	174	198	162		212	125;122	179	160	187			152	197	133		171	106
976	Nyangana DH	Nyangana	Kavango	Namibia	179	192		258	177	201	162;159	165		122	182	157	184			165	194	143		171		121;112
982	Nyangana DH	Nyangana	Kavango	Namibia	173			227			162	168	197	122		160	184				200	152	191	177		118	209		103	256
983	Nyangana DH	Nyangana	Kavango	Namibia	173			242			159	162	221	149		157		120			200	139	200	184		131	218	158	103
990	Nyangana DH	Nyangana	Kavango	Namibia	176			242			162		206	131;128		160	187	113			206	143	179	168			215	152	100	250
997	Nyangana DH	Nyangana	Kavango	Namibia	173			242			168;165	165		122		160	184	110			197	136	170	187		131	221	140		241
998	Nyangana DH	Nyangana	Kavango	Namibia	173			227			162	165	215	125		157	187				200	149	191	193		115	227	155	103
1000	Nyangana DH	Nyangana	Kavango	Namibia	176			227;242			162	165	206	122		160		101			200;206	139	188;191	184		118;128	221;209	146	97
1003	Nyangana DH	Nyangana	Kavango	Namibia	173			258			162	165	209	128		157	187	129			218	136	173	184		131	218	140
1007	Nyangana DH	Nyangana	Kavango	Namibia	173			258			162;165	162		125		157;160	187	139			197;203;191	136	173	177		121	212;205	164	103;100
1009	Nyangana DH	Nyangana	Kavango	Namibia	173			258			162	165		128;125		157	187	129			218	136	173	184		131	218	140	103
1010	Nyangana DH	Nyangana	Kavango	Namibia	173			227;242			165	165	206	143;128		157;160		94;101			194;197;200	136;149;146	179;200	137;187;140		121;131	215;205	146		238
1013	Nyangana DH	Nyangana	Kavango	Namibia	179			242			165	165	206	122		160	184	98			197	143	173	177		128	209	146
1015	Nyangana DH	Nyangana	Kavango	Namibia	173			242			162	165	206	122		157		120			194	152;139	176	168		128	218		103	277
1019	Nyangana DH	Nyangana	Kavango	Namibia				242			165	165	209	122		160	187	101			203	139	209	174		146	205	136;109	103
1020	Nyangana DH	Nyangana	Kavango	Namibia	176			258;273			162	165	206	122		160	187;184				197;209	130;143	179;203	181;177		128	205	149	103
1023	Nyangana DH	Nyangana	Kavango	Namibia	176			258			156	165	212	137;125		157	187	101			197	146	176	181		115	221	146
1028	Nyangana DH	Nyangana	Kavango	Namibia	173			242			162	165	209	128;125		157		101			197	143	173	165		131	215	167		229
1031	Nyangana DH	Nyangana	Kavango	Namibia	173			245			156	165	197	128		157	187	120			191	143	194	177		121	221	158
1032	Nyangana DH	Nyangana	Kavango	Namibia	173			258			168	165	206	125		157	187	110			200	143	191			134	218	146	103
1033	Nyangana DH	Nyangana	Kavango	Namibia	173			242			165	165	206;221	125;122		157	187	129			218;200	139	191	165;171		125	218		110
1039	Nyangana DH	Nyangana	Kavango	Namibia	173			227			162	162	218	128		160		88			224	139	173	165		125	205	146	100
1136	Karukuta C	Nyangana	Kavango	Namibia			170		171	201	174		200	125	179	157		82;91;120	155		156	136	173	184				158		253
1210	Shinyungwe C	Nyangana	Kavango	Namibia			191		171	201	174		194	122	182	157		120	155		162	152	176	187				182		277
2486	Karukuta C	Nyangana	Kavango	Namibia			173	242	171	201		165		122			187	101	155	168			146	177	100	121		143		268
2517	Mabushe	Nyangana	Kavango	Namibia		195	167	227;258	174	226			206	122			187	110;113;101	164;155				203;146	184		128	199;224		103;107	274
2526	Mabushe	Nyangana	Kavango	Namibia		192		258		198		162	215	149				110	155	155		143		181	113;116	134	205		103	247
2566	Mabushe	Nyangana	Kavango	Namibia		181		227;242	171;174	201		152;162;165	206;215	140;119;122		157		129;110;120		168		139;149		174;171		134;115	221;212;209	155	107
661	Nyangana DH	Nyangana	Kavango	Namibia	176	192		258;242	171		168		212	125;122				101			194	143;146	173;176	184;177	110	118;121				271
718	Nyangana DH	Nyangana	Kavango	Namibia	176		173	242	171			165						129;120	164	152;165	203	136		205;165		118;125	218	158	103;107
731	Nyangana DH	Nyangana	Kavango	Namibia	176	202;189		245	171;174	201	165;159	165		134;125	179;167	157	184			152	200;206	139		181;177
950	Nyangana DH	Nyangana	Kavango	Namibia	173	192		242	174		165	165		122	182	160	184			155	197	136		187		131
957	Nyangana DH	Nyangana	Kavango	Namibia	173	195		273	171		162	165	197	128		160	178			168	218	143		174	100
960	Nyangana DH	Nyangana	Kavango	Namibia	176	198		242	171		165	165	206	122		160	187			168	197	146		177		118
964	Nyangana DH	Nyangana	Kavango	Namibia	173	198;189;192		242	171	198	162;165	162	212	125		157	184			165;193	203	139		177
966	Nyangana DH	Nyangana	Kavango	Namibia	173	195		258	174	219	162	165		128;125;122	179	157	187			177	218;197	136		184
969	Nyangana DH	Nyangana	Kavango	Namibia		195		227	171		159	162	206	125	167	157	184			155	197	146		177	110
977	Nyangana DH	Nyangana	Kavango	Namibia	173	198;192		248	171	198	162	162		122	179	157	184			152	197	136		177
978	Nyangana DH	Nyangana	Kavango	Namibia		195		258	171	201		165	215	122	179	157				155	197	133		184	97	128
979	Nyangana DH	Nyangana	Kavango	Namibia	176	195		242		219	162	165	212		182	157	184			177	218	143		184	103
980	Nyangana DH	Nyangana	Kavango	Namibia	173	195		227	171		162	165		125	179	157	187			152	200	149		193	103
995	Nyangana DH	Nyangana	Kavango	Namibia	179;173			258;242			162;165;156			143		157;160	184	98;129			194;200	133;149;143;161	179;176;194;182	165;171		131	215;212	136;146		268
1004	Nyangana DH	Nyangana	Kavango	Namibia	173			258;248			162;156	152;165		143		157;163		129;120			194;200	139;133;149	179;182	190;171		121;131	212	136;149		253
1006	Nyangana DH	Nyangana	Kavango	Namibia	173			245			165		212	134		157;160		113;120			203	143	188	181		121	227	167;149	103;100
1014	Nyangana DH	Nyangana	Kavango	Namibia	173			242			165	165	212	122		160		110			197	133;149	170	187		131	221	140
1027	Nyangana DH	Nyangana	Kavango	Namibia	176			242			162	165	206	125		160		129			200	139	182	184		112	212	164
1036	Nyangana DH	Nyangana	Kavango	Namibia	173			258			165	165	206	125		157		101			194;200	143	176	177		118;121	215;209	143
1576	Karukuta C	Nyangana	Kavango	Namibia			167	258;242	174	201;198	156			128;122	182			120	155		203	133;149				121;128;125		158;155	103	265
2301	Mabushe	Nyangana	Kavango	Namibia			167;179		171;174	198	174		194	122	182	160		110	164;155		180;165	136;149	146	187;184						241;262
2549	Mabushe	Nyangana	Kavango	Namibia	173	192		258			162	165			179		187	98		155;186	206	158		177		125			103;100	274
536	Mashare C	Rundu	Kavango	Namibia	182;176;173	189;195;192	173;167	227;242	171;174	201;198	168;162;165;159	165	212;221;215	137;119;128;125;122	179;182	157;160	187;184;178	110;113;104;101	164;181;155	158;152;177;165;168;155	218;197;200;212	130;136;143	155;173;152;176;200;197	174;181;177;171	110;106;113;119;103;91	134;121;128;131;125	209	185;170;173;176;161;158;155	103;100	271
537	Mashare C	Rundu	Kavango	Namibia	176;173	189;192	173;167	227;242	171;174	201;198	168;165;159	165	212;221	140;137;128;125;122	179	157;160	184;178	110;101	164;181;137;155	152;177;165	197	136;143	173;176	177;171	110;103	128	209	173;161;155	103	268;271
538	Mashare C	Rundu	Kavango	Namibia	173	195	170	242	171	201	159	152	206	119	179	157	187	110;113	164	168	197	136	185;182	171	106	137	209	146	107	265
539	Mashare C	Rundu	Kavango	Namibia	173	189;192	167	227	171	198	168;165	165	206	122	179	157	187	110;120;101	164;155	152	197;200	136;143	173;194;215	171	113;91	128	221	161;155	103	256
540	Mashare C	Rundu	Kavango	Namibia	182;176;173	198;189;192	173;167;176	227;258;242	171;177	198	162;165;159	162;165;174	212;206;221;218;215	128;125;122	179;182	157	187;184;178	88;129;110;91;104;101	164;155	158;152;177;155	218;197;203;212	130;136;139;143	155;173;152;164;176;200;194	174;165;181;184;177;171	110;113;119;103;91	134;121;128;115;125	215;209;205	185;170;173;167;152;176;161;158;155;164	103;100	268;271;274;250;253
582	Mashare C	Rundu	Kavango	Namibia	173	189;195	173	242	171	198	162;165	162	206;221	140	179	157	187	110;113	164;172	180;155	206;212	139;143;127	173	137	106;91	128;115;131	205;224	194;173;167;161;155	103	274
583	Mashare C	Rundu	Kavango	Namibia	173	189	170;167	245	171	201	162	162;165	215	134;122	179	157;160	187;184	110;113;120	164	168;155	200	127	185	184	100;91	134	221	161	103	265
584	Mashare C	Rundu	Kavango	Namibia	182	198;189	170;167	227	174	201	168;165	165	212;206;215	131;119;128;122	179;182	154	187;184	113;101	155	152;155;217	197;206	136;143	179;212;188;200;191;197;182;203	137	106;113;122;91	118;134;121;125	215	170;167;164	97	268;271;241
585	Mashare C	Rundu	Kavango	Namibia	173	195	173	258	171	198	162	155	224	137	179	157	187	110	164	165	209	139	176	177	116;91	131	205	161	103	271
586	Mashare C	Rundu	Kavango	Namibia	173	189;195	167	258;242	174	226	162;156	165	206	122	179	157	187	113;101	164;155	155	206	139;143	179;200	174;184	91	128;115;131;125	209;205;224	155	103	274
587	Mashare C	Rundu	Kavango	Namibia	173	189;195	170;179	242	171;174	198	165;156	165	206;230	122	185;179	157	187	101	155	152;189	197;200	139;143	200	174;171	106;122	115;131	209;205	167	103	271
606	Mashare C	Rundu	Kavango	Namibia	173	187;189;195	167	258	171	198	168	165	212;206;221;215	122	179	157	187	110	164	152	200	139	200	171	91	121	224	158	103	241
607	Mashare C	Rundu	Kavango	Namibia	173	187;189;195	170;167	258;242	171	198	168;165;156	155;165	212;206;221;215	122	179	157	187;184	107;110;101	164;155	152;177	197;200;203	139;149	179;176;200	174;171	110;106;91	121;115;131	215;209;205;224	167;161;158	103	241
610	Mashare C	Rundu	Kavango	Namibia	173	187;189;195	167;176	242	171	201;198	165;159	162;165	212;206;221;215	149;119;128;122	179	157	184	110;120;101	164;172;155	152;155	200	139;149	179;200	184	116;91	121;131;125	218	170;167;161;158	103	265
724	Rundu DH	Rundu	Kavango	Namibia	176	202	176	242	171	201	171	162	209	134	179	157	187	110	155	165	209	136	200	174	94	112;146	218	185;182	103	271
726	Mashare C	Rundu	Kavango	Namibia	173	195	173	242	174	201;198	162	162;165	206;197	116;137	179;182	157;160;163	187	94;110;104;101	155	152;165	212	146	176;182	143;181;177	110;106	128;125	215;209	167;149;161;158;164	103;107	271;277;259
733	Ndama C	Rundu	Kavango	Namibia	173	198;189;192	170;173;167	242	171	198	162	162	212;215	131;119;128;122	157;179	157	187	94;82;98;101	164;155	155	162;191	136;139	173;176;170	181	110;100;103	134;128;115;131	209;205;218	173	103;107;100	268;271;274
1201	Mashare C	Rundu	Kavango	Namibia	173	198	173;176	227	171	198	162;159	162	218	128	179	160	184	88	155	152	224;162;221;227;194	139	173;170	165	113	125	205	161;158;155	100	232;268;271
1202	Mashare C	Rundu	Kavango	Namibia	176;173	198;195	176	227;242	171	201;198	162	162;165	212;218;215	134;128	182	157;160	184	123;88;107;110;91;101	164;155	152;168;155	197;191	139	173;176;194;197	159;165;171	100;113;103	131;125	215;205;218	167;161;158;155;164	94	292;268;289;271;295;250;253
1220	Mashare C	Rundu	Kavango	Namibia	176;173	187;198;195	167;176	227;242	171;174	201;198	162	162;165	212;218	134;131;128;122	179;182	157	187;184	126;88;107;98;120;101;116	164;155	152;168;155	197	152;139	173;179;176;197	168;165;177	113;119	128;125	205;224	136;161;158;155	103;107;100	232;229
1221	Mashare C	Rundu	Kavango	Namibia	173	187;198;189	161	227	171;174	201;198	162	162	218;215	128;122	179	160;175;178	187;184	88	140;158;137;146	152	224;203	155	173;176;182	165	100;113	134;128;125	205	136;134;161;158;155	107;100;110	268;271;250;253
1222	Mashare C	Rundu	Kavango	Namibia	176	187	176;179	258	171	201	162	165	212	137	182	157	187	88;82;98;91;101	164	155	194	152;149	197	193;165	119	128	221	158	103;107;100	268;265
1243	Mashare C	Rundu	Kavango	Namibia	173	192	164	227;242	174	201;198	176	162	206;215	131;128;125	179	157;160	187	94;98;101	164;155	152;177	200;203	152	179;176;200;197	184;162	97	121;143	215	173;155	100;110	238;271;253;256
1246	Mashare C	Rundu	Kavango	Namibia	176;173	198;195;192	161;179	242	171	201;198	162	162;165	206	125;122	179	157;160	184	98;110;101	181;155	171;177;168	203;206;209	136;139	194;170;182	181;184	110;113;103	131	199;212;209	173;179;176;161;164	103;97	262
1264	Mashare C	Rundu	Kavango	Namibia	176	192	179	242	171	201	162	165	206	122	179	160	187	82;107;110;91;101	155	171	203	136	194	184	113	131	212	176	103	262;259
1267	Mashare C	Rundu	Kavango	Namibia	173	198	161;164	230;227	171	198	162	162;165	212	131;125;122	179	157;154	184	98;110;120;101	164;181;155	180;177;168	203;206;209	139;146	173;188;191;170	190;168;184;171;140	106;103	128;115;112	215;209;218	170;173;167;176;161;158;155	103;107;100;97	274;250;253;259
1268	Mashare C	Rundu	Kavango	Namibia	176;173	208;187	158	242	171	219;198	162	162;165	212	125	182	166;178	187;184	110	158;137;155	168;155	197;203	155	173;152;179	140	103;116	121;115	221;218	158;155	100;97	247
1269	Mashare C	Rundu	Kavango	Namibia	173	189	158	242	171	201	162	162	206	125	179	172	184	110	143;140	155	206	155	182	162	100	125	209	167	103;100	280
1270	Mashare C	Rundu	Kavango	Namibia	173	198	161	242	171	198	159	165	209	125	176	157	190	110	155	168	200	139	173	171	113	125	218	158	103;100	259
1271	Mashare C	Rundu	Kavango	Namibia	173	198	167	227;242	171	204;201;198	162	162	206	128;125	179;182	157	187	113;104	172;155	152	197	136	173;200;194;182	187;171;150	128;113;122;103	121	215;218	170;161;158;155;164	107;100;110	247
1287	Mashare C	Rundu	Kavango	Namibia	173	195	167	242	174	201;198	162	165	212	125;122	179	160	187;184	107;104	155	152	194;197	133	173;179;185;182	187;171	103	125	212	173;179;176;164	103;100;97	244;247
1288	Mashare C	Rundu	Kavango	Namibia	176;173	198;189	167;161	227;258;242	171;174	201;198	162	165	212;206	128;125	179	157	187	110;101	164;181;155	177;155	215;197;206	139	173	171;140;199	113;103	128;125	218	170;173;176;158	103;107;97;116	244;247
1289	Mashare C	Rundu	Kavango	Namibia	173	198;195	161;179	258	171	198	162;159	165	212;206;209	122	179	157;160	184	94;73;107;98;110;101	164;155	152	197;200	130;139	173;179	174	110;113	134;125	215;218	182	103;107;97;116	247
1290	Rundu DH	Rundu	Kavango	Namibia	173	198;195	170;173	242	171	198	162;165;156	168;165	212;206;215	131;119;122	179;167	157;160	187;184	94;107;98;110;113;120;101;116	164;155	152;177;165;168	194;197;200;203;209;212	136;139	173;152;179;200;170	165;181;184;171	110;106;113;116	118;134;121;128;125	215;221;209;218	170;161;158	113;103;107;100	235;268;250;247;253;265
1295	Sambyu HC	Rundu	Kavango	Namibia	173	202;198;189;195;192	170;167	261;258;242;245	171	219;201;198	162;156	168;165	224;206;227	134;131;128;125	179;182	157	187;184	129;120;104;101	164;172;155	152;165	194;197;200	139;143;146	179;170;161;146	143;165;184;171	110;100;116	118;121;128;125	212;209;205	143;146;170;167;152;149;161;164	103;107;100	268;271;262
1296	Sambyu HC	Rundu	Kavango	Namibia	173	198;189;195	173;164	230;227;242	171	198	162	165	212;206;215	131;128	179;167	157;154	187;184	110;120;101	164;155	171;158;152;177;168;155	194;197;203	136;139;149	173;179;188	174;168;177;171	110;106;116	128;112;131;125	215;218	185;170;173;167;179;182;164	103;97	241;247;253
1297	Mashare C	Rundu	Kavango	Namibia	173	198	176	227	171	198	162;159	162	218	128	179	160	184	88	155	152	224;162;221;227	139	173	165	110;113	125	205	179;158;155	100	271
1298	Mashare C	Rundu	Kavango	Namibia	179;173	192	158	227;242	171;174	201;198	168;165;156	162;165	206	128;122	179;182	166;160	187	110;120;104	134;137	152	209	155	173;194;182;215	168;171	91	121;128;125	215;221;218	170;173;167;161;158;155;164	107;100	256;259
1299	Mashare C	Rundu	Kavango	Namibia	179;173	198;195	158	242	171	201;198	156	162;165	212	125;122	179	160	187;184	120;104;101	140;137	168;162	200;203	155	173;170	184	110;88;103	118;125	215;205	173;176;161;158;164	103;107	268
1300	Mashare C	Rundu	Kavango	Namibia	182;176;173	198;195;204	167;176;164	258;242	171	201;198	165;159	162;165	206	149;131;128	179;167	157	184	123;110;101	164;155	152;177;168	197;200;212	136;146	176;182	174	106;122	109;121;125	227;209	170;167;176;182;158	103;100	274;265;259
1301	Mashare C	Rundu	Kavango	Namibia	176;173	195	173;167;176;179;164	227	171	198	168;162;165;156	162;165	212;206;218;215	131;128;125;122	179;182	157;160	184	88;107;110;104;101	164;155	152;177;168	224;194;197;200;203;191;209	136;139;133;143	173;179	165;177;171	100;106;113;103;97;91	121;128;131;125	209;205;218	143;146;170;173;167;152;179;149;176;158;155	94;103;107;100	232;235;268;271;274;250;247;253
1303	Mashare C	Rundu	Kavango	Namibia	173	198	167;185	242	174	204;201	168;162	162	197	116;122	179;182	160	187;184	110	155	165	209	136	173;176;170	174;168;165;171	110;106	128	215;227;205	185;170;167;149	103	268;274;250;256;259
1304	Mashare C	Rundu	Kavango	Namibia	176;173	198;192	170;176	242	174	198	162;159	165	206	128	179;167	157	187	110;101	164;155	165;168	197;206	139	179;170	184	110;106	128;125	221;212;209	121;161;158	103;100	268;271
1306	Sambyu HC	Rundu	Kavango	Namibia	173	198;189;195;192	173;167;176	227;242	171;174	219;201;198	162;165	168;162;165	212;206	146;131;128;122	179;167	157;160;154	187;184	94;98;113;91;120;104;101;85	164;155	152;177;165;168	224;218;194;197;203;209;212	139;143;146;155	152;179;176;197	165;184;171;162	110;85;100;106;113;103;116	128;131;125	215;221;209;205;218	170;173;167;161;158;164	103;107;100;97	244;232;268;241;262;250;247;253;265
1318	Sambyu HC	Rundu	Kavango	Namibia	179;173	195	173;167	242	171;174	219;201;198	162;156;159	168;162;165	212;206;197	137;146;128	179;167	157;160	184	110;113;120	181;155	152;177	162;194;197;200;209	136;139;155	179;176	174;187;184;162	100;106;103;116	128;131;125	218	161;158	103	235;238;223;229;262
1321	Mashare C	Rundu	Kavango	Namibia	176;173	198;195	167;176	242;236	171;174	198	143;162;165;156	168;165	206	125	179;182	157	187;184	110;113	164;155	152;177;165;168	218;194;197;191;209	152;136;143;155	173;179;176;197;182	165;184;171	110;122;103	121;125	215;218	170;173;161	94;103;107;100;97	238;271;274;247;265;256
1322	Mashare C	Rundu	Kavango	Namibia	176	195	176	242	171	198	162;159	165	212;215	134	182	157	184	123;110	164;155	165;168	187;162;194;191	139	197	165	100;103	131;125	218	170;167;164	94	292;268;271;295
1323	Mashare C	Rundu	Kavango	Namibia	179;176;173	202;195	170;173	242	171	204;201;198	162;165	162;165	212;206	122	179	157	190;184	107;98;110;91;104;101	164;155	152	194;203	139;149;143	179;170;182	168;181	106;103	131;125	212;209;205;202	161	103;107;100	268;271
1324	Mashare C	Rundu	Kavango	Namibia	173	198	167	242	171	201	162	165	215	122	179	157	187;184	113	155	168	197;203	136;139;133;143	179;182	168;171	106	134	209	185;143;176;182;161	107	268;253
1325	Mashare C	Rundu	Kavango	Namibia	173	195	167;164	242	171;174	201;198	162;156	162;165	212;206	128;125;122	179	163	187;184	107;110;104	155	152;165;168	194;197;200	136;133;143	182	165;171	100;106	128;125	212;209;205;218	143;149;176	94;103;107;100;97	244;250;247
1330	Sambyu HC	Rundu	Kavango	Namibia	173	198	167;176	242	171	198	162	165	206	128	179	157	187	110	155	171;177;168	162;194	136	179;176;182	174	110	128;125	218	179;182	94;97	247
1335	Rundu DH	Rundu	Kavango	Namibia	176;173	198;189;195	170;173;167;176;164;185	258;242	171	198	162;165;156	168;165	212;206;215	134;140;131;119;128;125;122	188;179;167	157	187	126;110;120;101	164;155	152;177;165;168	194;197;200;209	139	173;152;179;176;200;194;185;170	181;184;171;199	94;110;100;106;113;116	134;121;128;125	215;221;212;218	170;173;167;149;161	113;103;107;100	268;271;298;300;262;250;247;253;265
1337	Rundu DH	Rundu	Kavango	Namibia	173	198;195	170;173;176;164	258;242	171	201;198	162;165;156	168;165	212;206	134;131;119;128;125	179;182;167	157;160	184	126;91;120;101	164;155	152;177;165	197;200;209	136;139;143	173;152;179;170	181;177;171	94;110;100;106;113;116	134;121;128;125	215;221;218	170;173;167;152;161;158;164	113;103;107;100	268;271;262;250;247;253
1344	Mashare C	Rundu	Kavango	Namibia	173	198;195	167;176	227;242	171;174	204;219;201;198	162;159	168;162;165	206;209	146;128;125;122	179;182	157;160	187;184	88;110;113;104	155	171;152;177	162;221;218;194;197;200;209	136;139;146;155	173;179;176;197;170;182	174;184;171;150	122;103;116;97	121;128;125	215;221;209;205;218	170;173;167;152;179;176;182;161;158;155;164	103;107;97	229;262
1345	Mashare C	Rundu	Kavango	Namibia	173	198;195	167	227;242	171	198	156	162;165	212;206	131;128	179	157	187;184	129;110;113	155	152;165	194	136	173;182	174;171	113;103	121	215;209;205	182	103;100;97	244;241;229;274;277;247
1347	Mashare C	Rundu	Kavango	Namibia	179;176	198;195	161;158	242	171	201;198	162;165	162;165	212;206;215	134;125;122	179	166;169;172	190;187	107;110;104;101	143;134;140;149;137	152;168	194;197;200;191	155	179;176;170;182	168;165;181;171	110;100;106;113;103	134;121;128;131;125	212;209;205;218	167;152;161;158	94;103;107;100	268;271;250;247;253
1349	Mashare C	Rundu	Kavango	Namibia	176;173	198;189;195;192	173;167;164	230;227;242	171	201;198	162;165;156	168;165	206;215	119;128;122	179;182	157;154	187;184	88;107;110;120;104;101;116	164;181;155	152;165;168;155	194;200;203	136;149;143;146	173;152;179;176;188;182	168;165;171	110;100;106;113;103	121;128;112;125	212;209;205	143;170;173;167;152;149;182;161;158;155;164	94;103;107;100;97	244;235;238;241;229;250;247;253;256;259
1350	Mashare C	Rundu	Kavango	Namibia	176;173	198;195;192	167;176	227;242	171	198	162;165	168;162	206;227;218;215	119;128	179	163	184	88;107;110;91;101	155	152;165	224;200	139;149	173;176	174;165	110;106;113	121;125	221;209;205;218	143;152;149;158	103;100;97	286;289;271;250;253
1353	Sambyu HC	Rundu	Kavango	Namibia	173	198;195	167	227;242	171;174	219;201;198	162;156	168;162;165	206;215;209	146;131;128	179	157;160	187;184	110;113;104	164;155	152;177;165;155	221;218;194;197;200;209;212	139;155	173;179;176;197;170;182	174;165;184;177;171	110;100;106;122;103;116;97	121;128;125	215;221;205;218	170;173;167;152;179;176;161;158;155;164	103;107;100;97	244;268;229;262;247;265
1358	Rundu DH	Rundu	Kavango	Namibia	173	187;198;195	170;173;167;176;161;179;164	227;242	174	201;198	162;165;156	168;162;165	212;206;209	131;119;128;125	179;182	157;160	184	126;132;110;113;91;120;104;101	172;155	152;177;165;168;155	197;200;209	152;136;139;133;146	176;185;182	187;181;184;177;171	110;100;106;113;122;116	140;128;115;131;125	221;212;209;205;218	170;173;167;149;158;164	103;100;110	268;274;277;250;247;253;265;256
1361	Rundu DH	Rundu	Kavango	Namibia	176;173	187;198;189;195;192	170;173;167;176;161;179;164	227;242	171;174	201;198	162;165;156;159	168;162;165	200;212;206;215;209	119;128;125;122	179;182;167	157;160	187;184	123;126;132;107;129;110;113;91;120;101	172;155	152;177;165;155	162;194;197;200;203;209	152;136;139;133;146	155;173;152;179;176;191;194;185;170;182;161	174;187;181;177;171	110;100;106;116;97	134;121;140;128;115;131;125	212;209;205	170;173;167;152;179;149;176;161;158;164	103;100	268;262;250;256
1365	Sambyu HC	Rundu	Kavango	Namibia	173	202;195	161	227;258;242	171	204;201	168;165	165	212	125;122	179;182	160	187;184	88;94;107;98;110;113;120	164	152;168;155	197;206	136;146	155;173;152;197	181	100;106;113;91	121;128	215;221;209;218	179;176;161;158	103;107;100;97	268;283;271
1367	Mashare C	Rundu	Kavango	Namibia	179;173	195;192	167;176;164	227;258;242	171;174	201;198	162;165;159	162;165	212;206;197;203;209	140;128;122	179;182	157	187;184	88;98;91;120;101	164;155	152;165;168;155	194;197;200;206	139;133;158	206;173;152;176;188;185;197	177;171	110;106;113	121;128;131;125	215;212;209	170;161;158	103;107;100	268;271;274;277;250
1368	Mashare C	Rundu	Kavango	Namibia	176;173	198;195	167	227;242	171;177	198	162;165	162	215	119	179	163	184	88;107;98;110;113;91;104	164;155	152;165	200	136;149	173;179;176;197;170;182	174;165;171	110;113;122;103	121;125	215;221;205;218	170;152;149;161;155	94;103;100;97	235;268;247
1369	Mashare C	Rundu	Kavango	Namibia	176;173	195;192	167	242	171	198	162;165	168;165	206;215	119	179	163	184	110;101	164;155	165	200;165	149;158	173;176	174	110;106	121;125	221;218	152	103;100	286;268
1370	Mashare C	Rundu	Kavango	Namibia	176;173	198;189;195	173;167;164	242	171	201;198	162;165	168	206;215	119;125	179;182	157;163	187	88;82;107;98;110;113;91;104;101	164;155	165;168;155	194;197;200;191;206	136;139;149;143;158	176;182	174;168;165;184	110;100;106;113;103	121;125	221;212;209;205;218	170;167;152;149;161;155	94;103;100;97	268;271;280;262;247;265
1371	Mashare C	Rundu	Kavango	Namibia	176;173	198;195	173;167;176	242	171	201;198	162;165;156	168;162;165	212;206;215	134;119;128	179	157;160;163	184	123;110	164;155	152;165;168;155	162;194;197;200;191	136;139;149	179;197;182	174;159;165;171	110;100;106;113;103	121;128;131;125	215;221;209;205;218	143;170;167;152;149;176;161;158;155;164	94;103;107;100	292;268;295
1373	Mashare C	Rundu	Kavango	Namibia	173	198	176	227	171	198	162	162	218	128	179	160	184	88	155	152	224;209	139	173	165	113	125	205	158;155	103;100	271
1380	Rundu DH	Rundu	Kavango	Namibia	176;173	198;189;195;192	161;158	227;242	171;174	198	162;165	168;162;165	212;206;209	131;119;128;125	179;182	160;163;175;178;172	187;184	123;126;110;113;91;120;104;101	143;134;140;137;146;152	152;177;165;168;155	197;200;209	155	155;173;152;179;176;185;170;182;161	174;187;181;177;171	110;100;106;116	121;140;128;115;131;125	215;221;212;209;218	170;173;167;152;179;149;176;161;158;155;164	113;107;100;110	268;274;277;262;253;256
1475	Ndama C	Rundu	Kavango	Namibia	173;185	192	164	242	171	201	156	165	206	131;125	179	157	187;184	107;110;91;101	146;155	189	197	152	179	177;202	103	134;128	215;218	161;158;155	107	256
1476	Ndama C	Rundu	Kavango	Namibia	173	198;189;195;204	170;173	258	171;174	201;198	162;165	162;165	206;215	125	179	157;160	187;184	129;91;120;101	164;155	152;165;162	200;212	152;139	173;188	174;177	110;100	134;121	215;212;209	182;161;158	100	268;250;253;256
1477	Ndama C	Rundu	Kavango	Namibia	173	198;195	164	242	171	219	159	165	212	119	179	160	187	104	155	152	200	136	173	174;165	113	131	221	152	103;100;110	265
1478	Ndama C	Rundu	Kavango	Namibia	173	195	170	258	171	198	162;165	162;159	206	119;125	182;167	160	184	107;110;101	155	165	194;197;191	143	179;176	174;184	110;100;106;113	134	215;218	170;173;167;152;158;155	103;100;97	253
1479	Ndama C	Rundu	Kavango	Namibia	176;173	202;198;195;192	170;173;167;164	227;258;242	171	198	162;165;156	162;165	212;206;215	119;125;122	179;167	160	187;184	88;94;82;107;98;139;110;113;91;104;101	164;155	152;165;168;155;189	194;197;200;203;206	136;139;149;146	173;179;176;194;197	174;193;177;171;196	110;100;106;113	134;128;115;125	215;209;218	170;167;149;158;155	94;107;100	232;235;238;271;250;247;253;265
1480	Ndama C	Rundu	Kavango	Namibia	173	192	158	242	171;174	198	162	165	206	119;125	179	166;163;178	187	107;98;110;101	143;140;137;146	165	200	155	173;164;188;194;203	174;171;208	110	121;115	215	167;155;164	107;100	235;238
1481	Ndama C	Rundu	Kavango	Namibia	173	189;192	170;173;185	258;242	171;174	201	162;156	162;165	212;215	131;125	179;182	157	187	110;101	164;155	171;155	200;191	136;139;149	173;179;176	174;168;181;171	97	131;125	212;209;205;218;202	185;170;179;182;161;164	103;107	268;271
1482	Ndama C	Rundu	Kavango	Namibia	173	192	170;173;179;164;185	227;242	171;174	198	162;165;156	162;165	206;215	119;125;122	182;167	157;160	187;184	107;98;139;110;113;101	164;155	152;165;168;155;189	218;200	130;139;149;146	173;179;176;188;200;191;194;185;197;182;203	174;168;208	110;100;106;113;103	134;121;128;115;125	215;221;212;209;218	170;173;167;152;176;182;161;158;155;164	94;107	232;235;238
1483	Ndama C	Rundu	Kavango	Namibia	176;173	198;195;192	170;173;179	227;242	171;174	201;198	162;165	162;165	206;215	116;137;119;125;122	179;182;167	157;160	187;184	94;107;139;110;113;104	164;155	152;165;189	224;194;197;200;206;212	136;139;149;146	173;179;176;188;191;194;197;182;203	174;181;177;162	110;100;106;113;103	134;128;115;125	215;209;218	170;167;158;155;164	94;107	244;235;238;271;277;262;250;247;253;265;256;259
1486	Ndama C	Rundu	Kavango	Namibia	173	208;198;195;204	158	258;242	171	198	162;165	162;165	224;215	128;125;122	185;179;182	181;169;172	187;184	110;91;120	143;134;149;137;146;152	177;165;155;162	194;197;200	155	209;173;179;188;200	174;181;177;171	110;136;100;106	118;121;140	215;221;212;209;218	170;167;161;158;164	103;100	262;250;253;265;256;259
1487	Ndama C	Rundu	Kavango	Namibia	173	204	173	258	171	198	162	165	215	125	179	157	187	91;101	164;155	162	200	139	188;185	187;177	110	121	215	167;158	103	268;271;253
1499	Ndama C	Rundu	Kavango	Namibia	173	198	161	245	171	198	162	165	206	128	167	157	184	101	155	165	197	139	173;176	184	110	134	205	146	113	250;253
1500	Ndama C	Rundu	Kavango	Namibia	176;173	192	176	242	171	198	165	165	206	128	185	157	187	110	155	171	165;191	146	179;188;185;182	193	110;106;103	149	218	152;149;155	103;107;100	268
1501	Ndama C	Rundu	Kavango	Namibia	173	198	164	230	171	198	162	165	206	122	179	157;160	187	120	164	168	203	146	179;188;185	171	106	125	209	170;149	103;97	253
1502	Ndama C	Rundu	Kavango	Namibia	173	192	170	227	174	198	165	165	215	122	182	157	184	139	155	152	200	139	176;188;191;194	159;162	103	134	221	158;155	107	265
1503	Ndama C	Rundu	Kavango	Namibia	173	198;195;192	170;173	258;242	171	198	165	162;165	212;206	134;122	179;182	160	184	139;110;113;101	164;155	168	218;200	130;149	173	174	106	121;128	209	170;152	94	277
1505	Ndama C	Rundu	Kavango	Namibia	173	195	161	242	171	201	162	162	212;215	125	179	157	187	91	155	165	191	146	194	174;187;177	100	134;121	209	161	100;97	280
1507	Ndama C	Rundu	Kavango	Namibia	176;173	198;192	170;176;158	242	171	201;198	165;159	162;165	206;218	125;122	179	157	184	107;129;110	164;137;146;155	152	197;200	139;143	191;197;170	168;140	100;116	125	215;212;209	173;176;161	110;97	268
1508	Ndama C	Rundu	Kavango	Namibia	173	189;195	170;167;161	227;211;214	171;174	201	176;162	165	212	131;128;125	179	157;160	174;187;184	104;101	164;155	168	197;206	152;139	173;152;179;200;191	177;171	110;100;113;116	128;131;125	215;199;212;209	146;167;149;176;158;155;164	103;100	235;268;271;247;253
1510	Ndama C	Rundu	Kavango	Namibia	173	195	173	242	174	201	162	162	197	137;128	179	175	187;184	110	155	165	212	146	176	177	110	128	199;209	161;158	103;100	271
1512	Ndama C	Rundu	Kavango	Namibia	173	192	158	258	171	201	162	165	212	128	179	181	187	110	140;149;152	155	200	155	188;185	181	110	118	209	143;146	103	271
1520	Ndama C	Rundu	Kavango	Namibia	176	195	170	261	171	198	162	165	212	128	182	157	187	113	155	158	197	136	179	165	100	121	215	176	97	274
1523	Ndama C	Rundu	Kavango	Namibia	176;173	198;189;195	158	227;258;242;211;214	171;174	201;198	176;162;165	162;165	212;206	134;119;128;122	179;182	166;160;163;169	174;187;184	110;120;104;101	149;146;152	152;168	197;200;206	155	173;152;179;188;191;194;221	174;137;177;171	110;100;106;113;103;116	121;128;131;125	215;199;212;209;218	185;170;173;167;152;176;182;158;155;164	94;103;107;100;97	271;262;247;253;265
1525	Ndama C	Rundu	Kavango	Namibia	173	189	164	258	171	198	165	165	206	134	182	160	187	91	155	165	200	139	176	177	106	121	215	167;164	103;100	268
1526	Ndama C	Rundu	Kavango	Namibia	173	198	173	242	171	198	162	165	206	128;122	179	157;160	187	120	164	171;168	194	136	179	174	110	125	215;212;209;218	109;182	97	253
1530	Ndama C	Rundu	Kavango	Namibia	173	198;189	158	242	171;174	198	171;162	165	212;206;203;215	134;137;131;125;122	179;182	166;184;172	187;184	123;129;110;113;91;101	143;134;140;137;152	165;155;162	194;197;200;191;206	155	173;179;200	168;181;184;171	106;103;91	121;128;131;125	215;218;224	185;170;173;167;179;176;182;158;155	103;100	244;271;274;277;250;247;253
1533	Ndama C	Rundu	Kavango	Namibia	176;173	195	170	245	171	201	156	165	212	125	167	157;160	184	101	155	152;177	218;203	139	179;191;194	190	106;113	118;128;125	215	167	113;103	268
1545	Ndama C	Rundu	Kavango	Namibia	173;185	189;192	173	242	179;171	198	162;156	165	206;215	131;128	179	157	187;184	110;101	155	171;152;168;189	162;194;197	130;152;149	179;176;182	174	110;106;113;103	121;128;131	218	185;179;182;161;158;164	103;107;100;97	247
1546	Ndama C	Rundu	Kavango	Namibia	176	198	176	242	171	201	162	165	212	125	179	160	187	101	164	168	200	143	179;182	184	106	121	212	155	100;97	286
1548	Ndama C	Rundu	Kavango	Namibia	173	189	158	258	171	198	168	165	209	122	182	160	184	120	134	168	206	155	185;182	177	103	131	218	158	113;110	250;247
1549	Ndama C	Rundu	Kavango	Namibia	173	198;195	167;164	242;254	171;174	201	165;159	165	206	119;128	185;179	157;160	187;184	110;101	155	152;155	215;197;206	136	173;200	168;165;171	113;103	121	221;218	170	103	268;271;274;250;265
1551	Ndama C	Rundu	Kavango	Namibia	173	198;195	170;176	258;242	171	198	162;165	168	212	125	179	157	187;184	101	155	180;177	203;212	152;136	179;200;197;170;182;203	174;177	110	121	205	167;149	103;107;100	250;253
1555	Ndama C	Rundu	Kavango	Namibia	173	195	173	227	191;171	201	162	165	206	116;119	179;176	151;175	184	82;107;110;91;101	155	152	209;212	130;127	188;191;194	168;184	110;113	128;131	218	146;173	107;110	286;283
1557	Ndama C	Rundu	Kavango	Namibia	173	195	167	242	171	198	162	165	206	128	179	157	187	110	164	152	200	136	197	171	103	125	218	179	103	280
1652	Rundu DH	Rundu	Kavango	Namibia	176;173	198;189;192	170;161;185	227;242;248;245	171	198	162;165	162;165	212;206;221;215	131;128;125;122	185;179	157;154	187;184	139;91;120;101	164;172	171;152;177;165;168;155	215;194;197;203;209	152;136;139;149;143;155	179;176;200;185;197;170	174;187;184;177;171	110;100;106;122;97	134;121;128;115;125	215;221;209;205	161;155;164	103;107;97	286;268;277
1653	Rundu DH	Rundu	Kavango	Namibia	173	198	167	227;242;288	171;174	198	162	162;165	215	134;131;119;128;125;122	179	157	187;184	91	155	152;168	194;197	152;139	170;167	187;184;171	110;113;103;116	134	205	191;185;188;167;179	103;100	271
1655	Rundu DH	Rundu	Kavango	Namibia	173	189;195	167	227	174	198	156	165	212;206	122	179	157;154	184	110;113;104;101	155	152	203	133;146	173	137;181	116	118;128	209;218	109;121;158;155	103	280;262
1656	Rundu DH	Rundu	Kavango	Namibia	176;173	208;198;195;192	170;173;167;176	227;242;248	171	201;198	168;162;165;159	165	212;206;221;215	131;128;125;122	179;167	160;154	190;187;184;178	110;91;120	164;172;155	152;177;165;168;155	194;197;200;203	152;139;149;143	206;173;179;200	174;147;168;187;181;177;171;140	110;106;113;122	134;121;128;131;137;125	212;209;205	118;170;173;179;161;158;164	103;107	268;274
1660	Rundu DH	Rundu	Kavango	Namibia	173	208;195;192	170;167	227;242;248	165;174	198	168;162;156;159	162;165	212;206;221	137;122	179;182	157;160;154	190;187;184;178	110;91;120;101	164;172	152;177;165;168;155	194;197;200	152;136;139;149	206;179;176	174;137;147;187;184;171;140;162	110;100;106;113;122;103;97	121;128;115;131;137;125	209;205	118;179;161;158;155	103;107;100;110	268;247
1661	Rundu DH	Rundu	Kavango	Namibia	179;176;173	208;198;195;192	182;185	242	171	219;201;198	168;162;165	165	224;212;206;230;215	128;122	182;167	160;175;178	187	110;101	155	152;165;168;155	224;197	130;152;139	173;152;221	137;171	110;103	134;128;131;125	215;209;205	185;173;161;158	103;107	268;274
1662	Rundu DH	Rundu	Kavango	Namibia	173	202;189	167;164	242	171;156	198	162;165	162;165	212	128	179	157	187	110	155	171	206;209;212	136;149	155;152;158	187;171	100;122;119;116	121	212	167;161;155	110	268;253
1663	Rundu DH	Rundu	Kavango	Namibia	176	198;192	173	242	171	201	165	162	206	131	179	157	184	101	155	189	197	152	179;182	190	100	128	221;205	167	103	268
1664	Rundu DH	Rundu	Kavango	Namibia	176	192	170;173	242	171;174	198	162;165	165	206	131	179	157	184	82;139;110;91;120;101	155	177	162;197;203	152;139	185;182	177	100;97	128	215	155	100	268;277
1675	Rundu DH	Rundu	Kavango	Namibia	173	189	170	258	171	201	162	165	206	128	179	160	187	123;94;113;120;104;101;85	164	165	194	152;149;155	179	181	100;103	125	221	161	103;107	271
1677	Rundu DH	Rundu	Kavango	Namibia	176;173	202;187;198;189;192	167;161;158	227;258;242	171	201;198	153;168;162;156;159	168;162;165	212;206;197;209	131;128;122	179	157;160	187	123;76;126;88;98;110;91;120;101	164;172;155	152;165;189;162	194;197;206	152;139;133	173;176;191;185;170	190;168;181;184;177;171;140	110;100;103	128;115;131;125	221;212;205;218	118;167;176;161;158	113;103;107	235;268;271;250;247;253;256
1680	Rundu DH	Rundu	Kavango	Namibia	173	198;195	164	227;242	177;174	201	162	165	212;206	131	179	157	187	139;110	155	152	162;194;197;212	130;139	173;170	168;187;171	110;106;113	125	205	170;173;167;152	103;107;100	271
1682	Rundu DH	Rundu	Kavango	Namibia	173	208;192	170;173	242	171	198	168;159	162;165	212;221	134;137	182	160	190;184;178	110;113;101	164;155	152	197;200;191	152;139	173;152	174;147;150	110;106;113;119;116;91	128;131;137	227;221;209;205	143;152;161;158;155;164	103;100	244;268;262;247
1684	Rundu DH	Rundu	Kavango	Namibia	173	192	161	227	171	201;198	162	162	212	125	179	157;160	184	110;113;104;101	164;155	165	197;212	139;146	176	174;147	110;113	118	205	158;155	103	274;277
1685	Rundu DH	Rundu	Kavango	Namibia	173	202;187;198;189	170;176;161;158	227;242	171;174	201;198	162	162;165	212;206;197;203	116	179;182	157;160	174;187;184	126;110;91;101	164;172;155	152;165;168	194;197;203	152;136;139	179;176;191;170	174;193;177;171;196	100;106;103	121;128;115;125	215;209;205;218	118;191;170;173;176;161;158	103;107	238;241
1686	Rundu DH	Rundu	Kavango	Namibia	176;173	202;187;198;189;195;192	170;173;176;161;179;158	227;258;242	171	201;198	153;162	162;165	212;206	131;128;125;122	179;182	157;160	187	123;126;88;129;110;91;120;101;116	164;172;155	152;165;168;162	194;197;191	152;139;143;146	179;200;191;197;170	174;165;181;171;140	110;100;106;103	121;115	199;221;209;205;218	118;191;115;176;161	103;107	268;271;262;250;253;265
1687	Rundu DH	Rundu	Kavango	Namibia	176;173	202;189;192	170;161;158	227	171;177	201;198	153;150;162;165;156	168;162;165	206;197	131;128;122	179;182	157;160	187	123;110;91;120	164;155	152;165	194;197;200;191	152;139;146	173;152;179;176;197;170;182	187;140	110;100;106;113;103	121;128;115;125	199;212;209	118;121;115;176;161	103;107;100;110	268;271;262;253;265
1698	Rundu DH	Rundu	Kavango	Namibia	173	187	176	227	174	201;198	162	165	212	122	179	157	187	126;88;107;98;116;79	172;155	162	197	139	191;170	171	106	115	205	118;191	103;107	268
1699	Rundu DH	Rundu	Kavango	Namibia	176;173	187	179	227;242	171	198	162;165;159	162;165	206	122	182	157	187;184	101	155	162	215;194;197	152;139	179;176	187;171	110;106	121;115;125	209;205	118;161;158;155	103;107	280
1700	Rundu DH	Rundu	Kavango	Namibia	176;173	187;195	167;176	227;242	171;174	201;198	162;165;159	165	206	137;119;128;122	179;182	160	174;187	110;91;101	164;172;155	152	194;197	152;139	170	177;171	113	121;128;115;125	205	118;146;161;158;155	103;107	274;262;250;253;256;259
1701	Rundu DH	Rundu	Kavango	Namibia	173	208;187;198;189;195;192	170;173;167;176;161;158	227;242	171;174	201;198	168;162;165;159	162;165	212;206;221;215	137;128;125;122	173;185;179;182	157;160	174;190;187;184;178	98;110;113;91;104;101	164;172;146;155	152;177;165;168;162	197;200;212	152;139;143;146	173;152;179;176;191;185;197;170	174;147;177;171;140	110;100;106;113;103	118;121;128;115;131;137;125	209;205	118;173;167;152;161;158;155	103;107;100	244;268;274;277;250;247;265;256
1702	Rundu DH	Rundu	Kavango	Namibia	176;173	208;195;192	170;167;161	227;242	171	201;198	168;162;165;159	165	224;233;212;206;221;215;209	137;128;125	173;185;179;182;176	157;160	190;187;184;178	110;101	164;181;146;155	171;152;177	197;191	152;139;143;146	173;152;176;185;197	147;177;171;153	110;106;113	118;149;128;131;137;125	209;205;218	173;152;176;161;158;155	103;107	244;268;271;262;250;247;253;265
1704	Rundu DH	Rundu	Kavango	Namibia	176;173	208;198;195;192	167;188	230;227;242	171;174	201;198	162;156;159	162;165	224;212;206;221;218;209	137;149;131;128	173;179;182	157;160	190;184;178	110;101	164;155	152;180;177;165;168;155	197;212	152;139;143	173;152;176;191;197;170;149;167	147;187;177;171;153	110;113;103;91	121;128;131;137;125	212;209;205;218	170;173;167;176;161;158;155;164	103;100	268;274;277;250;247;265
1706	Rundu DH	Rundu	Kavango	Namibia	176;173	195;192	173;167;161	227;258;242	171;174	201;198	159	165	212;206;215;209	128;122	173;179;182	157;160	187;184;178	110;101	164;172;137;146;155	152;177;168;155	197;200;206	139;143	209;173;152;179;176;188;197;170	184;177;171	94;110;113;103	121;131;125	215;221;209;205;218	173;152;161;158;155	103;107;100	268;271;274;277
1707	Rundu DH	Rundu	Kavango	Namibia	176;173	187;195;192	161	227;242	171	201;198	162;159	165	206;215	143;128;122	179	160	187;184;178	104;101	140;137	152;155	197	155	179;176	177;171	94;106	121;115;125	209;205	143;146;149;158	107	268;280;262
1708	Rundu DH	Rundu	Kavango	Namibia	173	198	170	242	179;171	198	162	165	215	128	182	160	184	82;129;91;101	164	171	203	136	179;176	171	125	125	215	161	103;100	268;271
1722	Rundu DH	Rundu	Kavango	Namibia	176;173	195;192	170;173;176;161;158	261;227;258;242	171;174	201;198	153;162;165;156	168;162;165	206;197;215	128;125	179;182	157;160	184	123;139;129;110;113;91;120	164;172;155	158;177;165;155;162	197;200;203;191;212	139;143;146	173;179;176;200;197	174;147;165;181;177;171	110;100;113;103;116	121;128;115;131;125	215;199;221;212;209;205;218	118;170;167;161;158;155	113;103;107;110	244;232;268;271;241;250;253
1723	Rundu DH	Rundu	Kavango	Namibia	173	195	167	242	171	198	162	168	206	128	179	157	187	123	164	152	224	146	197	171	100	140	218	173	103	241
1724	Rundu DH	Rundu	Kavango	Namibia	173	195	167	276;227	171;174	198	162;159	168;165	206	119;128	179;182	160	184	101	164	152	162;197	139;146	173;176	177;171	110;100;113;91	140;131;125	209	173;158;155	107	256
1727	Rundu DH	Rundu	Kavango	Namibia	176;173	195;192	170;167	227;242	171;174	204;198	168;162;165;156;159	165	224;206;209	137;128;122	173;179	160	187;184;178	110;101	164;155	152;177	221;197	136;139;143	173;152;179;176;191;197;170;182;203	147;168;181;184;177;171	110;97;91	128;131;125	209;205	170;173;167;179;161;158;155	103;107	268;271;262;247;253;265
1730	Rundu DH	Rundu	Kavango	Namibia	176;173	198;195;192	173;167;161	258;242	171;174	201;198	162;156;159	168	206;221;197	128;125	179	157	187;184	123;110;113;120;101	164;155	152;177;165	162;200;206;209	139;143;146	176;197	181;171	100;116	121	209;205	121;170;173;161	113;103	232;241;250;253
1738	Sambyu HC	Rundu	Kavango	Namibia	173	198	170	242	171	198	156	165	212	131	179	157;169	184	82;129	155	165	194	136	182	174	113	121	209	173;182	103;100	253
1762	Kaisosi C	Rundu	Kavango	Namibia	176;173	187;198;195;192	170;167;176	242	171;174	201;198	162;165;159	165	200;212;206	128;122	179;182;167	157;160	187	110;101	164;155	171;165;168	197;200;206	130;136;139;143	179;170	181;184;177;171	110;106;113	128;131;125	221;212;209;205;218	152;161;158;155	103;107;100	271;241;259
1763	Kaisosi C	Rundu	Kavango	Namibia	173	195	173	227	171	198	162	165	221	128	182	157	184	110	164	168	197	139	188;191	165	119	131	209	158	103	262
1776	Kaisosi C	Rundu	Kavango	Namibia	179	195	161	258;242	171	201;198	165;156	162;165	212;206	122	179	157	184	110;113;120;104;101	164;155	168;162	200;203	139	173	184	110;103	118;125	215	173;176;161;158;164	103;107	274
1779	Kaisosi C	Rundu	Kavango	Namibia	173	187;198;189	173;167;176;164	242	165;171;174	201;198	162;165;159	162;165	212;206;209	128;125;122	179	157;160	187;184	110;120	164;155	171;152;165;168;155	194;197;203	136;146	173;176	174;168;171	110;100;106;97	134;128;115	221;218	143;179;176;182;155	103;107	268;277
1801	Kaisosi C	Rundu	Kavango	Namibia	176;173	189;195	167	242	171	201	162	162;165	206	128	170;182	157	190;187	129;101	155	155	203	139;146	173;152;182;203	181	110;103	121	209	136;149;182	103	268
1807	Kaisosi C	Rundu	Kavango	Namibia	173	198;195;192	170;167;161;182	242	171	201;198	168;162;165	165;174	206;221;215;209	119;125;122	179;167	157;160	187;184	123;110;91;120	164	152;165;168;155	194;200;203;209;212	152;136;146	179;176;185;170;182	171	110;100;106;113;119;103;97	134;131;137;125	212;209;205	146;161;158;164	94;103;110	262;247;265
1818	Mashare C	Rundu	Kavango	Namibia	173	198;189;195;192	170;167;161;164;158	227;258;242	165;171;174	201;198	162;165;156;159	162;165	212;206	134;128;125;122	185;179;182	157;160;175	187;184	110;91;120;101	164;155	171;152;165;168;155	215;194;197;200;203	130;152;136;139;143;146	173;152;176;197;170;182;203	174;168;165;177;171	110;100;106;113;103;91	134;121;140;128;115;131;125	212;209;205;218	143;146;173;167;152;149;176;101;161;158;155;164	103;107;100;110	271;259
1820	Kaisosi C	Rundu	Kavango	Namibia	179	195	164	258	171	198	162	165	218	131	179	157	184	139	155	155	203	149	179	184	97	125	209	152;155	100	268;271
1824	Kaisosi C	Rundu	Kavango	Namibia	173	189	170;173	242	171	201;198	183;162	162;165	212;206	143;131	179	157	187	107;110;101;116	155	165;168	197	143;146	173;197	171	94;103;91	121;131	212	188;170	103;107	268
1825	Kaisosi C	Rundu	Kavango	Namibia	173	198	167	242	171	201	171;165	165	212	134	182	157	184	123;113;120	164	165	194	136	179	184	106	121	215	176	103	268
1826	Kaisosi C	Rundu	Kavango	Namibia	173	195	164	242	171	201	159	165	206	134	167	157	184	110	155	152	197	136	173	168	113	128	199	161	103	265
1829	Kaisosi C	Rundu	Kavango	Namibia	179;176;173	198;195;192	167;161	227;258;242	171	201;198	162;165;156	168;162;165	212;206;221;215	119;128;125	179;182	157;163	187;184	88;94;110;104;101	164;155	171;152;165;168;162	194;200;203;209	152;136;139;149	173;152;179;176;197	174;165;184;171	110;116	118;121;128;131;125	205	170;173;152;176;161;155;164	103;107;100;110;97	274
1833	Kaisosi C	Rundu	Kavango	Namibia	173	202	161	227	171	201	165	165	212	122	179	160	187	120	172	165	203	146	191	165;162	106	128	215	158	103	271
1845	Kaisosi C	Rundu	Kavango	Namibia	176;173	198;195;192;204	167;164;182	227;242	165;174	201;198	168;162;156	162;165	206;215	125;122	173;179;182	157;160	187;184	110;113;120;101	164;155	152;165;168;143;140	197	130;139;149;143;158	152;179;176;170;182;203	171	110;100;113	134;128;115;131	215;221;209;205;218	185;173;167;152;161;158;164	113;103;107;110	268;250;247;253
1847	Kaisosi C	Rundu	Kavango	Namibia	176;173	198;189;192	173;167;161;155	227;242	165;171;174	201;198	162;165;156	165	212;206;215	131;125;122	179;182	157;160	187;184	110	164;155	152;165;168;155	197;200;203	136;143;158	176;191;170;182	181;184;171	100;106;113;91	134;128;131	221;209;205;218	167;152;161;158;164	113;103;107;100;97	241;262;247
1848	Kaisosi C	Rundu	Kavango	Namibia	173	195;192	173;167	227;242;248;233	174	201;198	162;156	162;165	212;206;221	128;122	179;182	157;154	184	110;120;101	164;172;155	155	197;212	152;136;149	173;152;179;200	187;177;171	110;106;113	128;115;131;125	205	167;161;164	113;103;107	271
1863	Sambyu HC	Rundu	Kavango	Namibia	173	198	161	258	171	201	162	165	215	122	179	154	184	116	155	165	200	139	200	181	100	121	209	170	103	259
1884	Sambyu HC	Rundu	Kavango	Namibia	176;173	198;189	173;167	258;242;248	171	201	162	165	215	116;122	179;182	160	187;184	110;120	164;155	155	203;191	130;152	173;179;200;197	159;147;184;171	94;106;119	131	215;205	152;176;182	103;97	271;277
1916	Sambyu HC	Rundu	Kavango	Namibia	182;173	189	173;167	227;242	171	201;198	162;165	165	215	128;122	179;182	157	187	113;120	164;181	171;155	194;197	136;143	179;200;197;182	174;181;162	110;113	134;131	215;209	179;161;164	100;97	271;241;253;259
1939	Sambyu HC	Rundu	Kavango	Namibia	176;173	198;189;195;192	170;167	227;258	171	198	162;159	165	212;206	131;128;122	179;167	157	187;184	88;113;120	155	177;168	194;203	136;139	173	190;187;177;140	110;133;106	118;134	212;209;205	185;170;173;167	113;103;110	244;271;262;247;265;256
1942	Sambyu HC	Rundu	Kavango	Namibia	173	198	176	227	171	198	162	162	218	128;122	179	160	184	88	155	152	224;194	139	173	165	113	125	205	158	100;97	271
1943	Sambyu HC	Rundu	Kavango	Namibia	182	189	167	227	171	201	165	165	215	128	182	157	187	113	164	155	197	143	200	181	113	134	215	161	100	271
1945	Kayengona C	Rundu	Kavango	Namibia	173	202;195	170;158	242	165;171	201;198	162;165	162;165	212;221	131;128;122	167	160	187;184	123;110;101	164;155	152;165;168;155	197	130;136	173;152;191;170	174;171	110;125;113;103	121;128	215;218	161;164	94;103;107	244;271;262;253
1947	Kayengona C	Rundu	Kavango	Namibia	176;173	198;195	173;167;179	276;227;242;245	171	201;198	168;162;165;156	162;165	206	131;119;128	179;182	157;160	187;184	107;110;113;120;104;101	164;155	152;177;165;168	194;197;200;191	136;133	173;179;176;182	168;165;177;171	100;106;103;97;91	121;128;125	209	143;170;179;182;161;158	94;103;107;100	271
1955	Kayengona C	Rundu	Kavango	Namibia	173	189	164	242	171	198	165	165	212	128	179	157	184	123	155	158	197	158	179	171	103	125	215	161;164	103	241
1969	Kayengona C	Rundu	Kavango	Namibia	176	195;192	170;167	242	171	201;198	162;165;159	165	206;215	128	173;179	157;160	184;178	110;101	172;155	152	197	136;139;143	152;182;203	165;181;171	110;97	134;128;131;125	215	173;167;161	103	250
1970	Kayengona C	Rundu	Kavango	Namibia	173	204	167	258;242	174	201	165	162	206	131	179	157	187;184	107;110	155	177	200	136	176;182	184	116	121;140	209	167;158	100	262
1971	Kayengona C	Rundu	Kavango	Namibia	176	198;192	164	258	171;174	198	162;165	165	206	119;128	179	157	187	120;101	155	165	197	152	194;197	174;193	113	137	212	161;158;155	103;107;100	274
1992	Kayengona C	Rundu	Kavango	Namibia	173	195	158	227	174	201	165	165	206	128	179	160	184	113	155	152	197	136	203	171	113	134	218	143	103;100	268
1993	Kayengona C	Rundu	Kavango	Namibia	173	189	161	258	171	198	168	165	209	134	182	157	184	120	155	168	206	133	185	177	103	131	221	158	113	250
1997	Kayengona C	Rundu	Kavango	Namibia	176	192	179	258	174	198	165	162	206	134	182	160	184	120	164	189	197	136	176	193	106	125	212	167	103	253
2017	Kayengona C	Rundu	Kavango	Namibia	173	195	170	258	171	198	165	162	206	134	179	160	184	82;139	164	168	218	130	173	174	103	128	209	170	94	277
2019	Kayengona C	Rundu	Kavango	Namibia	173	195	173	242	174	201	162	165	215	125	179	157	187	110	155	189	206	139	200	171	85;125;88;91	121	209	121;170	100	241
2022	Kayengona C	Rundu	Kavango	Namibia	176	192	161	276	171	201	162	162	206	149	179	157	184	110	155	152	200	143	173	177	106	121	205	164	107	271
2076	Mashare C	Rundu	Kavango	Namibia	173	189	173	242	174	198	162	165	206	128	179	157	181	98;101	155	158	200	136	182	177	113;103	131	209	173	103	268
2131	Nkarapamwe C	Rundu	Kavango	Namibia	173	198	161	258	174	201	162	162	206	134	179	157	187	120	155	155	200	139	182	205	103	115	215	152	103	271
2135	Nkarapamwe C	Rundu	Kavango	Namibia	179;173	192	167	258;242	171;177	201	162	162	206	131;122	179	157;160	187	110;101	155	165;168	194	143;146	176	171	110;106;103	112	215;221;218	136;149;155	103;110	268;271;250;253
2138	Nkarapamwe C	Rundu	Kavango	Namibia	173	198;195	167;158	242	171	201;198	162;165	165	206;221	125;122	182	160	187;184	110	155	168	200	136;139	182	174;171	110;103	131;125	209;218	191;188;170;152;176;158;155	103;107	271
2146	Nkarapamwe C	Rundu	Kavango	Namibia	173	195	167;182	242	171	201;198	159	165	215	122	167	175	178	120	164	165	197	139;146	173;176	181	113	134;131	209;205;218	161	103	256
2148	Nkarapamwe C	Rundu	Kavango	Namibia	173	192	161	288	174	201	162	165	206	128	179	157	184	101	155	152	197	146	173	168	106	131	224	167	103	268
2156	Nkarapamwe C	Rundu	Kavango	Namibia	173	195	170	258	171	198	165	162	212	134	179	160	184	101	164	168	218	130	173	174	106;103	121	209	170	94	253
2157	Nkarapamwe C	Rundu	Kavango	Namibia	173	189	170	227	174	201	165	165	218	128	179	157	187	110	164	152	197	152	188;191	171	106	118;134;131	218	112;158	103	286
2158	Nkarapamwe C	Rundu	Kavango	Namibia	173	198	173	258	174	198	162	155	215	128	167	157	184	113	155	165	212	143	182	174;181	116	128	218	173	97	247
2170	Nkarapamwe C	Rundu	Kavango	Namibia	173	187	161	258	171;174	201;198	165	162	212	122	182	157	187	110	155	165	197;200	133	185	184;171	103	121;125	205	176	107	232
2172	Nkarapamwe C	Rundu	Kavango	Namibia	173	198	167	242	174	198	165	162	206	143	179	157	187	107;113;116	164	168	197	152;139	176	193	103	128;125	212	164	103	265
2173	Nkarapamwe C	Rundu	Kavango	Namibia	173	198;192	167;164	242	171;174	201;198	162;165	162	206	143;128;125	179	157	181	110;113;120;116	164;155	165	197	139;143	173;179;176	174;181	103	128;125	212;218	161;158;164	103	268;280;265
2174	Nkarapamwe C	Rundu	Kavango	Namibia	173	192	170	242	171	201	165	165	206	137	179	160	187	110	155	165	212	136	185	177	136;106	128	205	158	103	286
2183	Nkarapamwe C	Rundu	Kavango	Namibia	176	195	176	242	174	201	171	162	212	128	179	157	187	120	164	165	203	133	170	184	94	118	218	158	103	268
2192	Nkarapamwe C	Rundu	Kavango	Namibia	176	189	170;167;176;191	242	171;174	198	171;162	162;165	212;206	128;122	179;182	157;160	187	129;120;101	164;155	152;165;155	200;203;206	139;133;146	173;188;194	181;184	110;103	121;128;112	215;221;209	149	103;97	268;271;253
2195	Nkarapamwe C	Rundu	Kavango	Namibia	173	195;192	161;164	258;242	171	226;201	162	165	212;221;218;209	134;125	179	157	184	139;120;101	164;155	165	212	139;133;146	173;152;191;170	184;171	113;116	143;125	218	109;112;167	107	271;247
2196	Nkarapamwe C	Rundu	Kavango	Namibia	173	198	167	242	171	198	162	155	206	125	179	154	187	88	155	152	224	136	173	165	100	128	218	167	100	271
2201	Nkarapamwe C	Rundu	Kavango	Namibia	173	189	167;191	258	171	198	162	168	206	143	179	154	187	101	172	152;177	203	136	194	177	100	118	209	185;149	103;107	247
2209	Sauyemwa C	Rundu	Kavango	Namibia	173	202;198	170;179	227;242	171	201;198	165	162	206	125	179	157	187;184	110;91;120;101	155	171;155	194	136;143;146	173;179;176;170	174;168	100	121;131;125	221	167	103;100	268;271;274
2210	Sauyemwa C	Rundu	Kavango	Namibia	173	195	176	242	174	219	162	162	209	125	179	157	184	120	155	189	212	136	173	184	91	131	215	173	103	271
2211	Sauyemwa C	Rundu	Kavango	Namibia	173	198	173;164	242	174	201	162;165	165	224;203;194	125	179	157	184	110;101	155	165	200;212	139;143	173;170	177	110;113;116	128	205	167	103;100	268;271;253;256
2215	Sauyemwa C	Rundu	Kavango	Namibia	176;173	198;195;192	170;167;161	227;242	171	201;198	168;162;165;156	162	212;206;209	134;128;125;122	179;167	157	187;184	139;120;101	155	165;155	194;200;203;206	136;133;149	173;176;185	174;190;165;187;177	110;100;113;103	118;134;115;131;125	215;221;218	136;146;173;167;149;161;155;164	113;100;110	268;250;247;253;265
2216	Sauyemwa C	Rundu	Kavango	Namibia	176;173	198;192	170;167	227	171;174	201;198	162;159	162;165	212;206;218;215	125;122	179	157	187	110;120;101	164;155	152;155	194;197;191	139;143;146	173;176;188;191;161	171	97	118;134;131;125	209;205	167;161	103;107;100	286;268;253
2224	Sauyemwa C	Rundu	Kavango	Namibia	176	192	176	245	171	201	165	165	206	140	182	154	184	116	155	155	191	146	176	184	82;94;85;136;88;91	125	212	173	103;100	262
2226	Sauyemwa C	Rundu	Kavango	Namibia	173	198;195	173;167	258;242	171	198	159	162	206	128;122	179;182	160	187;184	110;113;120;104	155	165	215	136;143	173;179;191;185	174;171	116	128	209	170;149	103	268
2229	Sauyemwa C	Rundu	Kavango	Namibia	173	189;195	173;176	242	171	219;198	162;159	162;165	200;209	128;125	179;182	157	187;184	129;120	155	165;189	197	136	173;179;185	174	122;91	143;131	205	158	103;100	268
2230	Sauyemwa C	Rundu	Kavango	Namibia	173	189;195	173;185	258	171;174	198	168;162	165	206;197	125	179	160	184	126;110;120;116	155	168;155	200;203	139;143	185;158;161	177	110;113	134;125	209;205	173	103;100	232;229
2231	Sauyemwa C	Rundu	Kavango	Namibia	173	189	173	242	171	198	162	165	206;215	128	179	157	187;184	110;120	155	171;152;168	194	152;149	173;179	174;171	110;113	134;131	209;218	182	103;97	247
2232	Sauyemwa C	Rundu	Kavango	Namibia	173	195	164	258	171	201	162	165	212	128	179	157	184	120	164	168	203	133	173	177	113	143	209	109;112	107	247
2234	Sauyemwa C	Rundu	Kavango	Namibia	173	198	173	242	171	201	153	165	206	122	179	157	187	113	155	168	194	139	173;170	165	119	125	221	161;158	100;97	247
2236	Sauyemwa C	Rundu	Kavango	Namibia	176;173	198;195	170;176	258	171;174	201;198	162;156	162;165	206	140;122	179	157	184	129;110;120;101	164;155	152;177;165	197;209;212	139;146	179	174;187;177	100	115	212;218	167;164	107;110	268;271
2237	Sauyemwa C	Rundu	Kavango	Namibia	176;173	195;192	170;176;179	242;211	171	201	162;165	165	206	128	182	154	184	110;116	155	165;155	197	139	173;191	165	100	121;125	221	158	103;100	274
2246	Sauyemwa C	Rundu	Kavango	Namibia	176;173	189;195	170;161	276;227;258	171	198	162;159	162	206	122	179;182	157;160	187;184	110;101	164;155	165;168	218;197	152;146	179;170	174;168;181;150	100;116	121;128	205	161;158;155	103;107	277;253;259
2247	Sauyemwa C	Rundu	Kavango	Namibia	173	187	179	258	171	201	162	165	209	140	182	160	187	120	181;155	165	197	139	176	174	106	140;115	205	176	103;110	271
2250	Sauyemwa C	Rundu	Kavango	Namibia	173	192	173;161	258	171;174	198	162	162	221	122	179;167	157	184	91;101	164;155	168;155	194	130	179;176	190;187;177	100	134;128;125	221	167;161;164	94;100;97	253
2251	Sauyemwa C	Rundu	Kavango	Namibia	173	192	167	258	165;171	201	162	165	212	137	167	157	184	101	164	152	200	136	173	181	103	121	224	179	94	253
2252	Sauyemwa C	Rundu	Kavango	Namibia	173	189	170	258;242;273	174	198	156;159	152;165	212;218;203;209	128	179	157;160	187;184	98;101	155	171;152;168	194;203	127	176	184;177	106;113	134	212	149;161;164	103;107;100	256;259
2256	Sauyemwa C	Rundu	Kavango	Namibia	173	189	170;173	258	171	201;198	168	162;165	206	125;122	179;167	160	187;184	98;101	164	168	203	130;136	179;176	177	100;113	121;125	205	173;176;161	107;110;97	274
2258	Sauyemwa C	Rundu	Kavango	Namibia	173	192	173	258	165;171	198	162	162	221	122	167	157	184	101	164	168	194	130	179	190	100	125	221	164	97	253
2274	Sauyemwa C	Rundu	Kavango	Namibia	173	189	173;161	242;245	171;174	201;198	162;156;159	162;165	212;206	131;125	179;182	157	187;184	101	155	152;177;155	197;200;203	136;133	173;176;194;185	168;171	110;100;113;119;103	118;128;131	215	170;161;158	113;103;107;100	268;271;247;253;265
2293	Sauyemwa C	Rundu	Kavango	Namibia	173	198;189;195;192	167;161;164	242	171	201;198	162	155;162;165	212;206	125;122	179	154	187;184	88;91;120	164;155	152;165	224;197;203;206;212	136;133;146	173;176;185;170	165;171	100;113	118;143;128;131	218	112;167;152;161;158;164	113;103;107;100	244;232;268;271;250;253
2296	Sauyemwa C	Rundu	Kavango	Namibia	173	198;189;195;192	161;164	227;242	171	201;198	168;162;165	171;162;165	212;206;215	125	179;182;167	157	187;184	107;110;113;91;120;101	164;155	152;165;168;155	224;194;197;200;203;206;212	136;139;133;146	173;152;176;194;185;170;182	171	110;106;113;103;116	128;115	221;205;218	112;167;161;158	103;100	271
560	Mashare C	Rundu	Kavango	Namibia	173	198;189	167;161;164	227	171;174	201;198	162	165	206;197	134;125;122	179;182	157;154	187;184	110;113;91;120;104;101	164;155	158;152;165	197;200	152;139;143;146	173;176;191;194	137;181;184	110;100;106;113;119;103;116;91	134;121;128;131	215;205;218;224	167;161;158	103;107;100
561	Mashare C	Rundu	Kavango	Namibia	182	189	167	227	171	201	165	165	215	128	182	157	187	113	164	155	197	143	200	181	113	134	215	161	100
562	Mashare C	Rundu	Kavango	Namibia	173	202	161	258	171	201	165	165	212	122	179	160		113	164	155	197	136	155;152	181	113	121	221	179;158	103	271
563	Mashare C	Rundu	Kavango	Namibia	176;173	198;189;195;192	170;173;176	227;242	171;174	201;198	168;162;165;156	162;165	212;206;221;218;230;215	140;131;128;122	185;179;182	157;160	187;184	88;94;110;113;91;104;101	164;172;155	152;180;168;155	194;197;200;203;206	139;143;146;127	155;173;179;176;200;194;185	174;137;168;165;184;177;171	100;106;113;103;91	134;121;128;115;131;125	215;221;209;205;224		103;107;100;97	268;271;274;250;247;253;265;259
714	Rundu DH	Rundu	Kavango	Namibia	176;173	187;198;189;195;192	170;173;167;176;161;179;164	227;258;242	171;174	201;198	162;165;156	168;162;165	212;206;209	131;119;128;125;122	179;182	157;160	187;184	110;113;91;120	172;155	152;165;168;155	194;197;200;203;209	136;139;133;143;146	155;173;179;185;170;182;149;161	181;177;171	110;100;106;113;103;116	134;121;128;115;131;125	215;221;212;209;205;218		113;103;107;100;110	268;271;274;262;250;253;256
725	Ndama C	Rundu	Kavango	Namibia	173	198;189;195;192	167;161	242	171	201;198	168;171;162;159	165	212;206;221;218	125;122	179;182	157;160	187;184	123;94;91;104;101	164;155	152;165;168;155	194;197;200;191	136;146	173;179;170	174	106;113;103;116;91	121;128;131;125	215;209;205;218		103;107;100	268;271;247;253
1219	Mashare C	Rundu	Kavango	Namibia	176	195;192	176;161	242	171;185	198	162;165;156	165	206	128;125;122	185;157	157	187	88;110;91;104;101	155	171	191	143;146	206;152;176;188;185;182	193;165;184	110;106;103	118;149;125	218		94;107	268
1223	Mashare C	Rundu	Kavango	Namibia	173	192		211	171	204	162	165	212	128	179	157	187	126;129;120	155	152	218	139	188;191	174	106	118	218	164	103	271
1244	Mashare C	Rundu	Kavango	Namibia	176;173	208;187;198	167;179	242	171	201;198	162	165	212	125	182	157;160	187	126;110;101	164;155	155	194;197	152;136	173	140	119;103;116	128;115	221		107;100;97	268;277;262;247
1245	Mashare C	Rundu	Kavango	Namibia	173	198	185	242	171	198	162	165	230	122		160	184	98	155	168	209	136	170	181	110	128	209	164	97	274
1266	Mashare C	Rundu	Kavango	Namibia	173	198	161	227	171	198	162		212	125	179	157	184	101	181	177	206	139	188;191;170	190	103	128	218	173	107	274
1302	Mashare C	Rundu	Kavango	Namibia	176;173	195	170;173;167;176;179;164;188	227;242	171	201;198	168;162;165	162;165	206;197	134;140;128;125;122	179;182	160	190;187;184	123;88;94;107;98;129;110;113;91;120;104;116;85	164;155	152;168	224;215;194;197;200;203;191	139;143	173;179;176;185;182;167	168;165;171	100;113;103	134;121;131;125	212;209;205		94;103;107;100	292;271;274;250;247;253;256
1307	Sambyu HC	Rundu	Kavango	Namibia	173	189;195	173;176;164	242	171	198	162;165	168;165	212;206;215	128;122	157;179	157	187;184	123;110;120;101	164;155	171;158;177	194;197	136;139;149;158	173;152;179;176;200;191	174;184;171	110;106;103;116	134;121;128;131;125	215;209;205;218		94;103;107;100;97	244;241;280;277;250;247
1313	Rundu DH	Rundu	Kavango	Namibia	173	195	170;173;179	242	171		162;156	165	212;206;197;203	131;119;128	179	157	187;184	126;107;110;120;101	164;155	152;168	200;203;209	136	173;170	181;184;171	94;110;106;113;116	134;121;128;125	215;221;218	134;170;161;164	113;103;107;100	235;247;253;265
1314	Rundu DH	Rundu	Kavango	Namibia	173	198;189;195;192	170;173;167;176;164	242	171	201;198	162;165;156;159	168;165	212;206;203;215	119;128;125	179;182;167	157;160	187;184	126;110;113;91;120;101;116	164;155	177;165;168;189	194;197;200;203;206;209	136;139;143	173;152;179;185;170;182	187;181;184;171	94;110;100;106;113;122;116	134;121;128;125	215;221;212;218		113;100	268;271;262;250;247;253;265
1319	Sambyu HC	Rundu	Kavango	Namibia	173	195	167;164	242	174	219	162	168	206	143;146	157;179	154	184	94;110;113;104;85	155	177	215;218	152;155	173;179;176	184	113;116	128	218		103	262
1326	Mashare C	Rundu	Kavango	Namibia	173	195	164	261;258	165;171	198	162;156	162	212;206	128;122		157;160	187;184	110	164;155	168	200	136	173;152;182;203	165;171	110;100	128	215;209;205;218	130;143;140;155	107;100	250;247
1329	Mashare C	Rundu	Kavango	Namibia	173	198;189;195	161	227	171	198	162	162	218	128		166;175	184	88	140	152	224;194	155	173;176	165	113	128;125	205	161;158;155	100;97	271
1336	Rundu DH	Rundu	Kavango	Namibia	176;173	198;189;195		227;242	171;174	219;201;198	153;168;165;156	162;165	200;206	134;128;122	185;179;182;167	157	187;184	107;110;113;104;101	164;155	171;152;165;168	197;203;191	130;152;136	173;152;179;176;200;221	137;165;181;171	110;100;113;103;116	128;131;125	215;209;218	185;167;161;164	103;107;100	241
1342	Sambyu HC	Rundu	Kavango	Namibia	173	195	161	242	171;174	204;201	168;162	165	209	122		166	187	110	140;137	152	221	155	197	168;184	110;97	125	209;205	170;173;167;179;161;164	103	265
1348	Mashare C	Rundu	Kavango	Namibia	173	198;195		227;242	171	198	162;165	162;165	200;218	128;122	179	160;154;163	184	110;113	164;155	171;152;165	224;197;203	130;136;139	173;179	165;181	110;113	128;125	209;205;218	161;158	103;100	268;241;250;259
1351	Mashare C	Rundu	Kavango	Namibia	176	195	176	242	171	201;198	162	165	212;215	134	182	157;160	184	123;107;110;91;101	164;155	168;155	197;191	139	197	159;165;171	100;103	131;125	215;218		94	292;268;295
1359	Rundu DH	Rundu	Kavango	Namibia	176;173	187;198;189;195;192	170;173;167;161;164	227;242	171;174	201;198	162;165;156	168;162;165	212;206;209	119;128;122	179;167	157;160	187;184	126;107;98;110;113;91;120;104;101	164;172;155	152;165;155	194;197;200;209	136;139;133;146	155;173;152;179;176;185;170;182;149;161	177;171	110;100;106;116	121;115;125	215;212;209;205;218		113;107;100;110	268;262;250;253;256
1360	Rundu DH	Rundu	Kavango	Namibia	176;173	198;189;195;192	173;167;176;161;164	227;258;242	171;174	201;198	162;156		212;206	119;128;122	179;182;167	157	187;184	126;110;113;91;120;101	164;172;155	152;165;155	194;197;200;203;209	136;139	155;173;152;164;185;170;182;149;158;161;146	181;171	110;100;106	134;121;128;115;131;125	215;212;209;205;218	161;158;164	113;103;107;100;110	268;271;274;262;250;253
1366	Sambyu HC	Rundu	Kavango	Namibia	173	198;195	167;164	230;227	171	198	162		206	131;128;122	179	154	190;184	88;98;120;101;116	164;155	152;168	200;203	136;146	155;173;152;188;170	184;171	110;106;113	121;112;125	215;209;205	170;173;167;179;149;161;158;164	103;100;97	253
1372	Mashare C	Rundu	Kavango	Namibia	176;173	198;195	167;164	242	171	201;198	171;162;165;156		212;206;215	134;119;128	182	157;163	184	123;88;107;110;113;104;101	164;155	152;165	194;200	149;143;158	173;179;176;182	174;165;184;171	110;100;106;113	121;125	215;221;205;218	152;176;161;158	94;103;107	268;271;250;247;265
1375	Sambyu HC	Rundu	Kavango	Namibia	176;173	202	161	227;258;242	171	201	162;165	165	212	122	179	160	187;184	113	164;155	155	197		155;152	174;165;181	113	121	221	179;176;182;161;158;164	103	268;271;253
1484	Ndama C	Rundu	Kavango	Namibia	173	195;192	170	227;258;242		201;198	162;165	162	206	125;122	179;182	160	184	107;110;91;101	164;155	152;180;177;165;168;155	194;200;212	139;149;143	173;152;179;200;170	174;181;177	110;100;103	118;134;128	215;209;218	170;179;161;158	94;103;107;100	271;274;250;253;265;256
1504	Ndama C	Rundu	Kavango	Namibia	176;173	198;192	170;167;161	227;258	171;174	201;198	162	152;168	206;197;215;209	112;125;122	182;167	157	187	98;120;101;116	164;155	171;152;180;177;146;155	197;206;209	130;139;143;158	173;179;176	165;181	110;113;116	128;125	212;209;205	109;161;158;164		268;271;274
1506	Ndama C	Rundu	Kavango	Namibia	173	198	170	227	171	198	162	162		128;125	185;157	157;154	184	94;110;113;104	155	152	224	136;139;133	173;170	165	110;113	121;125	215	182	94;103;100;97	268
1522	Ndama C	Rundu	Kavango	Namibia	173	192	179;182	258	171;188		162	165	212	128;125	157;179	157	187	107;110;91;101	155	155	200	149	188;191;185	181	110;106	118;115	209	143;146	103;100	271
1524	Ndama C	Rundu	Kavango	Namibia	176	198	173	258	165;171	198	162	162	215	119	179	154	184	101	155	155	197	146	197	174	110		215	158	107	271
1529	Ndama C	Rundu	Kavango	Namibia	173	198;189	158	242	171	198	171;162	165	212;206	134;137;125;122	179;182	166;190;184;172	187;184	123;94;129;91	143;134;137;146;152	165;155;162	197;200;206		200	184;171	106;91	121;128;125	215;224	185;170;167;179;176;182;155	103;100	244;268;271;274;277;250;247;265
1531	Ndama C	Rundu	Kavango	Namibia	173		164	227	171	201;198	162	162;165	227	143;128;122	179	157;160	174;184	129;120;101	155	165;168;189	197	152;136	173;188;191;185	177;171	110;103;116	128;131	199;212;209	182;158;164	113;103;100	300;250;253
1532	Ndama C	Rundu	Kavango	Namibia	176;173	198	173;161	227;258	171	198	162	162	215	119	179;167	157	184	98;113;101	155	155	197	136;133;146	197	174	110;113	118;115;131		158;155	103	244;268;271;262;250;247;256
1534	Ndama C	Rundu	Kavango	Namibia	173;164	189;195	167;161;164	258;242	171;174	201;198	162;159	165	206;197	125;122	179;182;167	157;160	187;184	91;101	155	165;168;155	197;203	136;133;143;146	173;152;176;194;197	174;184;171	106;113	128;131	205	167;161;164		235;250;247;253
1544	Ndama C	Rundu	Kavango	Namibia	173	198	185	242	171		162;156	165	230	122	179	157;160	184	98	155	168	200;206;209;212	136	191;170;167	181;184;171	110;100;106;113;88	128	209	167;164	97	274
1550	Ndama C	Rundu	Kavango	Namibia	173	202;198;189;195	170;167;158	227	171;174	201;198	162;159	162;165	212;206;215	125;122	167	157	187;184	94;110;91;120;101	164;155	152;165;155	194;197;200;191	136;146	170	174;190;181;184;177	110;106;103;116	134;121;131;125	212;209;205		107;97	268;271;253
1552	Ndama C	Rundu	Kavango	Namibia	179;176	198;189;195	173;167;161;158	227;242	171;174	201;198	171;162	162	212;206;203;215	131;122		157;160	190;187;184	91;101	164;155	152;168;155	194;197;200;191	136;139;146	173;152;179;200;191;185;170;182;203	190;193;181;184;177;171	110;100;106;113;103;116;91	118;134;121;131;125	215;209;205;218	170;173;167;152;179;176;161;158;155;164	113;103;107;97	268;253
1553	Ndama C	Rundu	Kavango	Namibia	179;176;173	202;198;189;195;192	167;161;179;158	227;242	171	201;198	168;171;162;165	165	206;218;203;215;209	131;125;122	179;182;167	157;160	190;187;184	123;88;98;129;110;113;91;120;104;101	164;155	152;165;168;155;189;162	194;197;200;203;191;206;209	136;139;133;149;143;146	173;152;179;191;185;182	174;190;193;168;181;184;177;171	110;106;113;103;116;91	118;134;121;131	212;209;205;218		103;107;97	268;271;250;253;256
1654	Rundu DH	Rundu	Kavango	Namibia	173	189;192		242	171	201;198	162;165;156	165	212;206;221;215	128;122	185;179;182	157	184	94;110;113;91	164;155	152;165	197	152;139;143	173;176;194;197	174;165	110;106	140;128	215;212;209;218	146;167;152;149;158;155	103;100	268
1659	Rundu DH	Rundu	Kavango	Namibia	173	195	173	227	171	201	162	165	206	131;119;125	179	175	184	110;104	155	152	212	130	173;191	168	113	128;131		173	107	286
1676	Rundu DH	Rundu	Kavango	Namibia	182;176;173	202;198;189;192	170;173;167;158	258;242	171	201;198	153;162;165		206	131;128;122	179	157	187;184	123;91;120;104;101	164;155	165;189	194;197;203	152;136;139	173;179;176;170;182	190;187;181;184;177;140	110;100;103	128;125	199;221;212;209;205;218	118;167;161	103;107	268;271;250
1678	Rundu DH	Rundu	Kavango	Namibia	173	198;195	161;164	258	171	201	159	165	206	134;125	179	157;160	184	101	155	171;168	194	139	176	184	113	118		161	107	268
1681	Rundu DH	Rundu	Kavango	Namibia	173	208;187;198;189;192	170;173;167;161;158	242	171	201;198		165	212;221;215	137;125;122	179;182	160;163	190;187	98;110;91;104;101	164;155	152	197;200	152;139;143	173;152;176;188	174;147;171;150	100;106;91	118;128;115;137	227;221;205;218	158	103;100;110	244;262;250;247;253;265
1731	Rundu DH	Rundu	Kavango	Namibia	173	198		230	171	198	162	165	206	131	179	157;160;154	184	120	164	168	203	146	188;185	171	106	112	215	170;149	103;100	253
1737	Sambyu HC	Rundu	Kavango	Namibia	173	198;192	167;161;164	227	171;174	198	162;165;159	165	206;197	134;131;125	179;182	157;160;154	187;184	110;120;101	164;155	152	197;200	152;139;143;146	173;179;212;200;191;194;185	181;184;171;140	110;100;106;116	134;140;128;131	209;205;218;224	167;176;161	103;107;100;110
1744	Nkarapamwe C	Rundu	Kavango	Namibia	173	192	164	236	171	198	174	165	206	122	182	160	187	94;91	155	165	197	139	179	181	106	121;125	205	161		271
1754	Kaisosi C	Rundu	Kavango	Namibia	173	187;195	170;167;179	261	171;174	198	162;159		206;215	119;122	179;182	154	184	129;110;91	164;155	180;177;165	197;191;212	130;139	179;170	137;171	106;119;116	118;128	209	161;158;164	100;119	271
1757	Nkarapamwe C	Rundu	Kavango	Namibia	176;173	189;195	173;179	242	171	198	162;165	165	212;221;218;209	122	179;182	160	184	129;110	164	168;155	194;212	143;146	179;176	187;181;184	110;122;103	121;131	215;218	161	103
1759	Kaisosi C	Rundu	Kavango	Namibia	173	187;198;195	167;179	227;258	171;174	219;201;198	162	162;165;174	206;218;215;209	131;128;125	179	157	184	110;120	164;155	165;168	203	152;136;149;146	179;176;170	177	94;100;106;119;97	134;140;115;125	215;212	194;173;167;182;155	103;107;100
1760	Kaisosi C	Rundu	Kavango	Namibia	179;173	187;198;189;195	167;176;161;164	227;258;242	171;174	201;198	162;165;159	162;165;174	212;206;221;218;215;209	131;128;122	185;179;182	157;160	187;184	139;110;120;101	164;155	171;152;165;155	194;197;200;203;206	152;136;133;149;146	173;152;179;176;185;170	174;168;181;184;177;171	110;106;119;103;97	134;140;128;115;125	215;209;205	194;173;167;179;176;182;161;158;155;164	103;107;100
1761	Kaisosi C	Rundu	Kavango	Namibia	173	195	170	242	171	198	162	165	206	131	179	157	187	110	164	168	203	136	179	181	106	134		161	103;107	253
1764	Kaisosi C	Rundu	Kavango	Namibia	173	198;195;192	167;176;182;158	227;258;242	171	204;201;198	162	162;165	212;206;209	131;128;125;122	179;167	157;160	187;184	110;120;104;101;116	155	152;177;165;168;155	194	136;139;133;143;146;158	179;176;194;197;170;215	168;187;171;140	110;113;116;91	121;128;115;131		136;143;146;170;173;149;176;161;158;155	113;103;107	268
1765	Kaisosi C	Rundu	Kavango	Namibia	176;173	198;195	170	242	171	198	168;165	165	200		179;182;167	160	187;184	110;113;104	155	171;152;168	197;200;203	130;136	173;152;179;176;200;221	137;181;184;171	110;106;113;103;116	128;131;125	215;209;218	158;164	103;107;100	241
1766	Kaisosi C	Rundu	Kavango	Namibia	173	198;195	170;173;176	276;242;245	171	201;198	162;156	168;165	212;206	131;119;128	179;167	157	184	126;110;91;120;101;116	164;155	152	200;203;209	136;139	173;152;179;170	181;171	110;100;106;113;116	134;128;125		170;161;164	113;103;107;100	268;247;253;265
1772	Kaisosi C	Rundu	Kavango	Namibia	173	198;189;195	170;167	227;242	171;174	198	153;165;156	162;165	200;218;209	134;128;125;122	185;179;167	157	187;184	113	164;155	171;165;168	197;191;206	130;152;136;139	152;179;176;197	165;181;171	110;100;113;116	134;128;131	215;227;218	185;146;167;179;182;164	103
1773	Kaisosi C	Rundu	Kavango	Namibia	176;173	198;189;195	173;167;164	242	171	201;198	162;165;156	168;162;165	212;206	119;122	179;182	160;154;163	187;184	107;110;120;104;101	164;155	152;165;168	194;197;200;203;191	152;136;139;149;143;146	179;176;188	174;193;168;165;171	110;100;106;113;103	121;128;125		167;152;161;158;164	94;103;97	268;271;241;253
1775	Kaisosi C	Rundu	Kavango	Namibia	179;173	198;195	161	258;242	171	201;198	165;156	162;165	212;206	125;122	179	157	187;184	120;104;101	164;155	168;162	200;203	139	173;170	184	110;113;103	118;125		173;176;161;158;164	103;107	268;271
1777	Kaisosi C	Rundu	Kavango	Namibia	176;173	195	170;173;161	242	171	201;198	156	165	206;197	119	179	160	184	110;113	155	152;165;155	197;203	143;146	173;176;194;197	174;171	106;113;116	134;128		173;167;152;149;176;182;158;155;164	97	265
1778	Kaisosi C	Rundu	Kavango	Namibia	176;173	198;195;192	173;176;164	227;242;236	171;174	201;198	162;165	162;165	206;209	131;128;125	179	157;160	184	123;110;113;120;104;101	155	152;177;165;155	197;200	139;133;146	173;185;182	174;187;181;184	110;100;106;122	140;131;125		173;167;152;149;176;161;158;155;164	103;100	274;262;256
1781	Kaisosi C	Rundu	Kavango	Namibia	173	187	170;173;164;196	258	165;171		162	165	206	128	185	160	187	107;110;101	155	165	197;206	146	176	181	97	115	215;205	182	103;107	271;253
1783	Kaisosi C	Rundu	Kavango	Namibia	173	192	167	242	165	201	162	165	215	125	179	157	184	110	155	168	197	158	182	171	113	134	221	167	113
1785	Kaisosi C	Rundu	Kavango	Namibia	176;173	198;195;192	170;173;167;179	227;258;242	171;174	201;198	153;150;162;165;159	162;165	206;227;215	128;125;122	179;182;167	157;160;154	187;184	110;113;120;104;101	164;146;155	152;165;168;155	197;203;206	136;139	173;179;176	165;171	94;110;106;113	134;121;128;125	212;209;205	185;170;173;167;152;176;161;158;155;164	103;100
1786	Kaisosi C	Rundu	Kavango	Namibia	173	198	170;173	242	171	201;198	162;165	165	200;233	122	179	157	184	110;113;104;101	164;155	171;168	203;212	136;146	179;176	181;177	94;113	128;125	215;218	161	103
1794	Mashare C	Rundu	Kavango	Namibia	173	189;195;192	173;167	227;258	171	201;198	162	155	224;212;206;197;215	137;125	179;182;167	160;175	187	94;107;98;110;91;101	164;155	165	194;200;209	139	176;191	177;171;162	125;103;116;91	115;131	212;209;205;218	161;164	103;100
1795	Kaisosi C	Rundu	Kavango	Namibia	176;173	198;189;195	170;167;182	242;245	171;174	201;198	168;162;156	165	200;212;206;230;215	128;125;122	179;167	157;160	187;184	110;113;101	164;155	152;168;162	194;197	130;136	173;179;176;182	137;168;171	110;113;103	134;121;131;125	209;205	170;167;161;158	103;107
1796	Kaisosi C	Rundu	Kavango	Namibia	176;173	198;189	170;167	227;242	171;174	201;198	162;156	165	200;212;215	125	179	157;160	187;184	110	164;155	152;168;155;162	194;197	136;143	173;176;182	168;171	110;113	134;121;125	209;205	167;158	103;107;116
1798	Kaisosi C	Rundu	Kavango	Namibia	173	198	161	242	171	198	162	171	206	125	179	157	184	110	155	152	224;221;227	139	182	171	110	115	218	158	100
1802	Kaisosi C	Rundu	Kavango	Namibia	173	189;195	173;167;164	258;242	165;171;174	201;198	162;165	162;165	212;206	131;125;122	185;179	157	187	110;120	158	152;165;168;155	197;203;206	136;146	176	174;181;184;171;150	110;100	128;115	215;205;218	143;182;161;164	103
1806	Kaisosi C	Rundu	Kavango	Namibia	173	195	179	258	171	201	162	165	209	119	182	160	187	107	155	165	224	139	185;182	168	110;106	112		167	103;110	235;268;271;241;250;247;253;265;259
1808	Kaisosi C	Rundu	Kavango	Namibia	173	192	170	227	171	198	162	165	206	125	179	157	187;184	110;120	172;155	168	200	136	152;176;161	181	94;116	115;131;125	209	143;197;194;173;182;161;155	103;110
1810	Kaisosi C	Rundu	Kavango	Namibia	176;173	198;195;192	167;176	227	171;174	201;198	162;156;159	165	224;212;206	137;128	173;179;182;176	157;160	187;184;178	110;101	164;181;137;146;155	152;177	194;197	136;139;143	173;152;179;176;197;170	174;147;177;171;153	110;91	121;131;137;125		173;167;179;176;182;161;158;155;164	103;97	268;271;262;250;247;253;265
1811	Kaisosi C	Rundu	Kavango	Namibia	173	189	173;176	227;248	171	201;198	162;159	162;165	206	131;128;125;122	179	157;160	184	88;98;91;101	164;155	152	200	136;139		165;187	106;113;97	121;125	209;205;218	143;152;149;158	107;100;110	268;250
1819	Kaisosi C	Rundu	Kavango	Namibia	173	198	167	242	171	198	162	155	206	125	179	154	187	88	155	152	224	136	173	165;187	100	128	215;218	146;167	100
1822	Kaisosi C	Rundu	Kavango	Namibia	176;173	198;192	176;164	242	174	198	162;165	162;165	212	125	179;182	157;160	184	110;91;101	164;155	168	197	143;146	185;182	193;184;171	110;125;113;103	125	215;205	143;167;176	103;100
1823	Kaisosi C	Rundu	Kavango	Namibia	173	187	161	258	171	219;201	165	162	212	122	182	157	187	110;101	155	165	200	133	185	171	103	125	205	176	103;107
1827	Kaisosi C	Rundu	Kavango	Namibia	173	202;187;192	170;173;176;161;164	227;258;242	171;174	201;198	162;156;159	162;165	206;218	131;125;122	179	157;175	187;184	88;94;98;110;91;120;101	164;172;155	152;165	224;200;203	152;136;139;143	173;179;176;197;170	174;165	110;100;113;103;97;91	118;134;143;131	221;209;205;218	173;149;161;158;155;164	113;103;107;100;110
1830	Kaisosi C	Rundu	Kavango	Namibia	173	192	167	242	165	201	162	165	215	125	179	157	184	110	155	168	197	158	182	171	113	134	221	167	113;110
1832	Kaisosi C	Rundu	Kavango	Namibia	173	187;189;192;204	167;161	227;258	165;171	201;198	162;165;156	152;162;165	212	143	179;182	157	187;184	107;98;110;101	164;155	180;165;168;155	197;200;191	152;133	179;185;182	174;171	113;103	134;128;125	215;205	170;167;152;176;161	113;103;107
1834	Kaisosi C	Rundu	Kavango	Namibia	173	189;195;204	173;161;179;164	258;242	165;171;177	201;198	174;159	162;165	212;206;203;215	134;140;122	179;182	157;160	187;184	110;120	164;155	152;168;155	215;197;200	136;139;133;155	173;194	137	110;100;103;97	121;128;115;131	215;212;209;205;218	143;161;158;155	103;107
1837	Kaisosi C	Rundu	Kavango	Namibia	173	195	170	227	171	198	165	165	221	122	167	157	184	120	155	168	194	149	203	190;184	113	121		164	107	271
1841	Kaisosi C	Rundu	Kavango	Namibia	176;173	187;198;189;195;192	173;161	227;242;248;233	171	198	162;165;156	162;165	212;209	125;122	148;179	157	184	98;110;101	164;181	177;168;155	200;203;206;209	139	173;152;176;191;194;170	190;165;171	113;122;103;116	128;125		188;170;173;176;161;158	103;107;97	235;238;250;253
1842	Kaisosi C	Rundu	Kavango	Namibia	173	198;195	173;167	242	171	204;201	165	162;165	212;206	131;125	185;179	157	187	107;110;120	164;155	152;168;155	200;203;206	136;146	176	171;150	110;100;106	128;115	215;218	185;109;167;182;161;164	103;107
1844	Kaisosi C	Rundu	Kavango	Namibia	173	198;195;192	167;161;179;164	242	165;171;174	201;198	168;162	162;165	212;206;203;215	125;122	179	157	187;184	110;120;101	164;155	152;177	197;203	136;143;146	173;176;197;170;182;203	177;171	110;100;113	134;121;128;131	215;221;218	167;152;179;176;161;158;164	113;103;107;100
1846	Kaisosi C	Rundu	Kavango	Namibia	176;173	187;198;195;192;204	170;167;161	227;233	165;171;174	219;198	168;162;165	168;162;165	212;206;215;209	125;122	173;179;182	157;160	187;184	98;110;113;120;104;101	164;155	152;165;168;143	197;203;191;206	130;152;136;139;133;149;143;158	173;152;179;176;185;197;170;182	165;171	100;113;103;97;91	134;121;128;115;131;125	215;221;205;218	188;170;173;167;152;179;149;176;161;158	113;103;107;100;110
1849	Kaisosi C	Rundu	Kavango	Namibia	176;173	198	167;176;161	227;242	165;174	204;201;198	162;159	165	212;197;215	134;131;125;122	179;182	157	187;184		164;155	152;168	215;197;200;203	136;139;143;158	173;152;176;191;170;182;203	171;140	100;106;113;97	128;131;125	221;209;205;218	173;167;152;149;161;158;164	113;107;100;110;97	235;241;250;247;253
1851	Sambyu HC	Rundu	Kavango	Namibia	176;173	202;198;189;195;192	170;167;176	227;242;245	171;174	201;198	162;165;159	162;165	212;206;218;215	128;125;122	185;179	157;160	187;184	129;110;91;120;101	164;137;146;155	152;177;165;155	197;203;206;212	136;139;143	206;179;176;191;185;197;170;182	174;187;181;184;177;171	94;110;106;113;119;103;116	118;128;131;125		115;173;176;182;161;158;155;164	103;107;100	268;271;274
1861	Sambyu HC	Rundu	Kavango	Namibia	173	192	167	258;242	174	198	162	162;165	212	131	185;179	157;160	187	120	164	155	221;206	149;155	176;170	190	100;106	121;115		152;176;158	103;100	274
1864	Sambyu HC	Rundu	Kavango	Namibia	173	198	164	230	171	198	162	165	206	131	179	154	184	120	164	168	203	146	188	184;171	106	112	215	170	103
1865	Sambyu HC	Rundu	Kavango	Namibia	173	198	173;176;161	227	171	201;198	162	165	206;218	128;125	179;167	160	184;193	88;91	155	152;165	224;221;197;200	152;139;146	173;176;182	165;171;150	113;116	128;125	205	158;155	103;100
1873	Sambyu HC	Rundu	Kavango	Namibia	182	189	167	227	171	201	165	165	215	128	182	157	187	113	164	155	197	143	200	181	113	134	215	161	100
1883	Sambyu HC	Rundu	Kavango	Namibia	173		170;176	227	171	198	162	162	218	128	179	160	184	88	155	152	224	136;139	173;170	165	113	125	205	158;155	103;100	271
1885	Sambyu HC	Rundu	Kavango	Namibia	173	195	167	227	171	201	162	165	206	128	167	157	187	113	164	152	224;227	133	194	165	110	137	215	167	100;97
1895	Sambyu HC	Rundu	Kavango	Namibia	173	195	179	258;242	171	198	165	165	212	134;140	179	157	187;184	110;101	155	177	206	139	179;182	177	100	125	215;218	155	103;107
1896	Sambyu HC	Rundu	Kavango	Namibia	173	202;195	173;167	242	171	201	162	168;165	212	128	179	154	187	120;101	155	177	209	139	179;200	184	94;116	128;125		170;152;161	103	247
1904	Sambyu HC	Rundu	Kavango	Namibia	173	192	167	242	171	198	162	162	215	131	179	157	184	101	155	168	203	136	179;182	174	94;110	134	230	167	103;100
1917	Sambyu HC	Rundu	Kavango	Namibia	173	202;198;189;195;192	170;167;161	227;258;214	171	201;198	162;165	165	212;206	131;128;125;122	185;179;182;167	160	174;184;193	110;104;101	164;155	165;168	194;197;200;206;212	152;139;143	173;179;191	177;171	110;100;113;116	134;128;131;125		146;170;167;152;161;158;155;164	94;103;100	271;250;253
1928	Sambyu HC	Rundu	Kavango	Namibia	173	189	170	242	174	198	165;156	165	230	122	185;179;182	157;160	187	101	155	152;189	197;200	139	200	174	106;122	115	205	167	103;100
1930	Sambyu HC	Rundu	Kavango	Namibia	173	198	176;161	227	171	198	162	162;165	218	128	179	160	184	88	155	152	224	139	173	165	113	125	205	161;158;155	103;100;97
1944	Kayengona C	Rundu	Kavango	Namibia	173	202;195	170;158	242	165;171;174	201;198	162;165	162;165	212;206;221;215	131;128;122	167	157;160	187;184	123;98;110;120;101	164;155	152;165;168;155	194;197;200	130;136;139	173;152;191;170;182	174;187;171	110;125;113;103	121;128	215;221;205;218	161	94;103;107
1946	Kayengona C	Rundu	Kavango	Namibia	176;164	202;198;195;192	173;167;161	227;242	171;174	204;201;198	162	165	206;197	134;112;131;122	179	157;160	187;184	110;113;120;104;101	172;155	177;165	197;200;203	139;133;143;146;155	173;152;176;194;197;182	174;187;184;177;171	125;113;116	134;121;128;131		170;167;149;161;158;155	113;97	271;262;250;253
1950	Kayengona C	Rundu	Kavango	Namibia	173	195	173	227;242	171	201	168	162	212;206	112	179;182	157;163	184	110	164;155	155		143	179	165	106	121;128	205	173;179;176;158;155	103	274;277
1951	Kayengona C	Rundu	Kavango	Namibia	173	189;195	176;164	242	171	198	162;165	165	212	125;122	179	157	187;184	123;120;104;101	164;155	158	197	143;158	179;191	171	103	125		167;161;164	103	274;262
1952	Kayengona C	Rundu	Kavango	Namibia	173	198	170	242	171	201	156	162	209	125	179	157	184	120	155	168	206	136	173	177	103	115		158	103	253
1956	Kayengona C	Rundu	Kavango	Namibia	176;173	198;192	167;161	276;242;245	171	201;198	162	155;162	206	128;125	179	157;154	187;184	88;107;110;91	155	152	224;200	136;143	173	165;177	100;106	121;128	205;218	170;167;161;164	107;100
1957	Ndama C	Rundu	Kavango	Namibia	176;173	189;195;192	173	227;258	171	201;198	162;165	165	215	122	179	157	187;184	120;101	155	165;155	200	136;146	173;185	177;171	106;113	128		173;161;155	103;100	274
1958	Sambyu HC	Rundu	Kavango	Namibia	176;173	198;189;195	170;167;164	258;242	171;174	204;201;198	150	165	212;227;215;209	134;137;128	185;179;167	157;160	187;184	94;113;120;101	172;155	152;180;168	194;197;203;209	152;133;143	206;176;194;185;197;215	174;168;171	113;116	118;112;131;125	209;205	185;170;167;179;176;182;161;158;164	103;100
1960	Sambyu HC	Rundu	Kavango	Namibia	173	198	167;161	227	171;174	198	165	165	206;197	134;122	179	157	187	101	155	152	197;200	152;139	188;191	187;181;184	82;85;116	121;128	218;224	167;161	103
1964	Sambyu HC	Rundu	Kavango	Namibia	176;173	195;192	158	242	171	198	162	165	206;197	134;140;122	182	157;154	187	120	155	162	215	139;146	173	171	116	121;125	212;209	161;158	113;103;107
1966	Kayengona C	Rundu	Kavango	Namibia	173	198	179	273	171	201	165	165	206	137	179	157	184	101	155	152	197	146	185	181	85	140	227	170	100
1968	Kayengona C	Rundu	Kavango	Namibia	173	195	170	242	171	198	162	165	209	122	179	160	187	107;110	155	152	197	149	179;215	174	113	125	212	161;158	103;100
1972	Kayengona C	Rundu	Kavango	Namibia	176;173	198;195	170;173;167;161	227;258	171	198	162;165;156	162	206;215	134;119	167		184	139;113	164;155	177;168;155	218;194;197	130;136;139;146	173;191;194;197;170	174;177	110;103	128;115	215;209	170;152;161;158;164	94;107;100;97	271;277;247;265
1974	Kayengona C	Rundu	Kavango	Namibia	176	195;192	173;161	242	171	201	162;156	165	197	134;137;131	179	160	184	113	155	165	197	143	173	174	113;116	121		155;164	103	253
1976	Kayengona C	Rundu	Kavango	Namibia	176;173	195	176;179	258	171	198	165;156	162;165	212	125	179	157	187;184	120;101	164	168	200	139;133	173	181	110;100;97	128	215;212;209;218	173	103;107
1977	Kayengona C	Rundu	Kavango	Namibia	173	195	173	242	174	201;198	162	162;165	206;197	116	179;182	157;175	187;184	94;110;104;101	155	152;165	212	146	173;176;182	181;177	110;85;106	128;125	215;209	167;161;158;164	103;107;100
1978	Kayengona C	Rundu	Kavango	Namibia	173	202	158	242	165	198	162	162	221	131	167	160	187	123;120	155	152	197	136	173	168;187;171	110	128	215;212	161	107
1984	Sambyu HC	Rundu	Kavango	Namibia	176;173	202;187;198;195;192	173;167;176;161;158	261;227;258;242	171;174;162	204;201;198	153;168;162;165;156	168;165	212;206;197;215	134;112;116;131;128;125;122	179;182	157;160	187;184	123;94;129;110;113;91;120;101	164;172;155	152;177;165;155;162	197;200;191;212	136;139;143;146	173;179;176;200;191;197;170	174;137;165;171	110;100;106;113;116	121;128;115;131;125		118;170;173;167;161;158;164	103;107;100;110	253
1985	Sambyu HC	Rundu	Kavango	Namibia	173	195;192	161;164	227;242	174	204;201;198	168;162	165	212	122	179;182	157;160	187	101	155	152	197	136;158	179;176;197	171	106	115		176	103;100	247
1988	Kayengona C	Rundu	Kavango	Namibia	173	195;192	170;173	258	171	198	165	162;165	212;206	134;128;122	182	157;160	184	120;101	164	168;155	218	130;152	173	174	113;103	121;128	212;209;218	188	94;103
1990	Kayengona C	Rundu	Kavango	Namibia	173	189;192	164	242	174	201	156	165	206	128	179	157	184	120	155	168	206	139	173	177	100	134	215	173	103;100
1991	Kayengona C	Rundu	Kavango	Namibia	173	189	161	258	171	198	168	165	206	122	179;182	157	184	120	155	168	206	133	185	177	103	143	218	158	113;110
1994	Kayengona C	Rundu	Kavango	Namibia	173	195	164	258;242	171	223;226;204;201;198	162	165	212;221;218;209	134;128	179	157	187	139;101	155	165;168	197;203;212	133	173;152;191;170	184;177;171	113;116	143;125		112;167	103;107	244;232;286;235;241;250;247;253
1996	Kayengona C	Rundu	Kavango	Namibia	173	195;192	173	242	174	201	162	162	197	116	179	175	187	110	155	165	212	146	176	177	110	128	215	161	103
2000	Kayengona C	Rundu	Kavango	Namibia	176	192	179;164	258	171;174	198	162;165	162;165	206;197	134;125	182	157;160	187;184	91;120	164;155	165;189	197	136;146	176	174;193;199	106;91	128;125	212	167	103
2002	Sambyu HC	Rundu	Kavango	Namibia	173;185	198;192	170;167;179;164	227;258;242	171	201;198	162;165;156	162;165	212;206	134;116;131;125	179;182	157	187;184	107;110;101	164;172;146;155	165;189	197;203;191	136;139	173;179;176;170;182	174;171	110;106;103;97	128;131;125		161;158	103;107	247
2005	Sambyu HC	Rundu	Kavango	Namibia	173	198;195	161	227	171	198	162	162	212;221	125	179;182	157	184	120;101	164;181	177	203	139	176;191	177	110	128;131	218	173;179;182	103;107;100
2006	Sambyu HC	Rundu	Kavango	Namibia	173	195	170	227	171	201	162	165	215	125	179	157	187	120	172	152	200	149	191	193	103	115		167	103	268
2007	Sambyu HC	Rundu	Kavango	Namibia	173	195	167	258	171	198	168	165	212	122	179	157	187	110	164	152	200	139	200	171	91	121	224	158	103;100
2009	Sambyu HC	Rundu	Kavango	Namibia	176	195	170	261	171	198	162		212	128	182	157	187	113	155	158;155	197	136	179	165	100;97	121	215	173;176;161	94;97	274
2014	Kayengona C	Rundu	Kavango	Namibia	173	195	173	242	174	201	162	162	197	137	179	175	187	110	155	165	212	146	176	177	110	128	209	161;158		271
2015	Kayengona C	Rundu	Kavango	Namibia	176;173	198	167	258	171	223;226;201	162	162;165	212;206	128;122	179;182	157;160	187;184	110	155	152	191;209	136;143	173	165;184	110;106	140;128	205	170;167	103;100
2016	Kayengona C	Rundu	Kavango	Namibia	173	192	167	258	171	198	162	162	221	125	179	157	187	120	155	168	194	158	176	190	110	121		158	113;110	262
2020	Kayengona C	Rundu	Kavango	Namibia	176	192	179	258	174	198	165	162	206	134	182	160	184	120	164	189	197	136	176	193	106	125	212	167;164	103
2023	Kayengona C	Rundu	Kavango	Namibia	173	198;195	170;173;164	258;242	171;174	201;198	162;165	162;165	206;197	128;125;122	179;182	157;160	187;184	101	164;155	168;155;183	197;203	130;139	173;170;182	168;187;181;162	100;113	121;128	221;212;218	136;188;149;182;161;155	94;103
2025	Sambyu HC	Rundu	Kavango	Namibia	176;173	198;189;195;192	170;173;167;176;182;158	227;258;242	171	204;201;198	168;162;165;156	162;165	212;206;209	128;125;122	179;182;167	157;160;163	190;187;184	110;120;104;101	164;155	152;177;165;168;155	194;200;203;191;206	136;139;133	173;179;176;197;170;215;218;221	174;168;187;177;171	113;119;116;91	121;128;131		143;109;146;170;173;167;152;149;161;158;155	113;103;107;100	241
2027	Sambyu HC	Rundu	Kavango	Namibia	173	195	182	242	171	198	162	171	206	134	182	154	187	110	164	152	200	146	188	171	110	140		161	100	286
2056	Mashare C	Rundu	Kavango	Namibia	176	192	179	242	171	201	162	165	206	122	179	160	187	110	155	171	203	136	194	184	113	131	212	176	103
2133	Nkarapamwe C	Rundu	Kavango	Namibia	176;173	198;195	176;158	242	171	201	165;156	162;165	221	134;137	179	157;160	184	101	164	168	200	143	182	184	103;97	131	221;212	155	103;97
2137	Nkarapamwe C	Rundu	Kavango	Namibia	173	195	167	273	174	198	165	165	206	125	179	157		113	164	152	197	139	176	184	110	128	209	158	100	271
2139	Nkarapamwe C	Rundu	Kavango	Namibia	173	189	173	242	171	201	165	165	206	131;119	179;167	157	187;184	101	164	168	206	136	173;152;179	174	103	121;128		161;164	103	274
2151	Nkarapamwe C	Rundu	Kavango	Namibia	173	202	167	242	171	201	165	165	206	125	179	157	184	120	134	165	197	143	194	184	110	146		136;134	103	268
2154	Nkarapamwe C	Rundu	Kavango	Namibia	173	192	173	227	174	198	165	165	221	128	179	157	184	110		152	197	130	173;203	187;171	103	131	218	149	107	271
2159	Nkarapamwe C	Rundu	Kavango	Namibia	179	192	176	227	171	201;198	162;159	165	206	128	179	157	187	104;101	164;155	152;155	191	139	197	190	110;113	134;131	212	161;164	103
2171	Nkarapamwe C	Rundu	Kavango	Namibia	176	192	179	242	174	198	162	165	206	134;125;122	167	157	184	104;101	155	165	197;212	136	173	187	106;116	121;131;125		161	103	286
2175	Nkarapamwe C	Rundu	Kavango	Namibia	173	192	167	258	171	198	162	165	215	125	179	157	184	107;110	155	152	200	139	173	171	106	128	218	170	103
2176	Nkarapamwe C	Rundu	Kavango	Namibia	173	195	173	242		201	165	165	215	128	185	157	184	107;110	155	168	197	143	185	174	106	134	209	109;182	100	274
2177	Nkarapamwe C	Rundu	Kavango	Namibia	176;173	198;195	173;182	242	174	201;198	168;156	165	206	128;122	179;182	160	187	101	164;155	177;168	200;203	130;139;149	173;170	177;162	110;113	118;125	209	164	103;107
2181	Nkarapamwe C	Rundu	Kavango	Namibia	179;173	198	173;164	242	174	201;198	165;156	162;165	215	128	179	157	187	110;101	164	152	203	139	185	171	94;103	134;131	209	167;164	103
2194	Nkarapamwe C	Rundu	Kavango	Namibia	176;173	189;195	173;182	242	171	219	168;162	165	224;221;230;215	125;122	179;182	157;160	187	110;101	155	168;140	197	130;143	173	171	110	128;131		185;173	103;107	268
2198	Nkarapamwe C	Rundu	Kavango	Namibia	173	195	176	258		219	162	165	209	128	179	157	187	82;129	155	177	218	136	173	184	100	131	218	152	103	274
2202	Nkarapamwe C	Rundu	Kavango	Namibia	173	189;195	173;164	258	174	198	162	162;165	206;209	119;125;122	179	157	187	132;129;110;101	164;155	152;165	197;212	136;146	173	177	106;103;91	134;131	215;209;205	173	100
2205	Nkarapamwe C	Rundu	Kavango	Namibia	173	192	161	288	174	201	162	165	206	128	179		184	101	155	152	197	139;146	173	168	106	128;131	224	167	103	268
2214	Sauyemwa C	Rundu	Kavango	Namibia	173	198;189;195	170;173	242	171	201;198	165;156;159	165	206	128;122	185;179;182	157;160	187;184	94;110;113;91;104;101	164;155	165;155	215;194;197;200	136;139;143;146	173;179;200;191;194;185	174;168	100;122;116	128;115;125	221;209;205		103;100	268;271
2225	Sauyemwa C	Rundu	Kavango	Namibia	173	195	164	242	165;171	201	162	165	206	122	179	157	187	98	164	165	209	133	179	165	103	115	215	158		274
2227	Sauyemwa C	Rundu	Kavango	Namibia	173	198;195	173	242	174	198	165;156	165	215	128;125;122	179;182	157;154	187;184	98;101	164;155	155	197;209	130	179;182		122	125	218	173	103;107;100	286
2233	Sauyemwa C	Rundu	Kavango	Namibia	173	198;195	170;173	258	171	198	165	162;165	212;206	134;122	179;182	160	184	139;113;101	164;155	168	218;200	130;149		174	106	121;128	209	170;152	94	277
2255	Sauyemwa C	Rundu	Kavango	Namibia	173	192	167	258	171	204	162	162	206	125	179	157	187	110;101	155	168	203	130;158		181	110	121;115	215	161;164	100	262
2260	Sauyemwa C	Rundu	Kavango	Namibia	173	192	176	242		198	168	165	209	143	182	157	178	120	155	168	194	146	185	181	119	128	215	170	107	241
2261	Sauyemwa C	Rundu	Kavango	Namibia	173	195	170;167;161	242;245	171;174	201;198	162;165;159	165	206;221;215	125;122	179;182	157;160	187;184	126;88;110;116	164;155	152;165	218;197;203	152;139;146		171	100;113;116	128;131	209;205;218	152;161;158;155	103;107;100	268;274
2270	Sauyemwa C	Rundu	Kavango	Namibia	173	195	167	245	174	201	162	165	221	122	182	160	187	110	155	152	203	146	185	171	113	128	218	152		268
2280	Sauyemwa C	Rundu	Kavango	Namibia	173	198;189;195;192	167;161	227;242	171	201;198	162;165;156;159	162;165	212;206;215	131;128;125;122	179;167	157;160	187;184	110;113;91;101	164;155	177;168;155	194;197;200;203	136;139;133;143;155		168;165;171	110;100;119;103;116	134;121;128;115;131;125	215;209;205;218	188;112;167;161;164	113;103;107	268;271
2281	Sauyemwa C	Rundu	Kavango	Namibia	173	198;189;195;192	167;161	227;242	171	198	162;165;156;159	165	206;215	134;131;128;125;122	179;167	157;160	184	107;98;110;113;91;120;101;116	164;155	152;168;155	197;200;203;206	136;139;133;143;146;155	173;194	165;177;171	110;100;113;119;103;116	134;121;143;128;115;131;125	215;221;209;205;218	188;112;167;152;161;158;164	113;103;107;100
2283	Sauyemwa C	Rundu	Kavango	Namibia	173	189	161	258		198	168	165	209	134;125	179;182	157	184	91;120	152;155	168	206	133	185	177	103	131	221	112;158	113;103;107;100;110	250
2284	Sauyemwa C	Rundu	Kavango	Namibia	176	195;192	161;164		171	201	162	165	212	134;125	179;182	157	184	139;120;101	164;152;155	168	212	133;146	173;152;170	184;177;171	113	143	218	109;112	103;107	247
2295	Sauyemwa C	Rundu	Kavango	Namibia	173	198;189	170;161	227	165;171	201;198	165	162	206	125	179	157	187;184	91	155	171;168;155	194;203	136	176	168		131	221	167;158	103;107;100	271
2298	Sauyemwa C	Rundu	Kavango	Namibia	176;173	195;192	164;182	242		201;198	162;165	162;165	206;215	143;146;128;125	179	157	187	107;110;113;120;101;116	164;155	168;155	200;212	136;139	173;152;176;197	181	110;106	128	215;221;218	161;158	103;100	265
2326	Kayengona C	Rundu	Kavango	Namibia	176;173	208;202;195;192	170;179;158	227;258;242;245	171;174	201;198	162;165	162	212;206;221;215	112;122	179;167	157;160	187;184	123;126;129;110;113;120	164;172;155	168;155;189	194;197;200	152;136;139;149	152;146	174;177	110;125;106;113;91	121;128;125	205		94;103;107	238;271;262;250;253
2361	Kayengona C	Rundu	Kavango	Namibia	173	208;195	170	242;245	171	198	162	162	212;221	128;122	182;167	157;160	187;184	120	155	168	194	130;139	152;146	174;190;150	125	121	205		94;103;100	271
783	Sambyu HC	Rundu	Kavango	Namibia	173	198		242	174	198	171	162	206	143	179	160	187	101		168	197	152	197	193	100	128	212	161	103	286
793	Sambyu HC	Rundu	Kavango	Namibia	173	198		242	174	198	171	162	206	143	179	160	187	101		168	197	152	197	193;165	100	128	212	161	103;100	286
800	Sambyu HC	Rundu	Kavango	Namibia	173	198		230	171	198	162;165;159	165	206	131;125	179	154	184	120;101		168	162;200;203	149;146	188;185	171	106	134;121;128;112;125	215;199	158	103;107;100	250;253
813	Nkarapamwe C	Rundu	Kavango	Namibia	176	192		242	171	201	162;159	165	206	122	179	160	187	110		171	203	136	194	184	113	131	212	164	103;100	262
823	Sambyu HC	Rundu	Kavango	Namibia	173	198;189		230;227	171;174	198	162	162;165	206;218	131;128	179;167	157;154	184	120		177;168	203;206	139;146	176;188;185	171	100;106	125	215	158	103;100	250;253
851	Sambyu HC	Rundu	Kavango	Namibia	182;173	189		242	171	201	162;165	162	215	128;125	179;182	157;160	187	101		152;165	212	143	194;182	174	103	134;128;125	215	149;101	103;100	277
860	Sambyu HC	Rundu	Kavango	Namibia	173	198		230	171	198	162	165	206	131	179	154	184	120		168	200;203	146	188;185	171	106	112	215	158	103;100	253
1247	Mashare C	Rundu	Kavango	Namibia	173	198	158	227		198	162	162;165	212;209	125	179	166;160	184	98;110;101	140;152	177;168;155	203;191;206;209		176;188;191;170	190;181;177;171	110;103	128;131;125	205;218	134;170;173	103;107;97	274;277
1312	Rundu DH	Rundu	Kavango	Namibia	173	189;192		242	171		168;162	165	206	131;128	179;182	157	187;184	110	155	168;155	203;206	143	176;182	190;177	113;103	121;125	209	143;161;158	103	271
1320	Mashare C	Rundu	Kavango	Namibia	176;173	187;189	170	227;242	165;171		162	162;165	212;206	116;137	167	157;160		94;98;101	155	165;155	200;203	152;146	173;152	187;184	110;103	128	215	167	103;107	268;265
1331	Sambyu HC	Rundu	Kavango	Namibia	173	198;189;195		227;242	171;174	201;198	162	162	212;218;209	131;128;122	179	160	184	126;88;91;101	164;172;155	158;152;155	224;221;200	136;139	173;179;176;185	159;165;171	110;100;113;103	121;125	205		103;107;97	244;232;235;289;271;241;274;280;250;247;265
1343	Sambyu HC	Rundu	Kavango	Namibia	173	198;195	161;158	227;242	171;174		162	168;162;165	206;209	146;131;128;122		166;175	184	88;110;113;104	134;140;137;146;152;155	152;177;165	221;218;194	155	179	174;184	110;103;116;97	128;125	215;221;209;205;218	170;167;179;182;161;158;155	103;100;97	244;268;229;262;247;265
1374	Mashare C	Rundu	Kavango	Namibia	173	198		242	171	198	162	165	230	122	179	157;160	184	98;104	155	168	209	136	170	181	110	121;128	209		97	274
1376	Sambyu HC	Rundu	Kavango	Namibia		198	170	242	171	198	162		212;209	128	179	157	187;184	98;101	155	152	197;209;212	136	173;179;188;191;170	181;171	110;100	131	215	158	113;100;110;97	265
1521	Ndama C	Rundu	Kavango	Namibia	173	189		227	171	201	162	165		125	179	157	187	101	164	208;155	203	127	179	165	116	115	205	173	94;107	247
1527	Ndama C	Rundu	Kavango	Namibia	173	198;189	170;167	242	171	201	162	165	212	131	179;182	160	187;184	123;120;101	164;155	177;165	194;191	136	173;179;191;194	190;187	94;106	121;115		161;158;164		268
1554	Ndama C	Rundu	Kavango	Namibia	173	202	161	258	171		165	165	212;215	122	179;182	157	184	110;113	164;155	155	197;191	136	155;152	181	94;113	121;131	221		103;97	271
1556	Ndama C	Rundu	Kavango	Namibia		195	170;173;179	242	171	201;198	162		212;203	128;122	185;179;182	157	187;184	91;101	155	152;177	200;203	139	206;209;179;188;200;197;182;203	190;168;177	103;97	134;131;125	209	170;167	107	268;271;253;265
1658	Rundu DH	Rundu	Kavango	Namibia		198	164	242	174	201	162		212	131	179	157	187	82;139	155	152	197	139	173;170	171	110	125	205	170	103;100	271
1679	Rundu DH	Rundu	Kavango	Namibia	170;173	208;187;189;195;192	158;155	261;227;242		198	162;156;159	162;165	212;206;221;215;209	137;122	185;179;182	166;175;169;172	184	123;110;120;101	140;149;137;146;152	152;165;155	221;194;197;200;191	155	173;179;176	174;147;168;187;171	110;106;113;88;91	121;128;115;137;125	215;227;212;209;205;218		103;107;110	268;271;247
1705	Rundu DH	Rundu	Kavango	Namibia	173	189		242	174	201	159	165	218	125	185	160		82;129	146	168	197	143	185	171	113	137	205	188;164	100	268
1726	Rundu DH	Rundu	Kavango	Namibia	176	195		242	171	198	159	165	209	128	173	160	184;181	107;98	155	152	197	143	173;185	174;168;184;171	110;106;113;116	121;125	209		103	268;265
1728	Rundu DH	Rundu	Kavango	Namibia	176;173	195;192	170;167;161;185	227;242	171;174		168;162;156;159	168;165	224;212;206;221;215;209	140;137;128;122		157;160	190;187;178	110	164;181;155	152;177;168	194;197;200;203;191	139;143;146	173;152;176;194;197;170;161	143;147;168;177;171	110;100;106;113;91	134;121;131;137;125	209;205;224	170;173;167;152;179;176;161;158;155;164	103;107	268;271;274;262;250;247;265
1774	Kaisosi C	Rundu	Kavango	Namibia	173	198	170	242	171		165	165	200	122	179	160	184	113	155	171	203	136	179	181	113	128	218	161;158	103
1782	Kaisosi C	Rundu	Kavango	Namibia	173	189;195	164	258;242	165;171;174	198	162	162;165	212;206	131;128;125;122	185;179	157;160		110;120;101	155	152;155	197	136;146	173;152;176	171	110	128;115	215;209;205	130;143;140;149	103;107;100
1788	Kaisosi C	Rundu	Kavango	Namibia	173	198	161	227		198	162;156	152	212	119;122	179	157	184	110	155	155	162;194;206;209;212	139	170	187	110;116;91	118;121;128;112;131;125	212	143;146;134	110
1797	Kaisosi C	Rundu	Kavango	Namibia	173	198	161;185	227;242	171	226;198	162;159	162;165		125	179	157;160	184	113;101	164;155	177;168;155	206;209	136;139	188;191	190;193;181	100;113;116	115		173;167;101;161;158;155;164	103;107;97	268
1812	Kaisosi C	Rundu	Kavango	Namibia	173	208;192	170	242	179;171	201;198	162	165	212	122	179	157	190	110	164	165;168	194;200	139	206;179		106;122;88;91	125		179;158	103	274
1821	Kaisosi C	Rundu	Kavango	Namibia	173	187;204	173;161	242	177	201;198	162;165	162	212	122	179;182		187;184	110	164;152;155	152;165;168	218;197;200		173	174;171	103	115;125	209	143;176;158;155	103;107;100	256
1843	Kaisosi C	Rundu	Kavango	Namibia	176	198	176	242	171	201	162	165	206	131	179	157	187	82;139;91	164	155		143	182	177	113	140		167	103	268
1874	Sambyu HC	Rundu	Kavango	Namibia	173	198;195	173;167	242;248	171	198	162	162	206;221	128	179	157		129;110;120	155	168	203	130;139	197	187;171	110;113	143;128	218	173;155	103
1919	Sambyu HC	Rundu	Kavango	Namibia	173	198;195;192	170;161	242;248;245		201;198	165	165	212;206;221;215	134;131;125;122	185;182;167	157	187;184	132;139;110;120	164;172;155	152;165;168;155	194;203	136;139;149;155		187;181;177;171	106;122;97	121;128;115	215;205	167;161;155;164	103;107	286;268;277
1929	Sambyu HC	Rundu	Kavango	Namibia		202	170	242		226	162	165	206	122	179	157	184	113	164;161	155	200	143	176	184	91	128	224	155	113	274
1953	Kayengona C	Rundu	Kavango	Namibia	173		173	242		201	162	162	197	116	179	178	187	110	152;155	165	212	146	176	177	110	128	215	161	103	271
1961	Sambyu HC	Rundu	Kavango	Namibia	173	195	173	242	171	198	162	165	218	125	179	157	187	120	155	158	227	155	197	165	106	131		164		265
1963	Sambyu HC	Rundu	Kavango	Namibia	173	192	161	288	174	201	168	165	206	128	179	157	187;184	101	155	155	194	136;146	200	168;184	103	131	224	167
1975	Kayengona C	Rundu	Kavango	Namibia	173	202	173	242	174	198	162	165	212	125	173	160	187	110	164	152	197	146	173	196	94;91	125		167		262
1979	Kayengona C	Rundu	Kavango	Namibia	173	202	158	242	165	198	162	162	221	131	167		187	123;120	152;155	152	197	136	173	171	110	128	215	161;158;164	107
1980	Sambyu HC	Rundu	Kavango	Namibia	179;173	195;192	176;179	227	171		162;159	165	212;206;197;218;203	125	179;182;167	160	187;184	107;129;110;113;101	155	180;165;189	215;200;206;212	139;146	176;188;191	174	110;128;97	121;128;131	199;218	167;149;161;158	103;97
1983	Sambyu HC	Rundu	Kavango	Namibia	173	208;202;187;198;189;192	170;173;167;176;161;158	242	171;174	201;198	162;165	162;165	212;206	134;131;128;122	179;182	157;160		123;126;98;129;110;91;120;101;116	164;172;155	171;152;165;168;189;162	194;197	152;136;139	155;173;179;176;200;191;194;197;170;182;203		125;100;106;119;103;97	134;121;128;115;125	209	118;191;188;170;167;179;161;158;155	94;103;110	268;271;250
1986	Sambyu HC	Rundu	Kavango	Namibia	173	198;189;195;204	170	258;242	171	198	162;165	162;165	206;209	128;125	185	157	184	110;91	164;155	152;165;162	194;200;209	139;149;143	173;152	174;177;171	110;100	118;134;121;140		146;161;158		253
1987	Sambyu HC	Rundu	Kavango	Namibia	182	189	167	227		201	165	165	215	128	182		187	113	164;161	155	197	143	200	181	113	134	215	161	100	271
1998	Kayengona C	Rundu	Kavango	Namibia	176;173	202;192	161	227;242	174	198	159	165		128;122	179;182	157;160	187	107;110;113;116	164;172;155	155	203;209;212	139;133	173;194;182	168;171	106	128;125		173;176;158	113;103;100	268;271;274;256
2011	Kayengona C	Rundu	Kavango	Namibia	176;173	208;198;189;195;192	170;161	276;261;258;242;245	171		168;162;156	162;165	206;197;218;209		179	157	190;187;184	110;120;116	155	152;165;168;155	197;200;206	152;139;133;143	173;185	168;177	106;103	143;128;131	221;212;209;205;218	149;158;164	113;103;107	271;250;247;265;256
2013	Kayengona C	Rundu	Kavango	Namibia	173	189;195	167;176;161	258	171;174	201;198	168;162	165		125;122	179;182	154	187	120;101;116	155	152;168	200;206	136;133	173;185	177	103;116	128		161;158	113	262;250;247;259
2024	Kayengona C	Rundu	Kavango	Namibia		195	173;164	258;242	171;174	201;198	165	162;165	206;197	128;125;122	179;182	157;160	187;184	101	164;155	168;155;183	197;203	130;139;146	173;170;182	168;187;162	100;113	121	221;212;218	136;188;149;161;155	94;103
2026	Sambyu HC	Rundu	Kavango	Namibia	176;173	192	167;179	242	171;174	201;198	162	162;165		122	179	160	187	110	155	171;155	197;203;206	136	176;200;191;194;185;182;203	184	100;113	131;125		173;176;161	103;107	262
2126	Nkarapamwe C	Rundu	Kavango	Namibia	176;173	192	167	227	171	201;198	174;162	165	206	125	182	160		94;98;91;101	164;155	165;168	194	139;158	179;191	165;177	125;103	128;131	215;218	109;161;164	103;107
2128	Nkarapamwe C	Rundu	Kavango	Namibia	173	192	167	242		201	165	165	212	125	179	157	187	91	164	165	197	139	179	171	110	128	224	164	103
2136	Nkarapamwe C	Rundu	Kavango	Namibia	173	198;195;192	170;167;158	242		201;198	165;159	162;165	206	119;128;122	179;167	157	187;184	110;113	164	152;180;155;162	200;203;212	136;146;124	173	137	94;110;100;116	121;128;131	209	161;155	103
2147	Nkarapamwe C	Rundu	Kavango	Namibia	173	195	173	242	171	198	162;165	162		125	179	157		110;101	172	180;177	206;212	143	173	137	106;103	128;131	221;218	173	103;107	274
2149	Nkarapamwe C	Rundu	Kavango	Namibia	176;173	189;195	179	227;236;221	171	201;198	162;159	165	221;215	112;125;122	179	157;160		110;120	164;155	168;155	218;200	133;143	212;191;194	174;165;171	110;113	128;131	215;218	170	103;107
2169	Nkarapamwe C	Rundu	Kavango	Namibia	173	198	161	242		219	162	162		125	179	157	187	120	155	171	191	139	197	165	91	121	205	158	100	253
2182	Nkarapamwe C	Rundu	Kavango	Namibia	173	198	173	242	174	201	165	165		122	179	157		110	155	165	197	143	173	174	106	131	209	158	103	280
2191	Nkarapamwe C	Rundu	Kavango	Namibia	173	195	185	242	171	201	183	165	212	128	167	157	187	126	155	152	218	136	179	181	94	118	205	158
2193	Nkarapamwe C	Rundu	Kavango	Namibia	173		167	242		201	168	162	221	125	179	157	184	120	155	152	197	146	197	171	110	131	218	158	107	256
2197	Nkarapamwe C	Rundu	Kavango	Namibia	176;173	198;189;195;192		227;242		198	168;162;159	162;165;174	212;206;197	134;128;125;122	179;182;167	157;160	187;184	110;113;120;104;101	164;172;155	152;165;168;155	197;200;212	136;133;143;146;155	173;179;176;170	137	94;110;100;106;113;119;103;116	134;121;128;131;125	199;212;209	140;161;158	103;100	235;268;274;262;253;256;259
2200	Nkarapamwe C	Rundu	Kavango	Namibia	176	192	173	261	171	201	165	162	212	122	179	157	184	132;129		168	209	143	170	174	106	128	221	161	103
2204	Nkarapamwe C	Rundu	Kavango	Namibia	176;173	198;189;192	170;173	258;242	165		156	162	212	122	179	160		110	164;155	168	200	146	197	171	136;100;106;113;103	125	215;221	164	113	271
2212	Sauyemwa C	Rundu	Kavango	Namibia	176;173	198	173	242	171		168	162	215		179	157	187	120;101	172;155	152	224;197	136	179	171	110	134;115	209	173	100	250
2213	Sauyemwa C	Rundu	Kavango	Namibia	176;173	189	170	242		198	156	165	230;215	122	185	157	187	101	155	189	197	139	179;200	174	94;110;122	115	205	167	103;100
2271	Sauyemwa C	Rundu	Kavango	Namibia	173	198;195;192	170;164	258	171	223;219;201;198	162;165		206	131;128;125	179;182	160	187;184	88;94;113;120;101	164;155	165;168	200;212	152;133;143;146	173	165;177;171	110	118	221;205;218	112;167;161	103;107;100
2278	Sauyemwa C	Rundu	Kavango	Namibia	176;173	189;195;192	170;173;167;164;182	258;242		201;198	162;165;156	162;165	206	125;122	179	157;154	187;184	110;113;120;101;116	164;155	152;165;155	194;197;200;203;212	152;136;139;143;146	173	168;187;181;171	110;100;106;113;122;91	134;128;125	215;221;209;218	161;158	103;107
2297	Sauyemwa C	Rundu	Kavango	Namibia	173	198;195;192	167;161	227	171	198	162;159	165	212;215	128;122	179;167	157;160		113;101	155	168	197;200	139;143;155	194	165;171	110;113;119;88;116;91	134;143;131;125	209;205;218	188;167;161	113;107
2299	Sauyemwa C	Rundu	Kavango	Namibia	176;173	195;192	164	258;242		198	162;165	162;165		122	179	157	187;184	101	164;155	168;155	197;200	136;139	179;185;170;182	187;181	110;106;113;122	128	221;218	161	103;107;100	238
2300	Kayengona C	Rundu	Kavango	Namibia	176	195	185	242	171	198	162	165	206	125	182	160	184	110	155	165	197	143	149	184	106	128			100	238
2303	Kayengona C	Rundu	Kavango	Namibia	173	202	158	242	165	198	162	162	221	131	167	160	187	123	155	152	197	136	155	171	110	128			103;107	262
2310	Kayengona C	Rundu	Kavango	Namibia	173	202	158	242	165	198	162	162	221	131	167	157;160	187	123	155	152	197	136	155	171	110	128			107	262
2331	Ndama C	Rundu	Kavango	Namibia	173	195	167	242	171	198	162	162;165	206	128;125	167	157;175	184	120;101	164;155	152;155	200;203;191	136;146	152;149	181	110	131			107	235;229;253
2342	Kayengona C	Rundu	Kavango	Namibia	173	189	170	227;258	174	201	162	165	221	122	179	157	187	101		155	200;203	152	152;146	190	106;122	121;128	205		103	253
2357	Ndama C	Rundu	Kavango	Namibia	173	192	170;167	227;258;242	171;174	201;198	162;165	165	212;206	122	179;182	157;160	187;184	120;101	164;155	152;165;168;155	194;197;200	136;139;149	155;146	174;190	94;106;113;122;119	121;131			103;107;100	271;250
2368	Sambyu HC	Rundu	Kavango	Namibia	173	198	176	227	171	198	162	162	218	128;125	179	157;160	184	88	155	152	224		152	165	113	125	205		103;100;97	271
608	Mashare C	Rundu	Kavango	Namibia	173	187;189;195	173	242	171		162	162	212;206;221;215	125	179	157	184	110	164;155	155	206	143	176;182	162	100	125		167	103
711	Nkarapamwe C	Rundu	Kavango	Namibia	173	192		242	171	201	150;156	165	209	125	179	160	187	91		189	156	149	176	202	103	125	209		103;100	268
719	Nkarapamwe C	Rundu	Kavango	Namibia	179	192		273	171	198	168;165	165	221	122	179	157	184	113;116		168	197	139	203	171	110	131	193;196		100	268
722	Mashare C	Rundu	Kavango	Namibia	176;173		167;176;164	242	171	201;198	162;165;156			134;119;122	179;182	157;160	187;184	123;107;110;101	164;155	152;165;168;155	194;197;200;191	136;139;149	173;179;176;197;182	159;165;171	110;100;113;103	121;128;131;125	215;221;209;205;218	143;170;167;152;149;161;158;155	94;103;107;100	292;286;268;289;271;295;274;250;247;253
781	Sambyu HC	Rundu	Kavango	Namibia	173	208		245	171	198	162;159	162	221	128	167	157	187	101		168	162;194	139	182	190;187	125;88	118;121	218		103;100	253
782	Sambyu HC	Rundu	Kavango	Namibia	176;173	208;198;189;195		230;227;242;245	171;174	201;198	150;162;165	162;165	206	131;119;128;125	179;182;167	157;160;154	184	110;120;101		152;165;168;155	194;197;200;203;206	152;136;139;133;149;146	173;179;176;188;185;197;182	168;171;150	110;106;103;97	134;121;128;131	215;199;221;212;205;218		103	274;250;253;259
784	Sambyu HC	Rundu	Kavango	Namibia	176	195;192		258		201	159	165	206	122	179	154	187	101		155	162;200;203	146	176	174	113	140	205	158	103	247
785	Sambyu HC	Rundu	Kavango	Namibia	176;173	198;192		227	174	198	162;165	155;165	206	134;125	179	157;160	187;184	110;91;101		152;165;155	194;197;200	152;139	173;191;194;182	168;181;184	94;106;103;116;97;91	134;128;131	209;205;218		103;107;100	268;271;280;256
789	Nkarapamwe C	Rundu	Kavango	Namibia		198		227;258	174	219	162	162	206;218;209	112;128	179	157	187;184	120		168	165	152;146	176;170	177	110	134;140;125	215;212;218	155	103	271
794	Sambyu HC	Rundu	Kavango	Namibia	176	198		227;258		201;198	162;165;159	165	212	140;122	179;182	157	187	88;107;110		152;168;155	197;203	136;139;146	179	187;171	94;110;116;91	134;125	215	170	103;100	268;253
798	Sambyu HC	Rundu	Kavango	Namibia	173	198;195		227;242	171	198	162	165	206;218;203	128;125	179;167	157;160	187	98;129;113;101		180;177;165;168;193;189	215;200;203;206	136;149;146	209;173;188;191;170	174;171;156	100;113;97	134;131	199		103	235;274
801	Sambyu HC	Rundu	Kavango	Namibia	173	198		227	171	198	162;156;159	162	218	128	179	160	184	88		152	224;162;221;227	139	173	165	113	125	205		100	271
802	Sambyu HC	Rundu	Kavango	Namibia	173	189		242	174	198	165;156	165	230	122	185;179	157	187	101		152;189	197;200	139	200	174	106;122;97	115	205		103	271
810	Nkarapamwe C	Rundu	Kavango	Namibia	173	198;189		258	171	201;198	162;165	165	224;212;206;230	116	179	160	187	98;101		152	200;206	152;127	155	187;177	110;106;113	134;131	205		103	268
811	Nkarapamwe C	Rundu	Kavango	Namibia	176;173	195;192		242	171	201;198	162;165	165	212;206	125	179;182	160;154	187;184	139;101		165;168	197;212	136	179;182	174;171	110;100;113;103;116;97	118;125	221		103;100	271;250
812	Nkarapamwe C	Rundu	Kavango	Namibia	176;173	189;195		258	171;174	204;201;198	162	165	206	122	179;167	157;154	187	101		155	203	143;146	176	174;190	113	140;131;137	205		103;100	280;262;247;265
822	Sambyu HC	Rundu	Kavango	Namibia	173	198		242	174	201	165	162	212	128	179	157	187	120		177	200;203	139	176	177	100	125	209		103	253
826	Sambyu HC	Rundu	Kavango	Namibia	173	202;198		258	171	201;198	162;165	165	212;206	131;122	179	160;154	184	113;120		155	194;197;165	136;146	155	181	106;113	121		167	103	253;265
828	Sambyu HC	Rundu	Kavango	Namibia	173	195		273	171	198	159	162	215	122	167	157	184	91		168	159;194	146	176	190	94	118	224		103	280
833	Nkarapamwe C	Rundu	Kavango	Namibia	173	198;195		258;273	174	198	165	162;165	215	134;131	179	157	184	129;110		168	197	136;139	179;176	208	110;100	121	209		103;100	268;271
834	Nkarapamwe C	Rundu	Kavango	Namibia	176	198		242	171	201	165	165	212	122	179	160	187	101		168	197;165	146	173	177	100	121	209		103	268
836	Nkarapamwe C	Rundu	Kavango	Namibia	173	198		242	171	219	162	162	206	125	179	157	187	120		171	191	139	197	165	91	121	205		100;97	253
839	Sambyu HC	Rundu	Kavango	Namibia	173	192		258	174	201	168;165	162	206;215	140	179	157	184	110		168	168;200;203	136	182	196	103	134;125	209		103	286;238
842	Sambyu HC	Rundu	Kavango	Namibia	182;173	198;189		227	171	201;198	162;165	162;165	218;215	128	179;182	157;160	187;184	88;113		152;155	224;197	139;143	173;200	165;181	113	134;125	215;205		100	271;250
843	Sambyu HC	Rundu	Kavango	Namibia	173	198		227	171	198	162;159	162	218	128	179	160	184	88		152	224;162;221;227	139	173	165	113	125	205		100	271
845	Sambyu HC	Rundu	Kavango	Namibia	173	198		242	174	201	162;165	162	212	128	179	157	187	120		177	200;165;203	139	176	177	100	125	209		103	253
848	Sambyu HC	Rundu	Kavango	Namibia	173	198;195;192		227;258;242	171;174	198	162;165;159	162;165	224;212;206;221;218;215	128;125	179;182	157	184	88;113;120		152;165;168	200;203	136;139;149;146	173;179;176;191;182	174;165;181;184	100;113;119;88;103	118;128;125	215;212;209;205;224		103;100	271;274;277;259
849	Sambyu HC	Rundu	Kavango	Namibia	173	198;195		227	171	201;198	162;156	162;165	218	128	179	157;160	184	88;107;110;91		152	224;162;200	136;139;146	173;182	165;150	110;100;113;119;116	121;125	205		103;100	268;250;265
850	Sambyu HC	Rundu	Kavango	Namibia	173	195		242	174	198	162;159	162	215	128	179	157	184	120		168	162;197;200	136	152;188;191	181	100	125	215		103;100	274
852	Sambyu HC	Rundu	Kavango	Namibia	173	198		230	171	198	162		206	131	179	154	184	120		168	203	146	188;185	171	106	112	215	158	103;100	253
853	Sambyu HC	Rundu	Kavango	Namibia	173	208;192		227;258	171	198	162;165	162	212;206	134;122	179;182	160	187;184	123;110;113;120		168	218;194	152;139	173;194;182;203	205;174;190;184;150;199	125;106	134;121	209;205		94;103	268;271
862	Sambyu HC	Rundu	Kavango	Namibia	173	192		227;242	171;174	201;198	162	162	212;221;218;215	128	179	157;160	184	120		152;168	197;200	136;149	173;179;191	165;181;150	100	121;125	215;224		100	274
1242	Mashare C	Rundu	Kavango	Namibia	173	195		227	171	198	162	165	212;218;203;209		160;179	157;160	187;184	113;101	155	180;168;189	215;203;206	146	188	174;171;156	94;128;100;113;97	134;131	199	167;149;158;164		286;235;268;289;271;253;256
1305	Mashare C	Rundu	Kavango	Namibia	182;179;173		167;176;161	227	171	201;198	162;165;156	162;165		128;122	179;182		187;184	88;107;110;120;104	164;155	152;165;168;155	224;197;200;203	139;143	173;152;200;194	165;181;184	113;103	118;134;125	215;205	170;173;161;158;155;164	103;107;100	292;268;289;271;250;253
1497	Ndama C	Rundu	Kavango	Namibia	173	187;195;192		242;236	171	204;201;198	168;165	165	206;215	119;125;122	179;182	157	187;184	129;110;120	164;172	152;165		130;152;136	179;182	205;165	94;110;91	134;125	221;218;224	146;170;176;158;164		268;250;253
1511	Ndama C	Rundu	Kavango	Namibia	176;173	198		227;258	171	198	162	165	215	119	179;167		184	110;113;101	155	155;189	197;206	136;146	197	174	110;113		215	158;155	103;107	247
1535	Ndama C	Rundu	Kavango	Namibia	173;185	192	164	242	171	201	165;156	165	206		179;182	157		110	155	189	197	152;146	179;176	174;202	103	128	215	161;158;155	107
1725	Rundu DH	Rundu	Kavango	Namibia	176;173		170;173;167;161;164	227;242	171	201;198	162;165;159	165		134;140;137;128;122	160;179;182	157;160	187;184;178	107;110;113;120;104;101	164;172;181;137;146;155	171;152;180;177;165;168;155	194;197;200;191	152;139;143;146	173;152;179;176;194;197;170	147;177;171;153	110;100;106;113;103;97;91	118;121;131;137;125	209;205		103;107;100;97	244;268;271;274;250;247;253;265;256
1729	Rundu DH	Rundu	Kavango	Namibia	173	195;192	161	242;288	171;174	201;198	162	168;165	206	128	179	157	187;184;178		164;155		197	146	173;176;194;170	168;184;171		131	209;218;224	170;173;167;164	103;107	268
1751	Sauyemwa C	Rundu	Kavango	Namibia	173	189;192	170;173	242		201;198	162;156	162	206;209	131;125	179	157;154	187;184	110;120	164;155	152;165;168;155	197;200	152;136;139;143		171	110;100;106	118;128	215;218	158;164	103
1780	Kaisosi C	Rundu	Kavango	Namibia	176;173	198;195	161;158	242	171	201	162;165	168;165		122	167	160	187;184	94;98;101	146;155	177;168;155	200;191		179;185	174;165;184	110;116	115		170;152;161	103;100	268;277
1804	Kaisosi C	Rundu	Kavango	Namibia	173	195;192	170;173	227	171;174	201;198	162;165;156;159			131;125	179	157	187;184	110;120;101	164;172;155	152;165	197;200;203	136	173;170	174	110;100;113;97;91		209;205	143;109;197;167;182;161;158;164	107;100;110	247
1809	Kaisosi C	Rundu	Kavango	Namibia	176	192	176	242	171		165	165	206	128	185	157	187	110	155	171	191	146	185	193	106	149	218	152;149
1886	Sambyu HC	Rundu	Kavango	Namibia		198;192	170;164	242	171;174	198		162;165	206;215	134;128;122	179;182	157	187	110;91;101	155	152;165	206	152;139	173;164;194;182;203	165	110;106	134;128		146;170;167;161;158;155;164	103;107	271;274
1905	Sambyu HC	Rundu	Kavango	Namibia	173	198;189;195;192	170;176	227	171;174	201	162;165;159	165		131;125	179;182	160	187;184	110;101	164;155	165;168	191;206;212		173;176;188;191	174;181;177;171	110	128;131		161;158	103;100	244;268;250;247;253
1907	Sambyu HC	Rundu	Kavango	Namibia	176		170	227;258;273	171	201	153;150;162	162;165		125;122	179;182	157;160	187;184	129;101	164	155	200;191	139;143;158	194	174;137;168;187;171;199	110;113;122	121;115;131;125		200;167;101	103;107	262;256;259
1940	Sambyu HC	Rundu	Kavango	Namibia	173	195	167	258	171		156	165	215		179;182	157	187	101	155	152	191	149	179;176	177	103	121;125		179;176;161	103;107;100	268
1948	Kayengona C	Rundu	Kavango	Namibia	176		164	227	171	198	162	162	224	140	182	160		132	164	155	197;209	143	197	174	106	128	205	143;140	103
1965	Sambyu HC	Rundu	Kavango	Namibia	176	195	176	242	174	198	162	165		125	179	160	187	101	155	152	197		173;170	171	106	128		173;176	103	280
1973	Kayengona C	Rundu	Kavango	Namibia	173	195	167	227		198	156	165	206	137	179	157	187	113	152;155	177	197	139	191	177	103	115	221		100
1982	Sambyu HC	Rundu	Kavango	Namibia	173	198	161;158	230		198	162	165	206	131		163	184	120	143;140;149;137;146;152	168	203		188	171	106	112	215	170	103;100	253
1995	Kayengona C	Rundu	Kavango	Namibia	173	192	164	242	174	201	156	165		128	179	157	184	120	155	168	206	139		177	100	134	215	173	103
1999	Kayengona C	Rundu	Kavango	Namibia	179;176;173	198;195;192;204	173;167;176	227;258;242;273	171;174	201;198	168;162;165;156;159	162;165		131;128;122	179	157	187;184	107;110;113;101;116	164;155	152;177;165;168;155;174	194;197;200		191;197;170;182;203	171	94;110;100;113;116	121;140;131		143;146;149;161;158;155	103;107;100	271
2001	Ndama C	Rundu	Kavango	Namibia	176	192	179;164	258;242;245	171;174	198	162;165		206;197	134;125	182	157;160		91;120	164;155	165;189	197;206	136;146	176;194	174;193;181;199	94;106;91	128;125	221;212	167		232;235;238;250;253
2008	Sambyu HC	Rundu	Kavango	Namibia	173	195	167			198	168	165	212	122	179	157	187	110	164;161	152	200		200	171	91	121	224	158	103	241
2018	Kayengona C	Rundu	Kavango	Namibia	176;173	198		227;258	171	198	162	162	215	119	179;167	157	184			155	162;197	136;146	197	174	110;106;113	118	215	158;155	103;107	271;262;250;247;256
2150	Nkarapamwe C	Rundu	Kavango	Namibia	173	195	170	258		198	162	165		116	179	157	187	110	164	174	203	149	173	177	110	131	215	161;164	103
2155	Nkarapamwe C	Rundu	Kavango	Namibia	173	198	173;167;164	258;242		201	165	165	221	122	179	157	187;184	110	155	165;155	197	143	173	174		121;140;131	212	158	103
2179	Nkarapamwe C	Rundu	Kavango	Namibia	173	198;195	173;167	242	171	198	159	162	206	128;122	179		184		155	165	215	136;143	173;179;191	174	116	128;131		149	103	268;271
2180	Nkarapamwe C	Rundu	Kavango	Namibia	173	192		258	174	201	168	162	215	140	179	157	184	110	164	168	203	136	182	196	103	134;131	209	173
2199	Nkarapamwe C	Rundu	Kavango	Namibia	173	192	170	258	174	201		162	206	122	179	157	187	113	164	152	200	146	200	181	100	128		155		274
2228	Sauyemwa C	Rundu	Kavango	Namibia	182;176;173	198;195;192	170;173;167;176;161;185	227;258;242		201;198	168;162;165;156	162;165	206	134;128;125;122	179	157	187;184	98;110;91;120;104;101;116	164;172;155	152;165;168;155	197;200;203;206	152;136;143		168;181;177;171	94;110;100;106;113;103;97	118;134;121;112;131;125	205		103;100	268;247;253
2235	Sauyemwa C	Rundu	Kavango	Namibia	176;173	202;187;198;195	167	227;242	171;174	198	162;159	162;165	212;221;215	128	179;182			94;110;113;91	164;172;161;155	168	197	152;139;149;143	173;179;200;194;197	174;181;171	110;100;103;116	134;128;131	215	185;173;167	103;110
2257	Sauyemwa C	Rundu	Kavango	Namibia	173	192	173	258			162	162	221	122	167	157	184	101	164;155	168	194	130	179	190	100	125	221	152;101;161;164	97
2259	Sauyemwa C	Rundu	Kavango	Namibia	176;173	192	164	245			162	165	197	125;122	182	157	187	91	164;155	165;168	194;206	130;146		181	100;91	128	221	167	103;97	235
2272	Sauyemwa C	Rundu	Kavango	Namibia	173	198;189;195;192	170;161	227;258;242	171	201;198	168;162;165		212;206;221	134;140;128;125;122	179;182		190	88;113;91;120;101	164;152;155	165;168	197;203;206	152;136;133;143;146	173;176;185;170	174;193;168;165;181;184;177	110;106;113;103	118;143	209;218	143;112;146;140;167;152;149;161;158;155;164	113;103;107;100
2275	Sauyemwa C	Rundu	Kavango	Namibia	179;173	189;195	170;164	258;242	171		168	162;165	203;215	125	179;182	160	184	98;113;101	164	168;155	203	136;149	173;152;176	177	113;116	134;121;131			110	274
2294	Sauyemwa C	Rundu	Kavango	Namibia		198;189;195;192	170;161;164	227;242		201;198	168;162;165;156	162;165	212;206;209	134;125	179	157	187;184	139;113;91;120	164;152;155	171;168;155	194;197;203;206	136;133;146	173;176;185;170	174;168;184;177;171	110;100;106;113;103	118;134;143;128;131	221;218	112	113;103;107;100
2312	Kayengona C	Rundu	Kavango	Namibia	173	189	161	258		198	168	165	206;197;218;209	122	182	157	190;184	120	155	168	206	133	146	177	103	131			113;103	250
2333	Kayengona C	Rundu	Kavango	Namibia	173	195;192	170;167	227	171;174	201;198	162;165	162;165		122	179;167	157;160;154	187;184	110;120;101	164;155	152;168;155	197;200	130;152;136;139;149;155	152;158;146	171	136;113;103	134;128			103;100	268;271;274;247;253
2352	Kayengona C	Rundu	Kavango	Namibia	176;173		173;167	227;242	171;174	201;198	162	162;165	206;209	140;122	179;167	157;160	184	107;110;116	164;155	152;168	194;197	152;136;149;155	167;146	177;171	136;113;119	128			103;107;100	271;274
708	Mashare C	Rundu	Kavango	Namibia			167;161;179	227;258	174	219;198	162;165	162		128;125	157;179;182	157;160;154	184	126;107;98;110;101	181;155	152;177;168;155	197;206	136;139;158	173;152;179;200;191	137;184;140	106;103	128;115;125	215;221;218		107;100;110;97	274;262;247
786	Sambyu HC	Rundu	Kavango	Namibia	173	195		273	171	198	159	162		122	167	157	184	91		168	194	143;146	176	190	94	118;115	224		103	280
796	Sambyu HC	Rundu	Kavango	Namibia	173	198		230	171	198	162	165	206	131	179	154	184	120		168	162;200;203		188;185	171	106	140;112	215		103	250;253
797	Sambyu HC	Rundu	Kavango	Namibia	173	195		242	171;174		162;159	165	203	134;131	167	160;154	184	107;98;110;120		152;168	162;194;197;203	136;133;143;146	188;182	168;181;171	106;113	131		164	103	253;265
807	Sambyu HC	Rundu	Kavango	Namibia	173	198		242	171	198	162	165	215	122	179	157	187	120		171;168	194	136	179	174;187	110	131			97	241
817	Sambyu HC	Rundu	Kavango	Namibia	176	192		242	171	201	162	165	206	122	179	160	187	110		171	203	136	194	184	113	131			103	262
821	Sambyu HC	Rundu	Kavango	Namibia		198		230	171	198	162;159	165	206	131	179	154	184	120		168	162;203	146	188;185	171	106	112;125		158	103	253
829	Sambyu HC	Rundu	Kavango	Namibia	173	198;195		242	174	226	162	165	212	125	179	157	187	113		155	206	149	176	184	91	118			110	274
835	Nkarapamwe C	Rundu	Kavango	Namibia	173	198		242	171	198	162	155	206	125		154	187	88		152	224;221	136	173	165	100	128	218		100;97	271
840	Sambyu HC	Rundu	Kavango	Namibia		195;192		258;242	171	198	162	155	224;221	137;125	179	157;160	187	110		165	162;197;200;206;209	139;149	173;176	174;177	119;116	128;131	205		103;100	271;277
847	Sambyu HC	Rundu	Kavango	Namibia		198;195		227	171;174	201;198	162;159	162	212;206;218	131;128	179;182	157	184	88;120		152;177	224;197;200	136;139;149;146	173;188;191	168;165;181;184;171	100;106	112;125	215;212;209;224		103;100	268;271;274;277
856	Nkarapamwe C	Rundu	Kavango	Namibia	173	198		242	171	201;198	162	165	215	122	179	157		113		168	203	143	182	165	82;94;85;100;88;91	134	209		103;107	268
864	Sambyu HC	Rundu	Kavango	Namibia	173	202;198;192		242	171	201;198	162;165	162;165	212;221;215	128;122	179;182	157;160		88;110;113;120		152;168;155	197;200	136;149	155;179;212;191	174;165;181	100;113;119	121;128;125	215;221;205;218;224		103;100	271;274;277
1224	Mashare C	Rundu	Kavango	Namibia	173		161	227;258	171		162	162		122	179	157;154	187	110	164;155	152;155	197	136;139	179;170	140	110;103	121;115	205	152;179;149;155		277
1265	Mashare C	Rundu	Kavango	Namibia	173	198;195	173;161	227;242	171	198	162;165	162	212;221	140;131;125		157		110;120;101	172;155	180	206;212	139;143	173;176	137	110;106	128;131	221;218;224			268;274;277;250;265
1327	Mashare C	Rundu	Kavango	Namibia			173;167		171;174	204;201;198	162;165;159	162;165	206	128;125	179;182	157;160	187	110;113;120;104	155	152;168;155	218;197;200;203;209	136;139	173;179;176;170;182	187;184;171;150	128;100;103	121;140;131;125		170;161;164	107;100	235;271;229;250;247
1328	Mashare C	Rundu	Kavango	Namibia	173	198		227	171	198	162	162	206	131;128;125	182	157		113;104	155	152	218;197;200;209	136	173;179;182	171	128;113;122;103	121;131			103;107;100	247
1352	Mashare C	Rundu	Kavango	Namibia	176;173	198;189;195;192		227;258;242	171		162;165	162;165	221;218		179;182	157;160	187;184	88;132;110;113	155	152;168;155	200	136;139;146	155;152;182	165;171	110;113	121;131	209;205		100;97	268;289;262;250;253;265
1354	Sambyu HC	Rundu	Kavango	Namibia	173	195			174	201	162		215	131	179	160		110	164	165	212	146	197	177	110	121	221	167	103	268
1547	Ndama C	Rundu	Kavango	Namibia	176;173	198;189	173;176;161	227;242	171		168;162	165	212;206			157;160;175;178	187;184	110;120;101	164;155	152;168	200	130;136;133;143	179;191;185;197;170;182	174;168;184;177	106;103	121;131;125	212;218	173;155;164		286;289;250;247
1683	Rundu DH	Rundu	Kavango	Namibia	173			242	171	198	168;165	165		134;137;128;125	160;182	157;163	190	107;101;116	164	152	197;191	136;139	173;176;170	147	110;113	118;134;137	227		103	247
1740	Nkarapamwe C	Rundu	Kavango	Namibia	176;173	198	167;161;164	227;242		201;198	162	162;165	206;197;215	128;125	185;182;167	157;160	187	107;110;113;101	164;181;155	152;165;155	194;197	152;133;146		174;181	94;106;103;116	128	212;205		103;107;97
1746	Nkarapamwe C	Rundu	Kavango	Namibia	176	198	170	242		198	162	165	206		182	160	184	101	164	165	206	139	188	184	106		221	158	97
1805	Kaisosi C	Rundu	Kavango	Namibia	173	198;195;192	173;161			204;201;198	156;159	162;165	206	131;125;122	179;167		184	110;120;101	164;172;152;155	165;168;189	197;200;203	152;136	173;176;182	174;190;168;184;171	110;100;97;91	121;128;115;125	221;209;205;218	167;182;161;164	103
1813	Mashare C	Rundu	Kavango	Namibia		189;195;192	170;167;161;164			201;198	162;165;156	165	212;206	128;122	179;182	157	187;184	110;91;101	164;152;155	171;152;168;155	197;200	130;136;139;143	173;176;197;182;203	174;168;165;177;171	100;113;91	121;128;115;131;125	215;209;205;218	109;146;158;155;164	107;100
1828	Kaisosi C	Rundu	Kavango	Namibia	173		164	227;242	174	201;198	176;162;165;156	162	206	128;125	179		187	94;98;110;101	164;161;155	152;177;165;168	194;200;203	152		174;159;184;171;162	97	121;143	215	173;167;149;161;155	103;100;110
1836	Kaisosi C	Rundu	Kavango	Namibia	173	198;195	167	242	171	198	165	162;165	212;206		185;179	157	187	107;110;120;101	164;155	152;168;155	194;203;206	136;146	176	174;171;150	110;100;106;103	128;115	215;218
1918	Sambyu HC	Rundu	Kavango	Namibia	173	195	173	242		198	162	165	206	119	182;167		184	110;120	152;155	152	194;200	146		165	106;116	118;125	205;218	173	94
1981	Sambyu HC	Rundu	Kavango	Namibia		198	161	242		201	165	162	212	128	179		187	120	152;155	177	203	139	176	177	100	125	209	121;170	103
2129	Nkarapamwe C	Rundu	Kavango	Namibia	182	189	167	227		201	165	165	215	128	182	157	187		164	155	197	143	200	181	113	134	215		100
2130	Nkarapamwe C	Rundu	Kavango	Namibia	173	192	173	227	171	198	162	162	212	128	179		184		155	152	224	130	173	165	113	131		158		271
2132	Nkarapamwe C	Rundu	Kavango	Namibia	176;173		173;179	242		198	162;165	165	212;221;209	122	179;182	160	184	129;110		168;155	194;212	143;146	179;176	190;187;181;184	110;122	121;131	215;218	161	103
2134	Nkarapamwe C	Rundu	Kavango	Namibia	173	189;195	170;173		171;174		162	162;165			179	157	184	110;101	164;155	152;165	197;212	136	173	177	106;103	134	215;209	173	103;100	238;241;247
2153	Nkarapamwe C	Rundu	Kavango	Namibia	176;173	195	167	227		201	162;165	165	212	122	179		187;184		164;189;155	152;165	215;212	130;149	173	165;187;140	110;97	134;128;137		161	94;103	283;271;280
2203	Nkarapamwe C	Rundu	Kavango	Namibia	173	189;192	170;167	258		198	162	165	209	125			187	139;110;113;142	155	165	203;206	136	176	171	113;119	128;131	205	158;155		271
2248	Sauyemwa C	Rundu	Kavango	Namibia	176;173	202;187;198;195;204	173;167;176;161;164	227;242;245	171;174	201;198	162;165;159	165	212;206		179;182	157	187;184	110;113;91	164;172;155	177;168	215;194;197;212	136;139;149;143	179;194;197			134;128;131;125	215;205	167;158	103;110
2282	Sauyemwa C	Rundu	Kavango	Namibia	173	198;189;195;192	167;161;164	227;242		201;198	168;162;165;156	165	212;206;218;215;209	134;125;122	182;167	157	184	139;110;113;91;120;101;116	164;155	168;155	194;197;200;203;206	136;133;146		165;177;171	110;113;103	118;134;128;115;131;125		112;161;158	113;103;107;100;110
2350	Sauyemwa C	Rundu	Kavango	Namibia	173	192	167	242		201;198	162	162	209	122	167	160	184	110	155	180;168;155;186	218	155	155;152;146	171	136;97	128			103
2359	Kayengona C	Rundu	Kavango	Namibia	173		170;167	242		198	162	162;165	212;206;215	128;122	179;182	157	187	94;98;129;110;101	164;155	152;165;168;155	197;200	136;139;149	155;170;149;146	174;165;171	94;106;122;119	121;128;131			103;107;100	238;250
2524	Nkarapamwe C	Rundu	Kavango	Namibia		202;187	164;196	258;242	171;174	201;198		162	212;215	128		157	187;184	98;110;91;116	164;155	168		143;146	152	181;177	113;116	134;128	215;212	149	103;100	268;289;271;274;250;253;256
2525	Kayengona C	Rundu	Kavango	Namibia		195	158	227	174	201		165	206	128		160	184	113	155	152		136	152;176;158;203	171	113	134	218	149	103	268
67	Kayengona C	Rundu	Kavango	Namibia	179;173	208;192		227;258;242		198	162	162	212	122	179;182	160	187;184	120		168	194	152;139		190;187	125	134;121	209;205		94;103	271
559	Mashare C	Rundu	Kavango	Namibia	173			258	177	198	162	174		125;122	179	157;160		104;101	155	158;152	200;212	143	155;173;176	174	110;100;106;113;119;91	128;125	209	170;173	103
795	Sambyu HC	Rundu	Kavango	Namibia		198		227	171	198	162	162		128	179	160	184	88		152	224;221;227	139	173	165;184	113	125	205		100;97	271
818	Sambyu HC	Rundu	Kavango	Namibia	173	195		242	174	198	159	162	206	119	167	160	184			155	200	146	191	177	116	128			103	262
857	Nkarapamwe C	Rundu	Kavango	Namibia	176	195		242	171	198	159	165	209	128	173	160	184	82;110;91;101;152			197	143	173	171		125	209		103	268
861	Sambyu HC	Rundu	Kavango	Namibia	173	202		258	171	201	165	165	212	122	179	160	184	113		155		136	155	181	113	118;121	221			271
1346	Mashare C	Rundu	Kavango	Namibia	173	195	167	258			168	165	212	122			187	110;120	164	152	200	139	200	171	91	121	209;224	161;158	103
1528	Ndama C	Rundu	Kavango	Namibia	176;173			227;258;242	165;171			165	206;215	131;125;122	179;182;167	157	187;184	110;91;120;101	164;155	152;165;168	197;203	136;139;143;158	173;179;176;185;170;182	174;177;171	110;100;113;91	118;134;125	221;209;205		113;103;100;110	247
1657	Rundu DH	Rundu	Kavango	Namibia	179;173			242	174	198	162;165	162;165		122	157;167	157;154	190;184	91;104	164;155	152	197;200	136	176;182	193	100;106	128;125			107;116	268;271
1703	Rundu DH	Rundu	Kavango	Namibia			170;167;176	227;242	171	198	168;165;156;159			137;128	179;182	157;160	190;187;184;178	110;101	164;155	152;177;165;168	197;191	152;139;143	173;152;176;191;185;197;170	147;177;171;153	110;106;113;91	121;128;131;137;125	227;209;205;218		103	244;268;274;262;250;247;253
1709	Rundu DH	Rundu	Kavango	Namibia	173	192		227	171		159	165	206	131;125	182	160		110;116	155	165	212	139	176	174	110;106	128;115;125			110	247
1799	Kaisosi C	Rundu	Kavango	Namibia	173;185	192		258;242	171		162;156	165	221	122	179	160	187;184			165;189	197;203	152;139	179;158;161	168	103;116	128;131		167;158	103;107	277
1949	Kayengona C	Rundu	Kavango	Namibia	173		161	242	171		162	162	206	125	179		187	120	152;155	171	191	139		165	91	121	205	158;155	100
1967	Kayengona C	Rundu	Kavango	Namibia	173	198	179		171	201	165	165	206	137	179		184	101	152;155	152	197	146		181	85	140		170;176	100
2003	Sambyu HC	Rundu	Kavango	Namibia	182	189	167	227	171	201	165	165	215	128	182	157	187	113	164	155	197	143		181			215		100;97
2127	Nkarapamwe C	Rundu	Kavango	Namibia	173		179	242		198	165	165	212	128	179	157	187	101		155	200	133	194	174	122	115	218		103
2253	Sauyemwa C	Rundu	Kavango	Namibia	173	189	170	242	171	198	162		197	140;122	179			110;91;120	155		224;203	152;139	173	171		134	209	182	103	271
2276	Sauyemwa C	Rundu	Kavango	Namibia	173	195;192	161;164	258;242		201	162		212	134;125	179		184	139;120;101	164;152;155	165;168	197;203;212	133;146		184;177;171	113		218	109;112;167	107	247
2277	Sauyemwa C	Rundu	Kavango	Namibia	173	195	170;167	258		201	162	165	206		179	157		120	164	152;165;155	203;206	139;146		168	94;106;91	134;121;128;115;131	209;224	155	107
2279	Sauyemwa C	Rundu	Kavango	Namibia	173	198;195	170;164			201;198	162;165	162;165	206;215		179;182	157		110;101	164;181;137;146;155	155	194;197	136;139	173	168	106;122	128	218	167;158	103;107;100
2314	Sauyemwa C	Rundu	Kavango	Namibia	173	192	170	242		198	171	162	212	125	173	157	187	132	164	152	200	143	149	171	94	121
2315	Kayengona C	Rundu	Kavango	Namibia	176;173	192	167;179	258		198	162;165	162	206		182	160	184	120	164;155	189	197	136	173;149	193	106	125			107;100
2354	Kayengona C	Rundu	Kavango	Namibia	173		173;167;176	227;258;242		201;198	162;156	162;165	206	125;122	179;167	157;160;154	187;184	110;101	155	180;165;168;155;186	194;200	152;136;139;155	149;146	174;171	113	128;125			103;107
2356	Nkarapamwe C	Rundu	Kavango	Namibia	173		167;176	227;258;242		201;198		162;165	206	134;128;125;122	179;182;167	157;160;154	187;184	101	164;155	165;168;155	194;197;200	152;136;139;149;143	149;146	174;190	106;113;97	121;128;131;125			103;107;100	268;250
2371	Ndama C	Rundu	Kavango	Namibia	173	189	173	242	171	198	162	165	212	128;122			184	101	155	177	203		152	168	110	128			103;107;100;110	277
2468	Kayengona C	Rundu	Kavango	Namibia		195	167;176	258;242	171	198		162	215;209	122		157;160	187;184	110;113	164;155	168		136;139	227;167;146	181;171	100;103	134	224		103;100	274
2488	Ndama C	Rundu	Kavango	Namibia		189	170	258		201		165	206	125		160	187	98;101	164	168		136	170;146	177	113	121	205	146	107;110	274
2489	Sambyu HC	Rundu	Kavango	Namibia		198	176	227	171	198		162	218	128		160	184	88	155	152			152;200	165	113	125	205	149	100;97	271
2514	Kayengona C	Rundu	Kavango	Namibia		195;192	170;167	258;242	171	204;201;198		162;165	212;206;215	125;122		157;160	184	129;110;113	164;155	165;168;155		136;139;143	149;146	171	100;113;119;116	118;128	209;205		103;107	235;271;247;253
2575	Sambyu HC	Rundu	Kavango	Namibia	173	195		258		198	168	165	212	122	179	157	187;171	110		152	200	139		168;187;171	91	121	224		103;100	241
63	Kayengona C	Rundu	Kavango	Namibia		195			171	198		165	206	119	167	160	159	107;110		152		146	182	184	116	112	218	164	103;100	274
710	Sambyu HC	Rundu	Kavango	Namibia	179;173	195		227;242	171	198	162		212;206;218;203	125	179;167	157;160	187	98;129;110;113;101		180;177;168;193;155;189	215;200;206	136;149;146	209;173;188;191;170	174;171;156	100;113;119;97	134;131				286;235;268;289;271;274;250
736	Sambyu HC	Rundu	Kavango	Namibia		195		258	171	198		165	206	125	179	157	187	110		155		146	176	190	110	128	215		113;110	268
816	Sambyu HC	Rundu	Kavango	Namibia	176	198		258	171		165	162	215	128	182	157	187	110		168	203	146	173	171	100	125				283
819	Sambyu HC	Rundu	Kavango	Namibia	173	198;195		230	171		162;159	165	206		179	154	184	110;120		168	203		188	181;171	106	112;125		158	103	253
820	Sambyu HC	Rundu	Kavango	Namibia		198		230	171	198	162;156;159	165	206		179	154	184	120		168	162;200;203	146	188	184;171	106	112			103	253
825	Sambyu HC	Rundu	Kavango	Namibia	176	195		227	171	198	162	162	206	125	179	157	184	123;120			203	139	182	184;177		125	205			268
830	Sambyu HC	Rundu	Kavango	Namibia		195		242	174	198		162	215	128	179	157	184	120		168		136	188;191	181	100	125	215		100	274
841	Sambyu HC	Rundu	Kavango	Namibia	182	189			171	201	165	165	215	128	182	157		113		155	197	143	200		113	134	215		100	271
844	Sambyu HC	Rundu	Kavango	Namibia		195		242	174	198		162	215	128	179	157	184	120		168		136	191	181	100	125	215		103	274
863	Sambyu HC	Rundu	Kavango	Namibia	173	192			171	198	162	165	221	134;131	182	157		148;139;129;110;120		165	200	149	179		119	128	224		103	277
1338	Rundu DH	Rundu	Kavango	Namibia	176;173	198;189;192			171	204;201;198	162;165;156	168;162;165	206;215	131;119;128;125;122	179;182;167	157;160;175			155	152;177;165;168;155	194;197;200;203;209	152;136;139;143	173;179;176;188;185;197;170		110;100;106;113;116	134;121;128;115;131;125	215;221;212;209;218		113;103;107	268;283;271;274;280;262;250;247;253;265;256
1498	Ndama C	Rundu	Kavango	Namibia	176;173		167;185	258;242	171	201;198	162			128;125			190;187	98;113;104;101	155	165;168	221;194;197;203	152;136;146		174;177	133	121;131;125	209;205	167;161;164	103	268;247
1745	Sambyu HC	Rundu	Kavango	Namibia	173	198	161	242				162	212	131	179		187	110	164;155	165	218;197	139		181	100	121	224	161	103
1803	Kaisosi C	Rundu	Kavango	Namibia	173	198	176;161;164	227		201;198	162;156;159	162			185;179	160	187;184	88;91	164;172;152;155	152;165	224;197;200;203;206	139		165;171	94;110;100;113;97;91	115;125	205		107;100
1835	Kaisosi C	Rundu	Kavango	Namibia	173	195		242		198	156		215	125	182	160		101		174	206	133		174	113	128	218	164	103	268
1906	Sambyu HC	Rundu	Kavango	Namibia	173		173		171	201	162			122	182	160	184	101	155	152	200	152	176;182	193	113	128		161		271
1941	Sambyu HC	Rundu	Kavango	Namibia	176;173	198;195	173;167;164	230;227;258;242;245	165;171		162;165;156	168;162;165	212;206;215	134;119;128;122			187;184		155	152;165;168;155	194;197;200;203;191		173;152;176;188;197;182;203	174;168;165;171	110;100;106;113;103	121;128;131;125		130;143;146;140;170;167;152;149;155;164	94;103;107;100;97	268
1954	Kayengona C	Rundu	Kavango	Namibia		192	167			201		165	218	134	179		184	120	152;155	165	197		188	181	119	137	221	176	103	223
1959	Sambyu HC	Rundu	Kavango	Namibia			173;161	227;242	171;177;174	201;198	159	162;165	215	125	179		187	101	181;155	152;155	197;200	130	179	168;177	110;103;116	134;140;131		109;170;167;179;161;164
1962	Sambyu HC	Rundu	Kavango	Namibia		198	170	242		198		165	218	128	179	160	184	88	152;155	152	224	136	170	165		125	215	158;155
2317	Ndama C	Rundu	Kavango	Namibia	173		170	242			162	165		122	179	157	184	126;98;129;101	155	165	194	136	146	181	116	134			103;100	274
2322	Kayengona C	Rundu	Kavango	Namibia	173		173;167	258;242		198	162	162	215	134;122	167	157;154	184	110;120	155	165;186	200	139;146;155		174	97	128			103;107
2338	Sauyemwa C	Rundu	Kavango	Namibia	173	195	167	258	171	201;198	165	162	206	128;122			187	120;101	155	171	209			174	100	128			113;107	268
2466	Ndama C	Rundu	Kavango	Namibia		192	167;164	242		198		165	212;206;215	128;122		157;160	184	110;91;101	164;155	152;177		139;143		168;181	110;125;106	140;128;125	212;209	101	103;100	235;283;250;253
2473	Nkarapamwe C	Rundu	Kavango	Namibia		198	161	273	174	201		165	224;212;221;215	128;122			184	123	164	152		139	191	174	110;88	125	212		107	262
2494	Kayengona C	Rundu	Kavango	Namibia		198	173;167	258	174	223;226		165	206	128;122		157;160	187		155	152;165		136;143	152;146	165;184	106	140	205		103;100	274
2510	Nkarapamwe C	Rundu	Kavango	Namibia		195	167	242;245	171;174	201;198		171;162;165	212;203;215	134;116;137;131;119;128		157;160	187;184	110;120;101	172;155	152;165;168;155		143;146	152;149;158;161	168;181;171	110;100;106;113;116	134;125	205			244;232;289;271;262;247;265
12	Nkarapamwe C	Rundu	Kavango	Namibia		198		258	174	198		165	206	128	182	157	152	82;107;110;91		152		152	164	168		140	215;218		97	253
14	Nkarapamwe C	Rundu	Kavango	Namibia		195		242	171	201		162	206	128;125		154		98;101		165		136;139	173	184	106	125	218	149	103	268
18	Nkarapamwe C	Rundu	Kavango	Namibia		189;195		242	171	219;201		165	224;221;230;215	125;122	182	157;160		110;101		168;140		130	173	171	110	128;131	209		103	268
20	Nkarapamwe C	Rundu	Kavango	Namibia		198;195		258;242;273	174	198		162;165	215	134;131;128;125	179	157		107;129;110;120		168		136;139;143	179;176	181;171		121	209	152	103;107;100	268;271
21	Nkarapamwe C	Rundu	Kavango	Namibia		198;195		227	171;174	198		165	212;215	128;125	182	157		110;120		152;165		136;139	179;176	181		118;134	209	146	103;107	271
23	Sambyu HC	Rundu	Kavango	Namibia		195		258		226		165	206	122	179	157		110;113		155		139	200	184	91	128	224	143	103;100	274
28	Nkarapamwe C	Rundu	Kavango	Namibia		198		261	174	201;198		162	212	149;131;128	179	157				168		152	170	187	91	121	218	158	103;100	274
36	Nkarapamwe C	Rundu	Kavango	Namibia		198;189		258;242	171	198		155;162;165	206	116;125;122	179	157;154		123;88;94;120;116		152;165		152;136	173;176	174;165;184	100	128;131	215;221;218		103;100;97	232;238;271;241
45	Nkarapamwe C	Rundu	Kavango	Namibia		195		258		201		165	215	131;128	167	157		120		155		146	176	174	113	134	221	149	103	247
[truncated: 622 more rows]
