# Supplementary figures and images for: Using parasite genetic and human mobility data to infer local and cross-border malaria connectivity in Southern Africa
Source: eLife journal article supplement (doi:10.7554/elife.43510), 2019-04-01

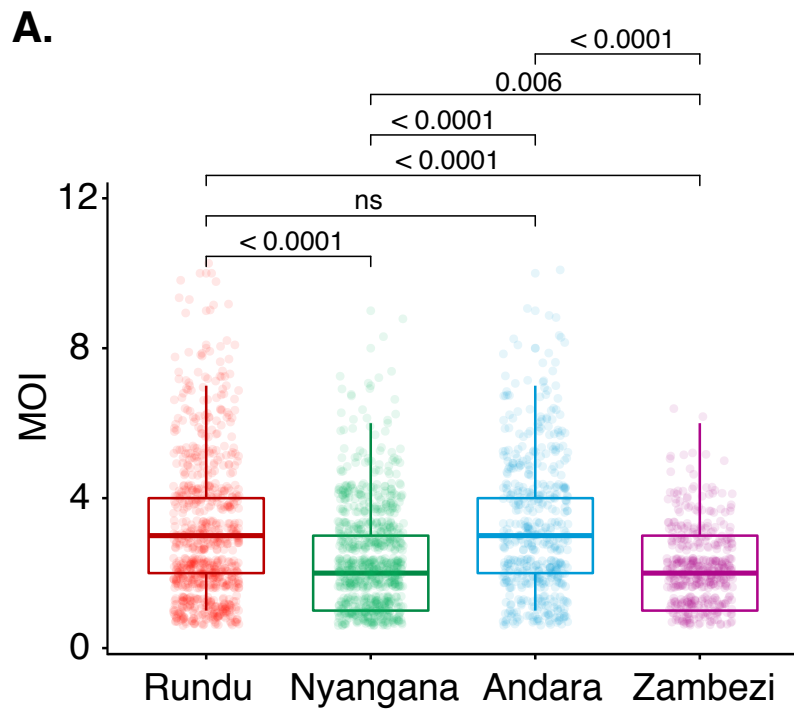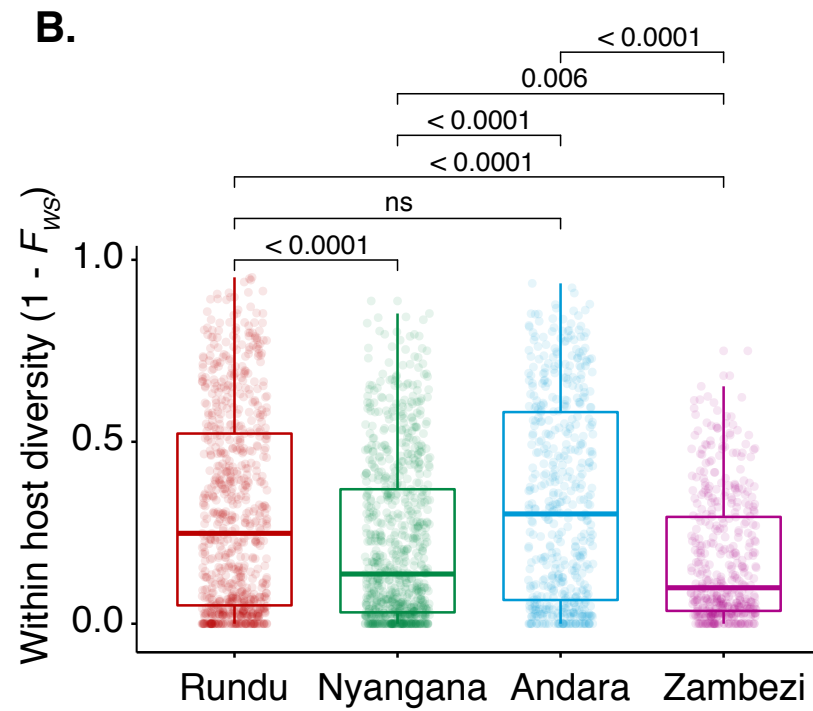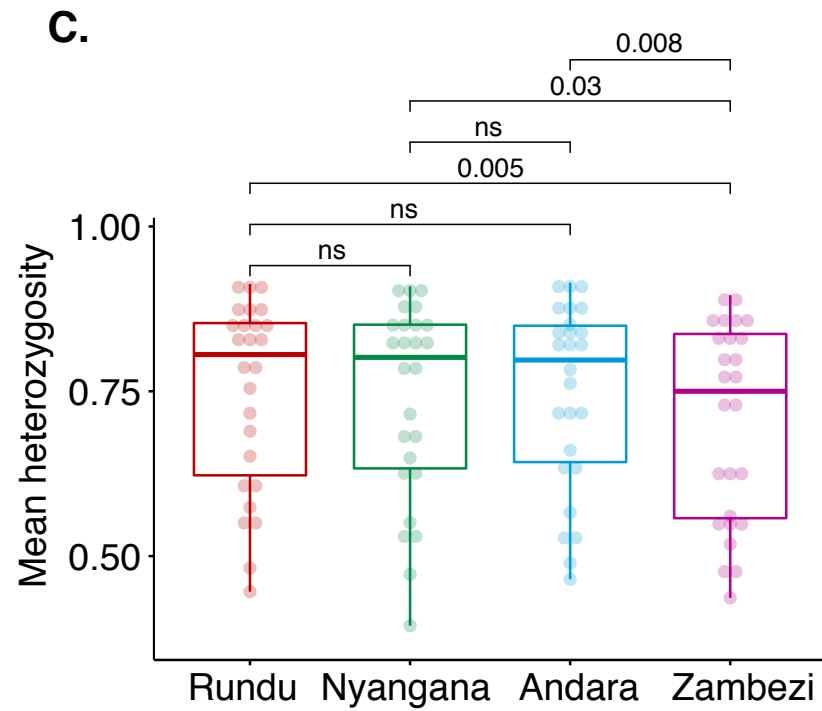

**Locations:**

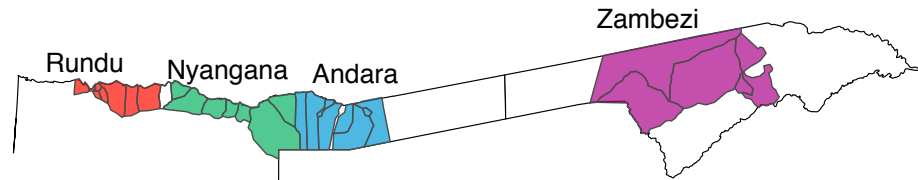

Supplement: supp [file elife-43510-supp-v1.zip › elife_poa_e43510_Figure_2_figure_supplement_1.pdf]

## Kavango East

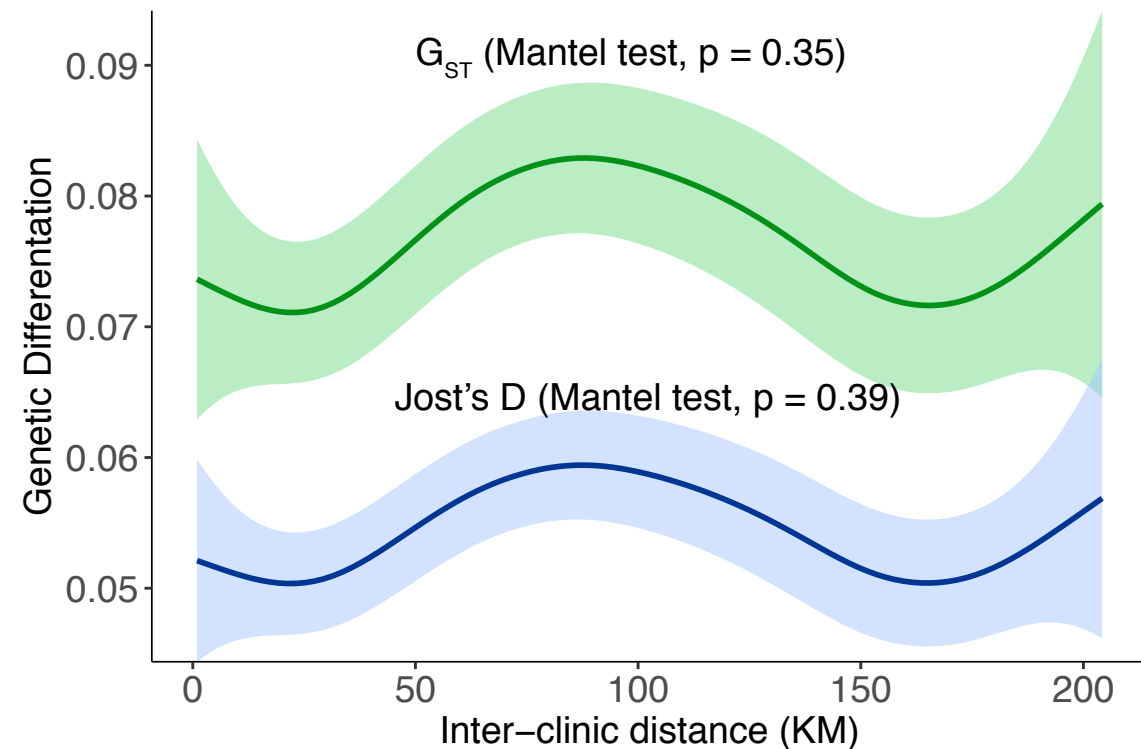

## Zambezi

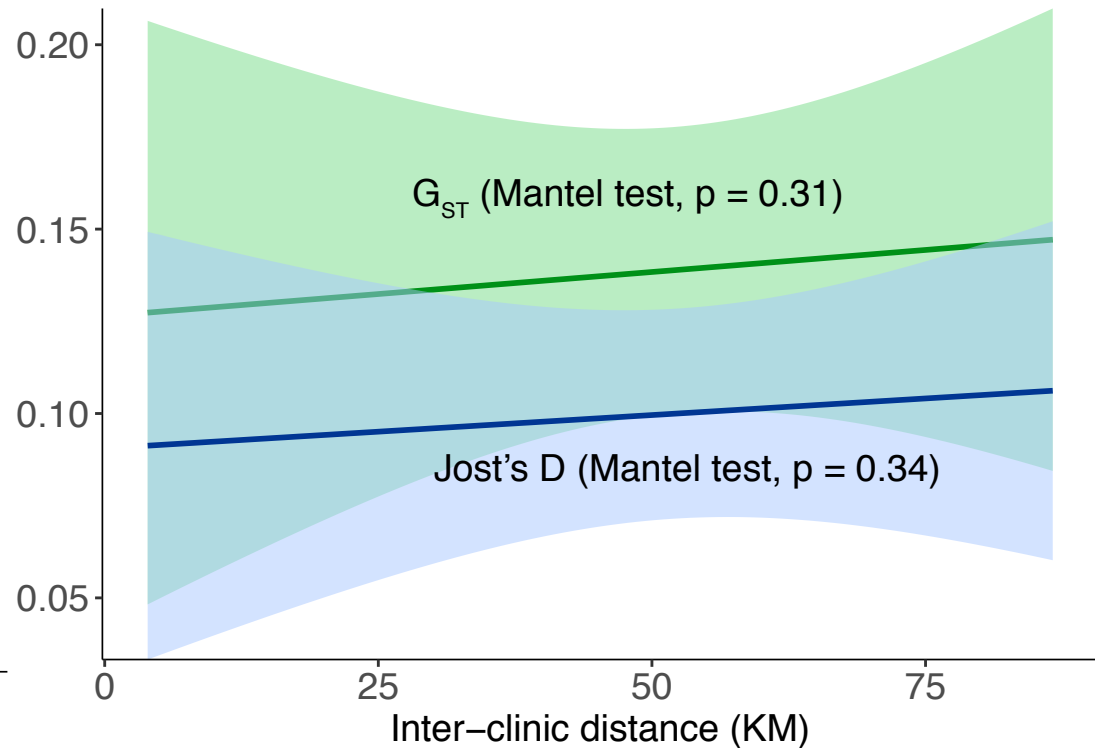

Supplement: supp [file elife-43510-supp-v1.zip › elife_poa_e43510_Figure_2_figure_supplement_4.pdf]

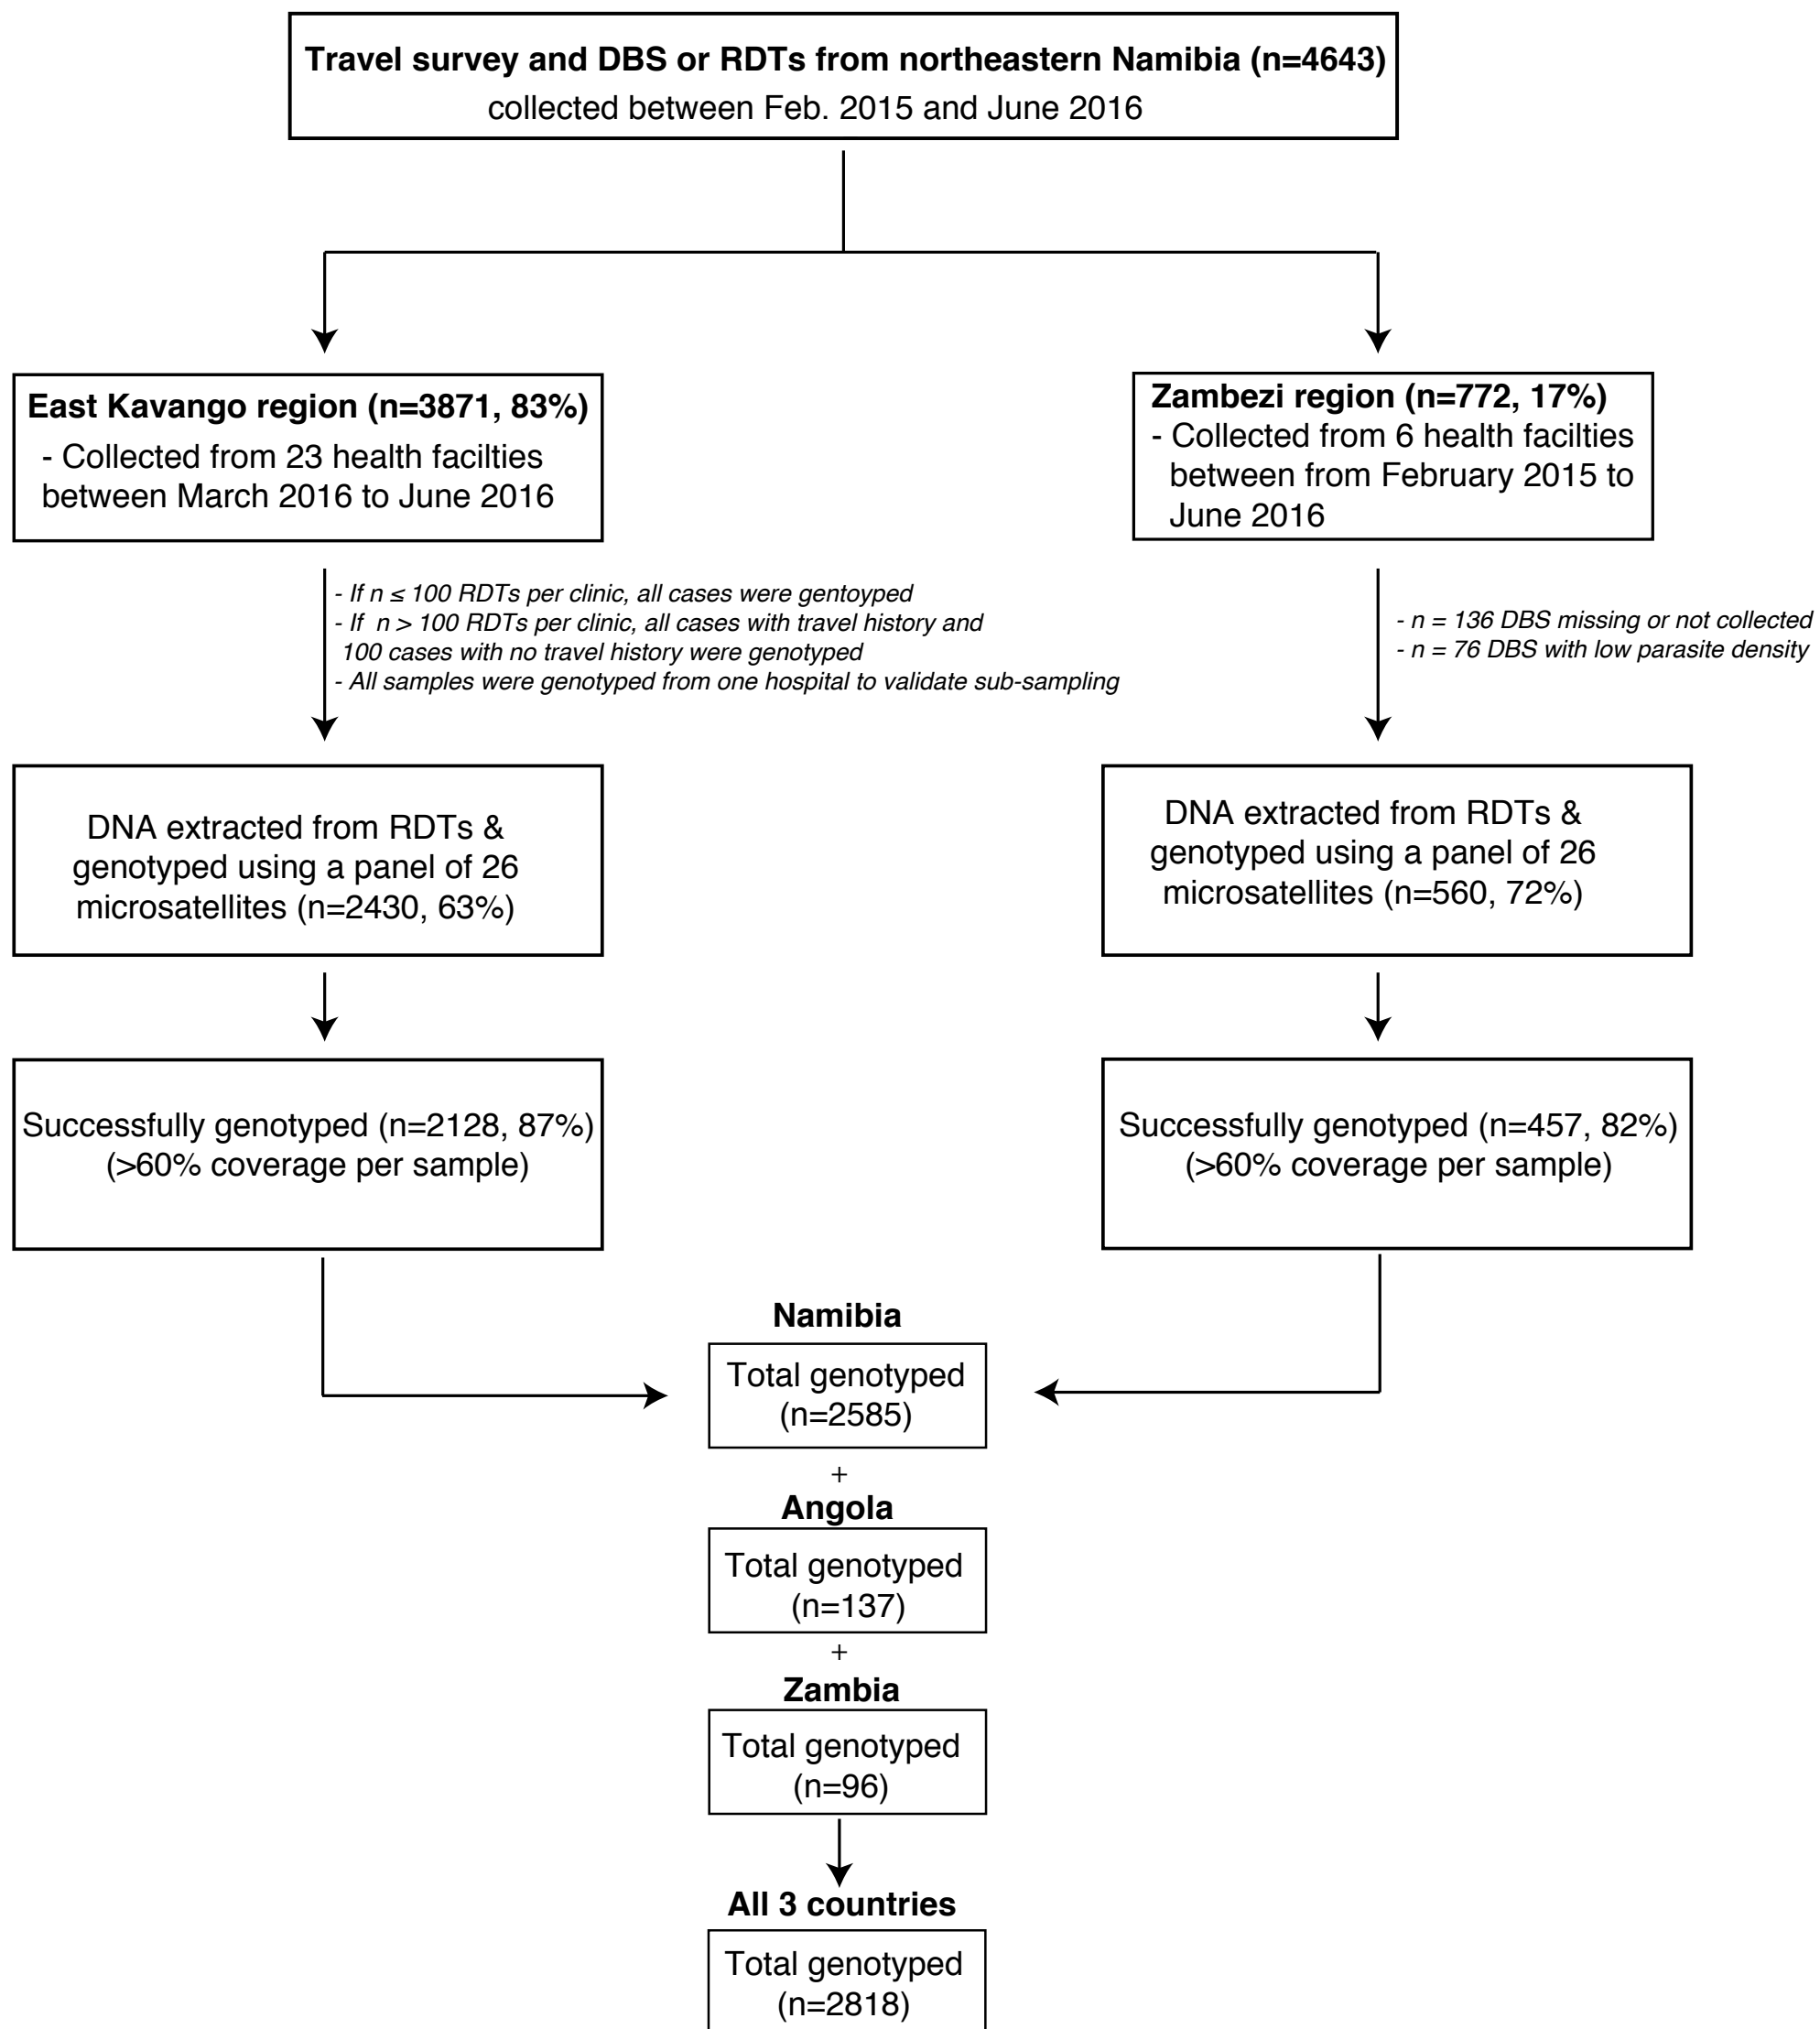

Supplement: supp [file elife-43510-supp-v1.zip › elife_poa_e43510_Figure_1_figure_supplement_1.pdf]

**A.****K=5**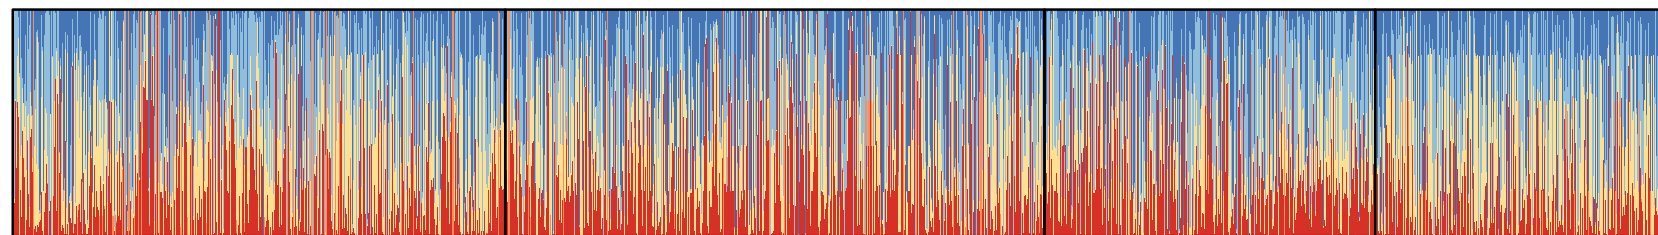

Rundu

Nyangana

Andara

Zambezi

posterior probability

0.8  
0.4  
0.0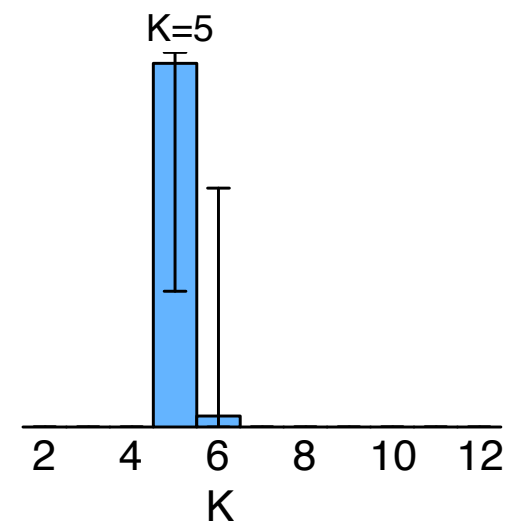**B.**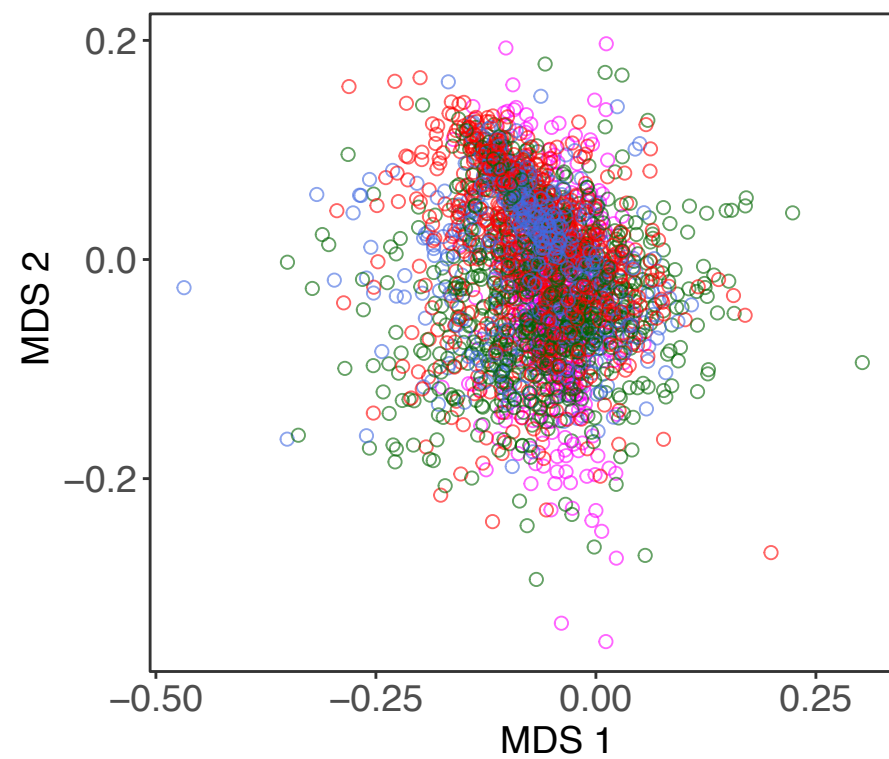**C.**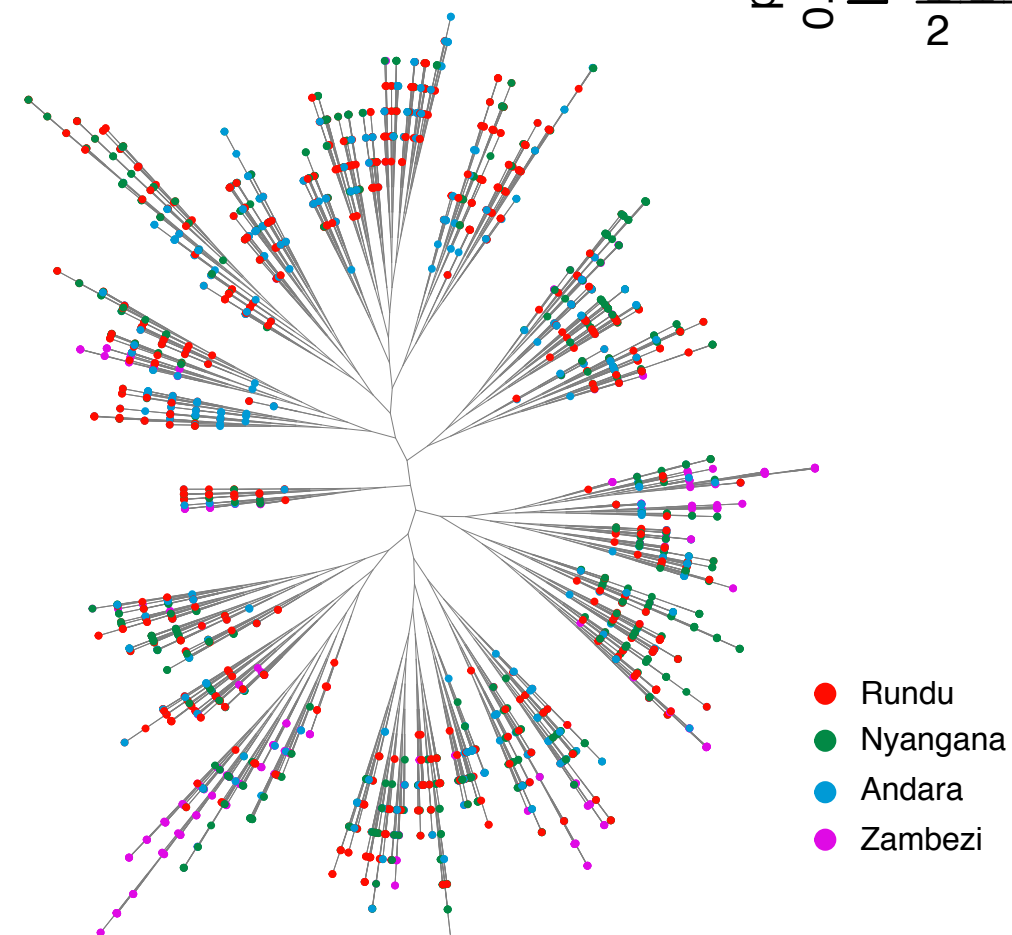

Supplement: supp [file elife-43510-supp-v1.zip › elife_poa_e43510_Figure_2_figure_supplement_3.pdf]

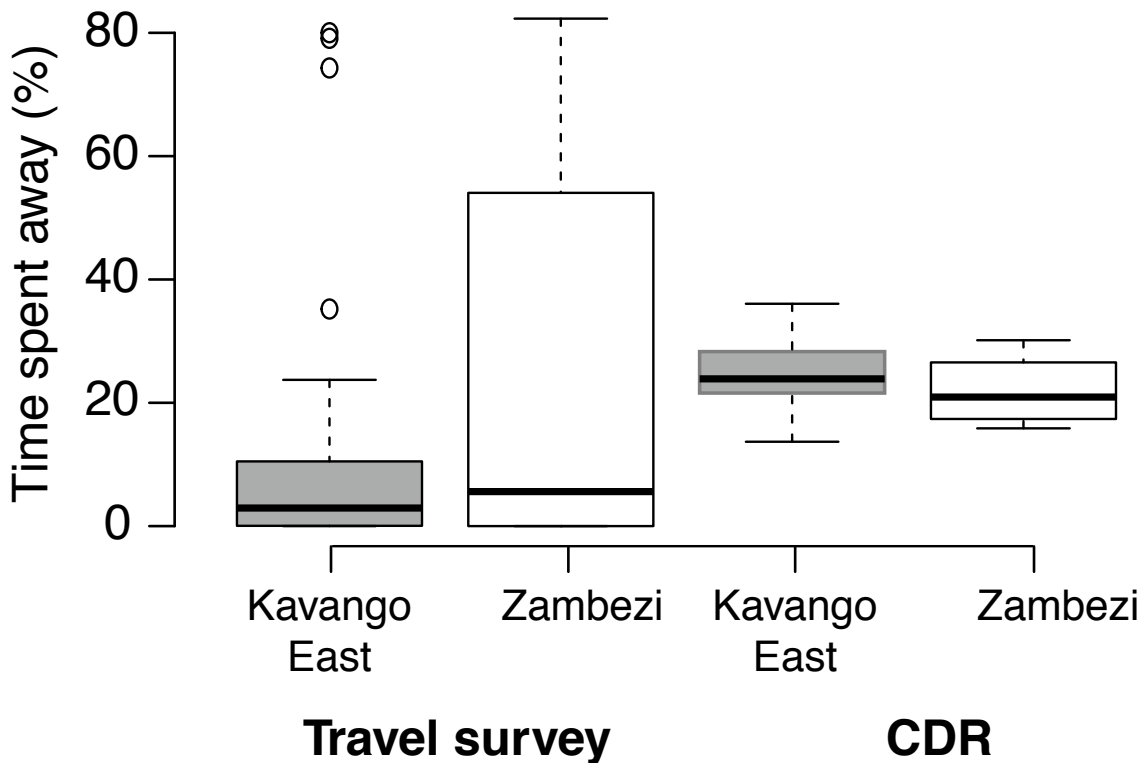

Supplement: supp [file elife-43510-supp-v1.zip › elife_poa_e43510_Figure_4_figure_supplement_1.pdf]
